# Supplementary material for: Crossover-active regions of the wheat genome are distinguished by DMC1, the chromosome axis, H3K27me3, and signatures of adaptation
Source: HighWire-hosted journal article supplement (doi:10.1101/gr.273672.120), 2021-08-23
Supplement: Supplemental_Code.docx [file Supplemental_Code.docx]

**SUPPLEMENTAL CODE:**

Custom scripts used in the preparation of this paper are provided below (each preceded by “Script: script_name.ext:”), and are also available at: https://ajtock.github.io/Wheat_DMC1_ASY1_paper/

**ChIP-seq and MNase-seq data processing and alignment workflow**

This is a Snakemake workflow for automated processing and alignment of paired-end read data derived from chromatin immunoprecipitation or micrococcal nuclease digestion followed by high-throughput sequencing (ChIP-seq or MNase-seq).

Requirements:

- Installation of Snakemake and optionally conda
- Demultiplexed paired-end reads in gzipped FASTQ format located in the data/ directory. These should be named according to the following naming convention: {sample}_R1.fastq.gz and {sample}_R2.fastq.gz
- A samtools-indexed reference genome in FASTA format and a chromosome sizes file (e.g., wheat_v1.0.fa, wheat_v1.0.fa.fai, and wheat_v1.0.fa.sizes, the latter two of which generated with samtools faidx wheat_v1.0.fa; cut -f1,2 wheat_v1.0.fa.fai > wheat_v1.0.fa.sizes), each located in data/index/. The IWGSC RefSeq v1.0 Chinese Spring genome assembly was used in this case
- A reference genome index for bowtie2, located in data/index/ (see data/index/bowtie2_index.sh for an example of how to generate this)
- Snakefile in this repository. This contains "rules" that each execute a step in the workflow
- config.yaml in this repository. This contains customizable parameters including reference, which should be the reference genome file name without the .fa extension (e.g., wheat_v1.0)
- Optional: environment.yaml in this repository, used to create the software environment if conda is used
- If conda is not used, the tools listed in environment.yaml must be specified in the PATH variable

Creating the conda environment:

conda env create --file environment.yaml --name ChIPseq_mapping

Usage:

In a Unix shell, navigate to the base directory containing Snakefile, config.yaml, environment.yaml, and the data\ subdirectory, which should have a directory tree structure like this:

.

├── alignment_summary.sh

├── config.yaml

├── data

│ ├── DMC1_Rep1_ChIP_R1.fastq.gz

│ ├── DMC1_Rep1_ChIP_R2.fastq.gz

│   └── index

│   ├── bowtie2_index.sh

│   ├── samtools_faidx_chr_sizes.sh

│   ├── wheat_v1.0.1.bt2l

│   ├── wheat_v1.0.2.bt2l

│   ├── wheat_v1.0.3.bt2l

│   ├── wheat_v1.0.4.bt2l

│   ├── wheat_v1.0.fa

│   ├── wheat_v1.0.fa.fai

│   ├── wheat_v1.0.fa.sizes

│   ├── wheat_v1.0.rev.1.bt2l

│   └── wheat_v1.0.rev.2.bt2l

├── environment.yaml

├── README.md

├── scripts

│   └── keepPaired.py

└── Snakefile

Then run the following commands in the base directory (--cores should match the THREADS parameter in config.yaml):

conda activate ChIPseq_mapping

snakemake -p --cores 48

conda deactivate

Script: environment.yaml:

channels:

- bioconda

dependencies:

- pandas=0.23.4

- fastqc=0.11.8

- bbmap=38.22

- cutadapt=1.18

- bowtie2=2.3.4.3

- samtools=1.9

- deeptools=3.1.3

Script: config.yaml:

SAMPLES: ["DMC1_Rep1_ChIP"]

THREADS: 48

MEMORY: "256g"

FILTER:

cutadapt:

R1_5prime_cut: 5 # -u

R1_3prime_cut: -4 # -u

R2_5prime_cut: 5 # -U

R2_3prime_cut: -4 # -U

adapter_R1: AGATCGGAAGAGCACACGTCTGAACTCCAGTCAC # -a

adapter_R2: AGATCGGAAGAGCGTCGTGTAGGGAAAGAGTGTAGATCTCGGTGGTCGCCGTATCATT # -A

quality-filter: 20 # -q

minimum-overlap: 3 # -O (default: 3)

minimum-length: 30 # -m

maximum-length: 76 # -M

extra-params:

# NOTE: reference genome-specific mapping parameters

MAPPING:

alignments: 4 # "In -k <N> mode, Bowtie 2 searches for up to N distinct, valid alignments for each read"

reference: "data/index/wheat_v1.0"

MAPQunique: 23 # -q

MAPQmaxi: 2 # -q

sortMemory: "5G"

COVERAGE:

normalizeUsing: "CPM"

ignoreForNormalization: "chrUn" # Reference genome-specific parameter

binSize: 1

genomeBinSize: 1000000

genomeBinName: "1Mb"

# NEBNext adapter and universal primer for Illumina:

# https://international.neb.com/-/media/catalog/datacards-or-manuals/manuale7335.pdf

# https://www.biostars.org/p/149301/

# https://cutadapt.readthedocs.io/en/stable/guide.html#illumina-truseq

# http://bioinformatics.cvr.ac.uk/blog/illumina-adapter-and-primer-sequences/

# TruSeq adapters:

# http://emea.support.illumina.com/bulletins/2016/12/what-sequences-do-i-use-for-adapter-trimming.html

Script: Snakefile:

# Snakemake workflow for aligning paired-end ChIP-seq or MNase-seq reads to a reference genome

# Chromosome sizes file below ("data/index/wheat_v1.0.fa.sizes") must exist

# before running snakemake

# e.g., in "data/index/" run:

# samtools faidx wheat_v1.0.fa; cut -f1,2 wheat_v1.0.fa.fai > wheat_v1.0.fa.sizes

# Usage ("--cores" should match the "THREADS" parameter in config.yaml, and reflect available threads):

# conda env create --file environment.yaml --name ChIPseq_mapping # On first use only

# conda activate ChIPseq_mapping

# snakemake -p --cores 48

# conda deactivate

import pandas as pd

import os

# To make the samtools rule work with a shell script ("scripts/keepPaired.py") invoked using the "shell" directive,

# we need to determine the base path of Snakefile since we expect the "scripts/" subdirectory to be located here

SRCDIR = srcdir("")

# Specify config file parameters

configfile: "config.yaml"

# Define wildcards and variables

sample = config["SAMPLES"]

reference = config["MAPPING"]["reference"]

refbase = os.path.basename(reference)

genomeBinName = config["COVERAGE"]["genomeBinName"]

# Determine bam index format (bai or csi) based on chromosome sizes

# Genomes with chromosomes longer than ~500 Mb (e.g., in wheat) require a csi index

# E.g., in axolotl: https://sourceforge.net/p/samtools/mailman/message/36249039/

chrSizes = pd.read_table("data/index/" + refbase + ".fa.sizes",

header = None)

smallChrs = 0

for x in chrSizes[1]:

if x < 5e+08:

smallChrs = smallChrs + 1

if smallChrs < len(chrSizes[1]):

bamidx = "csi"

else:

bamidx = "bai"

# Specify the desired end target file(s)

rule all:

input:

expand("logs/fastqc/raw/{sample}_R1_fastqc.html",

sample = sample),

expand("logs/fastqc/raw/{sample}_R2_fastqc.html",

sample = sample),

expand("data/dedup/{sample}_R1_dedup.fastq.gz",

sample = sample),

expand("data/dedup/{sample}_R1_dedup_repair.fastq.gz",

sample = sample),

expand("data/dedup/{sample}_R2_dedup_repair.fastq.gz",

sample = sample),

expand("data/dedup/trimmed/{sample}_R1_dedup_repair_trimmed.fastq.gz",

sample = sample),

expand("data/dedup/trimmed/{sample}_R2_dedup_repair_trimmed.fastq.gz",

sample = sample),

expand("logs/fastqc/trimmed/{sample}_R1_dedup_repair_trimmed_fastqc.html",

sample = sample),

expand("logs/fastqc/trimmed/{sample}_R2_dedup_repair_trimmed_fastqc.html",

sample = sample),

expand("mapped/{sample}_MappedOn_{refbase}.bam",

sample = sample,

refbase = refbase),

expand("mapped/both/{sample}_MappedOn_{refbase}_lowXM_both_sort.bam",

sample = sample,

refbase = refbase),

expand("mapped/unique/{sample}_MappedOn_{refbase}_lowXM_unique_sort.bam",

sample = sample,

refbase = refbase),

expand("mapped/unique/{sample}_MappedOn_{refbase}_lowXM_unique_sort.bam.{bamidx}",

sample = sample,

refbase = refbase,

bamidx = bamidx),

expand("mapped/unique/bw/{sample}_MappedOn_{refbase}_lowXM_unique_sort_norm.bw",

sample = sample,

refbase = refbase),

expand("mapped/unique/bg/{sample}_MappedOn_{refbase}_lowXM_unique_sort_norm.bedgraph",

sample = sample,

refbase = refbase),

expand("mapped/unique/bg/{sample}_MappedOn_{refbase}_lowXM_unique_sort_norm_binSize{genomeBinName}.bedgraph",

sample = sample,

refbase = refbase,

genomeBinName = genomeBinName),

expand("mapped/both/{sample}_MappedOn_{refbase}_lowXM_both_sort.bam.{bamidx}",

sample = sample,

refbase = refbase,

bamidx = bamidx),

expand("mapped/both/bw/{sample}_MappedOn_{refbase}_lowXM_both_sort_norm.bw",

sample = sample,

refbase = refbase),

expand("mapped/both/bg/{sample}_MappedOn_{refbase}_lowXM_both_sort_norm.bedgraph",

sample = sample,

refbase = refbase),

expand("mapped/both/bg/{sample}_MappedOn_{refbase}_lowXM_both_sort_norm_binSize{genomeBinName}.bedgraph",

sample = sample,

refbase = refbase,

genomeBinName = genomeBinName)

# Run fastqc on R1 raw data

rule fastqc_R1_raw:

"""Create fastqc report"""

input:

"data/{sample}_R1.fastq.gz"

output:

html = "logs/fastqc/raw/{sample}_R1_fastqc.html",

zip = "logs/fastqc/raw/{sample}_R1_fastqc.zip"

params: "--extract"

log:

"logs/fastqc/raw/{sample}_R1.log"

wrapper:

"0.27.1/bio/fastqc"

# Run fastqc on R2 raw data

rule fastqc_R2_raw:

"""Create fastqc report"""

input:

"data/{sample}_R2.fastq.gz"

output:

html = "logs/fastqc/raw/{sample}_R2_fastqc.html",

zip = "logs/fastqc/raw/{sample}_R2_fastqc.zip"

params: "--extract"

log:

"logs/fastqc/raw/{sample}_R2.log"

wrapper:

"0.27.1/bio/fastqc"

# Deduplicate R1 reads

rule dedupe_R1:

"""Remove duplicate R1 reads"""

input:

"data/{sample}_R1.fastq.gz"

output:

"data/dedup/{sample}_R1_dedup.fastq.gz"

threads: config["THREADS"]

params:

memory = config["MEMORY"]

log:

"logs/dedup/{sample}_R1_dedup.log"

shell:

"(dedupe.sh -Xmx{params.memory} in={input} out={output}"

" threads={threads} ac=f) 2> {log}"

# Re-pair separately deduplicated reads

rule repair:

"""Re-pair separately deduplicated reads"""

input:

fastq1 = "data/dedup/{sample}_R1_dedup.fastq.gz",

fastq2 = "data/{sample}_R2.fastq.gz"

output:

fastq1 = "data/dedup/{sample}_R1_dedup_repair.fastq.gz",

fastq2 = "data/dedup/{sample}_R2_dedup_repair.fastq.gz",

fastq3 = "data/dedup/{sample}_dedup_singletons.fastq.gz"

params:

memory = config["MEMORY"]

log:

"logs/repair/{sample}_R1_R2_dedup_repair.log"

shell:

"(repair.sh -Xmx{params.memory} repair=t"

" in1={input.fastq1} in2={input.fastq2}"

" out1={output.fastq1} out2={output.fastq2}"

" outs={output.fastq3}) 2> {log}"

# Trim off adapters

rule cutadapt:

"""Remove adapters"""

input:

"data/dedup/{sample}_R1_dedup_repair.fastq.gz",

"data/dedup/{sample}_R2_dedup_repair.fastq.gz"

output:

fastq1 = "data/dedup/trimmed/{sample}_R1_dedup_repair_trimmed.fastq.gz",

fastq2 = "data/dedup/trimmed/{sample}_R2_dedup_repair_trimmed.fastq.gz",

qc = "data/dedup/trimmed/{sample}_dedup_repair_trimmed.qc.txt"

params:

" -u " + str(config["FILTER"]["cutadapt"]["R1_5prime_cut"]) +

" -u " + str(config["FILTER"]["cutadapt"]["R1_3prime_cut"]) +

" -U " + str(config["FILTER"]["cutadapt"]["R2_5prime_cut"]) +

" -U " + str(config["FILTER"]["cutadapt"]["R2_3prime_cut"]) +

" -a " + config["FILTER"]["cutadapt"]["adapter_R1"] +

" -A " + config["FILTER"]["cutadapt"]["adapter_R2"] +

" -O " + str(config["FILTER"]["cutadapt"]["minimum-overlap"]) +

" -q " + str(config["FILTER"]["cutadapt"]["quality-filter"]) +

" -m " + str(config["FILTER"]["cutadapt"]["minimum-length"]) +

" -M " + str(config["FILTER"]["cutadapt"]["maximum-length"]) +

" --cores=0"

log:

"logs/cutadapt/{sample}_dedup_repair_trimmed.log"

wrapper:

"0.27.1/bio/cutadapt/pe"

# Run fastqc on R1 trimmed data

rule fastqc_R1_trimmed:

"""Create fastqc report"""

input:

"data/dedup/trimmed/{sample}_R1_dedup_repair_trimmed.fastq.gz"

output:

html = "logs/fastqc/trimmed/{sample}_R1_dedup_repair_trimmed_fastqc.html",

zip = "logs/fastqc/trimmed/{sample}_R1_dedup_repair_trimmed_fastqc.zip"

params: "--extract"

log:

"logs/fastqc/trimmed/{sample}_R1_dedup_repair_trimmed.log"

wrapper:

"0.27.1/bio/fastqc"

# Run fastqc on R2 trimmed data

rule fastqc_R2_trimmed:

"""Create fastqc report"""

input:

"data/dedup/trimmed/{sample}_R2_dedup_repair_trimmed.fastq.gz"

output:

html = "logs/fastqc/trimmed/{sample}_R2_dedup_repair_trimmed_fastqc.html",

zip = "logs/fastqc/trimmed/{sample}_R2_dedup_repair_trimmed_fastqc.zip"

params: "--extract"

log:

"logs/fastqc/trimmed/{sample}_R2_dedup_repair_trimmed.log"

wrapper:

"0.27.1/bio/fastqc"

# Align to reference genome

rule bowtie2:

"""Map reads using bowtie2 and sort them using samtools"""

input:

fastq1 = "data/dedup/trimmed/{sample}_R1_dedup_repair_trimmed.fastq.gz",

fastq2 = "data/dedup/trimmed/{sample}_R2_dedup_repair_trimmed.fastq.gz"

output:

protected("mapped/{sample}_MappedOn_{refbase}.bam")

params:

alignments = config["MAPPING"]["alignments"],

MAPQmaxi = config["MAPPING"]["MAPQmaxi"]

threads: config["THREADS"]

log:

"logs/bowtie2/{sample}_MappedOn_{refbase}_sort.log"

shell:

# -f 3 includes only concordantly aligned read pairs, and not unpaired reads

# -F 2316 excludes unmapped reads (their mates too),

# as well as secondary and supplementary alignments

# Exclude alignments with MAPQ < config["MAPPING"]["MAPQmaxi"]

"(bowtie2 --very-sensitive --no-mixed --no-discordant"

" --threads {threads} -k {params.alignments}"

" -x {reference} -1 {input.fastq1} -2 {input.fastq2} "

"| samtools view -bh -@ {threads} -f 3 -F 2316 -q {params.MAPQmaxi} -o {output} - ) 2> {log}"

# Filter alignments for mismatches and extract alignments consisting

# of at least 1 uniquely aligned read in a pair

rule samtools:

input:

"mapped/{sample}_MappedOn_{refbase}.bam"

output:

both = protected("mapped/both/{sample}_MappedOn_{refbase}_lowXM_both_sort.bam"),

unique = protected("mapped/unique/{sample}_MappedOn_{refbase}_lowXM_unique_sort.bam")

params:

sortMemory = config["MAPPING"]["sortMemory"],

MAPQunique = config["MAPPING"]["MAPQunique"]

threads: config["THREADS"]

log:

both = "logs/samtools/{sample}_MappedOn_{refbase}_lowXM_both_sort.log",

unique = "logs/samtools/{sample}_MappedOn_{refbase}_lowXM_unique_sort.log"

shell:

# Allow a maximum of 6 mismatches

# ([^0-9] matches characters not in the range of 0 to 9)

# http://seqanswers.com/forums/showthread.php?t=19729

"(samtools view -h {input} "

"| grep -e '^@' -e 'XM:i:[0-6][^0-9]' "

# Retain alignments for which the names of both reads in a pair are the same

"| scripts/keepPaired.py "

"| samtools view -u - "

"| samtools sort -@ {threads} -m {params.sortMemory} -o {output.both}) 2> {log.both}; "

# Extract unique alignments, excluding alignments with MAPQ scores < config["MAPPING"]["MAPQunique"]

# http://biofinysics.blogspot.com/2014/05/how-does-bowtie2-assign-mapq-scores.html

# https://sequencing.qcfail.com/articles/mapq-values-are-really-useful-but-their-implementation-is-a-mess/

"(samtools view -h -q {params.MAPQunique} {input} "

"| grep -e '^@' -e 'XM:i:[0-6][^0-9]' "

# Retain alignments for which the names of both reads in a pair are the same

"| scripts/keepPaired.py "

"| samtools view -u - "

"| samtools sort -@ {threads} -m {params.sortMemory} -o {output.unique}) 2> {log.unique}"

# Postmapping steps:

# Index BAM files (index format [bai or csi] depends on chromosome sizes)

# Generate samtools flagstat and idxstats

# Calculate library-size-normalized coverage

if bamidx == "bai":

rule postmapping:

"""bam.bai samtools flagstat idxstats"""

input:

uniqueBAM = "mapped/unique/{sample}_MappedOn_{refbase}_lowXM_unique_sort.bam",

bothBAM = "mapped/both/{sample}_MappedOn_{refbase}_lowXM_both_sort.bam"

output:

uniqueBAM = "mapped/unique/{sample}_MappedOn_{refbase}_lowXM_unique_sort.bam.{bamidx}",

bothBAM = "mapped/both/{sample}_MappedOn_{refbase}_lowXM_both_sort.bam.{bamidx}"

log:

uniqueflagstat = "logs/samtools/stats/{sample}_MappedOn_{refbase}_lowXM_unique_sort_flagstat.log",

bothflagstat = "logs/samtools/stats/{sample}_MappedOn_{refbase}_lowXM_both_sort_flagstat.log",

uniqueidxstats = "logs/samtools/stats/{sample}_MappedOn_{refbase}_lowXM_unique_sort_idxstats.log",

bothidxstats = "logs/samtools/stats/{sample}_MappedOn_{refbase}_lowXM_both_sort_idxstats.log"

shell:

"""

samtools index {input.uniqueBAM}

samtools flagstat {input.uniqueBAM} > {log.uniqueflagstat}

samtools idxstats {input.uniqueBAM} > {log.uniqueidxstats}

samtools index {input.bothBAM}

samtools flagstat {input.bothBAM} > {log.bothflagstat}

samtools idxstats {input.bothBAM} > {log.bothidxstats}

"""

rule calc_coverage:

"""Calculate library-size-normalized coverage"""

input:

uniqueBAM = "mapped/unique/{sample}_MappedOn_{refbase}_lowXM_unique_sort.bam",

bothBAM = "mapped/both/{sample}_MappedOn_{refbase}_lowXM_both_sort.bam",

uniqueBAMidx = "mapped/unique/{sample}_MappedOn_{refbase}_lowXM_unique_sort.bam.bai",

bothBAMidx = "mapped/both/{sample}_MappedOn_{refbase}_lowXM_both_sort.bam.bai"

output:

uniqueBW = "mapped/unique/bw/{sample}_MappedOn_{refbase}_lowXM_unique_sort_norm.bw",

bothBW = "mapped/both/bw/{sample}_MappedOn_{refbase}_lowXM_both_sort_norm.bw",

uniqueBG = "mapped/unique/bg/{sample}_MappedOn_{refbase}_lowXM_unique_sort_norm.bedgraph",

bothBG = "mapped/both/bg/{sample}_MappedOn_{refbase}_lowXM_both_sort_norm.bedgraph"

params:

normalizeUsing = config["COVERAGE"]["normalizeUsing"],

ignoreForNormalization = config["COVERAGE"]["ignoreForNormalization"],

binSize = config["COVERAGE"]["binSize"]

log:

unique = "logs/bamCoverage/{sample}_MappedOn_{refbase}_lowXM_unique_sort_norm.log",

both = "logs/bamCoverage/{sample}_MappedOn_{refbase}_lowXM_both_sort_norm.log"

threads: config["THREADS"]

shell:

"(bamCoverage -b {input.uniqueBAM} -o {output.uniqueBW}"

" --normalizeUsing {params.normalizeUsing}"

" --ignoreForNormalization {params.ignoreForNormalization}"

" --extendReads"

" --binSize {params.binSize} -p {threads}; "

"bamCoverage -b {input.uniqueBAM} -o {output.uniqueBG} -of bedgraph"

" --normalizeUsing {params.normalizeUsing}"

" --ignoreForNormalization {params.ignoreForNormalization}"

" --extendReads"

" --binSize {params.binSize} -p {threads}) 2> {log.unique}; "

"(bamCoverage -b {input.bothBAM} -o {output.bothBW}"

" --normalizeUsing {params.normalizeUsing}"

" --ignoreForNormalization {params.ignoreForNormalization}"

" --extendReads"

" --binSize {params.binSize} -p {threads}; "

"bamCoverage -b {input.bothBAM} -o {output.bothBG} -of bedgraph"

" --normalizeUsing {params.normalizeUsing}"

" --ignoreForNormalization {params.ignoreForNormalization}"

" --extendReads"

" --binSize {params.binSize} -p {threads}) 2> {log.both}"

rule calc_coverage_genome:

"""Calculate library-size-normalized coverage in adjacent windows"""

input:

uniqueBAM = "mapped/unique/{sample}_MappedOn_{refbase}_lowXM_unique_sort.bam",

bothBAM = "mapped/both/{sample}_MappedOn_{refbase}_lowXM_both_sort.bam",

uniqueBAMidx = "mapped/unique/{sample}_MappedOn_{refbase}_lowXM_unique_sort.bam.bai",

bothBAMidx = "mapped/both/{sample}_MappedOn_{refbase}_lowXM_both_sort.bam.bai"

output:

uniqueBGgenome = "mapped/unique/bg/{sample}_MappedOn_{refbase}_lowXM_unique_sort_norm_binSize{genomeBinName}.bedgraph",

bothBGgenome = "mapped/both/bg/{sample}_MappedOn_{refbase}_lowXM_both_sort_norm_binSize{genomeBinName}.bedgraph"

params:

normalizeUsing = config["COVERAGE"]["normalizeUsing"],

ignoreForNormalization = config["COVERAGE"]["ignoreForNormalization"],

genomeBinSize = config["COVERAGE"]["genomeBinSize"]

log:

unique = "logs/bamCoverage/{sample}_MappedOn_{refbase}_lowXM_unique_sort_norm_binSize{genomeBinName}.log",

both = "logs/bamCoverage/{sample}_MappedOn_{refbase}_lowXM_both_sort_norm_binSize{genomeBinName}.log"

threads: config["THREADS"]

shell:

"(bamCoverage -b {input.uniqueBAM} -o {output.uniqueBGgenome} -of bedgraph"

" --normalizeUsing {params.normalizeUsing}"

" --ignoreForNormalization {params.ignoreForNormalization}"

" --extendReads"

" --binSize {params.genomeBinSize} -p {threads}) 2> {log.unique}; "

"(bamCoverage -b {input.bothBAM} -o {output.bothBGgenome} -of bedgraph"

" --normalizeUsing {params.normalizeUsing}"

" --ignoreForNormalization {params.ignoreForNormalization}"

" --extendReads"

" --binSize {params.genomeBinSize} -p {threads}) 2> {log.both}"

else:

rule postmapping:

"""bam.csi samtools flagstat idxstats"""

input:

uniqueBAM = "mapped/unique/{sample}_MappedOn_{refbase}_lowXM_unique_sort.bam",

bothBAM = "mapped/both/{sample}_MappedOn_{refbase}_lowXM_both_sort.bam"

output:

uniqueBAM = "mapped/unique/{sample}_MappedOn_{refbase}_lowXM_unique_sort.bam.{bamidx}",

bothBAM = "mapped/both/{sample}_MappedOn_{refbase}_lowXM_both_sort.bam.{bamidx}"

log:

uniqueflagstat = "logs/samtools/stats/{sample}_MappedOn_{refbase}_lowXM_unique_sort_flagstat.log",

bothflagstat = "logs/samtools/stats/{sample}_MappedOn_{refbase}_lowXM_both_sort_flagstat.log",

uniqueidxstats = "logs/samtools/stats/{sample}_MappedOn_{refbase}_lowXM_unique_sort_idxstats.log",

bothidxstats = "logs/samtools/stats/{sample}_MappedOn_{refbase}_lowXM_both_sort_idxstats.log"

shell:

"""

samtools index -c -m 14 {input.uniqueBAM}

samtools flagstat {input.uniqueBAM} > {log.uniqueflagstat}

samtools idxstats {input.uniqueBAM} > {log.uniqueidxstats}

samtools index -c -m 14 {input.bothBAM}

samtools flagstat {input.bothBAM} > {log.bothflagstat}

samtools idxstats {input.bothBAM} > {log.bothidxstats}

"""

rule calc_coverage:

"""Calculate library-size-normalized coverage"""

input:

uniqueBAM = "mapped/unique/{sample}_MappedOn_{refbase}_lowXM_unique_sort.bam",

bothBAM = "mapped/both/{sample}_MappedOn_{refbase}_lowXM_both_sort.bam",

uniqueBAMidx = "mapped/unique/{sample}_MappedOn_{refbase}_lowXM_unique_sort.bam.csi",

bothBAMidx = "mapped/both/{sample}_MappedOn_{refbase}_lowXM_both_sort.bam.csi"

output:

uniqueBW = "mapped/unique/bw/{sample}_MappedOn_{refbase}_lowXM_unique_sort_norm.bw",

bothBW = "mapped/both/bw/{sample}_MappedOn_{refbase}_lowXM_both_sort_norm.bw",

uniqueBG = "mapped/unique/bg/{sample}_MappedOn_{refbase}_lowXM_unique_sort_norm.bedgraph",

bothBG = "mapped/both/bg/{sample}_MappedOn_{refbase}_lowXM_both_sort_norm.bedgraph"

params:

normalizeUsing = config["COVERAGE"]["normalizeUsing"],

ignoreForNormalization = config["COVERAGE"]["ignoreForNormalization"],

binSize = config["COVERAGE"]["binSize"]

log:

unique = "logs/bamCoverage/{sample}_MappedOn_{refbase}_lowXM_unique_sort_norm.log",

both = "logs/bamCoverage/{sample}_MappedOn_{refbase}_lowXM_both_sort_norm.log"

threads: config["THREADS"]

shell:

"(bamCoverage -b {input.uniqueBAM} -o {output.uniqueBW}"

" --normalizeUsing {params.normalizeUsing}"

" --ignoreForNormalization {params.ignoreForNormalization}"

" --extendReads"

" --binSize {params.binSize} -p {threads}; "

"bamCoverage -b {input.uniqueBAM} -o {output.uniqueBG} -of bedgraph"

" --normalizeUsing {params.normalizeUsing}"

" --ignoreForNormalization {params.ignoreForNormalization}"

" --extendReads"

" --binSize {params.binSize} -p {threads}) 2> {log.unique}; "

"(bamCoverage -b {input.bothBAM} -o {output.bothBW}"

" --normalizeUsing {params.normalizeUsing}"

" --ignoreForNormalization {params.ignoreForNormalization}"

" --extendReads"

" --binSize {params.binSize} -p {threads}; "

"bamCoverage -b {input.bothBAM} -o {output.bothBG} -of bedgraph"

" --normalizeUsing {params.normalizeUsing}"

" --ignoreForNormalization {params.ignoreForNormalization}"

" --extendReads"

" --binSize {params.binSize} -p {threads}) 2> {log.both}"

rule calc_coverage_genome:

"""Calculate library-size-normalized coverage in adjacent windows"""

input:

uniqueBAM = "mapped/unique/{sample}_MappedOn_{refbase}_lowXM_unique_sort.bam",

bothBAM = "mapped/both/{sample}_MappedOn_{refbase}_lowXM_both_sort.bam",

uniqueBAMidx = "mapped/unique/{sample}_MappedOn_{refbase}_lowXM_unique_sort.bam.csi",

bothBAMidx = "mapped/both/{sample}_MappedOn_{refbase}_lowXM_both_sort.bam.csi"

output:

uniqueBGgenome = "mapped/unique/bg/{sample}_MappedOn_{refbase}_lowXM_unique_sort_norm_binSize{genomeBinName}.bedgraph",

bothBGgenome = "mapped/both/bg/{sample}_MappedOn_{refbase}_lowXM_both_sort_norm_binSize{genomeBinName}.bedgraph"

params:

normalizeUsing = config["COVERAGE"]["normalizeUsing"],

ignoreForNormalization = config["COVERAGE"]["ignoreForNormalization"],

genomeBinSize = config["COVERAGE"]["genomeBinSize"]

log:

unique = "logs/bamCoverage/{sample}_MappedOn_{refbase}_lowXM_unique_sort_norm_binSize{genomeBinName}.log",

both = "logs/bamCoverage/{sample}_MappedOn_{refbase}_lowXM_both_sort_norm_binSize{genomeBinName}.log"

threads: config["THREADS"]

shell:

"(bamCoverage -b {input.uniqueBAM} -o {output.uniqueBGgenome} -of bedgraph"

" --normalizeUsing {params.normalizeUsing}"

" --ignoreForNormalization {params.ignoreForNormalization}"

" --extendReads"

" --binSize {params.genomeBinSize} -p {threads}) 2> {log.unique}; "

"(bamCoverage -b {input.bothBAM} -o {output.bothBGgenome} -of bedgraph"

" --normalizeUsing {params.normalizeUsing}"

" --ignoreForNormalization {params.ignoreForNormalization}"

" --extendReads"

" --binSize {params.genomeBinSize} -p {threads}) 2> {log.both}"

Script: keepPaired.py:

#!/usr/bin/python2.7

# Script by Devon Ryan ( https://www.biostars.org/p/95929/ )

# for retaining filtered alignments that consist of both reads in a pair

# It achieves this by checking for matching consecutive read names corresponding to a read pair

import csv

import sys

f = csv.reader(sys.stdin, dialect="excel-tab")

of = csv.writer(sys.stdout, dialect="excel-tab")

last_read = None

for line in f :

# Take care of the header

if(line[0][0] == "@") :

of.writerow(line)

continue

if(last_read == None) :

last_read = line

else :

if(last_read[0] == line[0]) :

of.writerow(last_read)

of.writerow(line)

last_read = None

else :

last_read = line

**BS-seq data processing and alignment workflow**

This is a Snakemake workflow for automated processing of DNA methylation data derived from whole-genome bisulfite sequencing (BS-seq or WGBS) or NEBNext Enzymatic Methyl-seq (EM-seq).

Requirements:

- Installation of Snakemake and optionally conda
- Demultiplexed paired-end reads in gzipped FASTQ format located in the data/ directory. These should be named according to the following naming convention: {sample}_R1.fastq.gz and {sample}_R2.fastq.gz
- A reference genome in FASTA format (e.g., wheat_v1.0_incl_organelles_controls.fa) and a chromosome sizes file (e.g., wheat_v1.0_incl_organelles_controls.fa.sizes, generated with samtools faidx wheat_v1.0_incl_organelles_controls.fa; cut -f1,2 wheat_v1.0_incl_organelles_controls.fa.fai > wheat_v1.0_incl_organelles_controls.fa.sizes), both located in data/index/. No other FASTA-format files should be located in this directory. The IWGSC RefSeq v1.0 Chinese Spring genome assembly was used in this case
- A bisulfite-converted reference genome index for bowtie2, located in data/index/ (see data/index/bismark_genome_preparation.sh for an example of how to generate data/index/Bisulfite_Genome/)
- Snakefile in this repository. This contains "rules" that each execute a step in the workflow
- config.yaml in this repository. This contains customizable parameters including reference_prefix, which should be the reference genome file name without the .fa extension (e.g., wheat_v1.0_incl_organelles_controls)
- Optional: environment.yaml in this repository, used to create the software environment if conda is used
- If conda is not used, bismark, bowtie2, fastqc, trim_galore, samtools, deeptools, ucsc-bedgraphtobigwig and python3 must be specified in the PATH variable

Creating the conda environment:

conda env create --file environment.yaml --name BSseq_mapping

Usage:

In a Unix shell, navigate to the base directory containing Snakefile, config.yaml, environment.yaml, and the data\ subdirectory, which should have a directory tree structure like this:

.

├── config.yaml

├── data

│   ├── BSseq_Rep8a_SRR6792678_R1.fastq.gz

│   ├── BSseq_Rep8a_SRR6792678_R2.fastq.gz

│   └── index

│ ├── bismark_genome_preparation.sh

│ ├── Bisulfite_Genome

│ │   ├── CT_conversion

│ │   │   ├── BS_CT.1.bt2l

│ │   │   ├── BS_CT.2.bt2l

│ │   │   ├── BS_CT.3.bt2l

│ │   │   ├── BS_CT.4.bt2l

│ │   │   ├── BS_CT.rev.1.bt2l

│ │   │   ├── BS_CT.rev.2.bt2l

│ │   │   └── genome_mfa.CT_conversion.fa

│ │   └── GA_conversion

│ │   ├── BS_GA.1.bt2l

│ │   ├── BS_GA.2.bt2l

│ │   ├── BS_GA.3.bt2l

│ │   ├── BS_GA.4.bt2l

│ │   ├── BS_GA.rev.1.bt2l

│ │   ├── BS_GA.rev.2.bt2l

│ │   └── genome_mfa.GA_conversion.fa

│ ├── cat_wheat_nuclear_chloroplast_mitochondrial_genomes_and_control_sequences.sh

│ ├── genomic_nucleotide_frequencies.txt

│ ├── README_chloroplast_Lambda_pUC19_control_sequences.txt

│ ├── samtools_faidx_chr_sizes.sh

│ ├── separate_nuclear_organelles_controls

│ │   ├── lambda_NEB.fa

│ │   ├── pUC19_NEB.fa

│ │   ├── wheat_CS_chloroplast_genome.fa

│ │   ├── wheat_CS_mitochondrial_genome.fa

│ │   └── wheat_v1.0.fa

│ ├── wheat_v1.0_incl_organelles_controls.fa

│ ├── wheat_v1.0_incl_organelles_controls.fa.fai

│ └── wheat_v1.0_incl_organelles_controls.fa.sizes

├── environment.yaml

├── README.md

└── Snakefile

Then run the following commands in the base directory (--cores should match the THREADS parameter in config.yaml):

conda activate BSseq_mapping

snakemake -p --cores 48

conda deactivate

Script: environment.yaml:

channels:

- bioconda

dependencies:

- bowtie2=2.3.5

- fastqc=0.11.8

- trim-galore=0.6.4

- samtools=1.9

- bismark=0.20.0

- python=3.7.3

- pandas=0.25.1

- cutadapt=2.5

- ucsc-bedgraphtobigwig=357

- deeptools=3.3.1

- perl-gdgraph=1.54

Script: config.yaml:

SAMPLES: ["BSseq_Rep8a_SRR6792678"]

THREADS: 48

## Trim Galore!

TRIM:

# Trim 10 bp off read 5' ends

R1_5prime_cut: "10" # --clip_R1

R2_5prime_cut: "10" # --clip_R2

## Bismark and SAMtools

# NOTE: reference genome-specific mapping parameters

MAPPING:

# This directory must contain the bisulfite-converted

# reference genome index for bowtie2, generated by

# data/index/bismark_genome_preparation.sh;

# i.e., a subdirectory named "Bisulfite_Genome".

# It must also contain the FASTA file from which the

# index was built (e.g., wheat_v1.0_incl_organelles_controls.fa),

# and a chromosome sizes file (e.g., wheat_v1.0_incl_organelles_controls.fa.sizes),

# generated with:

# samtools faidx wheat_v1.0_incl_organelles_controls.fa; cut -f1,2 wheat_v1.0_incl_organelles_controls.fa.fai > wheat_v1.0_incl_organelles_controls.fa.sizes

reference: "data/index/"

# reference_prefix is used for naming alignment output files;

# this should be the name of the FASTA file (e.g., wheat_v1.0_incl_organelles_controls.fa)

# without the .fa extension

reference_prefix: "wheat_v1.0_incl_organelles_controls"

extra_params_bismark: ""

# Example to relax mapping

#extra_params_bismark: "--score_min L,0,-0.4"

sortMemory: "4G"

## bamCoverage

COVERAGE:

binSize: 50

## bismark2bedGraph

BEDGRAPH:

# --buffer_size (e.g., 50%) option applies only when UNIX 'sort' is used

# UNIX 'sort' is not used where --ample_memory is specified

# "This may result in a faster sorting process for very large files,

# but this comes at the cost of a larger memory footprint...

# Note however that due to the overheads of creating and looping

# through arrays, this option might in fact be *slower* for small-ish

# files (up to a few million alignments). Note also that this option is

# not currently compatible with options '--scaffolds/--gazillion'."

# --buffer_size 50% would be more appropriate than --ample_memory

# for smaller genomes (e.g., TAIR10)

sortMemory: "--ample_memory"

Script: Snakefile:

# Snakemake workflow for automated processing of DNA methylation data

# derived from whole-genome bisulfite sequencing (WGBS or BS-seq)

# Adapted from https://github.com/seb-mueller/snakemake-bisulfite

## ***IMPORTANT***: This Snakemake pipeline should not be run with

## Bismark version 0.21.0 or later due to the addition of HISAT2 support,

## which requires Python 2, which conflicts with the Python 3 requirements

## of other parts of this pipeline (e.g., the pigz part of the trim_galore rule)

# Chromosome sizes file below ("data/index/wheat_v1.0_incl_organelles_controls.fa.sizes") must exist

# before running snakemake

# e.g., in "data/index/" run:

# samtools faidx wheat_v1.0_incl_organelles_controls.fa;

# cut -f1,2 wheat_v1.0_incl_organelles_controls.fa.fai > wheat_v1.0_incl_organelles_controls.fa.sizes

# Usage (snakemake --cores should reflect available cores):

# conda env create --file environment.yaml --name BSseq_mapping

# conda activate BSseq_mapping

# snakemake -p --cores 48

# conda deactivate

import pandas as pd

import os

# To make rules work with a shell script invoked using the "shell" directive,

# we need to determine the base path of Snakefile

SRCDIR = srcdir("")

# Specify config file parameters

configfile: "config.yaml"

# Define wildcards and variables

sample = config["SAMPLES"]

# An alternative approach would be globbing for filenames:

#sample = glob_wildcards("data/{S}_R1.fastq.gz").S

reference = config["MAPPING"]["reference"]

refbase = config["MAPPING"]["reference_prefix"]

mate = ['R1', 'R2']

context = ['CpG','CHG','CHH']

cwd = os.getcwd() + "/"

print(sample)

print(reference)

print(refbase)

print(mate)

print(context)

# Determine bam index format (bai or csi) based on chromosome sizes

# Genomes with chromosomes longer than ~500 Mb (e.g., in wheat) require a csi index

# E.g., in axolotl: https://sourceforge.net/p/samtools/mailman/message/36249039/

chrSizes = pd.read_table(reference + refbase + ".fa.sizes",

header = None)

smallChrs = 0

for x in chrSizes[1]:

if x < 5e+08:

smallChrs = smallChrs + 1

if smallChrs < len(chrSizes[1]):

bamidx = "csi"

else:

bamidx = "bai"

# bash safe mode

shell.executable("/bin/bash")

shell.prefix("set -euo pipefail; ")

# ruleorder: fastqc_raw > trim_galore > fastqc_trimmed > bismark > deduplicate_bismark > samtools > bamCoverage > methylation_extractor > bismark2bedGraph > bedGraphToBigWig > coverage2cytosine

rule all:

input:

# fastqc_raw

expand("logs/fastqc/raw/{sample}_{mate}_fastqc.html",

sample = sample,

mate = mate),

# trim_galore

expand("trimmed/{sample}_{mate}_trimmed.fastq.gz",

sample = sample,

mate = mate),

# fastqc_trimmed

expand("logs/fastqc/trimmed/{sample}_{mate}_trimmed_fastqc.html",

sample = sample,

mate = mate),

# bismark

expand("mapped/{sample}_MappedOn_{refbase}.bam",

sample = sample,

refbase = refbase),

# deduplicate_bismark

expand("mapped/dedup/{sample}_MappedOn_{refbase}_dedup.bam",

sample = sample,

refbase = refbase),

expand("mapped/dedup/{sample}_MappedOn_{refbase}_dedup_sort.bam",

sample = sample,

refbase = refbase),

# samtools

expand("mapped/dedup/{sample}_MappedOn_{refbase}_dedup_sort.bam.{bamidx}",

sample = sample,

refbase = refbase,

bamidx = bamidx),

# bamCoverage

expand("mapped/dedup/{sample}_MappedOn_{refbase}_dedup_sort.bw",

sample = sample,

refbase = refbase),

# methylation_extractor

expand("methylation_extracted/CpG_context_{sample}_MappedOn_{refbase}_dedup.txt.gz",

sample = sample,

refbase = refbase),

expand("methylation_extracted/CHG_context_{sample}_MappedOn_{refbase}_dedup.txt.gz",

sample = sample,

refbase = refbase),

expand("methylation_extracted/CHH_context_{sample}_MappedOn_{refbase}_dedup.txt.gz",

sample = sample,

refbase = refbase),

# bismark2bedGraph

expand("coverage/{sample}_MappedOn_{refbase}_dedup_{context}",

sample = sample,

refbase = refbase,

context = context),

expand("coverage/{sample}_MappedOn_{refbase}_dedup_{context}.gz.bismark.cov",

sample = sample,

refbase = refbase,

context = context),

# bedGraphToBigWig

expand("coverage/bw/{sample}_MappedOn_{refbase}_dedup_{context}.bw",

sample = sample,

refbase = refbase,

context = context),

# coverage2cytosine

expand("coverage/report/{sample}_MappedOn_{refbase}_dedup_{context}.CX_report.txt.gz",

sample = sample,

refbase = refbase,

context = context)

# Run fastqc on R1 and R2 raw data

rule fastqc_raw:

"""Create fastqc reports for raw R1 and R2"""

input:

"data/{sample}_{mate}.fastq.gz"

output:

html = "logs/fastqc/raw/{sample}_{mate}_fastqc.html",

zip = "logs/fastqc/raw/{sample}_{mate}_fastqc.zip"

params:

" --extract"

log:

"logs/fastqc/raw/{sample}_{mate}.log"

wrapper:

"0.38.0/bio/fastqc"

# Trim off adapters and low-quality bases

rule trim_galore:

"""Remove adapters and low-quality bases"""

input:

r1 = "data/{sample}_" + mate[0] + ".fastq.gz",

r2 = "data/{sample}_" + mate[1] + ".fastq.gz"

output:

r1 = "trimmed/{sample}_" + mate[0] + "_trimmed.fastq.gz",

r2 = "trimmed/{sample}_" + mate[1] + "_trimmed.fastq.gz"

threads: 4

params:

" --clip_R1 " + str(config["TRIM"]["R1_5prime_cut"]) +

" --clip_R2 " + str(config["TRIM"]["R2_5prime_cut"])

log:

std = "logs/trim_galore/{sample}_trimmed.log",

r1 = "{sample}_" + mate[0] + ".fastq.gz_trimming_report.txt",

r2 = "{sample}_" + mate[1] + ".fastq.gz_trimming_report.txt"

shell:

"(trim_galore"

" --paired"

" --cores {threads}"

" --output_dir trimmed"

" {params}"

" {input.r1} {input.r2} ) &> {log.std}; "

"rename 's/val_[12].fq.gz/trimmed.fastq.gz/g' trimmed/{wildcards.sample}* ; "

"mv trimmed/{log.r1} logs/trim_galore/ ; "

"mv trimmed/{log.r2} logs/trim_galore/"

# Run fastqc on R1 and R2 trimmed data

rule fastqc_trimmed:

"""Create fastqc reports for trimmed R1 and R2"""

input:

"trimmed/{sample}_{mate}_trimmed.fastq.gz"

output:

html = "logs/fastqc/trimmed/{sample}_{mate}_trimmed_fastqc.html",

zip = "logs/fastqc/trimmed/{sample}_{mate}_trimmed_fastqc.zip"

params:

" --extract"

log:

"logs/fastqc/trimmed/{sample}_{mate}_trimmed.log"

wrapper:

"0.38.0/bio/fastqc"

# Align to reference genome and call methylated cytosines

rule bismark:

"""Map reads using bismark and call methylated cytosines"""

input:

r1 = "trimmed/{sample}_" + mate[0] + "_trimmed.fastq.gz",

r2 = "trimmed/{sample}_" + mate[1] + "_trimmed.fastq.gz"

output:

protected("mapped/{sample}_MappedOn_{refbase}.bam")

threads: 8

params:

extra = config["MAPPING"]["extra_params_bismark"]

log:

std = "logs/bismark/{sample}_MappedOn_{refbase}.log",

rep = "logs/bismark/{sample}_MappedOn_{refbase}_report.txt",

nuc = "logs/bismark/{sample}_MappedOn_{refbase}.nucleotide_stats.txt"

shell:

# USAGE: bismark [options] <genome_folder> {-1 <mates1> -2 <mates2> | <singles>}

"(bismark"

" --bowtie2"

" --multicore {threads}"

" --nucleotide_coverage"

# "Please note that the option -B/--basename in conjunction with --multicore is

# currently not supported (as in: disabled), but we are aiming to address this soon"

# https://www.bioinformatics.babraham.ac.uk/projects/bismark/

# " --basename {wildcards.sample}_MappedOn_{refbase}"

# " --prefix {wildcards.sample}_MappedOn_{refbase}"

" --output_dir mapped"

" {params.extra}"

" {reference}"

" -1 {input.r1} -2 {input.r2} ) &> {log.std}; "

"mv mapped/{wildcards.sample}_R1_trimmed_bismark_bt2_pe.bam {output} ; "

"mv mapped/{wildcards.sample}_R1_trimmed_bismark_bt2_PE_report.txt {log.rep} ; "

"mv mapped/{wildcards.sample}_R1_trimmed_bismark_bt2_pe.nucleotide_stats.txt {log.nuc}"

# Remove duplicate alignments

## CHANGE NOTE: moved samtools sort to this

rule deduplicate_bismark:

"""Remove duplicate paired-end read alignments from the Bismark mapping output"""

# "*** Please note that for paired-end BAM files the deduplication script expects Read1 and Read2 to

# follow each other in consecutive lines! If the file has been sorted by position make sure that you resort it

# by read name first (e.g. using samtools sort -n) ***"

input:

"mapped/{sample}_MappedOn_{refbase}.bam"

output:

dedup = "mapped/dedup/{sample}_MappedOn_{refbase}_dedup.bam",

sort = "mapped/dedup/{sample}_MappedOn_{refbase}_dedup_sort.bam"

params:

sortMemory = config["MAPPING"]["sortMemory"]

threads: config["THREADS"]

log:

std = "logs/deduplicate_bismark/{sample}_MappedOn_{refbase}_dedup.log",

rep = "logs/deduplicate_bismark/{sample}_MappedOn_{refbase}_dedup_report.txt"

shell:

# USAGE: deduplicate_bismark [options] <filename(s)>

"(deduplicate_bismark"

" --paired"

" --output_dir mapped/dedup"

" --bam"

" {input} ) &> {log.std}; "

"mv mapped/dedup/{wildcards.sample}_MappedOn_{refbase}.deduplicated.bam {output.dedup} ; "

"mv mapped/dedup/{wildcards.sample}_MappedOn_{refbase}.deduplication_report.txt {log.rep} ; "

"samtools sort -@ {threads} -m {params.sortMemory} -o {output.sort} {output.dedup}"

# Index deduplicated Bismark mapping output and generate coverage bigWig

# Index format (bai or csi) depends on chromosome sizes

## CHANGE NOTE: bai or csi BAM indexing

if bamidx == "bai":

rule samtools:

"""bai-index deduplicated Bismark mapping output"""

input:

"mapped/dedup/{sample}_MappedOn_{refbase}_dedup_sort.bam"

output:

"mapped/dedup/{sample}_MappedOn_{refbase}_dedup_sort.bam.{bamidx}"

shell:

"samtools index {input}"

rule bamCoverage:

"""Calculate coverage in bigWig (bw) format"""

input:

BAM = "mapped/dedup/{sample}_MappedOn_{refbase}_dedup_sort.bam",

BAMidx = "mapped/dedup/{sample}_MappedOn_{refbase}_dedup_sort.bam.bai"

output:

BW = "mapped/dedup/{sample}_MappedOn_{refbase}_dedup_sort.bw"

params:

binSize = config["COVERAGE"]["binSize"]

threads: config["THREADS"]

log:

"logs/bamCoverage/{sample}_MappedOn_{refbase}_dedup_sort_bw.log"

shell:

"(bamCoverage -b {input.BAM} -o {output.BW}"

" --extendReads"

" --binSize {params.binSize} -p {threads} ) &> {log}"

else:

rule samtools:

"""csi-index deduplicated Bismark mapping output"""

input:

"mapped/dedup/{sample}_MappedOn_{refbase}_dedup_sort.bam"

output:

"mapped/dedup/{sample}_MappedOn_{refbase}_dedup_sort.bam.{bamidx}"

shell:

"samtools index -c -m 14 {input}"

rule bamCoverage:

"""Calculate coverage in bigWig (bw) format"""

input:

BAM = "mapped/dedup/{sample}_MappedOn_{refbase}_dedup_sort.bam",

BAMidx = "mapped/dedup/{sample}_MappedOn_{refbase}_dedup_sort.bam.csi"

output:

BW = "mapped/dedup/{sample}_MappedOn_{refbase}_dedup_sort.bw"

params:

binSize = config["COVERAGE"]["binSize"]

threads: config["THREADS"]

log:

"logs/bamCoverage/{sample}_MappedOn_{refbase}_dedup_sort_bw.log"

shell:

"(bamCoverage -b {input.BAM} -o {output.BW}"

" --extendReads"

" --binSize {params.binSize} -p {threads} ) &> {log}"

# Extract the methylation call for each cytosine analysed

# and output in context-specific files

## CHANGE NOTE: BAM must be unsorted, with the second read in a pair following the first

## CHANGE NOTE: Removed -s option (specifies that data is single-end)

rule methylation_extractor:

"""Extract the methylation call for each cytosine analysed in context-specific manner"""

input:

"mapped/dedup/{sample}_MappedOn_{refbase}_dedup.bam"

output:

CpG = "methylation_extracted/CpG_context_{sample}_MappedOn_{refbase}_dedup.txt.gz",

CHG = "methylation_extracted/CHG_context_{sample}_MappedOn_{refbase}_dedup.txt.gz",

CHH = "methylation_extracted/CHH_context_{sample}_MappedOn_{refbase}_dedup.txt.gz"

# "Please note that a typical process of extracting a BAM file and writing out '.gz'

# output streams will in fact use ~3 cores per value of --parallel <int> specified

# (1 for the methylation extractor itself, 1 for a Samtools stream, 1 for GZIP stream),

# so --parallel 10 is likely to use around 30 cores of system resources."

threads: 10

log:

"logs/methylation_extractor/{sample}_MappedOn_{refbase}_dedup_methylation_extractor.log"

shell:

# USAGE: bismark_methylation_extractor [options] <filenames>

# NOTE: Not including --bedgraph option as the file naming conventions are not ideal;

# bedGraphs will be generated by the stand-alone Bismark script bismark2bedGraph

# in subsequent rule

"(bismark_methylation_extractor"

" --paired-end"

" --comprehensive"

" --output methylation_extracted"

" --gzip"

" --parallel {threads}"

" {input} ) &> {log}"

# Generate bedGraph and coverage files sorted by chromosomal coordinate

# NOTE: gzipped outfiles must be gunzipped for downstream use

## CHANGE NOTE: added "--keep" option to gunzip commands so that gzipped files will be kept

## Considered redirecting stdout of gunzip to {output.bedGraph}.bedGraph,

## but this would prevent use of temp() to remove uncompressed output files after use

rule bismark2bedGraph:

"""Generate bedGraph and coverage files sorted by chromosomal coordinate"""

input:

"methylation_extracted/{context}_context_{sample}_MappedOn_{refbase}_dedup.txt.gz"

output:

bedGraph = temp("coverage/{sample}_MappedOn_{refbase}_dedup_{context}"),

cov = temp("coverage/{sample}_MappedOn_{refbase}_dedup_{context}.gz.bismark.cov")

params:

# config.yaml specifies --ample_memory OR --buffer_size 50%

# See config.yaml for best option to use for given samples

sortMemory = config["BEDGRAPH"]["sortMemory"]

log:

"logs/bismark2bedGraph/{sample}_MappedOn_{refbase}_dedup_{context}_bismark2bedGraph.log"

shell:

# USAGE: bismark2bedGraph [options] -o <output> [methylation extractor input files]

"(bismark2bedGraph"

" --dir coverage"

" --CX_context"

" {params.sortMemory}"

" -o {wildcards.sample}_MappedOn_{refbase}_dedup_{wildcards.context} "

" {input} ) &> {log} ; "

"gunzip --keep {output.bedGraph}.gz; "

"gunzip --keep {output.cov}.gz"

# Convert bedGraph into bigWig format for IGV and for use with

# deepTools computeMatrix function (in a separate Snakemake workflow),

# to create a matrix of DNA methylation proportion profiles around features

# NOTE: chromosome sizes file ("data/index/wheat_v1.0_incl_organelles_controls.fa.sizes") must exist

# before running snakemake; e.g., in "data/index/" run:

# samtools faidx wheat_v1.0_incl_organelles_controls.fa;

# cut -f1,2 wheat_v1.0_incl_organelles_controls.fa.fai > wheat_v1.0_incl_organelles_controls.fa.sizes

## CHANGE NOTE: changed {reference}/{refbase}.fa.fai to {reference}/{refbase}.fa.sizes

rule bedGraphToBigWig:

"""Convert bedGraph into bigWig format"""

input:

"coverage/{sample}_MappedOn_{refbase}_dedup_{context}"

output:

"coverage/bw/{sample}_MappedOn_{refbase}_dedup_{context}.bw"

log:

"logs/bedGraphToBigWig/{sample}_MappedOn_{refbase}_dedup_{context}_bedGraphToBigWig.log"

shell:

# USAGE: bedGraphToBigWig in.bedGraph chrom.sizes out.bw

# where in.bedGraph is a four-column file in the format:

# <chrom> <start> <end> <value>

# and chrom.sizes is a two-column file/URL: <chromosome name> <size in bases>

# and out.bw is the output indexed big wig file.

# The input bedGraph file must be sorted, use the unix sort command:

"(sed '1d' {input} | LC_COLLATE=C sort -k1,1 -k2,2n > {input}_sorted ; "

"bedGraphToBigWig {input}_sorted {reference}/{refbase}.fa.sizes {output} ; "

"rm {input}_sorted ) &> {log}"

# Generate a cytosine methylation report for a genome of interest

## CHANGE NOTE: wrong input file specified; this should be

## coverage/{sample}_MappedOn_{refbase}_dedup_{context}.gz.bismark.cov or

## coverage/{sample}_MappedOn_{refbase}_dedup_{context}.gz.bismark.cov.gz

rule coverage2cytosine:

"""Generate a cytosine methylation report for a genome of interest"""

input:

"coverage/{sample}_MappedOn_{refbase}_dedup_{context}.gz.bismark.cov"

output:

"coverage/report/{sample}_MappedOn_{refbase}_dedup_{context}.CX_report.txt.gz"

log:

"logs/coverage2cytosine/{sample}_MappedOn_{refbase}_dedup_{context}_coverage2cytosine.log"

shell:

# USAGE: coverage2cytosine [options] --genome_folder <path> -o <output> [input]

# "The input file needs to have been generated with the script bismark2bedGraph (the file is called *.cov, or .cov.gz) or

# otherwise be sorted by position and exactly in the following format:

# <chromosome> <start position> <end position> <methylation percentage> <count methylated> <count unmethylated>

# The coordinates of the input file are expected to be 1-based throughout (do not use files ending in .zero.cov!)."

"(coverage2cytosine"

" --dir coverage/report"

" --CX_context"

" --gzip"

" --genome_folder {cwd}{reference}"

" -o {wildcards.sample}_MappedOn_{refbase}_dedup_{wildcards.context}"

" {input} ) &> {log}"

**RNA-seq data processing and alignment workflow**

This is a Snakemake workflow for automated processing and alignment of paired-end RNA-seq data.

Requirements:

- Installation of Snakemake and optionally conda
- Demultiplexed paired-end reads in gzipped FASTQ format located in the data/ directory. These should be named according to the following naming convention: {sample}_R1.fastq.gz and {sample}_R2.fastq.gz
- A samtools-indexed reference genome in FASTA format and a chromosome sizes file (e.g., wheat_v1.0.fa, wheat_v1.0.fa.fai, and wheat_v1.0.fa.sizes, the latter two of which generated with samtools faidx wheat_v1.0.fa; cut -f1,2 wheat_v1.0.fa.fai > wheat_v1.0.fa.sizes), each located in data/index/
- Gene annotations in GTF format (e.g., IWGSC_v1.1_HC_20170706.gtf) and a reference genome index with exon and splice site annotations for hisat2, each located in data/index/ (see data/index/hisat2_genome_index.sh for an example of how to generate these). The IWGSC RefSeq v1.0 Chinese Spring genome assembly and the IWGSC RefSeq v1.1 gene annotation were used in this case
- Lists of potential contaminant sequences to be removed, located in contaminants/, provided or described in this repository
- Snakefile in this repository. This contains "rules" that each execute a step in the workflow
- config.yaml in this repository. This contains customizable parameters including reference, which should be the reference genome file name without the .fa extension (e.g., wheat_v1.0)
- Optional: environment.yaml in this repository, used to create the software environment if conda is used
- If conda is not used, the tools listed in environment.yaml must be specified in the PATH variable

Creating the conda environment:

conda env create --file environment.yaml --name RNAseq_mapping

Usage:

In a Unix shell, navigate to the base directory containing Snakefile, config.yaml, environment.yaml, and the data\ subdirectory, which should have a directory tree structure like this:

.

├── config.yaml

├── contaminants

│   ├── cat_all_and_TruSeq_Single_Indexes.fa

│   ├── contaminants_list_fastqc.txt

│   ├── ribokmers.fa.gz

│   └── ribokmers_README.txt

├── data

│   ├── index

│   │   ├── hisat2_genome_index.sh

│   │   ├── IWGSC_v1.1_HC_20170706.exon

│   │   ├── IWGSC_v1.1_HC_20170706.gtf

│   │   ├── IWGSC_v1.1_HC_20170706.ss

│   │   ├── samtools_faidx_chr_sizes.sh

│   │   ├── wheat_v1.0.1.ht2l

│   │   ├── wheat_v1.0.2.ht2l

│   │   ├── wheat_v1.0.3.ht2l

│   │   ├── wheat_v1.0.4.ht2l

│   │   ├── wheat_v1.0.5.ht2l

│   │   ├── wheat_v1.0.6.ht2l

│   │   ├── wheat_v1.0.7.ht2l

│   │   ├── wheat_v1.0.8.ht2l

│   │   ├── wheat_v1.0.fa

│   │   ├── wheat_v1.0.fa.fai

│   │   └── wheat_v1.0.fa.sizes

│   ├── WT_RNAseq_Rep1_ERR2402974_R1.fastq.gz

│   ├── WT_RNAseq_Rep1_ERR2402974_R2.fastq.gz

│   ├── WT_RNAseq_Rep2_ERR2402973_R1.fastq.gz

│   ├── WT_RNAseq_Rep2_ERR2402973_R2.fastq.gz

│   ├── WT_RNAseq_Rep3_ERR2402972_R1.fastq.gz

│   └── WT_RNAseq_Rep3_ERR2402972_R2.fastq.gz

├── environment.yaml

├── README.md

├── scripts

│   └── keepPaired.py

└── Snakefile

Then run the following commands in the base directory (--cores should match the THREADS parameter in config.yaml):

conda activate RNAseq_mapping

snakemake -p --cores 48

conda deactivate

Script: environment.yaml:

channels:

- bioconda

dependencies:

- fastqc=0.11.8

- bbmap=38.22

- trimmomatic=0.38

- pigz=2.3.4

- hisat2=2.1.0

- samtools=1.9

- deeptools=3.1.3

Script: config.yaml:

SAMPLES: [

"WT_RNAseq_Rep1_ERR2402974",

"WT_RNAseq_Rep2_ERR2402973",

"WT_RNAseq_Rep3_ERR2402972"

]

THREADS: 48

MEMORY: "250g"

FILTER:

fastqc:

contaminants: "contaminants/contaminants_list_fastqc.txt"

bbduk:

kmerSize: 18

rRNAfasta: "contaminants/ribokmers.fa.gz"

trimmomatic:

ILLUMINACLIP: "ILLUMINACLIP:contaminants/cat_all_and_TruSeq_Single_Indexes.fa:2:30:10:1:true"

HEADCROP: "HEADCROP:10"

LEADING: "LEADING:3"

TRAILING: "TRAILING:3"

SLIDINGWINDOW: "SLIDINGWINDOW:4:20"

MINLEN: "MINLEN:80"

MAPPING:

reference: "data/index/wheat_v1.0"

spliceSites: "data/index/IWGSC_v1.1_HC_20170706"

alignments: 5

MAPQboth: 1

MAPQunique: 60

sortMemory: "4G"

COVERAGE:

normalizeUsing: "BPM"

ignoreForNormalization: "chrUn" # Reference genome-specific parameter

binSize: 1

genomeBinSize: 1000000

genomeBinName: "1Mb"

Script: Snakefile:

# Snakemake workflow for aligning paired-end RNA-seq reads to a reference genome

# Chromosome sizes file below ("data/index/wheat_v1.0.fa.sizes") must exist

# before running snakemake

# e.g., in "data/index/" run:

# samtools faidx wheat_v1.0.fa; cut -f1,2 wheat_v1.0.fa.fai > wheat_v1.0.fa.sizes

# Usage ("--cores" should match the "THREADS" parameter in config.yaml, and reflect available threads):

# conda env create --file environment.yaml --name RNAseq_mapping # On first use only

# conda activate RNAseq_mapping

# snakemake -p --cores 48

# conda deactivate

import pandas as pd

import os

# To make the samtools rule work with a shell script ("scripts/keepPaired.py") invoked using the "shell" directive,

# we need to determine the base path of Snakefile since we expect the "scripts/" subdirectory to be located here

SRCDIR = srcdir("")

# Specify config file parameters

configfile: "config.yaml"

sample = config["SAMPLES"]

reference = config["MAPPING"]["reference"]

refbase = os.path.basename(reference)

genomeBinName = config["COVERAGE"]["genomeBinName"]

# Determine bam index format (bai or csi) based on chromosome sizes

# Genomes with chromosomes longer than ~500 Mb (e.g., in wheat) require a csi index

# E.g., in axolotl: https://sourceforge.net/p/samtools/mailman/message/36249039/

chrSizes = pd.read_table("data/index/" + refbase + ".fa.sizes",

header = None)

smallChrs = 0

for x in chrSizes[1]:

if x < 5e+08:

smallChrs = smallChrs + 1

if smallChrs < len(chrSizes[1]):

bamidx = "csi"

else:

bamidx = "bai"

ruleorder: fastqc_R1_raw > fastqc_R2_raw > bbduk > trimmomatic > fastqc_R1_trimmed > fastqc_R2_trimmed > hisat2 > samtools > postmapping > calc_coverage > calc_coverage_genome

# Specify the desired end target file(s)

rule all:

input:

expand("logs/fastqc/raw/{sample}_R1_fastqc.html",

sample = sample),

expand("logs/fastqc/raw/{sample}_R2_fastqc.html",

sample = sample),

expand("data/{sample}_R1_rRNAremoved.fastq.gz",

sample = sample),

expand("data/{sample}_R2_rRNAremoved.fastq.gz",

sample = sample),

expand("data/trimmed/{sample}_R1_rRNAremoved_trimmed.fastq.gz",

sample = sample),

expand("data/trimmed/{sample}_R2_rRNAremoved_trimmed.fastq.gz",

sample = sample),

expand("logs/fastqc/trimmed/{sample}_R1_rRNAremoved_trimmed_fastqc.html",

sample = sample),

expand("logs/fastqc/trimmed/{sample}_R2_rRNAremoved_trimmed_fastqc.html",

sample = sample),

expand("mapped/{sample}_MappedOn_{refbase}.bam",

sample = sample,

refbase = refbase),

expand("mapped/both/{sample}_MappedOn_{refbase}_both_sort.bam",

sample = sample,

refbase = refbase),

expand("mapped/unique/{sample}_MappedOn_{refbase}_unique_sort.bam",

sample = sample,

refbase = refbase),

expand("mapped/unique/{sample}_MappedOn_{refbase}_unique_sort.bam.{bamidx}",

sample = sample,

refbase = refbase,

bamidx = bamidx),

expand("mapped/unique/bw/{sample}_MappedOn_{refbase}_unique_sort_norm.bw",

sample = sample,

refbase = refbase),

expand("mapped/unique/bg/{sample}_MappedOn_{refbase}_unique_sort_norm.bedgraph",

sample = sample,

refbase = refbase),

expand("mapped/unique/bg/{sample}_MappedOn_{refbase}_unique_sort_norm_binSize{genomeBinName}.bedgraph",

sample = sample,

refbase = refbase,

genomeBinName = genomeBinName),

expand("mapped/both/{sample}_MappedOn_{refbase}_both_sort.bam.{bamidx}",

sample = sample,

refbase = refbase,

bamidx = bamidx),

expand("mapped/both/bw/{sample}_MappedOn_{refbase}_both_sort_norm.bw",

sample = sample,

refbase = refbase),

expand("mapped/both/bg/{sample}_MappedOn_{refbase}_both_sort_norm.bedgraph",

sample = sample,

refbase = refbase),

expand("mapped/both/bg/{sample}_MappedOn_{refbase}_both_sort_norm_binSize{genomeBinName}.bedgraph",

sample = sample,

refbase = refbase,

genomeBinName = genomeBinName)

# Run fastqc on R1 raw data

rule fastqc_R1_raw:

"""Create fastqc report"""

input:

"data/{sample}_R1.fastq.gz"

output:

html = "logs/fastqc/raw/{sample}_R1_fastqc.html",

zip = "logs/fastqc/raw/{sample}_R1_fastqc.zip"

params:

" --extract" +

" --adapters " + str(config["FILTER"]["fastqc"]["contaminants"])

log:

"logs/fastqc/raw/{sample}_R1.log"

wrapper:

"0.31.1/bio/fastqc"

# Run fastqc on R2 raw data

rule fastqc_R2_raw:

"""Create fastqc report"""

input:

"data/{sample}_R2.fastq.gz"

output:

html = "logs/fastqc/raw/{sample}_R2_fastqc.html",

zip = "logs/fastqc/raw/{sample}_R2_fastqc.zip"

params:

" --extract" +

" --adapters " + str(config["FILTER"]["fastqc"]["contaminants"])

log:

"logs/fastqc/raw/{sample}_R2.log"

wrapper:

"0.31.1/bio/fastqc"

# Remove rRNA

rule bbduk:

"""Remove rRNA"""

input:

r1 = "data/{sample}_R1.fastq.gz",

r2 = "data/{sample}_R2.fastq.gz"

output:

r1rRNA = "data/{sample}_R1_rRNA.fastq.gz",

r1nonrRNA = "data/{sample}_R1_rRNAremoved.fastq.gz",

r2rRNA = "data/{sample}_R2_rRNA.fastq.gz",

r2nonrRNA = "data/{sample}_R2_rRNAremoved.fastq.gz"

threads: config["THREADS"]

params:

memory = config["MEMORY"],

kmerSize = config["FILTER"]["bbduk"]["kmerSize"],

rRNAfasta = config["FILTER"]["bbduk"]["rRNAfasta"]

log:

"logs/bbduk/{sample}_rRNAremoved.log"

shell:

"(bbduk.sh -Xmx{params.memory}"

" in={input.r1}"

" in2={input.r2}"

" outmatch={output.r1rRNA}"

" outmatch2={output.r2rRNA}"

" outnonmatch={output.r1nonrRNA}"

" outnonmatch2={output.r2nonrRNA}"

" k={params.kmerSize}"

" ref={params.rRNAfasta}"

" threads={threads}) &> {log}"

# Trim off adapters and low-quality bases

rule trimmomatic:

"""Remove adapters and low-quality bases"""

input:

r1 = "data/{sample}_R1_rRNAremoved.fastq.gz",

r2 = "data/{sample}_R2_rRNAremoved.fastq.gz"

output:

r1 = "data/trimmed/{sample}_R1_rRNAremoved_trimmed.fastq.gz",

r2 = "data/trimmed/{sample}_R2_rRNAremoved_trimmed.fastq.gz",

# Reads where trimming entirely removed the mate

r1_unpaired = "data/trimmed/{sample}_R1_rRNAremoved_trimmed_unpaired.fastq.gz",

r2_unpaired = "data/trimmed/{sample}_R2_rRNAremoved_trimmed_unpaired.fastq.gz"

threads: config["THREADS"]

params:

# List of trimming paramters (see Trimmomatic manual)

trimmer = [str(config["FILTER"]["trimmomatic"]["ILLUMINACLIP"]),

str(config["FILTER"]["trimmomatic"]["HEADCROP"]),

str(config["FILTER"]["trimmomatic"]["LEADING"]),

str(config["FILTER"]["trimmomatic"]["TRAILING"]),

str(config["FILTER"]["trimmomatic"]["SLIDINGWINDOW"]),

str(config["FILTER"]["trimmomatic"]["MINLEN"])]

log:

"logs/trimmomatic/{sample}_rRNAremoved_trimmed.log"

shell:

"(trimmomatic PE -threads {threads}"

" {input.r1} {input.r2}"

" {output.r1} {output.r1_unpaired}"

" {output.r2} {output.r2_unpaired}"

" {params.trimmer}) &> {log}"

# Run fastqc on R1 rRNAremoved_trimmed data

rule fastqc_R1_trimmed:

"""Create fastqc report"""

input:

"data/trimmed/{sample}_R1_rRNAremoved_trimmed.fastq.gz"

output:

html = "logs/fastqc/trimmed/{sample}_R1_rRNAremoved_trimmed_fastqc.html",

zip = "logs/fastqc/trimmed/{sample}_R1_rRNAremoved_trimmed_fastqc.zip"

params:

" --extract" +

" --adapters " + str(config["FILTER"]["fastqc"]["contaminants"])

log:

"logs/fastqc/trimmed/{sample}_R1_rRNAremoved_trimmed.log"

wrapper:

"0.31.1/bio/fastqc"

# Run fastqc on R2 rRNAremoved_trimmed data

rule fastqc_R2_trimmed:

"""Create fastqc report"""

input:

"data/trimmed/{sample}_R2_rRNAremoved_trimmed.fastq.gz"

output:

html = "logs/fastqc/trimmed/{sample}_R2_rRNAremoved_trimmed_fastqc.html",

zip = "logs/fastqc/trimmed/{sample}_R2_rRNAremoved_trimmed_fastqc.zip"

params:

" --extract" +

" --adapters " + str(config["FILTER"]["fastqc"]["contaminants"])

log:

"logs/fastqc/trimmed/{sample}_R2_rRNAremoved_trimmed.log"

wrapper:

"0.31.1/bio/fastqc"

# Align to the reference genome

rule hisat2:

"""Obtain unique and multiple alignments using hisat2"""

input:

fastq1 = "data/trimmed/{sample}_R1_rRNAremoved_trimmed.fastq.gz",

fastq2 = "data/trimmed/{sample}_R2_rRNAremoved_trimmed.fastq.gz"

output:

protected("mapped/{sample}_MappedOn_{refbase}.bam")

params:

alignments = config["MAPPING"]["alignments"],

MAPQboth = config["MAPPING"]["MAPQboth"],

spliceSites = config["MAPPING"]["spliceSites"]

threads: config["THREADS"]

log:

"logs/hisat2/{sample}_MappedOn_{refbase}.log"

shell:

# USAGE:

# hisat2 [options]* -x <ht2-idx> {-1 <m1> -2 <m2> | -U <r> | --sra-acc <SRA accession number>} [-S <sam>]

# -f 3 includes only concordantly aligned read pairs, and not unpaired reads

# -F 2316 excludes unmapped reads (their mates too),

# as well as secondary and supplementary alignments

# Exclude alignments with MAPQ < config["MAPPING"]["MAPQboth"]

"(hisat2"

" -k {params.alignments}"

" --no-mixed"

" --no-discordant"

" --no-unal"

" --rna-strandness RF"

" --known-splicesite-infile {params.spliceSites}.ss"

" --novel-splicesite-outfile {params.spliceSites}.nss"

" --novel-splicesite-infile {params.spliceSites}.nss"

" --threads {threads}"

" -x {reference}"

" -1 {input.fastq1} -2 {input.fastq2} "

"| samtools view -bh -@ {threads} -f 3 -F 2316 -q {params.MAPQboth} -o {output} - ) &> {log}"

# Filter alignments for mismatches and extract unique alignments

rule samtools:

"""Filter alignments for mismatches and extract unique alignments"""

input:

"mapped/{sample}_MappedOn_{refbase}.bam"

output:

both = protected("mapped/both/{sample}_MappedOn_{refbase}_both_sort.bam"),

unique = protected("mapped/unique/{sample}_MappedOn_{refbase}_unique_sort.bam")

params:

sortMemory = config["MAPPING"]["sortMemory"],

MAPQunique = config["MAPPING"]["MAPQunique"]

threads: config["THREADS"]

log:

both = "logs/samtools/{sample}_MappedOn_{refbase}_both_sort.log",

unique = "logs/samtools/{sample}_MappedOn_{refbase}_unique_sort.log"

shell:

# Allow a maximum of 6 mismatches

# ([^0-9] matches characters not in the range of 0 to 9)

# http://seqanswers.com/forums/showthread.php?t=19729

"(samtools view -h {input} "

"| grep -e '^@' -e 'XM:i:[0-6][^0-9]' "

# Retain alignments for which the names of both reads in a pair are the same

"| scripts/keepPaired.py "

"| samtools view -u - "

"| samtools sort -@ {threads} -m {params.sortMemory} -o {output.both}) &> {log.both}; "

# Extract unique alignments, excluding alignments with MAPQ scores < config["MAPPING"]["MAPQunique"]

# https://sequencing.qcfail.com/articles/mapq-values-are-really-useful-but-their-implementation-is-a-mess/

"(samtools view -h -q {params.MAPQunique} {input} "

"| grep -e '^@' -e 'XM:i:[0-6][^0-9]' "

# Retain alignments for which the names of both reads in a pair are the same

"| scripts/keepPaired.py "

"| samtools view -u - "

"| samtools sort -@ {threads} -m {params.sortMemory} -o {output.unique}) &> {log.unique}"

# Postmapping steps:

# Index BAM files (index format [bai or csi] depends on chromosome sizes)

# Generate samtools flagstat and idxstats

# Calculate library-size-normalised coverage

if bamidx == "bai":

rule postmapping:

"""bam.bai samtools flagstat idxstats"""

input:

uniqueBAM = "mapped/unique/{sample}_MappedOn_{refbase}_unique_sort.bam",

bothBAM = "mapped/both/{sample}_MappedOn_{refbase}_both_sort.bam"

output:

uniqueBAM = "mapped/unique/{sample}_MappedOn_{refbase}_unique_sort.bam.{bamidx}",

bothBAM = "mapped/both/{sample}_MappedOn_{refbase}_both_sort.bam.{bamidx}"

log:

uniqueflagstat = "logs/samtools/stats/{sample}_MappedOn_{refbase}_unique_sort_flagstat.log",

bothflagstat = "logs/samtools/stats/{sample}_MappedOn_{refbase}_both_sort_flagstat.log",

uniqueidxstats = "logs/samtools/stats/{sample}_MappedOn_{refbase}_unique_sort_idxstats.log",

bothidxstats = "logs/samtools/stats/{sample}_MappedOn_{refbase}_both_sort_idxstats.log"

shell:

"""

samtools index {input.uniqueBAM}

samtools flagstat {input.uniqueBAM} > {log.uniqueflagstat}

samtools idxstats {input.uniqueBAM} > {log.uniqueidxstats}

samtools index {input.bothBAM}

samtools flagstat {input.bothBAM} > {log.bothflagstat}

samtools idxstats {input.bothBAM} > {log.bothidxstats}

"""

rule calc_coverage:

"""Calculate library-size-normalized coverage"""

input:

uniqueBAM = "mapped/unique/{sample}_MappedOn_{refbase}_unique_sort.bam",

bothBAM = "mapped/both/{sample}_MappedOn_{refbase}_both_sort.bam",

uniqueBAMidx = "mapped/unique/{sample}_MappedOn_{refbase}_unique_sort.bam.bai",

bothBAMidx = "mapped/both/{sample}_MappedOn_{refbase}_both_sort.bam.bai"

output:

uniqueBW = "mapped/unique/bw/{sample}_MappedOn_{refbase}_unique_sort_norm.bw",

bothBW = "mapped/both/bw/{sample}_MappedOn_{refbase}_both_sort_norm.bw",

uniqueBG = "mapped/unique/bg/{sample}_MappedOn_{refbase}_unique_sort_norm.bedgraph",

bothBG = "mapped/both/bg/{sample}_MappedOn_{refbase}_both_sort_norm.bedgraph"

params:

normalizeUsing = config["COVERAGE"]["normalizeUsing"],

binSize = config["COVERAGE"]["binSize"]

log:

unique = "logs/bamCoverage/{sample}_MappedOn_{refbase}_unique_sort_norm.log",

both = "logs/bamCoverage/{sample}_MappedOn_{refbase}_both_sort_norm.log"

threads: config["THREADS"]

shell:

"(bamCoverage -b {input.uniqueBAM} -o {output.uniqueBW}"

" --normalizeUsing {params.normalizeUsing}"

" --binSize {params.binSize} -p {threads}; "

"bamCoverage -b {input.uniqueBAM} -o {output.uniqueBG} -of bedgraph"

" --normalizeUsing {params.normalizeUsing}"

" --binSize {params.binSize} -p {threads}) &> {log.unique}; "

"(bamCoverage -b {input.bothBAM} -o {output.bothBW}"

" --normalizeUsing {params.normalizeUsing}"

" --binSize {params.binSize} -p {threads}; "

"bamCoverage -b {input.bothBAM} -o {output.bothBG} -of bedgraph"

" --normalizeUsing {params.normalizeUsing}"

" --binSize {params.binSize} -p {threads}) &> {log.both}"

rule calc_coverage_genome:

"""Calculate library-size-normalized coverage in adjacent windows"""

input:

uniqueBAM = "mapped/unique/{sample}_MappedOn_{refbase}_unique_sort.bam",

bothBAM = "mapped/both/{sample}_MappedOn_{refbase}_both_sort.bam",

uniqueBAMidx = "mapped/unique/{sample}_MappedOn_{refbase}_unique_sort.bam.bai",

bothBAMidx = "mapped/both/{sample}_MappedOn_{refbase}_both_sort.bam.bai"

output:

uniqueBGgenome = "mapped/unique/bg/{sample}_MappedOn_{refbase}_unique_sort_norm_binSize{genomeBinName}.bedgraph",

bothBGgenome = "mapped/both/bg/{sample}_MappedOn_{refbase}_both_sort_norm_binSize{genomeBinName}.bedgraph"

params:

normalizeUsing = config["COVERAGE"]["normalizeUsing"],

genomeBinSize = config["COVERAGE"]["genomeBinSize"]

log:

unique = "logs/bamCoverage/{sample}_MappedOn_{refbase}_unique_sort_norm_binSize{genomeBinName}.log",

both = "logs/bamCoverage/{sample}_MappedOn_{refbase}_both_sort_norm_binSize{genomeBinName}.log"

threads: config["THREADS"]

shell:

"(bamCoverage -b {input.uniqueBAM} -o {output.uniqueBGgenome} -of bedgraph"

" --normalizeUsing {params.normalizeUsing}"

" --binSize {params.genomeBinSize} -p {threads}) &> {log.unique}; "

"(bamCoverage -b {input.bothBAM} -o {output.bothBGgenome} -of bedgraph"

" --normalizeUsing {params.normalizeUsing}"

" --binSize {params.genomeBinSize} -p {threads}) &> {log.both}"

else:

rule postmapping:

"""bam.csi samtools flagstat idxstats"""

input:

uniqueBAM = "mapped/unique/{sample}_MappedOn_{refbase}_unique_sort.bam",

bothBAM = "mapped/both/{sample}_MappedOn_{refbase}_both_sort.bam"

output:

uniqueBAM = "mapped/unique/{sample}_MappedOn_{refbase}_unique_sort.bam.{bamidx}",

bothBAM = "mapped/both/{sample}_MappedOn_{refbase}_both_sort.bam.{bamidx}"

log:

uniqueflagstat = "logs/samtools/stats/{sample}_MappedOn_{refbase}_unique_sort_flagstat.log",

bothflagstat = "logs/samtools/stats/{sample}_MappedOn_{refbase}_both_sort_flagstat.log",

uniqueidxstats = "logs/samtools/stats/{sample}_MappedOn_{refbase}_unique_sort_idxstats.log",

bothidxstats = "logs/samtools/stats/{sample}_MappedOn_{refbase}_both_sort_idxstats.log"

shell:

"""

samtools index -c -m 14 {input.uniqueBAM}

samtools flagstat {input.uniqueBAM} > {log.uniqueflagstat}

samtools idxstats {input.uniqueBAM} > {log.uniqueidxstats}

samtools index -c -m 14 {input.bothBAM}

samtools flagstat {input.bothBAM} > {log.bothflagstat}

samtools idxstats {input.bothBAM} > {log.bothidxstats}

"""

rule calc_coverage:

"""Calculate library-size-normalized coverage"""

input:

uniqueBAM = "mapped/unique/{sample}_MappedOn_{refbase}_unique_sort.bam",

bothBAM = "mapped/both/{sample}_MappedOn_{refbase}_both_sort.bam",

uniqueBAMidx = "mapped/unique/{sample}_MappedOn_{refbase}_unique_sort.bam.csi",

bothBAMidx = "mapped/both/{sample}_MappedOn_{refbase}_both_sort.bam.csi"

output:

uniqueBW = "mapped/unique/bw/{sample}_MappedOn_{refbase}_unique_sort_norm.bw",

bothBW = "mapped/both/bw/{sample}_MappedOn_{refbase}_both_sort_norm.bw",

uniqueBG = "mapped/unique/bg/{sample}_MappedOn_{refbase}_unique_sort_norm.bedgraph",

bothBG = "mapped/both/bg/{sample}_MappedOn_{refbase}_both_sort_norm.bedgraph"

params:

normalizeUsing = config["COVERAGE"]["normalizeUsing"],

binSize = config["COVERAGE"]["binSize"]

log:

unique = "logs/bamCoverage/{sample}_MappedOn_{refbase}_unique_sort_norm.log",

both = "logs/bamCoverage/{sample}_MappedOn_{refbase}_both_sort_norm.log"

threads: config["THREADS"]

shell:

"(bamCoverage -b {input.uniqueBAM} -o {output.uniqueBW}"

" --normalizeUsing {params.normalizeUsing}"

" --binSize {params.binSize} -p {threads}; "

"bamCoverage -b {input.uniqueBAM} -o {output.uniqueBG} -of bedgraph"

" --normalizeUsing {params.normalizeUsing}"

" --binSize {params.binSize} -p {threads}) &> {log.unique}; "

"(bamCoverage -b {input.bothBAM} -o {output.bothBW}"

" --normalizeUsing {params.normalizeUsing}"

" --binSize {params.binSize} -p {threads}; "

"bamCoverage -b {input.bothBAM} -o {output.bothBG} -of bedgraph"

" --normalizeUsing {params.normalizeUsing}"

" --binSize {params.binSize} -p {threads}) &> {log.both}"

rule calc_coverage_genome:

"""Calculate library-size-normalized coverage in adjacent windows"""

input:

uniqueBAM = "mapped/unique/{sample}_MappedOn_{refbase}_unique_sort.bam",

bothBAM = "mapped/both/{sample}_MappedOn_{refbase}_both_sort.bam",

uniqueBAMidx = "mapped/unique/{sample}_MappedOn_{refbase}_unique_sort.bam.csi",

bothBAMidx = "mapped/both/{sample}_MappedOn_{refbase}_both_sort.bam.csi"

output:

uniqueBGgenome = "mapped/unique/bg/{sample}_MappedOn_{refbase}_unique_sort_norm_binSize{genomeBinName}.bedgraph",

bothBGgenome = "mapped/both/bg/{sample}_MappedOn_{refbase}_both_sort_norm_binSize{genomeBinName}.bedgraph"

params:

normalizeUsing = config["COVERAGE"]["normalizeUsing"],

genomeBinSize = config["COVERAGE"]["genomeBinSize"]

log:

unique = "logs/bamCoverage/{sample}_MappedOn_{refbase}_unique_sort_norm_binSize{genomeBinName}.log",

both = "logs/bamCoverage/{sample}_MappedOn_{refbase}_both_sort_norm_binSize{genomeBinName}.log"

threads: config["THREADS"]

shell:

"(bamCoverage -b {input.uniqueBAM} -o {output.uniqueBGgenome} -of bedgraph"

" --normalizeUsing {params.normalizeUsing}"

" --binSize {params.genomeBinSize} -p {threads}) &> {log.unique}; "

"(bamCoverage -b {input.bothBAM} -o {output.bothBGgenome} -of bedgraph"

" --normalizeUsing {params.normalizeUsing}"

" --binSize {params.genomeBinSize} -p {threads}) &> {log.both}"

**Chromosome profiles**

R scripts for calculating and plotting windowed library-size-normalized log2(ChIP/control) coverage, recombination rate (cM/Mb), and feature frequency along the wheat chromosomes are provided below.

Script: chrProfilePlot_log2ChIPcontrol_x2_cMMb_genes_step1Mb.R:

#!/applications/R/R-3.5.0/bin/Rscript

# Plot smoothed windowed library-size-normalized log2(ChIP/control) coverage,

# recombination rate (cM/Mb), and feature frequency along wheat chromosomes

# Change xblocks height to 46.0 in chrPartitionPlotCov2_feature2 function

# Usage:

# ./chrProfilePlot_log2ChIPcontrol_x2_cMMb_genes_step1Mb.R CENH3 CENH3_ChIP_SRR1686799 ASY1_CS ASY1_CS_Rep1_ChIP input input_SRR6350669 input input_SRR6350669 both 1Mb 1000000 15 dodgerblue darkgreen 200720 'chr3A,chr3B,chr3D'

#markChIPA <- "CENH3_ChIP_SRR1686799"

#libNameChIPA <- "CENH3"

#markChIPB <- "ASY1_CS"

#libNameChIPB <- "ASY1_CS_Rep1_ChIP"

#markControlA <- "input"

#libNameControlA <- "input_SRR6350669"

#markControlB <- "input"

#libNameControlB <- "input_SRR6350669"

#align <- "both"

#winName <- "1Mb"

#winSize <- 1000000

#N <- 15

#colourA <- "dodgerblue"

#colourB <- "darkgreen"

#date <- "200720"

#chrName <- unlist(strsplit("chr3A,chr3B,chr3D",

# split = ","))

args <- commandArgs(trailingOnly = T)

markChIPA <- args[1]

libNameChIPA <- args[2]

markChIPB <- args[3]

libNameChIPB <- args[4]

markControlA <- args[5]

libNameControlA <- args[6]

markControlB <- args[7]

libNameControlB <- args[8]

align <- args[9]

winName <- args[10]

winSize <- as.numeric(args[11])

N <- as.numeric(args[12])

colourA <- args[13]

colourB <- args[14]

date <- args[15]

chrName <- unlist(strsplit(args[16],

split = ","))

makeTransparent <- function(thisColour, alpha = 210)

{

newColour <- col2rgb(thisColour)

apply(newColour, 2, function(x) {

rgb(red = x[1], green = x[2], blue = x[3],

alpha = alpha, maxColorValue = 255)

})

}

colourA <- makeTransparent(colourA)

colourB <- makeTransparent(colourB)

# Source functions

source("/projects/ajt200/Rfunctions/wheatPlotFunctions.R")

library(parallel)

library(plyr)

library(data.table)

library(varhandle)

library(zoo)

plotDir <- "plots/"

# Genomic definitions

chrs <- as.vector(read.table("wheat_v1.0.fa.sizes")[,1])

chrs <- chrs[-length(chrs)]

chrLens <- as.vector(read.table("wheat_v1.0.fa.sizes")[,2])

chrLens <- chrLens[-length(chrLens)]

centromereStart <- as.vector(read.table(paste0("chromosome_compartments/",

"centromeres_outer_CENH3enriched_IWGSC_2018_Science_Table_S11_chr4AL

eftmostInterval_chr5ARightTwoIntervals.txt"))[,2])

centromereEnd <- as.vector(read.table(paste0("chromosome_compartments/",

"centromeres_outer_CENH3enriched_IWGSC_2018_Science_Table_S11_chr4ALef

tmostInterval_chr5ARightTwoIntervals.txt"))[,3])

chrPartitions <- read.table(paste0("chromosome_compartments/",

"chromosome_partitions_IWGSC_2018_Science_Table_S29.txt"),

header = TRUE)

markers <- read.table("/home/ajt200/analysis/wheat/annotation/221118_download/iwgsc_refseqv1.0_recombination_rate_analysis/iwgsc_refseqv1.0_mapping_data.txt",

header = TRUE)

## ChIPA profile

if(libNameChIPA %in% c("H3K4me3_ChIP_SRR6350668",

"H3K27me3_ChIP_SRR6350666",

"H3K36me3_ChIP_SRR6350670",

"H3K9ac_ChIP_SRR6350667",

"CENH3_ChIP_SRR1686799")) {

covDirChIPA <- paste0("/home/ajt200/analysis/wheat/epigenomics_shoot_leaf_IWGSC_2018_Science/",

markChIPA, "/snakemake_ChIPseq/mapped/",

align, "/bg/")

} else if(libNameChIPA %in% c("H3K4me1_Rep1_ChIP_SRR8126618",

"H3K27ac_Rep1_ChIP_SRR8126621")) {

covDirChIPA <- paste0("/home/ajt200/analysis/wheat/epigenomics_seedlings_Li_2019_Genome_Biol/",

markChIPA, "/snakemake_ChIPseq/mapped/",

align, "/bg/")

} else {

covDirChIPA <- paste0("/home/ajt200/analysis/wheat/",

markChIPA, "/snakemake_ChIPseq/mapped/",

align, "/bg/")

}

profileChIPA <- read.table(paste0(covDirChIPA, libNameChIPA, "_MappedOn_wheat_v1.0_lowXM_",

align, "_sort_norm_binSize", winName, ".bedgraph"))

# Rows where the difference between end and start coordinates is > winSize

profileChIPA_bigWins <- profileChIPA[profileChIPA$V3-profileChIPA$V2 > winSize,]

# Rows where the difference between end and start coordinates is == winSize

profileChIPA <- profileChIPA[profileChIPA$V3-profileChIPA$V2 == winSize,]

# Create a list of big windows, each split into windows of winSize,

# or < winSize if at chromosome end

profileChIPA_bigWinsList <- mclapply(seq_along(1:dim(profileChIPA_bigWins)[1]), function(x) {

bigWinsSplit <- seq(from = profileChIPA_bigWins[x,]$V2,

to = profileChIPA_bigWins[x,]$V3,

by = winSize)

if(bigWinsSplit[length(bigWinsSplit)] < profileChIPA_bigWins[x,]$V3) {

data.frame(V1 = as.character(profileChIPA_bigWins[x,]$V1),

V2 = as.integer(c(bigWinsSplit[-length(bigWinsSplit)],

bigWinsSplit[length(bigWinsSplit)])),

V3 = as.integer(c(bigWinsSplit[-length(bigWinsSplit)]+winSize,

profileChIPA_bigWins[x,]$V3)),

V4 = as.numeric(profileChIPA_bigWins[x,]$V4))

} else if (bigWinsSplit[length(bigWinsSplit)] == profileChIPA_bigWins[x,]$V3) {

data.frame(V1 = as.character(profileChIPA_bigWins[x,]$V1),

V2 = as.integer(bigWinsSplit[-length(bigWinsSplit)]),

V3 = as.integer(bigWinsSplit[-length(bigWinsSplit)]+winSize),

V4 = as.numeric(profileChIPA_bigWins[x,]$V4))

}

}, mc.cores = detectCores())

profileChIPA_bigWinsDT <- rbindlist(profileChIPA_bigWinsList)

profileChIPA <- rbind.fill(profileChIPA, profileChIPA_bigWinsDT)

profileChIPA <- profileChIPA[order(profileChIPA$V1, profileChIPA$V2),]

chrLenValsAList <- mclapply(seq_along(chrs), function (x) {

chrProfileChIPA <- profileChIPA[profileChIPA$V1 == chrs[x],]

if(chrProfileChIPA[dim(chrProfileChIPA)[1],]$V3 < chrLens[x]) {

data.frame(V1 = chrs[x],

V2 = as.integer(chrProfileChIPA[dim(chrProfileChIPA)[1],]$V3),

V3 = as.integer(chrLens[x]),

V4 = as.numeric(chrProfileChIPA[dim(chrProfileChIPA)[1],]$V4))

}

}, mc.cores = detectCores())

profileChIPA_chrLenValsADT <- rbindlist(chrLenValsAList)

profileChIPA <- rbind.fill(profileChIPA, profileChIPA_chrLenValsADT)

profileChIPA <- profileChIPA[order(profileChIPA$V1, profileChIPA$V2),]

profileChIPA <- data.frame(chr = as.character(profileChIPA$V1),

window = as.integer(profileChIPA$V2+1),

CPM = as.numeric(profileChIPA$V4),

stringsAsFactors = F)

## ChIPB profile

if(libNameChIPB %in% c("H3K4me3_ChIP_SRR6350668",

"H3K27me3_ChIP_SRR6350666",

"H3K36me3_ChIP_SRR6350670",

"H3K9ac_ChIP_SRR6350667",

"CENH3_ChIP_SRR1686799")) {

covDirChIPB <- paste0("/home/ajt200/analysis/wheat/epigenomics_shoot_leaf_IWGSC_2018_Science/",

markChIPB, "/snakemake_ChIPseq/mapped/",

align, "/bg/")

} else if(libNameChIPB %in% c("H3K4me1_Rep1_ChIP_SRR8126618",

"H3K27ac_Rep1_ChIP_SRR8126621")) {

covDirChIPB <- paste0("/home/ajt200/analysis/wheat/epigenomics_seedlings_Li_2019_Genome_Biol/",

markChIPB, "/snakemake_ChIPseq/mapped/",

align, "/bg/")

} else {

covDirChIPB <- paste0("/home/ajt200/analysis/wheat/",

markChIPB, "/snakemake_ChIPseq/mapped/",

align, "/bg/")

}

profileChIPB <- read.table(paste0(covDirChIPB, libNameChIPB, "_MappedOn_wheat_v1.0_lowXM_",

align, "_sort_norm_binSize", winName, ".bedgraph"))

# Rows where the difference between end and start coordinates is > winSize

profileChIPB_bigWins <- profileChIPB[profileChIPB$V3-profileChIPB$V2 > winSize,]

# Rows where the difference between end and start coordinates is == winSize

profileChIPB <- profileChIPB[profileChIPB$V3-profileChIPB$V2 == winSize,]

# Create a list of big windows, each split into windows of winSize,

# or < winSize if at chromosome end

profileChIPB_bigWinsList <- mclapply(seq_along(1:dim(profileChIPB_bigWins)[1]), function(x) {

bigWinsSplit <- seq(from = profileChIPB_bigWins[x,]$V2,

to = profileChIPB_bigWins[x,]$V3,

by = winSize)

if(bigWinsSplit[length(bigWinsSplit)] < profileChIPB_bigWins[x,]$V3) {

data.frame(V1 = as.character(profileChIPB_bigWins[x,]$V1),

V2 = as.integer(c(bigWinsSplit[-length(bigWinsSplit)],

bigWinsSplit[length(bigWinsSplit)])),

V3 = as.integer(c(bigWinsSplit[-length(bigWinsSplit)]+winSize,

profileChIPB_bigWins[x,]$V3)),

V4 = as.numeric(profileChIPB_bigWins[x,]$V4))

} else if (bigWinsSplit[length(bigWinsSplit)] == profileChIPB_bigWins[x,]$V3) {

data.frame(V1 = as.character(profileChIPB_bigWins[x,]$V1),

V2 = as.integer(bigWinsSplit[-length(bigWinsSplit)]),

V3 = as.integer(bigWinsSplit[-length(bigWinsSplit)]+winSize),

V4 = as.numeric(profileChIPB_bigWins[x,]$V4))

}

}, mc.cores = detectCores())

profileChIPB_bigWinsDT <- rbindlist(profileChIPB_bigWinsList)

profileChIPB <- rbind.fill(profileChIPB, profileChIPB_bigWinsDT)

profileChIPB <- profileChIPB[order(profileChIPB$V1, profileChIPB$V2),]

chrLenValsBList <- mclapply(seq_along(chrs), function (x) {

chrProfileChIPB <- profileChIPB[profileChIPB$V1 == chrs[x],]

if(chrProfileChIPB[dim(chrProfileChIPB)[1],]$V3 < chrLens[x]) {

data.frame(V1 = chrs[x],

V2 = as.integer(chrProfileChIPB[dim(chrProfileChIPB)[1],]$V3),

V3 = as.integer(chrLens[x]),

V4 = as.numeric(chrProfileChIPB[dim(chrProfileChIPB)[1],]$V4))

}

}, mc.cores = detectCores())

profileChIPB_chrLenValsBDT <- rbindlist(chrLenValsBList)

profileChIPB <- rbind.fill(profileChIPB, profileChIPB_chrLenValsBDT)

profileChIPB <- profileChIPB[order(profileChIPB$V1, profileChIPB$V2),]

profileChIPB <- data.frame(chr = as.character(profileChIPB$V1),

window = as.integer(profileChIPB$V2+1),

CPM = as.numeric(profileChIPB$V4),

stringsAsFactors = F)

## ControlA profile

if(libNameControlA == "MNase_Rep1") {

covDirControlA <- paste0("/home/ajt200/analysis/wheat/",

"MNase/snakemake_ChIPseq/mapped/", align, "/bg/")

profileControlA <- read.table(paste0(covDirControlA, "MNase_Rep1_MappedOn_wheat_v1.0_lowXM_",

align, "_sort_norm_binSize", winName, ".bedgraph"))

} else if(libNameControlA == "input_SRR6350669") {

covDirControlA <- paste0("/home/ajt200/analysis/wheat/epigenomics_shoot_leaf_IWGSC_2018_Science/",

"input/snakemake_ChIPseq/mapped/", align, "/bg/")

profileControlA <- read.table(paste0(covDirControlA, "input_SRR6350669_MappedOn_wheat_v1.0_lowXM_",

align, "_sort_norm_binSize", winName, ".bedgraph"))

} else {

if(!(libNameControlA %in% c("MNase_Rep1", "input_SRR6350669"))) {

stop("libNameControlA is neither MNase_Rep1 nor input_SRR6350669")

}

}

# Rows where the difference between end and start coordinates is > winSize

profileControlA_bigWins <- profileControlA[profileControlA$V3-profileControlA$V2 > winSize,]

# Rows where the difference between end and start coordinates is == winSize

profileControlA <- profileControlA[profileControlA$V3-profileControlA$V2 == winSize,]

# Create a list of big windows, each split into windows of winSize,

# or < winSize if at chromosome end

profileControlA_bigWinsList <- mclapply(seq_along(1:dim(profileControlA_bigWins)[1]), function(x) {

bigWinsSplit <- seq(from = profileControlA_bigWins[x,]$V2,

to = profileControlA_bigWins[x,]$V3,

by = winSize)

if(bigWinsSplit[length(bigWinsSplit)] < profileControlA_bigWins[x,]$V3) {

data.frame(V1 = as.character(profileControlA_bigWins[x,]$V1),

V2 = as.integer(c(bigWinsSplit[-length(bigWinsSplit)],

bigWinsSplit[length(bigWinsSplit)])),

V3 = as.integer(c(bigWinsSplit[-length(bigWinsSplit)]+winSize,

profileControlA_bigWins[x,]$V3)),

V4 = as.numeric(profileControlA_bigWins[x,]$V4))

} else if (bigWinsSplit[length(bigWinsSplit)] == profileControlA_bigWins[x,]$V3) {

data.frame(V1 = as.character(profileControlA_bigWins[x,]$V1),

V2 = as.integer(bigWinsSplit[-length(bigWinsSplit)]),

V3 = as.integer(bigWinsSplit[-length(bigWinsSplit)]+winSize),

V4 = as.numeric(profileControlA_bigWins[x,]$V4))

}

}, mc.cores = detectCores())

profileControlA_bigWinsDT <- rbindlist(profileControlA_bigWinsList)

profileControlA <- rbind.fill(profileControlA, profileControlA_bigWinsDT)

profileControlA <- profileControlA[order(profileControlA$V1, profileControlA$V2),]

chrLenValsAList <- mclapply(seq_along(chrs), function (x) {

chrProfileControl <- profileControlA[profileControlA$V1 == chrs[x],]

if(chrProfileControl[dim(chrProfileControl)[1],]$V3 < chrLens[x]) {

data.frame(V1 = chrs[x],

V2 = as.integer(chrProfileControl[dim(chrProfileControl)[1],]$V3),

V3 = as.integer(chrLens[x]),

V4 = as.numeric(chrProfileControl[dim(chrProfileControl)[1],]$V4))

}

}, mc.cores = detectCores())

profileControlA_chrLenValsADT <- rbindlist(chrLenValsAList)

profileControlA <- rbind.fill(profileControlA, profileControlA_chrLenValsADT)

profileControlA <- profileControlA[order(profileControlA$V1, profileControlA$V2),]

profileControlA <- data.frame(chr = as.character(profileControlA$V1),

window = as.integer(profileControlA$V2+1),

CPM = as.numeric(profileControlA$V4),

stringsAsFactors = F)

## ControlB profile

if(libNameControlB == "MNase_Rep1") {

covDirControlB <- paste0("/home/ajt200/analysis/wheat/",

"MNase/snakemake_ChIPseq/mapped/", align, "/bg/")

profileControlB <- read.table(paste0(covDirControlB, "MNase_Rep1_MappedOn_wheat_v1.0_lowXM_",

align, "_sort_norm_binSize", winName, ".bedgraph"))

} else if(libNameControlB == "input_SRR6350669") {

covDirControlB <- paste0("/home/ajt200/analysis/wheat/epigenomics_shoot_leaf_IWGSC_2018_Science/",

"input/snakemake_ChIPseq/mapped/", align, "/bg/")

profileControlB <- read.table(paste0(covDirControlB, "input_SRR6350669_MappedOn_wheat_v1.0_lowXM_",

align, "_sort_norm_binSize", winName, ".bedgraph"))

} else {

if(!(libNameControlB %in% c("MNase_Rep1", "input_SRR6350669"))) {

stop("libNameControlB is neither MNase_Rep1 nor input_SRR6350669")

}

}

# Rows where the difference between end and start coordinates is > winSize

profileControlB_bigWins <- profileControlB[profileControlB$V3-profileControlB$V2 > winSize,]

# Rows where the difference between end and start coordinates is == winSize

profileControlB <- profileControlB[profileControlB$V3-profileControlB$V2 == winSize,]

# Create a list of big windows, each split into windows of winSize,

# or < winSize if at chromosome end

profileControlB_bigWinsList <- mclapply(seq_along(1:dim(profileControlB_bigWins)[1]), function(x) {

bigWinsSplit <- seq(from = profileControlB_bigWins[x,]$V2,

to = profileControlB_bigWins[x,]$V3,

by = winSize)

if(bigWinsSplit[length(bigWinsSplit)] < profileControlB_bigWins[x,]$V3) {

data.frame(V1 = as.character(profileControlB_bigWins[x,]$V1),

V2 = as.integer(c(bigWinsSplit[-length(bigWinsSplit)],

bigWinsSplit[length(bigWinsSplit)])),

V3 = as.integer(c(bigWinsSplit[-length(bigWinsSplit)]+winSize,

profileControlB_bigWins[x,]$V3)),

V4 = as.numeric(profileControlB_bigWins[x,]$V4))

} else if (bigWinsSplit[length(bigWinsSplit)] == profileControlB_bigWins[x,]$V3) {

data.frame(V1 = as.character(profileControlB_bigWins[x,]$V1),

V2 = as.integer(bigWinsSplit[-length(bigWinsSplit)]),

V3 = as.integer(bigWinsSplit[-length(bigWinsSplit)]+winSize),

V4 = as.numeric(profileControlB_bigWins[x,]$V4))

}

}, mc.cores = detectCores())

profileControlB_bigWinsDT <- rbindlist(profileControlB_bigWinsList)

profileControlB <- rbind.fill(profileControlB, profileControlB_bigWinsDT)

profileControlB <- profileControlB[order(profileControlB$V1, profileControlB$V2),]

chrLenValsBList <- mclapply(seq_along(chrs), function (x) {

chrProfileControl <- profileControlB[profileControlB$V1 == chrs[x],]

if(chrProfileControl[dim(chrProfileControl)[1],]$V3 < chrLens[x]) {

data.frame(V1 = chrs[x],

V2 = as.integer(chrProfileControl[dim(chrProfileControl)[1],]$V3),

V3 = as.integer(chrLens[x]),

V4 = as.numeric(chrProfileControl[dim(chrProfileControl)[1],]$V4))

}

}, mc.cores = detectCores())

profileControlB_chrLenValsBDT <- rbindlist(chrLenValsBList)

profileControlB <- rbind.fill(profileControlB, profileControlB_chrLenValsBDT)

profileControlB <- profileControlB[order(profileControlB$V1, profileControlB$V2),]

profileControlB <- data.frame(chr = as.character(profileControlB$V1),

window = as.integer(profileControlB$V2+1),

CPM = as.numeric(profileControlB$V4),

stringsAsFactors = F)

## ChIPA

# Calculate log2((ChIP+1)/(Control+1)) coverage within each window

profileChIPAlog2 <- data.frame(chr = as.character(profileChIPA$chr),

window = as.numeric(profileChIPA$window),

log2CPM = as.numeric(log2((profileChIPA$CPM+1)/(profileControlA$CPM+1))),

stringsAsFactors = F)

chrProfilesChIPA <- mclapply(seq_along(chrs), function(x) {

profileChIPAlog2[profileChIPAlog2$chr == chrs[x],]

}, mc.cores = length(chrs))

# Calculate moving average of current window, ((N/2)-0.5) previous windows,

# and ((N/2)-0.5) subsequent windows

# (the higher N is, the greater the smoothing)

flank <- (N/2)-0.5

# Define MA filter coefficients

f <- rep(1/N, N)

filt_chrProfilesChIPA <- mclapply(seq_along(chrProfilesChIPA), function(x) {

filt_chrProfile <- stats::filter(x = chrProfilesChIPA[[x]]$log2CPM,

filter = f,

sides = 2)

filt_chrProfile[1:flank] <- filt_chrProfile[flank+1]

filt_chrProfile[(length(filt_chrProfile)-flank+1):length(filt_chrProfile)] <- filt_chrProfile[(length(filt_chrProfile)-flank)]

data.frame(chr = as.character(chrProfilesChIPA[[x]]$chr),

window = as.integer(chrProfilesChIPA[[x]]$window),

filt_log2CPM = as.numeric(filt_chrProfile),

stringsAsFactors = F)

}, mc.cores = length(chrProfilesChIPA))

minCPMA_chrs <- min(unlist(mclapply(seq_along(filt_chrProfilesChIPA),

function(x) {

min(c(filt_chrProfilesChIPA[[x]]$filt_log2CPM))

}, mc.cores = length(filt_chrProfilesChIPA))))-0.25

maxCPMA_chrs <- max(unlist(mclapply(seq_along(filt_chrProfilesChIPA),

function(x) {

max(c(filt_chrProfilesChIPA[[x]]$filt_log2CPM))

}, mc.cores = length(filt_chrProfilesChIPA))))+0.25

minCPMA <- min(unlist(mclapply(which(chrs %in% chrName),

function(x) {

min(c(filt_chrProfilesChIPA[[x]]$filt_log2CPM))

}, mc.cores = length(filt_chrProfilesChIPA))))-0.25

maxCPMA <- max(unlist(mclapply(which(chrs %in% chrName),

function(x) {

max(c(filt_chrProfilesChIPA[[x]]$filt_log2CPM))

}, mc.cores = length(filt_chrProfilesChIPA))))+0.25

## ChIPB

# Calculate log2((ChIP+1)/(Control+1)) coverage within each window

profileChIPBlog2 <- data.frame(chr = as.character(profileChIPB$chr),

window = as.numeric(profileChIPB$window),

log2CPM = as.numeric(log2((profileChIPB$CPM+1)/(profileControlB$CPM+1))),

stringsAsFactors = F)

chrProfilesChIPB <- mclapply(seq_along(chrs), function(x) {

profileChIPBlog2[profileChIPBlog2$chr == chrs[x],]

}, mc.cores = length(chrs))

# Calculate moving average of current window, ((N/2)-0.5) previous windows,

# and ((N/2)-0.5) subsequent windows

# (the higher N is, the greater the smoothing)

flank <- (N/2)-0.5

# Define MA filter coefficients

f <- rep(1/N, N)

filt_chrProfilesChIPB <- mclapply(seq_along(chrProfilesChIPB), function(x) {

filt_chrProfile <- stats::filter(x = chrProfilesChIPB[[x]]$log2CPM,

filter = f,

sides = 2)

filt_chrProfile[1:flank] <- filt_chrProfile[flank+1]

filt_chrProfile[(length(filt_chrProfile)-flank+1):length(filt_chrProfile)] <- filt_chrProfile[(length(filt_chrProfile)-flank)]

data.frame(chr = as.character(chrProfilesChIPB[[x]]$chr),

window = as.integer(chrProfilesChIPB[[x]]$window),

filt_log2CPM = as.numeric(filt_chrProfile),

stringsAsFactors = F)

}, mc.cores = length(chrProfilesChIPB))

minCPMB_chrs <- min(unlist(mclapply(seq_along(filt_chrProfilesChIPB),

function(x) {

min(c(filt_chrProfilesChIPB[[x]]$filt_log2CPM))

}, mc.cores = length(filt_chrProfilesChIPB))))-0.025

maxCPMB_chrs <- max(unlist(mclapply(seq_along(filt_chrProfilesChIPB),

function(x) {

max(c(filt_chrProfilesChIPB[[x]]$filt_log2CPM))

}, mc.cores = length(filt_chrProfilesChIPB))))+0.025

minCPMB <- min(unlist(mclapply(which(chrs %in% chrName),

function(x) {

min(c(filt_chrProfilesChIPB[[x]]$filt_log2CPM))

}, mc.cores = length(filt_chrProfilesChIPB))))-0.025

maxCPMB <- max(unlist(mclapply(which(chrs %in% chrName),

function(x) {

max(c(filt_chrProfilesChIPB[[x]]$filt_log2CPM))

}, mc.cores = length(filt_chrProfilesChIPB))))+0.025

# Recombination rate (cM/Mb) and feature frequency chromosome profiles

featureA <- read.table("/home/ajt200/analysis/wheat/chromosomeProfiles/cMMb/iwgsc_refseqv1.0_recombination_rate.txt",

header = T)

colnames(featureA) <- c("chr", "window", "intervalEnd", "nbOfSnps", "filt_feature")

featureB <- read.table(paste0("/home/ajt200/analysis/wheat/chromosomeProfiles/genes/gene_frequency_per_10Mb_step1Mb.txt"),

header = T)

colnames(featureB) <- c("chr", "window", "filt_feature")

filt_chrProfilesFeatureA <- mclapply(seq_along(chrs), function(x) {

featureA[featureA$chr == chrs[x],]

}, mc.cores = length(chrs))

filt_chrProfilesFeatureB <- mclapply(seq_along(chrs), function(x) {

featureB[featureB$chr == chrs[x] &

featureB$window %in% featureA[featureA$chr == chrs[x],]$window,]

}, mc.cores = length(chrs))

minFeatureA_chrs <- min(unlist(mclapply(seq_along(filt_chrProfilesFeatureA),

function(x) {

min(c(filt_chrProfilesFeatureA[[x]]$filt_feature), na.rm = T)

}, mc.cores = length(filt_chrProfilesFeatureA))))

maxFeatureA_chrs <- max(unlist(mclapply(seq_along(filt_chrProfilesFeatureA),

function(x) {

max(c(filt_chrProfilesFeatureA[[x]]$filt_feature), na.rm = T)

}, mc.cores = length(filt_chrProfilesFeatureA))))

minFeatureA <- min(unlist(mclapply(which(chrs %in% chrName),

function(x) {

min(c(filt_chrProfilesFeatureA[[x]]$filt_feature), na.rm = T)

}, mc.cores = length(filt_chrProfilesFeatureA))))

maxFeatureA <- max(unlist(mclapply(which(chrs %in% chrName),

function(x) {

max(c(filt_chrProfilesFeatureA[[x]]$filt_feature), na.rm = T)

}, mc.cores = length(filt_chrProfilesFeatureA))))

minFeatureB_chrs <- min(unlist(mclapply(seq_along(filt_chrProfilesFeatureB),

function(x) {

min(c(filt_chrProfilesFeatureB[[x]]$filt_feature), na.rm = T)

}, mc.cores = length(filt_chrProfilesFeatureB))))

maxFeatureB_chrs <- max(unlist(mclapply(seq_along(filt_chrProfilesFeatureB),

function(x) {

max(c(filt_chrProfilesFeatureB[[x]]$filt_feature), na.rm = T)

}, mc.cores = length(filt_chrProfilesFeatureB))))

minFeatureB <- min(unlist(mclapply(which(chrs %in% chrName),

function(x) {

min(c(filt_chrProfilesFeatureB[[x]]$filt_feature), na.rm = T)

}, mc.cores = length(filt_chrProfilesFeatureB))))

maxFeatureB <- max(unlist(mclapply(which(chrs %in% chrName),

function(x) {

max(c(filt_chrProfilesFeatureB[[x]]$filt_feature), na.rm = T)

}, mc.cores = length(filt_chrProfilesFeatureB))))

# Plot

pdf(paste0(plotDir, "Wheat_", paste0(chrName, collapse = "_"),

"_log2_", libNameChIPA, "_", libNameControlA,

"_log2_", libNameChIPB, "_", libNameControlB, "_",

align, "_featureFreq_chrPlot_winSize", winName, "_smooth", N,

"_CSxRenan_step1Mb_IWGSCanalysis_v", date, ".pdf"),

height = 4, width = 10*length(chrName))

par(mfrow = c(1, length(chrName)))

par(mar = c(5.0, 9.0, 2.1, 9.0))

for(x in which(chrs %in% chrName)) {

chrPartitionPlotCov2_feature2(chrx = which(chrs %in% chrName),

title = sub("c", "C", chrs[x]),

cenStart = centromereStart[x],

cenEnd = centromereEnd[x],

rug1 = markers[markers$chromosome == chrs[x],]$physicalPosition,

rug1Col = "grey40",

xplot1 = filt_chrProfilesChIPA[[x]]$window,

dat1A = filt_chrProfilesChIPA[[x]]$filt_log2CPM,

col1A = colourA,

dat1B = filt_chrProfilesChIPB[[x]]$filt_log2CPM,

col1B = colourB,

Ylab1 = bquote("Log"[2]*"(ChIP/control)"),

min1A = -max((minCPMA*-1), maxCPMA),

max1A = max((minCPMA*-1), maxCPMA),

min1B = -max((minCPMB*-1), maxCPMB),

max1B = max((minCPMB*-1), maxCPMB),

legendLoc = "bottomright",

legendLabs = c(sub("_\\w+", "", markChIPA), sub("_\\w+", "", markChIPB), "cM/Mb", "Genes"),

xplot2 = filt_chrProfilesFeatureA[[x]]$window,

dat2A = filt_chrProfilesFeatureA[[x]]$filt_feature,

col2A = "darkorange2",

dat2B = filt_chrProfilesFeatureB[[x]]$filt_feature,

col2B = "magenta3",

Ylab2 = "",

min2A = 0-maxFeatureA,

max2A = maxFeatureA,

min2B = 0-maxFeatureB,

max2B = maxFeatureB)

}

dev.off()

pdf(paste0(plotDir, "Wheat",

"_log2_", libNameChIPA, "_", libNameControlA,

"_log2_", libNameChIPB, "_", libNameControlB, "_",

align, "_featureFreq_chrPlot_winSize", winName, "_smooth", N,

"_CSxRenan_step1Mb_IWGSCanalysis_v", date, ".pdf"),

height = 4*7, width = 8*3)

par(mfrow = c(7, 3))

par(mar = c(5.0, 6.0, 2.1, 6.0))

for(x in which(chrs %in% chrs)) {

chrPartitionPlotCov2_feature2(chrx = which(chrs %in% chrs),

title = sub("c", "C", chrs[x]),

cenStart = centromereStart[x],

cenEnd = centromereEnd[x],

rug1 = markers[markers$chromosome == chrs[x],]$physicalPosition,

rug1Col = "grey40",

xplot1 = filt_chrProfilesChIPA[[x]]$window,

dat1A = filt_chrProfilesChIPA[[x]]$filt_log2CPM,

col1A = colourA,

dat1B = filt_chrProfilesChIPB[[x]]$filt_log2CPM,

col1B = colourB,

# Ylab1 = bquote("Log"[2]*"(ChIP/control)"),

Ylab1 = "",

min1A = -max((minCPMA_chrs*-1), maxCPMA_chrs),

max1A = max((minCPMA_chrs*-1), maxCPMA_chrs),

min1B = -max((minCPMB_chrs*-1), maxCPMB_chrs),

max1B = max((minCPMB_chrs*-1), maxCPMB_chrs),

legendLoc = "bottomright",

legendLabs = c(sub("_\\w+", "", markChIPA), sub("_\\w+", "", markChIPB), "cM/Mb", "Genes"),

xplot2 = filt_chrProfilesFeatureA[[x]]$window,

dat2A = filt_chrProfilesFeatureA[[x]]$filt_feature,

col2A = "darkorange2",

dat2B = filt_chrProfilesFeatureB[[x]]$filt_feature,

col2B = "magenta3",

Ylab2 = "",

min2A = 0-maxFeatureA_chrs,

max2A = maxFeatureA_chrs,

min2B = 0-maxFeatureB_chrs,

max2B = maxFeatureB_chrs)

}

dev.off()

Script: chrProfiles_correlation_matrix.R:

#!/applications/R/R-4.0.0/bin/Rscript

# Create and plot correlation matrices of chromosome profiles for

# log2(ChIP/input), cM/Mb, MNase, DNA methylation,

# and NLR-encoding, defense response and meiotic genes, and TE superfamilies,

# genome-wide, subgenome-wide or separated into the following chromosome compartments a.k.a. partitions):

# 1. R1 and R3 (distal)

# 2. R2a and R2b (interstitial)

# 3. C (proximal)

# 4. "heterochromatin" (interstitial and proximal)

# 5. centromeric (defined by IWGSC (2018) Science 361 using CENH3 ChIP-seq data from Guo et al. (2016) PLOS Genet. 12)

# Usage:

# ./chrProfiles_correlation_matrix.R 1Mb 1000000 distal 'A,B,D' smoothed

#winName <- "1Mb"

#winSize <- 1000000

#region <- "distal"

#genomeName <- unlist(strsplit("A,B,D",

# split = ","))

#smoothing <- "smoothed"

args <- commandArgs(trailingOnly = T)

winName <- args[1]

winSize <- as.numeric(args[2])

region <- args[3]

genomeName <- unlist(strsplit(args[4],

split = ","))

smoothing <- args[5]

plotDir <- paste0("plots/correlation_matrices/")

system(paste0("[ -d ", plotDir, " ] || mkdir ", plotDir))

library(GenomicRanges)

library(Hmisc) # includes rcorr() function which computes significance levels for Pearson and Spearman correlations

library(reshape)

library(ggplot2)

library(ggcorrplot)

# Genomic definitions

chrs <- as.vector(read.table("wheat_v1.0.fa.sizes")[,1])

chrs <- chrs[-length(chrs)]

chrStart <- c(rep(1, times = length(chrs)))

chrLens <- as.vector(read.table("wheat_v1.0.fa.sizes")[,2])

chrLens <- chrLens[-length(chrLens)]

centromereStart <- as.vector(read.table(paste0("chromosome_compartments/",

"centromeres_outer_CENH3enriched_IWGSC_2018_Science_Table_S11_chr4AL

eftmostInterval_chr5ARightTwoIntervals.txt"))[,2])

centromereEnd <- as.vector(read.table(paste0("chromosome_compartments/",

"centromeres_outer_CENH3enriched_IWGSC_2018_Science_Table_S11_chr4ALef

tmostInterval_chr5ARightTwoIntervals.txt"))[,3])

chrPartitions <- read.table(paste0("chromosome_compartments/",

"chromosome_partitions_IWGSC_2018_Science_Table_S29.txt"),

header = TRUE)

genomeGR <- GRanges(seqnames = chrs,

ranges = IRanges(start = chrStart,

end = chrLens),

strand = "*")

if(length(genomeName) == 1) {

genomeGR <- genomeGR[grep(genomeName,

seqnames(genomeGR))@values]

}

# Define region to be analysed

if(region == "distal") {

regionGR <- GRanges(seqnames = rep(chrPartitions$chrom, 2),

ranges = IRanges(start = c(rep(1, dim(chrPartitions)[1]),

chrPartitions$R2b_R3),

end = c(chrPartitions$R1_R2a,

chrLens)),

strand = "*")

if(length(genomeName) == 1) {

regionGR <- regionGR[grep(genomeName,

seqnames(regionGR))@values]

}

} else if(region == "interstitial") {

regionGR <- GRanges(seqnames = rep(chrPartitions$chrom, 2),

ranges = IRanges(start = c(chrPartitions$R1_R2a+1,

chrPartitions$C_R2b),

end = c(chrPartitions$R2a_C,

chrPartitions$R2b_R3-1)),

strand = "*")

if(length(genomeName) == 1) {

regionGR <- regionGR[grep(genomeName,

seqnames(regionGR))@values]

}

} else if(region == "proximal") {

regionGR <- GRanges(seqnames = chrPartitions$chrom,

ranges = IRanges(start = chrPartitions$R2a_C+1,

end = chrPartitions$C_R2b-1),

strand = "*")

if(length(genomeName) == 1) {

regionGR <- regionGR[grep(genomeName,

seqnames(regionGR))@values]

}

} else if(region == "heterochromatin") {

regionGR <- GRanges(seqnames = chrPartitions$chrom,

ranges = IRanges(start = chrPartitions$R1_R2a+1,

end = chrPartitions$R2b_R3-1),

strand = "*")

if(length(genomeName) == 1) {

regionGR <- regionGR[grep(genomeName,

seqnames(regionGR))@values]

}

} else if(region == "centromeric") {

regionGR <- GRanges(seqnames = chrs,

ranges = IRanges(start = centromereStart,

end = centromereEnd),

strand = "*")

if(length(genomeName) == 1) {

regionGR <- regionGR[grep(genomeName,

seqnames(regionGR))@values]

}

} else if(region == "genomewide") {

regionGR <- GRanges(seqnames = chrs,

ranges = IRanges(start = rep(1, length(chrs)),

end = chrLens),

strand = "*")

if(length(genomeName) == 1) {

regionGR <- regionGR[grep(genomeName,

seqnames(regionGR))@values]

}

} else {

stop("region is not distal, interstitial, proximal, heterochromatin, centromeric, or genomewide")

}

# Define region to be masked out of analysis

if(region == "distal") {

maskGR <- GRanges(seqnames = chrPartitions$chrom,

ranges = IRanges(start = chrPartitions$R1_R2a+1,

end = chrPartitions$R2b_R3-1),

strand = "*")

if(length(genomeName) == 1) {

maskGR <- maskGR[grep(genomeName,

seqnames(maskGR))@values]

}

} else if(region == "interstitial") {

maskGR <- GRanges(seqnames = rep(chrPartitions$chrom, 3),

ranges = IRanges(start = c(rep(1, dim(chrPartitions)[1]),

chrPartitions$R2a_C+1,

chrPartitions$R2b_R3),

end = c(chrPartitions$R1_R2a,

chrPartitions$C_R2b-1,

chrLens)),

strand = "*")

if(length(genomeName) == 1) {

maskGR <- maskGR[grep(genomeName,

seqnames(maskGR))@values]

}

} else if(region == "proximal") {

maskGR <- GRanges(seqnames = rep(chrPartitions$chrom, 2),

ranges = IRanges(start = c(rep(1, dim(chrPartitions)[1]),

chrPartitions$C_R2b),

end = c(chrPartitions$R2a_C,

chrLens)),

strand = "*")

if(length(genomeName) == 1) {

maskGR <- maskGR[grep(genomeName,

seqnames(maskGR))@values]

}

} else if(region == "heterochromatin") {

maskGR <- GRanges(seqnames = rep(chrPartitions$chrom, 2),

ranges = IRanges(start = c(rep(1, dim(chrPartitions)[1]),

chrPartitions$R2b_R3),

end = c(chrPartitions$R1_R2a,

chrLens)),

strand = "*")

if(length(genomeName) == 1) {

maskGR <- maskGR[grep(genomeName,

seqnames(maskGR))@values]

}

} else if(region == "centromeric") {

maskGR <- GRanges(seqnames = rep(chrPartitions$chrom, 2),

ranges = IRanges(start = c(rep(1, dim(chrPartitions)[1]),

centromereEnd+1),

end = c(centromereStart-1,

chrLens)),

strand = "*")

if(length(genomeName) == 1) {

maskGR <- maskGR[grep(genomeName,

seqnames(maskGR))@values]

}

} else if(region == "genomewide") {

maskGR <- GRanges()

if(length(genomeName) == 1) {

maskGR <- maskGR[grep(genomeName,

seqnames(maskGR))@values]

}

} else {

stop("region is not distal, interstitial, proximal, heterochromatin, centromeric, or genomewide")

}

ChIPDir <- "/home/ajt200/analysis/wheat/chromosomeProfiles/log2ChIPcontrol/"

otherDir <- "/home/ajt200/analysis/wheat/chromosomeProfiles/MNase_DNase_input_RNAseq/"

cMMbDir <- "/home/ajt200/analysis/wheat/chromosomeProfiles/cMMb/"

geneDir <- "/home/ajt200/analysis/wheat/chromosomeProfiles/genes/"

DNAmethDir <- "/home/ajt200/analysis/wheat/chromosomeProfiles/DNAmeth/"

superfamDir <- "/home/ajt200/analysis/wheat/chromosomeProfiles/TEs/superfamilies/"

subfamDir <- "/home/ajt200/analysis/wheat/chromosomeProfiles/TEs/subfamilies/"

paths <- c(

paste0(ChIPDir, "log2_DMC1_Rep1_ChIP_H3_input_SRR6350669_per_", winName, "_", smoothing, ".txt"),

paste0(ChIPDir, "log2_ASY1_CS_Rep1_ChIP_H3_input_SRR6350669_per_", winName, "_", smoothing, ".txt"),

paste0(cMMbDir, "cMMb_iwgsc_refseqv1.0_mapping_data_minInterMarkerDist200bp_", winName, "_", smoothing, ".txt"),

paste0(ChIPDir, "log2_H3K4me1_Rep1_ChIP_SRR8126618_H3_input_SRR6350669_per_", winName, "_", smoothing, ".txt"),

paste0(ChIPDir, "log2_H3K4me3_Rep1_ChIP_MNase_Rep1_per_", winName, "_", smoothing, ".txt"),

paste0(ChIPDir, "log2_H3K27ac_Rep1_ChIP_SRR8126621_H3_input_SRR6350669_per_", winName, "_", smoothing, ".txt"),

paste0(ChIPDir, "log2_H3K27me3_ChIP_SRR6350666_H3_input_SRR6350669_per_", winName, "_", smoothing, ".txt"),

paste0(ChIPDir, "log2_H3K36me3_ChIP_SRR6350670_H3_input_SRR6350669_per_", winName, "_", smoothing, ".txt"),

paste0(ChIPDir, "log2_H3K9me2_Rep1_ChIP_MNase_Rep1_per_", winName, "_", smoothing, ".txt"),

paste0(ChIPDir, "log2_H3K27me1_Rep1_ChIP_MNase_Rep1_per_", winName, "_", smoothing, ".txt"),

paste0(DNAmethDir, "BSseq_Rep8a_SRR6792678_per_", winName, "_", smoothing, ".txt"),

paste0(otherDir, "MNase_Rep1_per_", winName, "_", smoothing, ".txt"),

paste0(geneDir, "gene_frequency_per_", winName, "_", smoothing, ".txt"),

paste0(geneDir, "defense_response_gene_frequency_per_", winName, "_", smoothing, ".txt"),

paste0(geneDir, "NLR_gene_frequency_per_", winName, "_", smoothing, ".txt"),

paste0(geneDir, "meiotic_gene_frequency_per_", winName, "_", smoothing, ".txt"),

paste0(superfamDir, "TE_frequency_per_", winName, "_superfamily_Mariner_DTT_", smoothing, ".txt"),

# paste0(superfamDir, "TE_frequency_per_", winName, "_superfamily_Unclassified_with_TIRs_DTX_", smoothing, ".txt"),

paste0(superfamDir, "TE_frequency_per_", winName, "_superfamily_Mutator_DTM_", smoothing, ".txt"),

paste0(superfamDir, "TE_frequency_per_", winName, "_superfamily_Harbinger_DTH_", smoothing, ".txt"),

# paste0(superfamDir, "TE_frequency_per_", winName, "_superfamily_CACTA_DTC_", smoothing, ".txt"),

# paste0(superfamDir, "TE_frequency_per_", winName, "_superfamily_hAT_DTA_", smoothing, ".txt"),

# paste0(superfamDir, "TE_frequency_per_", winName, "_superfamily_Helitrons_DHH_", smoothing, ".txt"),

# paste0(superfamDir, "TE_frequency_per_", winName, "_superfamily_SINE_SIX_", smoothing, ".txt"),

paste0(superfamDir, "TE_frequency_per_", winName, "_superfamily_LINE_RIX_", smoothing, ".txt"),

paste0(superfamDir, "TE_frequency_per_", winName, "_superfamily_Copia_LTR_RLC_", smoothing, ".txt"),

paste0(superfamDir, "TE_frequency_per_", winName, "_superfamily_Gypsy_LTR_RLG_", smoothing, ".txt")

# paste0(subfamDir, "TE_frequency_per_", winName, "_superfamily_Gypsy_LTR_RLG_subfamily_RLG_famc8.1_", smoothing, ".txt"),

# paste0(subfamDir, "TE_frequency_per_", winName, "_superfamily_Gypsy_LTR_RLG_subfamily_RLG_famc8.2_", smoothing, ".txt"),

# paste0(subfamDir, "TE_frequency_per_", winName, "_superfamily_Gypsy_LTR_RLG_subfamily_RLG_famc8.3_", smoothing, ".txt")

)

profileNames <- c(

"DMC1",

"ASY1",

"cM/Mb",

"H3K4me1",

"H3K4me3",

"H3K27ac",

"H3K27me3",

"H3K36me3",

"H3K9me2",

"H3K27me1",

"mCG",

"mCHG",

"mCHH",

"MNase",

"Genes",

"Defense response",

"NLR-encoding",

"Meiotic",

"Mariner",

# "Unclassified with TIRs",

"Mutator",

"Harbinger",

# "CACTA",

# "hAT",

# "Helitron",

# "SINE",

"LINE",

"Copia LTR",

"Gypsy LTR"

# "Gypsy Cereba",

# "Gypsy Quinta 1",

# "Gypsy Quinta 2"

)

profiles <- lapply(seq_along(paths), function(x) {

read.table(paths[x], header = T)

})

profilesNew <- lapply(seq_along(profiles), function(x) {

# Make columns consistent across log2ChIPinput,

# cMMb, MNase, DNase and gene data sets

if(dim(profiles[[x]])[2] >= 3 &

dim(profiles[[x]])[2] < 6) {

data.frame(chr = profiles[[x]][,1],

window = profiles[[x]][,2],

value = profiles[[x]][,dim(profiles[[x]])[2]],

stringsAsFactors = F)

# Separate DNA methylation contexts and make columns consistent as above

} else if(dim(profiles[[x]])[2] == 6) {

DNAmethList <- list()

# Exclude average over all 3 contexts

for(y in 3:5) {

print(y)

DNAmethList[[y]] <- data.frame(chr = profiles[[x]][,1],

window = profiles[[x]][,2],

value = profiles[[x]][,y],

stringsAsFactors = F)

}

# Remove empty ("NULL") list elements

DNAmethList[-1:-2]

}

})

# DNAmethList is one list of 3 elements within the 20-element list profilesNew

# To make each of these 3 elements its own element within a 22-element list profilesNew2:

profilesNew2 <- profilesNew

for(x in seq_along(profilesNew)) {

if(class(profilesNew[[x]]) == "list") {

listLength <- length(profilesNew[[x]])

for(z in (length(profilesNew) + listLength - 1) : (x+listLength) ) {

profilesNew2[[z]] <- profilesNew[[z - listLength + 1]]

}

for(y in 1:3) {

profilesNew2[[x + y - 1]] <- profilesNew[[x]][[y]]

}

}

}

profiles <- profilesNew2

profilesGR <- lapply(seq_along(profiles), function(x) {

GRanges(seqnames = profiles[[x]]$chr,

ranges = IRanges(start = profiles[[x]]$window,

end = profiles[[x]]$window+winSize-1),

strand = "*",

value = profiles[[x]]$value)

})

# Redefine end coordinate of last window in each chromosome

# to be equal to the length of that chromosome

profilesGR_chrs <- lapply(seq_along(profilesGR), function(x) {

profilesGRx <- lapply(seq_along(chrs), function(i) {

profilesGRx_chr <- profilesGR[[x]][seqnames(profilesGR[[x]]) == chrs[i]]

end(profilesGRx_chr)[length(profilesGRx_chr)] <- chrLens[i]

profilesGRx_chr

})

profilesGRx

})

# Combine GRanges list elements (1 element for each chromosome)

# in one GRanges object for each profile

profilesGR <- lapply(seq_along(profilesGR_chrs), function(x) {

do.call(c, profilesGR_chrs[[x]])

})

# Subset to include only those windows within the genomeName-subgenome

if(length(genomeName) == 1) {

profilesGR <- lapply(seq_along(profilesGR), function(x) {

profilesGR[[x]][grep(genomeName,

seqnames(profilesGR[[x]]))@values]

})

}

# Subset to include only those windows not overlapping masked region (e.g., heterochromatin)

profilesGR <- lapply(seq_along(profilesGR), function(x) {

mask_profilesGRx_overlap <- findOverlaps(query = maskGR,

subject = profilesGR[[x]],

type = "any",

select = "all",

ignore.strand = TRUE)

if(length(mask_profilesGRx_overlap) != 0) {

profilesGR[[x]][-subjectHits(mask_profilesGRx_overlap)]

} else {

profilesGR[[x]]

}

})

# Combine profiles into one data.frame in which each profile is a column

profilesVal <- lapply(seq_along(profilesGR), function(x) {

profilesGR[[x]]$value

})

profilesDF <- as.data.frame(do.call(cbind, profilesVal),

stringsAsFactors = F)

colnames(profilesDF) <- profileNames

# Create correlation matrix

corMat <- round(cor(profilesDF,

method = "spearman",

use = "pairwise.complete.obs"),

digits = 2)

# Set duplicates to NA

for(x in 1:dim(corMat)[1]) {

corMat[x, x] <- NA

if(x > 1) {

corMat[x, 1:x-1] <- NA

}

}

corMat <- corMat[,-1]

# Convert into reshape::melt formatted data.frame

# and remove duplicate pairs

corDat <- melt(corMat)

corDat <- corDat[-which(is.na(corDat[,3])),]

# Order the data.frame for plotting

profileNamesList <- as.list(profileNames)

names(profileNamesList) <- profileNames

levels(corDat$X1) <- rev(profileNamesList)

levels(corDat$X2) <- profileNamesList[-1]

# Get P-values for correlation matrix

corMatSig <- rcorr(as.matrix(profilesDF),

type = "spearman")$P

# Set duplicates to NA

for(x in 1:dim(corMatSig)[1]) {

corMatSig[x, x] <- NA

if(x > 1) {

corMatSig[x, 1:x-1] <- NA

}

}

corMatSig <- corMatSig[,-1]

# Convert into reshape::melt formatted data.frame

# and remove duplicate pairs

corDatSig <- melt(corMatSig)

corDatSig <- corDatSig[-which(is.na(corDatSig[,3])),]

# Standardise P-values to a sample size of 100 (q-values) as proposed by

# Good (1982) Standardized tail-area probabilities. Journal of Computation and Simulation 16: 65-66

# and summarised by Woolley (2003):

# https://stats.stackexchange.com/questions/22233/how-to-choose-significance-level-for-a-large-data-set

# http://citeseerx.ist.psu.edu/viewdoc/download?doi=10.1.1.518.5341&rep=rep1&type=pdf

# Woolley (2003): "Clearly, the meaningfulness of the p-value diminishes as the sample size increases";

# Anne Z. (2012, Pearson eCollege, Denver): "In the real world, there are unlikely to be semi-partial correlations

# that are exactly zero, which is the null hypothesis in testing significance of a regression coefficient."

# Formally, the standardised p-value is defined as:

# q = min(0.5, p * sqrt( (n/100) ))

# Woolley (2003): "The value of 0.5 is somewhat arbitrary, though its purpose is to avoid q-values of greater than 1."

n <- dim(profilesDF)[1]

corDatSig$value <- sapply(corDatSig$value, function(x) {

round(min(0.5, x * sqrt( (n/100) )),

digits = 2)

})

# Order the data.frame for plotting

levels(corDatSig$X1) <- rev(profileNamesList)

levels(corDatSig$X2) <- profileNamesList[-1]

# Plot

ggObj <- ggplot(data = corDat,

mapping = aes(X2, X1, fill = value)) +

geom_tile() +

# geom_text(mapping = aes(X2, X1, label = value), size = 5) +

geom_text(data = corDatSig,

mapping = aes(X2, X1, label = value), size = 8) +

scale_fill_gradient2(name = bquote("Spearman's" ~ italic(r[s])),

low = "blue", mid = "white", high = "red",

midpoint = 0, breaks = seq(-1, 1, by = 0.4), limits = c(-1, 1)) +

scale_x_discrete(expand = c(0, 0), position = "top") +

scale_y_discrete(expand = c(0, 0)) +

labs(x = "", y = "") +

guides(fill = guide_colourbar(barwidth = 40, barheight = 6,

title.position = "top", title.hjust = 0.5)) +

theme_bw() +

theme(axis.text.x = element_text(angle = 45, vjust = 0.5, hjust = 0, size = 39, colour = "black"),

axis.text.y = element_text(angle = 0, vjust = 1, hjust = 1, size = 39, colour = "black"),

panel.grid.major = element_blank(),

panel.border = element_blank(),

panel.background = element_blank(),

axis.ticks = element_blank(),

legend.title = element_text(size = 40),

legend.text = element_text(size = 40),

legend.justification = c(1, 0),

legend.position = c(0.65, 0.05),

legend.direction = "horizontal",

legend.background = element_rect(fill = "transparent"),

plot.margin = unit(c(5.5, 70.5, 5.5, 5.5), "pt"),

plot.title = element_text(hjust = 0.5, size = 30, colour = "black")) +

ggtitle(bquote(.(winSize/1e6) * "-Mb Spearman's" ~ italic(r[s]) ~ "for" ~

.(paste0(genomeName, collapse = "-, ")) * "-genome" ~

.(region) ~ "regions (" * .(smoothing) * ")"))

ggsave(paste0(plotDir,

"Spearman_correlation_matrix_", winName,

"_log2ChIPcontrol_cMMb_MNase_DNAmeth_genes_TEsuperfams_in_",

paste0(genomeName, collapse = "_"), "_genome_", region, "_", smoothing, "_qVals.pdf"),

plot = ggObj, height = 20, width = 20)

**ChIP-seq peak definition, processing and analysis**

Numbered scripts provided below were run sequentially to define and process peaks in ChIP-seq signal.

Script: 1_identify_ChIPseq_peaks.sh:

#!/bin/bash

# Call peaks in ChIP-seq signal using the ranger tool from PeakRanger v1.18

# ( http://ranger.sourceforge.net/manual1.18.html ),

# providing alignments for an ChIP input library as a background control

# Usage:

# ./1_identify_ChIPseq_peaks.sh DMC1 DMC1_Rep1_ChIP input input_SRR6350669 0.001 0.01 200 48

ChIP=$1

ChIPLibName=$2

control=$3

controlLibName=$4

pval=$5

qval=$6

fragLen=$7

threads=$8

ChIPDir="/home/ajt200/analysis/wheat/"$ChIP"/snakemake_ChIPseq/mapped/both"

controlDir="/home/ajt200/analysis/wheat/epigenomics_shoot_leaf_IWGSC_2018_Science/"$control"/snakemake_ChIPseq/mapped/both"

rangerDir="/home/ajt200/tools/PeakRanger-1.18/bin"

$rangerDir/peakranger ranger -d $ChIPDir/$ChIPLibName"_MappedOn_wheat_v1.0_lowXM_both_sort.bam" \

-c $controlDir/$controlLibName"_MappedOn_wheat_v1.0_lowXM_both_sort.bam" \

--format bam -o $ChIPLibName"_peaks_peakranger_ranger_p"$pval"_q"$qval \

-p $pval -q $qval -l $fragLen --pad -t $threads --verbose

Script: 2_convert_detailsTOnarrowPeak_format.sh:

#!/bin/bash

# Convert PeakRanger ranger peak loci details file into narrowPeak format

# However, unlike in narrowPeak format, p-values and q-values are not -log10 transformed

# -log10 transformation of these values is done by

# the R script 3_narrowPeak_minuslog10PQ_sigVal_log2ChIPreadsControlreads.R

# Usage:

# ./2_convert_detailsTOnarrowPeak_format.sh DMC1_Rep1_ChIP 0.001 0.01

ChIPLibName=$1

pval=$2

qval=$3

tail -n +24 $ChIPLibName"_peaks_peakranger_ranger_p"$pval"_q"$qval"_details" \

> $ChIPLibName"_peaks_peakranger_ranger_p"$pval"_q"$qval"_noHead"

grep -v 'chrUn' $ChIPLibName"_peaks_peakranger_ranger_p"$pval"_q"$qval"_noHead" \

> $ChIPLibName"_peaks_peakranger_ranger_p"$pval"_q"$qval"_noHead_tmp1"

awk 'BEGIN {OFS="\t"}; {$1 = $1; print}' $ChIPLibName"_peaks_peakranger_ranger_p"$pval"_q"$qval"_noHead_tmp1" \

> $ChIPLibName"_peaks_peakranger_ranger_p"$pval"_q"$qval"_noHead_tmp2"

awk 'BEGIN {OFS="\t"}; {print $1, $2, $3, $8, $8, $8, $8, $6, $7, $5, $9, $10}' $ChIPLibName"_peaks_peakranger_ranger_p"$pval"_q"$qval"_noHead_tmp2" \

> $ChIPLibName"_peaks_peakranger_ranger_p"$pval"_q"$qval"_noHead_tmp3"

awk 'BEGIN {OFS="\t"}; {$4 = "."; $5 = "."; $6 = "."; $7 = "."; $10 = $10-$2; print}' $ChIPLibName"_peaks_peakranger_ranger_p"$pval"_q"$qval"_noHead_tmp3" \

> $ChIPLibName"_peaks_peakranger_ranger_p"$pval"_q"$qval"_Treads_Creads.narrowPeak.UntransformedPQ"

rm $ChIPLibName"_peaks_peakranger_ranger_p"$pval"_q"$qval"_noHead"*

Script: 3_narrowPeak_minuslog10PQ.R:

#!/applications/R/R-3.3.2/bin/Rscript

# -log10 transform p-values and q-values for consistency with narrowPeak format conventions,

# and to be used for sorting by decreasing values for downstream motif enrichment analyses

# Define narrowPeak "signalValue" (column 7) as:

# signalValue = log2((region ChIP reads+1)/(region control reads+1))

# However, refrain from using this signalValue as it is unknown whether these read counts

# are normalized by library size by the PeakRanger ranger tool

# Usage:

# ./3_narrowPeak_minuslog10PQ.R DMC1_Rep1_ChIP 0.001 0.01

args <- commandArgs(trailingOnly = TRUE)

ChIPLibName <- args[1]

pval <- as.character(args[2])

qval <- as.character(args[3])

peaks <- read.table(paste0(ChIPLibName, "_peaks_peakranger_ranger_p",

pval, "_q", qval,

"_Treads_Creads.narrowPeak.UntransformedPQ"))

colnames(peaks) <- c("chr", "start0based", "end",

"name", "score", "strand",

"signalVal", "pValUntrans", "qValUntrans",

"summit0based", "treads", "creads")

peaks <- cbind(peaks[,1:6], log2((peaks[,11]+1)/(peaks[,12]+1)),

-log10(peaks[,8]), -log10(peaks[,9]), peaks[,10])

colnames(peaks) <- c("chr", "start0based", "end",

"name", "score", "strand",

"TreadsNormCreads", "pVal", "qVal",

"summit0based")

peaks$pVal[which(!is.finite(peaks$pVal))] <- 323

peaks$qVal[which(!is.finite(peaks$qVal))] <- 323

head(peaks)

write.table(peaks, file = paste0(ChIPLibName, "_peaks_peakranger_ranger_p",

pval, "_q", qval,

"_log2TreadsNormCreads.narrowPeak"),

col.names = F, row.names = F, sep = "\t", quote = F)

Script: 4_convert_narrowPeakToGRanges_for_regioneR.R:

#!/applications/R/R-3.3.2/bin/Rscript

# Convert narrowPeak into GRanges object (with overlapping peaks merged)

# to be provided as an input file for genomic feature overlap analyses

# with the Bioconductor package regioneR

# Usage:

# ./4_convert_narrowPeakToGRanges_for_regioneR.R DMC1_Rep1_ChIP 0.001 0.01

args <- commandArgs(trailingOnly = TRUE)

ChIPLibName <- args[1]

pval <- as.character(args[2])

qval <- as.character(args[3])

library(GenomicRanges)

rangerPeaks <- read.table(paste0(ChIPLibName,

"_peaks_peakranger_ranger_p", pval,

"_q", qval, "_TreadsNormCreads.narrowPeak"))

rangerPeaks <- cbind(rangerPeaks[,1:3],

rangerPeaks[,7:10])

colnames(rangerPeaks) <- c("chr", "start0based", "end",

"sigval", "pval", "qval", "summit0based")

rangerPeaks <- data.frame(chr = as.character(rangerPeaks$chr),

start = as.integer(rangerPeaks$start0based+1),

end = as.integer(rangerPeaks$end),

sigval = as.numeric(rangerPeaks$sigval),

pval = as.numeric(rangerPeaks$pval),

qval = as.numeric(rangerPeaks$qval),

summit0based = as.integer(rangerPeaks$summit0based))

# Create GRanges objects sorted by decreasing -log10(qval)

rangerPeaksGR <- sort(GRanges(seqnames = rangerPeaks$chr,

ranges = IRanges(start = rangerPeaks$start,

end = rangerPeaks$end),

strand = "*",

sigval = rangerPeaks$sigval,

pval = rangerPeaks$pval,

qval = rangerPeaks$qval,

summit0based = rangerPeaks$summit0based),

by = ~ qval, decreasing = T)

# Merge overlapping peaks

rangerPeaksGRmergedOverlaps <- reduce(rangerPeaksGR)

save(rangerPeaksGRmergedOverlaps,

file = paste0(ChIPLibName,

"_rangerPeaksGRmergedOverlaps_minuslog10_p", pval, "_q", qval, "_noMinWidth.RData"))

Script: 5_sort_peaks_by_minuslog10Q_for_weeder2.R:

#!/applications/R/R-3.3.2/bin/Rscript

# Extract peaks within given wheat subgenome compartments (a.k.a. partitions)

# E.g., "euchromatin" [R1 and R3 (distal)] or "heterochromatin" [R2 (interstitial) and C (proximal)]

# Order compartmentalized peaks by decreasing -log10(FDR)

# Define peak coordinates as peak summit-100 bp to peak summit+100 bp

# so that all peaks have a common width of 201 bp for weeder2 motif enrichment analysis

# Generate peak GFF3 and BED files (0-based start coordinates)

# Usage:

# ./5_sort_peaks_by_minuslog10Q_for_weeder2.R DMC1_Rep1_ChIP 'euchromatin' 'A'

library(GenomicRanges)

args <- commandArgs(trailingOnly = T)

libName <- args[1]

region <- args[2]

genomeName <- args[3]

# Genomic definitions

chrs <- as.vector(read.table("wheat_v1.0.fa.sizes")[,1])

chrs <- chrs[-length(chrs)]

chrStart <- c(rep(1, times = length(chrs)))

chrLens <- as.vector(read.table("wheat_v1.0.fa.sizes")[,2])

chrLens <- chrLens[-length(chrLens)]

centromereStart <- as.vector(read.table(paste0("chromosome_compartments/",

"centromeres_outer_CENH3enriched_IWGSC_2018_Science_Table_S11_chr4ALeftmostInterval_chr5ARightTwoIntervals.txt"))[,2])

centromereEnd <- as.vector(read.table(paste0("chromosome_compartments/",

"centromeres_outer_CENH3enriched_IWGSC_2018_Science_Table_S11_chr4ALeftmostInterval_chr5ARightTwoIntervals.txt"))[,3])

chrPartitions <- read.table(paste0("chromosome_compartments/",

"chromosome_partitions_IWGSC_2018_Science_Table_S29.txt"),

header = TRUE)

genomeGR <- GRanges(seqnames = chrs,

ranges = IRanges(start = chrStart,

end = chrLens),

strand = "*")

genomeGR <- genomeGR[grep(genomeName,

seqnames(genomeGR))@values]

regionDir <- paste0(region, "/")

system(paste0("[ -d ", regionDir, " ] || mkdir ", regionDir))

regionDir <- paste0(regionDir, "motifs_summits200bp/")

system(paste0("[ -d ", regionDir, " ] || mkdir ", regionDir))

# Define region to be analysed

if(region == "euchromatin") {

regionGR <- GRanges(seqnames = rep(chrPartitions$chrom, 2),

ranges = IRanges(start = c(rep(1, dim(chrPartitions)[1]),

chrPartitions$R2b_R3),

end = c(chrPartitions$R1_R2a,

chrLens)),

strand = "*")

regionGR <- regionGR[grep(genomeName,

seqnames(regionGR))@values]

} else if(region == "heterochromatin") {

regionGR <- GRanges(seqnames = chrPartitions$chrom,

ranges = IRanges(start = chrPartitions$R1_R2a+1,

end = chrPartitions$R2b_R3-1),

strand = "*")

regionGR <- regionGR[grep(genomeName,

seqnames(regionGR))@values]

} else if(region == "centromeres") {

regionGR <- GRanges(seqnames = chrs,

ranges = IRanges(start = centromereStart,

end = centromereEnd),

strand = "*")

regionGR <- regionGR[grep(genomeName,

seqnames(regionGR))@values]

} else if(region == "pericentromeres") {

regionGR <- GRanges(seqnames = chrPartitions$chrom,

ranges = IRanges(start = chrPartitions$R2a_C+1,

end = chrPartitions$C_R2b-1),

strand = "*")

regionGR <- regionGR[grep(genomeName,

seqnames(regionGR))@values]

} else if(region == "genomewide") {

regionGR <- GRanges(seqnames = chrs,

ranges = IRanges(start = rep(1, length(chrs)),

end = chrLens),

strand = "*")

regionGR <- regionGR[grep(genomeName,

seqnames(regionGR))@values]

} else {

stop("region is not euchromatin, heterochromatin, centromeres, pericentromeres, or genomewide")

}

# Define region to be masked out of analysis

if(region == "euchromatin") {

maskGR <- GRanges(seqnames = chrPartitions$chrom,

ranges = IRanges(start = chrPartitions$R1_R2a+1,

end = chrPartitions$R2b_R3-1),

strand = "*")

maskGR <- maskGR[grep(genomeName,

seqnames(maskGR))@values]

} else if(region == "heterochromatin") {

maskGR <- GRanges(seqnames = rep(chrPartitions$chrom, 2),

ranges = IRanges(start = c(rep(1, dim(chrPartitions)[1]),

chrPartitions$R2b_R3),

end = c(chrPartitions$R1_R2a,

chrLens)),

strand = "*")

maskGR <- maskGR[grep(genomeName,

seqnames(maskGR))@values]

} else if(region == "centromeres") {

maskGR <- GRanges(seqnames = rep(chrPartitions$chrom, 2),

ranges = IRanges(start = c(rep(1, dim(chrPartitions)[1]),

centromereEnd+1),

end = c(centromereStart-1,

chrLens)),

strand = "*")

maskGR <- maskGR[grep(genomeName,

seqnames(maskGR))@values]

} else if(region == "pericentromeres") {

maskGR <- GRanges(seqnames = rep(chrPartitions$chrom, 2),

ranges = IRanges(start = c(rep(1, dim(chrPartitions)[1]),

chrPartitions$C_R2b),

end = c(chrPartitions$R2a_C,

chrLens)),

strand = "*")

maskGR <- maskGR[grep(genomeName,

seqnames(maskGR))@values]

} else if(region == "genomewide") {

maskGR <- GRanges()

maskGR <- maskGR[grep(genomeName,

seqnames(maskGR))@values]

} else {

stop("region is not euchromatin, heterochromatin, centromeres, pericentromeres, or genomewide")

}

# Import peaks

peaks <- read.table(paste0(libName,

"_peaks_peakranger_ranger_p0.001_q0.01_log2TreadsNormCreads.narrowPeak"))

peaks <- cbind(peaks[,1:3],

peaks[,7:10])

colnames(peaks) <- c("chr", "start0based", "end",

"sigval", "pval", "qval", "summit0based")

peaks <- data.frame(chr = peaks$chr,

start = peaks$start0based+1,

end = peaks$end,

sigval = peaks$sigval,

pval = peaks$pval,

qval = peaks$qval,

summit0based = peaks$summit0based)

peaksGR <- GRanges(seqnames = peaks$chr,

ranges = IRanges(start = peaks$start,

end = peaks$end),

strand = "*",

sigval = peaks$sigval,

pval = peaks$pval,

qval = peaks$qval,

summit0based = peaks$summit0based)

peaksGR <- peaksGR[grep(genomeName,

seqnames(peaksGR))@values]

# Subset to include only those not overlapping masked region (e.g., heterochromatin)

mask_peaks_overlap <- findOverlaps(query = maskGR,

subject = peaksGR,

type = "any",

select = "all",

ignore.strand = TRUE)

peaksGR <- peaksGR[-subjectHits(mask_peaks_overlap)]

print("***********peaks***********")

print(peaksGR)

# Sort by decreasing -log10(qval)

peaksGR <- sort(peaksGR, by = ~ qval, decreasing = T)

# Define function to select randomly positioned loci of the same

# width distribution as peaksGR

ranLocStartSelect <- function(coordinates, n) {

sample(x = coordinates,

size = n,

replace = FALSE)

}

# Disable scientific notation (e.g., 59000000 rather than 5.9e+07)

options(scipen = 100)

# Define seed so that random selections are reproducible

set.seed(93750174)

# Apply ranLocStartSelect() on a per-chromosome basis so that

# ranLocGR contains the same number of loci per chromosome as peaksGR

chrs <- chrs[grep(genomeName, chrs)]

ranLocGR <- GRanges()

for(i in 1:length(chrs)) {

peaksChrGR <- peaksGR[seqnames(peaksGR) == chrs[i]]

regionChrGR <- regionGR[seqnames(regionGR) == chrs[i]]

# Contract regionChrGR so that random loci do not overlap masked region

# and do not extend beyond chromosome ends

end(regionChrGR) <- end(regionChrGR)-max(width(peaksChrGR))

ranLocChrStart <- ranLocStartSelect(coordinates = unlist(as.vector(ranges(regionChrGR))),

n = length(peaksChrGR))

ranLocChrIR <- IRanges(start = ranLocChrStart,

width = width(peaksChrGR))

ranLocChrGR <- GRanges(seqnames = chrs[i],

ranges = ranLocChrIR,

strand = "*")

ranLocGR <- append(ranLocGR, ranLocChrGR)

}

# Convert into GFF3 and BED formats

# peaks

peaks <- data.frame(peaksGR)

peaksgff <- data.frame(chr = as.character(peaks$seqnames),

source = as.character(rep(".")),

feature = as.character(rep(paste0(libName, "_peak"))),

start = as.integer(peaks$start),

end = as.integer(peaks$end),

qval = as.numeric(peaks$qval),

strand = as.character(rep(".")),

frame = as.character(rep(".")),

summit0based = as.integer(peaks$summit0based))

write.table(peaksgff,

file = paste0(libName,

"_rangerPeaksGR_minuslog10Qsorted_p0.001_q0.01_noMinWidth_in_",

genomeName, "genome_", region, ".gff"),

row.names = F, col.names = F, quote = F, sep = "\t")

peaksbed <- data.frame(chr = as.character(peaks$seqnames),

start = as.integer(peaks$start-1),

end = as.integer(peaks$end),

name = as.integer(1:length(peaks$seqnames)),

qval = as.numeric(peaks$qval),

summit0based = as.integer(peaks$summit0based))

write.table(peaksbed,

file = paste0(libName,

"_rangerPeaksGR_minuslog10Qsorted_p0.001_q0.01_noMinWidth_in_",

genomeName, "genome_", region, ".bed"),

row.names = F, col.names = F, quote = F, sep = "\t")

# Function to determine rounded midpoints of GRanges loci and to include

# flanking bases (midpoint-leftFlank bases, midpoint, midpoint+rightFlank bases)

locMidpointFlank <- function (x, leftFlank, rightFlank, ...)

{

if (any(strand(x) == "*"))

warning("'*' ranges were treated as '+'")

on_plus <- which(strand(x) == "+" | strand(x) == "*")

on_plus_start <- start(x)[on_plus]

on_plus_end <- end(x)[on_plus]

start(x)[on_plus] <- round( on_plus_start + ((on_plus_end - on_plus_start)/2) ) - leftFlank

end(x)[on_plus] <- round( on_plus_start + ((on_plus_end - on_plus_start)/2) ) + rightFlank

on_minus <- which(strand(x) == "-")

on_minus_start <- end(x)[on_minus]

on_minus_end <- start(x)[on_minus]

start(x)[on_minus] <- round( on_minus_end + ((on_minus_start - on_minus_end)/2) ) - rightFlank

end(x)[on_minus] <- round( on_minus_end + ((on_minus_start - on_minus_end)/2) ) + leftFlank

x

}

# Extract peak summits +/- 200 bp for use in weeder2 motif analysis

peaksGR_summits <- GRanges(seqnames = seqnames(peaksGR),

ranges = IRanges(start = start(peaksGR)+peaksGR$summit0based,

end = start(peaksGR)+peaksGR$summit0based),

strand = "*",

sigval = peaksGR$sigval,

pval = peaksGR$pval,

qval = peaksGR$qval,

summit0based = peaksGR$summit0based)

peaksGR_summits200bp <- locMidpointFlank(x = peaksGR_summits,

leftFlank = 100,

rightFlank = 100)

peaks_summits200bp_bed <- data.frame(chr = seqnames(peaksGR_summits200bp),

start = start(peaksGR_summits200bp)-1,

end = end(peaksGR_summits200bp),

name = paste0(as.character(seqnames(peaksGR)),

":",

as.character(start(peaksGR)),

"-",

as.character(end(peaksGR))))

write.table(peaks_summits200bp_bed,

file = paste0(region, "/motifs_summits200bp/", libName,

"_peaks_minuslog10Qsorted_in_",

genomeName, "genome_", region, "_summits200bp.bed"),

row.names = F, col.names = F, quote = F, sep = "\t")

# ranLoc

ranLoc <- data.frame(ranLocGR)

ranLocgff <- data.frame(chr = as.character(ranLoc$seqnames),

source = as.character(rep(".")),

feature = as.character(rep(paste0(libName, "_peak_ranLoc"))),

start = as.integer(ranLoc$start),

end = as.integer(ranLoc$end),

score = as.character(rep(".")),

strand = as.character(rep(".")),

frame = as.character(rep(".")),

attribute = as.character(rep(".")))

write.table(ranLocgff,

file = paste0(libName,

"_rangerPeaksGR_minuslog10Qsorted_p0.001_q0.01_noMinWidth_in_",

genomeName, "genome_", region, "_randomLoci.gff"),

row.names = F, col.names = F, quote = F, sep = "\t")

ranLocbed <- data.frame(chr = as.character(ranLoc$seqnames),

start = as.integer(ranLoc$start-1),

end = as.integer(ranLoc$end),

name = as.integer(1:length(ranLoc$seqnames)),

score = rep("NA", length(ranLoc$seqnames)),

strand = as.character(ranLoc$strand))

write.table(ranLocbed,

file = paste0(libName,

"_rangerPeaksGR_minuslog10Qsorted_p0.001_q0.01_noMinWidth_in_",

genomeName, "genome_", region, "_randomLoci.bed"),

row.names = F, col.names = F, quote = F, sep = "\t")

# Extract ranLoc summits +/- 200 bp for use in weeder2 motif analysis

ranLocGR_summits <- GRanges(seqnames = seqnames(ranLocGR),

ranges = IRanges(start = start(ranLocGR)+round((end(ranLocGR)-start(ranLocGR))/2),

end = start(ranLocGR)+round((end(ranLocGR)-start(ranLocGR))/2)),

strand = "*")

ranLocGR_summits200bp <- locMidpointFlank(x = ranLocGR_summits,

leftFlank = 100,

rightFlank = 100)

ranLoc_summits200bp_bed <- data.frame(chr = seqnames(ranLocGR_summits200bp),

start = start(ranLocGR_summits200bp)-1,

end = end(ranLocGR_summits200bp),

name = paste0(as.character(seqnames(ranLocGR)),

":",

as.character(start(ranLocGR)),

"-",

as.character(end(ranLocGR))))

write.table(ranLoc_summits200bp_bed,

file = paste0(region, "/motifs_summits200bp/", libName,

"_peaks_minuslog10Qsorted_in_",

genomeName, "genome_", region, "_summits200bp_randomLoci.bed"),

row.names = F, col.names = F, quote = F, sep = "\t")

Script: 6_get_peaks_in_compartments_for_metaprofiling.R:

#!/applications/R/R-3.5.0/bin/Rscript

# Extract peaks within given wheat subgenome compartments (a.k.a. partitions); e.g.,

# 1. R1 and R3 (distal or "euchromatin")

# 2. R2a and R2b (interstitial)

# 3. C (proximal)

# 4. heterochromatin (interstitial and proximal)

# 5. centromeres (defined by IWGSC (2018) Science 361 using CENH3 ChIP-seq data from Guo et al. (2016) PLOS Genet. 12)

# Write in GFF and BED formats

# Usage:

# ./6_get_peaks_in_compartments_for_metaprofiling.R DMC1_Rep1_ChIP 'distal' 'A'

args <- commandArgs(trailingOnly = T)

libName <- args[1]

region <- args[2]

genomeName <- args[3]

library(GenomicRanges)

# Genomic definitions

chrs <- as.vector(read.table("wheat_v1.0.fa.sizes")[,1])

chrs <- chrs[-length(chrs)]

chrStart <- c(rep(1, times = length(chrs)))

chrLens <- as.vector(read.table("wheat_v1.0.fa.sizes")[,2])

chrLens <- chrLens[-length(chrLens)]

centromereStart <- as.vector(read.table(paste0("chromosome_compartments/",

"centromeres_outer_CENH3enriched_IWGSC_2018_Science_Table_S11_chr4ALeftmostInterval_chr5ARightTwoIntervals.txt"))[,2])

centromereEnd <- as.vector(read.table(paste0("chromosome_compartments/",

"centromeres_outer_CENH3enriched_IWGSC_2018_Science_Table_S11_chr4ALeftmostInterval_chr5ARightTwoIntervals.txt"))[,3])

chrPartitions <- read.table(paste0("chromosome_compartments/",

"chromosome_partitions_IWGSC_2018_Science_Table_S29.txt"),

header = TRUE)

genomeGR <- GRanges(seqnames = chrs,

ranges = IRanges(start = chrStart,

end = chrLens),

strand = "*")

genomeGR <- genomeGR[grep(genomeName,

seqnames(genomeGR))@values]

# Define region to be analysed

if(region == "distal") {

regionGR <- GRanges(seqnames = rep(chrPartitions$chrom, 2),

ranges = IRanges(start = c(rep(1, dim(chrPartitions)[1]),

chrPartitions$R2b_R3),

end = c(chrPartitions$R1_R2a,

chrLens)),

strand = "*")

regionGR <- regionGR[grep(genomeName,

seqnames(regionGR))@values]

} else if(region == "interstitial") {

regionGR <- GRanges(seqnames = rep(chrPartitions$chrom, 2),

ranges = IRanges(start = c(chrPartitions$R1_R2a+1,

chrPartitions$C_R2b),

end = c(chrPartitions$R2a_C,

chrPartitions$R2b_R3-1)),

strand = "*")

regionGR <- regionGR[grep(genomeName,

seqnames(regionGR))@values]

} else if(region == "proximal") {

regionGR <- GRanges(seqnames = chrPartitions$chrom,

ranges = IRanges(start = chrPartitions$R2a_C+1,

end = chrPartitions$C_R2b-1),

strand = "*")

regionGR <- regionGR[grep(genomeName,

seqnames(regionGR))@values]

} else if(region == "heterochromatin") {

regionGR <- GRanges(seqnames = chrPartitions$chrom,

ranges = IRanges(start = chrPartitions$R1_R2a+1,

end = chrPartitions$R2b_R3-1),

strand = "*")

regionGR <- regionGR[grep(genomeName,

seqnames(regionGR))@values]

} else if(region == "centromeres") {

regionGR <- GRanges(seqnames = chrs,

ranges = IRanges(start = centromereStart,

end = centromereEnd),

strand = "*")

regionGR <- regionGR[grep(genomeName,

seqnames(regionGR))@values]

} else if(region == "genomewide") {

regionGR <- GRanges(seqnames = chrs,

ranges = IRanges(start = rep(1, length(chrs)),

end = chrLens),

strand = "*")

regionGR <- regionGR[grep(genomeName,

seqnames(regionGR))@values]

} else {

stop("region is not distal, interstitial, proximal, heterochromatin, centromeres, or genomewide")

}

# Define region to be masked out of analysis

if(region == "distal") {

maskGR <- GRanges(seqnames = chrPartitions$chrom,

ranges = IRanges(start = chrPartitions$R1_R2a+1,

end = chrPartitions$R2b_R3-1),

strand = "*")

maskGR <- maskGR[grep(genomeName,

seqnames(maskGR))@values]

} else if(region == "interstitial") {

maskGR <- GRanges(seqnames = rep(chrPartitions$chrom, 3),

ranges = IRanges(start = c(rep(1, dim(chrPartitions)[1]),

chrPartitions$R2a_C+1,

chrPartitions$R2b_R3),

end = c(chrPartitions$R1_R2a,

chrPartitions$C_R2b-1,

chrLens)),

strand = "*")

maskGR <- maskGR[grep(genomeName,

seqnames(maskGR))@values]

} else if(region == "proximal") {

maskGR <- GRanges(seqnames = rep(chrPartitions$chrom, 2),

ranges = IRanges(start = c(rep(1, dim(chrPartitions)[1]),

chrPartitions$C_R2b),

end = c(chrPartitions$R2a_C,

chrLens)),

strand = "*")

maskGR <- maskGR[grep(genomeName,

seqnames(maskGR))@values]

} else if(region == "heterochromatin") {

maskGR <- GRanges(seqnames = rep(chrPartitions$chrom, 2),

ranges = IRanges(start = c(rep(1, dim(chrPartitions)[1]),

chrPartitions$R2b_R3),

end = c(chrPartitions$R1_R2a,

chrLens)),

strand = "*")

maskGR <- maskGR[grep(genomeName,

seqnames(maskGR))@values]

} else if(region == "centromeres") {

maskGR <- GRanges(seqnames = rep(chrPartitions$chrom, 2),

ranges = IRanges(start = c(rep(1, dim(chrPartitions)[1]),

centromereEnd+1),

end = c(centromereStart-1,

chrLens)),

strand = "*")

maskGR <- maskGR[grep(genomeName,

seqnames(maskGR))@values]

} else if(region == "genomewide") {

maskGR <- GRanges()

maskGR <- maskGR[grep(genomeName,

seqnames(maskGR))@values]

} else {

stop("region is not distal, interstitial, proximal, heterochromatin, centromeres, or genomewide")

}

# Import peaks as GRanges object

load(paste0(libName, "_rangerPeaksGRmergedOverlaps_minuslog10_p0.001_q0.01_noMinWidth.RData"))

peaksGR <- rangerPeaksGRmergedOverlaps

rangerPeaksGRmergedOverlaps <- NULL

peaksGR <- peaksGR[grep(genomeName,

seqnames(peaksGR))@values]

# Subset to include only those not overlapping masked region (e.g., heterochromatin)

mask_peaks_overlap <- findOverlaps(query = maskGR,

subject = peaksGR,

type = "any",

select = "all",

ignore.strand = TRUE)

peaksGR <- peaksGR[-subjectHits(mask_peaks_overlap)]

strand(peaksGR) <- "*"

print("***********peaks***********")

print(peaksGR)

# Define function to select randomly positioned loci of the same

# width distribution as peaksGR

ranLocStartSelect <- function(coordinates, n) {

sample(x = coordinates,

size = n,

replace = FALSE)

}

# Disable scientific notation (e.g., 59000000 rather than 5.9e+07)

options(scipen = 100)

# Define seed so that random selections are reproducible

set.seed(93750174)

# Apply ranLocStartSelect() on a per-chromosome basis so that

# ranLocGR contains the same number of loci per chromosome as peaksGR

chrs <- chrs[grep(genomeName, chrs)]

ranLocGR <- GRanges()

for(i in 1:length(chrs)) {

peaksChrGR <- peaksGR[seqnames(peaksGR) == chrs[i]]

regionChrGR <- regionGR[seqnames(regionGR) == chrs[i]]

# Contract regionChrGR so that random loci do not overlap masked region

# and do not extend beyond chromosome ends

end(regionChrGR) <- end(regionChrGR)-max(width(peaksChrGR))

ranLocChrStart <- ranLocStartSelect(coordinates = unlist(lapply(seq_along(regionChrGR), function(x) {

start(regionChrGR[x]) : end(regionChrGR[x])

})),

n = length(peaksChrGR))

ranLocChrIR <- IRanges(start = ranLocChrStart,

width = width(peaksChrGR))

ranLocChrGR <- GRanges(seqnames = chrs[i],

ranges = ranLocChrIR,

strand = "*")

ranLocGR <- append(ranLocGR, ranLocChrGR)

}

# Convert into GFF3 and BED formats

# peaks

peaks <- data.frame(peaksGR)

peaksgff <- data.frame(chr = as.character(peaks$seqnames),

source = as.character(rep(".")),

feature = as.character(rep(paste0(libName, "_", region, "_peak"))),

start = as.integer(peaks$start),

end = as.integer(peaks$end),

score = as.character(rep(".")),

strand = as.character(rep(".")),

frame = as.character(rep(".")),

attribute = as.character(rep(".")))

write.table(peaksgff,

file = paste0(libName,

"_rangerPeaksGRmergedOverlaps_minuslog10_p0.001_q0.01_noMinWidth_in_",

genomeName, "genome_", region, ".gff"),

row.names = F, col.names = F, quote = F, sep = "\t")

peaksbed <- data.frame(chr = as.character(peaks$seqnames),

start = as.integer(peaks$start-1),

end = as.integer(peaks$end),

name = as.integer(1:length(peaks$seqnames)),

score = rep("NA", length(peaks$seqnames)),

strand = as.character(peaks$strand))

write.table(peaksbed,

file = paste0(libName,

"_rangerPeaksGRmergedOverlaps_minuslog10_p0.001_q0.01_noMinWidth_in_",

genomeName, "genome_", region, ".bed"),

row.names = F, col.names = F, quote = F, sep = "\t")

# ranLoc

ranLoc <- data.frame(ranLocGR)

ranLocgff <- data.frame(chr = as.character(ranLoc$seqnames),

source = as.character(rep(".")),

feature = as.character(rep(paste0(libName, "_", region, "_ranLoc"))),

start = as.integer(ranLoc$start),

end = as.integer(ranLoc$end),

score = as.character(rep(".")),

strand = as.character(rep(".")),

frame = as.character(rep(".")),

attribute = as.character(rep(".")))

write.table(ranLocgff,

file = paste0(libName,

"_rangerPeaksGRmergedOverlaps_minuslog10_p0.001_q0.01_noMinWidth_in_",

genomeName, "genome_", region, "_randomLoci.gff"),

row.names = F, col.names = F, quote = F, sep = "\t")

ranLocbed <- data.frame(chr = as.character(ranLoc$seqnames),

start = as.integer(ranLoc$start-1),

end = as.integer(ranLoc$end),

name = as.integer(1:length(ranLoc$seqnames)),

score = rep("NA", length(ranLoc$seqnames)),

strand = as.character(ranLoc$strand))

write.table(ranLocbed,

file = paste0(libName,

"_rangerPeaksGRmergedOverlaps_minuslog10_p0.001_q0.01_noMinWidth_in_",

genomeName, "genome_", region, "_randomLoci.bed"),

row.names = F, col.names = F, quote = F, sep = "\t")

Scripts for evaluating ChIP-seq peak overlaps with other features are provided below.

Script: DMC1_peaks_overlap_permTests_otherFeatures.R:

#!/applications/R/R-3.3.2/bin/Rscript

# Use permutation test function in regioneR to determine if

# DMC1 ChIP-seq peaks overlap features of interest

# (e.g., peaks in other ChIP-seq data sets , genes, TEs)

# more or less than expected by chance

# Usage:

# /applications/R/R-3.3.2/bin/Rscript DMC1_peaks_overlap_permTests_otherFeatures.R DMC1_Rep1_ChIP 10000 'euchromatin' 'A'"

args <- commandArgs(trailingOnly = TRUE)

libNameChIP <- args[1]

perms <- as.numeric(args[2])

region <- args[3]

genomeName <- args[4]

library(regioneR)

plotDir <- "plots/"

system(paste0("[ -d ", plotDir, " ] || mkdir ", plotDir))

# Genomic definitions

chrs <- as.vector(read.table("wheat_v1.0.fa.sizes")[,1])

chrs <- chrs[-length(chrs)]

chrStart <- c(rep(1, times = length(chrs)))

chrLens <- as.vector(read.table("wheat_v1.0.fa.sizes")[,2])

chrLens <- chrLens[-length(chrLens)]

centromereStart <- as.vector(read.table(paste0("chromosome_compartments/",

"centromeres_outer_CENH3enriched_IWGSC_2018_Science_Table_S11_chr4AL

eftmostInterval_chr5ARightTwoIntervals.txt"))[,2])

centromereEnd <- as.vector(read.table(paste0("chromosome_compartments/",

"centromeres_outer_CENH3enriched_IWGSC_2018_Science_Table_S11_chr4ALeftmostInterval_chr5ARightTwoIntervals.txt"))[,3])

chrPartitions <- read.table(paste0("chromosome_compartments/",

"chromosome_partitions_IWGSC_2018_Science_Table_S29.txt"),

header = TRUE)

genomeGR <- GRanges(seqnames = chrs,

ranges = IRanges(start = chrStart,

end = chrLens),

strand = "*")

genomeGR <- genomeGR[grep(genomeName,

seqnames(genomeGR))@values]

# Define region to be analysed

if(region == "euchromatin") {

regionGR <- GRanges(seqnames = rep(chrPartitions$chrom, 2),

ranges = IRanges(start = c(rep(1, dim(chrPartitions)[1]),

chrPartitions$R2b_R3),

end = c(chrPartitions$R1_R2a,

chrLens)),

strand = "*")

regionGR <- regionGR[grep(genomeName,

seqnames(regionGR))@values]

} else if(region == "heterochromatin") {

regionGR <- GRanges(seqnames = chrPartitions$chrom,

ranges = IRanges(start = chrPartitions$R1_R2a+1,

end = chrPartitions$R2b_R3-1),

strand = "*")

regionGR <- regionGR[grep(genomeName,

seqnames(regionGR))@values]

} else if(region == "genomewide") {

regionGR <- GRanges(seqnames = chrs,

ranges = IRanges(start = rep(1, length(chrs)),

end = chrLens),

strand = "*")

regionGR <- regionGR[grep(genomeName,

seqnames(regionGR))@values]

} else {

stop("region is not euchromatin, heterochromatin or genomewide")

}

# Define region to be masked out of analysis

if(region == "euchromatin") {

maskGR <- GRanges(seqnames = chrPartitions$chrom,

ranges = IRanges(start = chrPartitions$R1_R2a+1,

end = chrPartitions$R2b_R3-1),

strand = "*")

maskGR <- maskGR[grep(genomeName,

seqnames(maskGR))@values]

} else if(region == "heterochromatin") {

maskGR <- GRanges(seqnames = rep(chrPartitions$chrom, 2),

ranges = IRanges(start = c(rep(1, dim(chrPartitions)[1]),

chrPartitions$R2b_R3),

end = c(chrPartitions$R1_R2a,

chrLens)),

strand = "*")

maskGR <- maskGR[grep(genomeName,

seqnames(maskGR))@values]

} else if(region == "genomewide") {

maskGR <- GRanges()

maskGR <- maskGR[grep(genomeName,

seqnames(maskGR))@values]

} else {

stop("region is not euchromatin, heterochromatin or genomewide")

}

# Import peaks as GRanges object

load(paste0(libNameChIP,

"_rangerPeaksGRmergedOverlaps_minuslog10_p0.001_q0.01_noMinWidth.RData"))

peaksGR <- rangerPeaksGRmergedOverlaps

rangerPeaksGRmergedOverlaps <- NULL

peaksGR <- peaksGR[grep(genomeName,

seqnames(peaksGR))@values]

# Subset to include only those not overlapping masked region (e.g., heterochromatin)

mask_peaks_overlap <- findOverlaps(query = maskGR,

subject = peaksGR,

type = "any",

select = "all",

ignore.strand = TRUE)

peaksGR <- peaksGR[-subjectHits(mask_peaks_overlap)]

strand(peaksGR) <- "*"

print("***********peaks***********")

print(peaksGR)

# ASY1

load("/home/ajt200/analysis/wheat/ASY1_CS/snakemake_ChIPseq/mapped/both/peaks/PeakRanger1.18/ranger/p0.001_q0.01/ASY1_CS_Rep1_ChIP_rangerPeaksGRmergedOverlaps_minuslog10_p0.001_q0.01_noMinWidth.RData")

ASY1GR <- rangerPeaksGRmergedOverlaps

rangerPeaksGRmergedOverlaps <- NULL

ASY1GR <- ASY1GR[grep(genomeName,

seqnames(ASY1GR))@values]

# Subset to include only those not overlapping masked region (e.g., heterochromatin)

mask_peaks_overlap <- findOverlaps(query = maskGR,

subject = ASY1GR,

type = "any",

select = "all",

ignore.strand = TRUE)

ASY1GR <- ASY1GR[-subjectHits(mask_peaks_overlap)]

strand(ASY1GR) <- "*"

print("***********ASY1***********")

print(ASY1GR)

# H3K4me3

load("/home/ajt200/analysis/wheat/H3K4me3/snakemake_ChIPseq/mapped/both/peaks/PeakRanger1.18/ranger/p0.05_q0.05/H3K4me3_Rep1_ChIP_rangerPeaksGRmergedOverlaps_minuslog10_p0.05_q0.05_noMinWidth.RData")

H3K4me3GR <- rangerPeaksGRmergedOverlaps

rangerPeaksGRmergedOverlaps <- NULL

H3K4me3GR <- H3K4me3GR[grep(genomeName,

seqnames(H3K4me3GR))@values]

# Subset to include only those not overlapping masked region

mask_H3K4me3_overlap <- findOverlaps(query = maskGR,

subject = H3K4me3GR,

type = "any",

select = "all",

ignore.strand = TRUE)

H3K4me3GR <- H3K4me3GR[-subjectHits(mask_H3K4me3_overlap)]

strand(H3K4me3GR) <- "*"

print("***********H3K4me3***********")

print(H3K4me3GR)

# H3K9me2

load("/home/ajt200/analysis/wheat/H3K9me2/snakemake_ChIPseq/mapped/both/peaks/PeakRanger1.18/ranger/p0.05_q0.05/H3K9me2_Rep1_ChIP_rangerPeaksGRmergedOverlaps_minuslog10_p0.05_q0.05_noMinWidth.RData")

H3K9me2GR <- rangerPeaksGRmergedOverlaps

rangerPeaksGRmergedOverlaps <- NULL

H3K9me2GR <- H3K9me2GR[grep(genomeName,

seqnames(H3K9me2GR))@values]

# Subset to include only those not overlapping masked region

mask_H3K9me2_overlap <- findOverlaps(query = maskGR,

subject = H3K9me2GR,

type = "any",

select = "all",

ignore.strand = TRUE)

H3K9me2GR <- H3K9me2GR[-subjectHits(mask_H3K9me2_overlap)]

strand(H3K9me2GR) <- "*"

print("***********H3K9me2***********")

print(H3K9me2GR)

# H3K27me1

load("/home/ajt200/analysis/wheat/H3K27me1/snakemake_ChIPseq/mapped/both/peaks/PeakRanger1.18/ranger/p0.05_q0.05/H3K27me1_Rep1_ChIP_rangerPeaksGRmergedOverlaps_minuslog10_p0.05_q0.05_noMinWidth.RData")

H3K27me1GR <- rangerPeaksGRmergedOverlaps

rangerPeaksGRmergedOverlaps <- NULL

H3K27me1GR <- H3K27me1GR[grep(genomeName,

seqnames(H3K27me1GR))@values]

# Subset to include only those not overlapping masked region

mask_H3K27me1_overlap <- findOverlaps(query = maskGR,

subject = H3K27me1GR,

type = "any",

select = "all",

ignore.strand = TRUE)

H3K27me1GR <- H3K27me1GR[-subjectHits(mask_H3K27me1_overlap)]

strand(H3K27me1GR) <- "*"

print("***********H3K27me1***********")

print(H3K27me1GR)

# H3K27me3

load("/home/ajt200/analysis/wheat/epigenomics_shoot_leaf_IWGSC_2018_Science/H3K27me3/snakemake_ChIPseq/mapped/both/peaks/PeakRanger1.18/ranger/p0.05_q0.05/H3K27me3_ChIP_SRR6350666_rangerPeaksGRmergedOverlaps_minuslog10_p0.05_q0.05_noMinWidth.RData")

H3K27me3GR <- rangerPeaksGRmergedOverlaps

rangerPeaksGRmergedOverlaps <- NULL

H3K27me3GR <- H3K27me3GR[grep(genomeName,

seqnames(H3K27me3GR))@values]

# Subset to include only those not overlapping masked region

mask_H3K27me3_overlap <- findOverlaps(query = maskGR,

subject = H3K27me3GR,

type = "any",

select = "all",

ignore.strand = TRUE)

H3K27me3GR <- H3K27me3GR[-subjectHits(mask_H3K27me3_overlap)]

strand(H3K27me3GR) <- "*"

print("***********H3K27me3***********")

print(H3K27me3GR)

# H3K36me3

load("/home/ajt200/analysis/wheat/epigenomics_shoot_leaf_IWGSC_2018_Science/H3K36me3/snakemake_ChIPseq/mapped/both/peaks/PeakRanger1.18/ranger/p0.05_q0.05/H3K36me3_ChIP_SRR6350670_rangerPeaksGRmergedOverlaps_minuslog10_p0.05_q0.05_noMinWidth.RData")

H3K36me3GR <- rangerPeaksGRmergedOverlaps

rangerPeaksGRmergedOverlaps <- NULL

H3K36me3GR <- H3K36me3GR[grep(genomeName,

seqnames(H3K36me3GR))@values]

# Subset to include only those not overlapping masked region

mask_H3K36me3_overlap <- findOverlaps(query = maskGR,

subject = H3K36me3GR,

type = "any",

select = "all",

ignore.strand = TRUE)

H3K36me3GR <- H3K36me3GR[-subjectHits(mask_H3K36me3_overlap)]

strand(H3K36me3GR) <- "*"

print("***********H3K36me3***********")

print(H3K36me3GR)

# H3K9ac

load("/home/ajt200/analysis/wheat/epigenomics_shoot_leaf_IWGSC_2018_Science/H3K9ac/snakemake_ChIPseq/mapped/both/peaks/PeakRanger1.18/ranger/p0.05_q0.05/H3K9ac_ChIP_SRR6350667_rangerPeaksGRmergedOverlaps_minuslog10_p0.05_q0.05_noMinWidth.RData")

H3K9acGR <- rangerPeaksGRmergedOverlaps

rangerPeaksGRmergedOverlaps <- NULL

H3K9acGR <- H3K9acGR[grep(genomeName,

seqnames(H3K9acGR))@values]

# Subset to include only those not overlapping masked region

mask_H3K9ac_overlap <- findOverlaps(query = maskGR,

subject = H3K9acGR,

type = "any",

select = "all",

ignore.strand = TRUE)

H3K9acGR <- H3K9acGR[-subjectHits(mask_H3K9ac_overlap)]

strand(H3K9acGR) <- "*"

print("***********H3K9ac***********")

print(H3K9acGR)

# H3K4me1

load("/home/ajt200/analysis/wheat/epigenomics_seedlings_Li_2019_Genome_Biol/H3K4me1/snakemake_ChIPseq/mapped/both/peaks/PeakRanger1.18/ranger/p0.05_q0.05/H3K4me1_Rep1_ChIP_SRR8126618_rangerPeaksGRmergedOverlaps_minuslog10_p0.05_q0.05_noMinWidth.RData")

H3K4me1GR <- rangerPeaksGRmergedOverlaps

rangerPeaksGRmergedOverlaps <- NULL

H3K4me1GR <- H3K4me1GR[grep(genomeName,

seqnames(H3K4me1GR))@values]

# Subset to include only those not overlapping masked region

mask_H3K4me1_overlap <- findOverlaps(query = maskGR,

subject = H3K4me1GR,

type = "any",

select = "all",

ignore.strand = TRUE)

H3K4me1GR <- H3K4me1GR[-subjectHits(mask_H3K4me1_overlap)]

strand(H3K4me1GR) <- "*"

print("***********H3K4me1***********")

print(H3K4me1GR)

# H3K27ac

load("/home/ajt200/analysis/wheat/epigenomics_seedlings_Li_2019_Genome_Biol/H3K27ac/snakemake_ChIPseq/mapped/both/peaks/PeakRanger1.18/ranger/p0.05_q0.05/H3K27ac_Rep1_ChIP_SRR8126621_rangerPeaksGRmergedOverlaps_minuslog10_p0.05_q0.05_noMinWidth.RData")

H3K27acGR <- rangerPeaksGRmergedOverlaps

rangerPeaksGRmergedOverlaps <- NULL

H3K27acGR <- H3K27acGR[grep(genomeName,

seqnames(H3K27acGR))@values]

# Subset to include only those not overlapping masked region

mask_H3K27ac_overlap <- findOverlaps(query = maskGR,

subject = H3K27acGR,

type = "any",

select = "all",

ignore.strand = TRUE)

H3K27acGR <- H3K27acGR[-subjectHits(mask_H3K27ac_overlap)]

strand(H3K27acGR) <- "*"

print("***********H3K27ac***********")

print(H3K27acGR)

# MNase

load("/home/ajt200/analysis/wheat/MNase/snakemake_ChIPseq/mapped/both/peaks/PeakRanger1.18/ranger/p0.001_q0.01/MNase_Rep1_rangerPeaksGRmergedOverlaps_minuslog10_p0.001_q0.01_noMinWidth.RData")

MNaseGR <- rangerPeaksGRmergedOverlaps

rangerPeaksGRmergedOverlaps <- NULL

MNaseGR <- MNaseGR[grep(genomeName,

seqnames(MNaseGR))@values]

# Subset to include only those not overlapping masked region

mask_MNase_overlap <- findOverlaps(query = maskGR,

subject = MNaseGR,

type = "any",

select = "all",

ignore.strand = TRUE)

MNaseGR <- MNaseGR[-subjectHits(mask_MNase_overlap)]

strand(MNaseGR) <- "*"

print("***********MNase***********")

print(MNaseGR)

# genes

genes <- read.table("/home/ajt200/analysis/wheat/annotation/221118_download/iwgsc_refseqv1.1_genes_2017July06/IWGSC_v1.1_HC_20170706_representative_mRNA.gff3",

colClasses = c(NA,

rep("NULL", 2),

rep(NA, 2),

"NULL", NA, "NULL", NA))

colnames(genes) <- c("chr", "start", "end", "strand", "geneID")

genes <- genes[genes$chr != "chrUn",]

genesGR <- GRanges(seqnames = genes$chr,

ranges = IRanges(start = genes$start,

end = genes$end),

strand = genes$strand)

genesGR <- genesGR[grep(genomeName,

seqnames(genesGR))@values]

# Subset to include only those not overlapping masked region

mask_genes_overlap <- findOverlaps(query = maskGR,

subject = genesGR,

type = "any",

select = "all",

ignore.strand = TRUE)

genesGR <- genesGR[-subjectHits(mask_genes_overlap)]

# Retain strand information until after obtaining promoters, etc.

# Obtain 1000-bp gene promoters

promotersGR <- promoters(genesGR, upstream = 1000, downstream = 0)

strand(promotersGR) <- "*"

print(promotersGR)

# Obtain regions immediately downstream of gene TSSs (TSS to TSS+499 bp)

TSSsGR <- promoters(genesGR, upstream = 0, downstream = 500)

strand(TSSsGR) <- "*"

print(TSSsGR)

# Obtain regions immediately upstream of gene TTSs (TTS to TTS-499 bp)

source("/projects/ajt200/Rfunctions/TTSplus.R")

TTSsGR <- TTSplus(genesGR, upstream = 499, downstream = 0)

strand(TTSsGR) <- "*"

print(TTSsGR)

# Obtain 1000-bp gene terminators

terminatorsGR <- TTSplus(genesGR, upstream = -1, downstream = 1000)

strand(terminatorsGR) <- "*"

print(terminatorsGR)

# Remove strand information from genesGR

strand(genesGR) <- "*"

print(genesGR)

# NLRs

NLRs <- read.table(paste0("/home/ajt200/analysis/wheat/annotation/221118_download/iwgsc_refseqv1.1_genes_2017July06/",

"NLRs_Steuernagel_Wulff_2020_Plant_Physiol/NLR_genes_complete_representative_mRNA.gff3"),

colClasses = c(NA,

rep("NULL", 2),

rep(NA, 2),

"NULL", NA, "NULL", NA))

NLRs$V9 <- sub(pattern = "\\.\\d+", replacement = "",

x = NLRs$V9)

colnames(NLRs) <- c("chr", "start", "end", "strand", "geneID")

NLRs <- NLRs[NLRs$chr != "chrUn",]

geneIDs <- sub(pattern = "\\.\\d+", replacement = "",

x = genes$geneID)

NLRs <- NLRs[NLRs$geneID %in% geneIDs,]

NLRsGR <- GRanges(seqnames = NLRs$chr,

ranges = IRanges(start = NLRs$start,

end = NLRs$end),

strand = NLRs$strand)

NLRsGR <- NLRsGR[grep(genomeName,

seqnames(NLRsGR))@values]

# Subset to include only those not overlapping masked region

mask_NLRs_overlap <- findOverlaps(query = maskGR,

subject = NLRsGR,

type = "any",

select = "all",

ignore.strand = TRUE)

NLRsGR <- NLRsGR[-subjectHits(mask_NLRs_overlap)]

# Retain strand information until after obtaining promoters, etc.

# Obtain 1000-bp gene promoters

NLRpromotersGR <- promoters(NLRsGR, upstream = 1000, downstream = 0)

strand(NLRpromotersGR) <- "*"

print(NLRpromotersGR)

# Obtain regions immediately downstream of gene TSSs (TSS to TSS+499 bp)

NLRTSSsGR <- promoters(NLRsGR, upstream = 0, downstream = 500)

strand(NLRTSSsGR) <- "*"

print(NLRTSSsGR)

# Obtain regions immediately upstream of gene TTSs (TTS to TTS-499 bp)

source("/projects/ajt200/Rfunctions/TTSplus.R")

NLRTTSsGR <- TTSplus(NLRsGR, upstream = 499, downstream = 0)

strand(NLRTTSsGR) <- "*"

print(NLRTTSsGR)

# Obtain 1000-bp gene terminators

NLRterminatorsGR <- TTSplus(NLRsGR, upstream = -1, downstream = 1000)

strand(NLRterminatorsGR) <- "*"

print(NLRterminatorsGR)

# Remove strand information from NLRsGR

strand(NLRsGR) <- "*"

print(NLRsGR)

# meio

# Note: these two sets of meiotic genes share 271 common genes that are assigned to a chromosome

meio1 <- read.table("/home/ajt200/analysis/wheat/RNAseq_meiocyte_Alabdullah_Moore_2019_FrontPlantSci/Table_S4_meiotic_GO_genes.tsv",

header = T, stringsAsFactors = F)$Gene.ID

meio2 <- read.table("/home/ajt200/analysis/wheat/RNAseq_meiocyte_Alabdullah_Moore_2019_FrontPlantSci/Table_S4_meiotic_gene_orthologs.tsv",

header = T, sep = "\t", stringsAsFactors = F)$Gene.ID

meio <- unique(c(meio1, meio2))

print(length(meio))

#[1] 1063

meio <- genes[sub(pattern = "\\.\\d+", replacement = "",

x = genes$geneID) %in% meio,]

print(dim(meio))

#[1] 1059 5

# Redundant but does no harm

meio <- meio[meio$chr != "chrUn",]

print(dim(meio))

#[1] 1059 5

# Convert into GRanges

meioGR <- GRanges(seqnames = meio$chr,

ranges = IRanges(start = meio$start,

end = meio$end),

strand = meio$strand)

meioGR <- meioGR[grep(genomeName,

seqnames(meioGR))@values]

# Subset to include only those not overlapping masked region

mask_meio_overlap <- findOverlaps(query = maskGR,

subject = meioGR,

type = "any",

select = "all",

ignore.strand = TRUE)

meioGR <- meioGR[-subjectHits(mask_meio_overlap)]

# Retain strand information until after obtaining promoters, etc.

# Obtain 1000-bp gene promoters

meiopromotersGR <- promoters(meioGR, upstream = 1000, downstream = 0)

strand(meiopromotersGR) <- "*"

print(meiopromotersGR)

# Obtain regions immediately downstream of gene TSSs (TSS to TSS+499 bp)

meioTSSsGR <- promoters(meioGR, upstream = 0, downstream = 500)

strand(meioTSSsGR) <- "*"

print(meioTSSsGR)

# Obtain regions immediately upstream of gene TTSs (TTS to TTS-499 bp)

source("/projects/ajt200/Rfunctions/TTSplus.R")

meioTTSsGR <- TTSplus(meioGR, upstream = 499, downstream = 0)

strand(meioTTSsGR) <- "*"

print(meioTTSsGR)

# Obtain 1000-bp gene terminators

meioterminatorsGR <- TTSplus(meioGR, upstream = -1, downstream = 1000)

strand(meioterminatorsGR) <- "*"

print(meioterminatorsGR)

# Remove strand information from meioGR

strand(meioGR) <- "*"

print(meioGR)

## TEs

#TEdir <- "/home/ajt200/analysis/wheat/featureProfiles/TEs/"

#TEs <- read.table(paste0(TEdir,

# "iwgsc_refseqv1.0_TransposableElements_2017Mar13.bed"),

# header = F)

#TEsGR <- GRanges(seqnames = TEs$V1,

# ranges = IRanges(start = TEs$V2+1,

# end = TEs$V3),

# strand = "*")

#TEsGR <- TEsGR[grep(genomeName,

# seqnames(TEsGR))@values]

## Subset to include only those not overlapping masked region

#mask_TEs_overlap <- findOverlaps(query = maskGR,

# subject = TEsGR,

# type = "any",

# select = "all",

# ignore.strand = TRUE)

#TEsGR <- TEsGR[-subjectHits(mask_TEs_overlap)]

#print(TEsGR)

#

#otherNames2 <- c(

# "CACTA_DTC",

# "Harbinger_DTH",

# "hAT_DTA",

# "Helitrons_DHH",

# "Mariner_DTT",

# "Mutator_DTM",

# "Unclassified_class_2_DXX",

# "Unclassified_with_TIRs_DTX",

# "MITE_DMI",

# "Copia_LTR_RLC",

# "Gypsy_LTR_RLG",

# "LINE_RIX",

# "SINE_SIX",

# "Unclassified_LTR_RLX",

# "Unclassified_repeats_XXX"

# )

#TEfamNames <- c(

# "CACTA_DTC",

# "Harbinger_DTH",

# "hAT_DTA",

# "Helitrons_DHH",

# "Mariner_DTT",

# "Mutator_DTM",

# "Unclassified_class_2_DXX",

# "Unclassified_with_TIRs_DTX",

# "MITE_DMI",

# "Copia_LTR_RLC",

# "Gypsy_LTR_RLG",

# "LINE_RIX",

# "SINE_SIX",

# "Unclassified_LTR_RLX",

# "Unclassified_repeats_XXX"

# )

#

#TEdir2 <- "/home/ajt200/analysis/wheat/featureProfiles/TEs/superfamilies/"

#

#### TEs

#othersGRL2 <- lapply(seq_along(TEfamNames), function(x) {

# TEs <- read.table(paste0(TEdir,

# "iwgsc_refseqv1.0_TransposableElements_2017Mar13_superfamily_",

# TEfamNames[x], ".bed"), header = F)

# TEsGRtmp <- GRanges(seqnames = TEs$V1,

# ranges = IRanges(start = TEs$V2+1,

# end = TEs$V3),

# strand = "*")

# TEsGRtmp <- TEsGRtmp[grep(genomeName,

# seqnames(TEsGRtmp))@values]

# # Subset to include only those not overlapping masked region

# mask_TEstmp_overlap <- findOverlaps(query = maskGR,

# subject = TEsGRtmp,

# type = "any",

# select = "all",

# ignore.strand = TRUE)

# TEsGRtmp[-subjectHits(mask_TEstmp_overlap)]

#})

# Create vector of other-feature names

otherNames <- c(

"ASY1",

"H3K4me3",

"H3K9me2",

"H3K27me1",

"H3K27me3",

"H3K36me3",

"H3K9ac",

"H3K4me1",

"H3K27ac",

"MNase",

"genes",

"promoters",

"TSSsPlus500bp",

"TTSsMinus500bp",

"terminators",

"NLRs",

"NLRpromoters",

"NLRTSSsPlus500bp",

"NLRTTSsMinus500bp",

"NLRterminators",

"meio",

"meiopromoters",

"meioTSSsPlus500bp",

"meioTTSsMinus500bp",

"meioterminators"

)

# Create GRangesList of other features

othersGRL <- c(

"ASY1GR" = ASY1GR,

"H3K4me3GR" = H3K4me3GR,

"H3K9me2GR" = H3K9me2GR,

"H3K27me1GR" = H3K27me1GR,

"H3K27me3GR" = H3K27me3GR,

"H3K36me3GR" = H3K36me3GR,

"H3K9acGR" = H3K9acGR,

"H3K4me1GR" = H3K4me1GR,

"H3K27acGR" = H3K27acGR,

"MNaseGR" = MNaseGR,

"genesGR" = genesGR,

"promotersGR" = promotersGR,

"TSSsGR" = TSSsGR,

"TTSsGR" = TTSsGR,

"terminatorsGR" = terminatorsGR,

"NLRsGR" = NLRsGR,

"NLRpromotersGR" = NLRpromotersGR,

"NLRTSSsGR" = NLRTSSsGR,

"NLRTTSsGR" = NLRTTSsGR,

"NLRterminatorsGR" = NLRterminatorsGR,

"meioGR" = meioGR,

"meiopromotersGR" = meiopromotersGR,

"meioTSSsGR" = meioTSSsGR,

"meioTTSsGR" = meioTTSsGR,

"meioterminatorsGR" = meioterminatorsGR

)

# Perform permutation tests with randomized regions generated on a per chromosome basis;

# same per-chromosome number and size of regions in B as in A

set.seed(845934)

ptPeaksOtherPerChrom <- lapply(seq_along(othersGRL), function(x) {

permTest(A = peaksGR,

B = othersGRL[[x]],

genome = genomeGR,

mask = maskGR,

randomize.function = randomizeRegions,

allow.overlaps = TRUE,

per.chromosome = TRUE,

evaluate.function = numOverlaps,

count.once = TRUE,

ntimes = perms,

mc.set.seed = FALSE,

mc.cores = detectCores())

})

for(i in 1:length(ptPeaksOtherPerChrom)) {

assign(paste0(otherNames[i]), ptPeaksOtherPerChrom[[i]])

}

save(ptPeaksOtherPerChrom,

file = paste0("permTest_", as.character(perms), "perms_",

libNameChIP, "_peaks_vs_others_in_",

genomeName, "genome_", region,

".RData"))

# Summarise results in a table

featureName <- NULL

noOfFeatures <- NULL

expected <- NULL

observed <- NULL

pval <- NULL

zscore <- NULL

for(i in 1:length(ptPeaksOtherPerChrom)) {

featureNamei <- print(otherNames[i])

featureName <- c(featureName, featureNamei)

noOfFeaturesi <- print(length(othersGRL[[i]]))

noOfFeatures <- c(noOfFeatures, noOfFeaturesi)

expectedi <- print(round(mean(ptPeaksOtherPerChrom[[i]]$numOverlaps$permuted)))

expected <- c(expected, expectedi)

observedi <- print(ptPeaksOtherPerChrom[[i]]$numOverlaps$observed)

observed <- c(observed, observedi)

pvali <- print(round(ptPeaksOtherPerChrom[[i]]$numOverlaps$pval, 4))

pval <- c(pval, pvali)

zscorei <- print(round(ptPeaksOtherPerChrom[[i]]$numOverlaps$zscore, 4))

zscore <- c(zscore, zscorei)

}

ptPeaksOtherPerChromDataFrame <- cbind(featureName, noOfFeatures, expected, observed, pval, zscore)

colnames(ptPeaksOtherPerChromDataFrame) <- c("feature", "n", "expected", "observed", "pval", "zscore")

write.table(ptPeaksOtherPerChromDataFrame,

file = paste0("permTest_", as.character(perms), "perms_",

libNameChIP, "_peaks_vs_others_in_",

genomeName, "genome_", region,

"_DataFrame.txt"),

sep = "\t", quote = F, row.names = F)

# plot graphical summaries of results

for(i in 1:length(ptPeaksOtherPerChrom)) {

pdf(paste0(plotDir, otherNames[i],

"_permTest_", as.character(perms), "perms_",

libNameChIP, "_peaks_in_",

genomeName, "genome_", region,

"_perChrom.pdf"),

width = 10, height = 7)

plot(ptPeaksOtherPerChrom[[i]], main = paste0(libNameChIP, " peaks vs ", otherNames[i]), xlab = "Number of overlaps", ylab = "Density")

dev.off()

# Using the localZScore() function, evaluate whether the association between peaks and other is highly dependent on their exact position

lz_1kb <- localZScore(pt = ptPeaksOtherPerChrom[[i]], A = peaksGR, B = othersGRL[[i]],

window = 1000, step = 50, count.once = TRUE)

lz_10kb <- localZScore(pt = ptPeaksOtherPerChrom[[i]], A = peaksGR, B = othersGRL[[i]],

window = 10000, step = 500, count.once = TRUE)

lz_custom <- localZScore(pt = ptPeaksOtherPerChrom[[i]], A = peaksGR, B = othersGRL[[i]],

window = 10*mean(width(peaksGR)), step = mean(width(peaksGR))/2, count.once = TRUE)

win <- as.character(round((10*mean(width(peaksGR)))/1000))

step <- as.character(round(mean(width(peaksGR))/2))

pdf(paste0(plotDir, otherNames[i],

"_localZscore_permTest_", as.character(perms), "perms_",

libNameChIP, "_peaks_in_",

genomeName, "genome_", region,

"_w1kb_s50bp_w10kb_s500bp_w",

win ,"kb_s", step, "bp_perChrom.pdf"))

par(mar=c(5.1, 4.1, 4.1, 2.1))

plot(lz_1kb, main = paste0(libNameChIP, " peaks vs ", otherNames[i], " (1-kb shift)"))

mtext(side = 3, at = 2, text = paste0(libNameChIP, " peaks vs ", otherNames[i], " (1-kb shift)"))

plot(lz_10kb, main = paste0(libNameChIP, " peaks vs ", otherNames[i], " (10-kb shift)"))

mtext(side = 3, at = 2, text = paste0(libNameChIP, " peaks vs ", otherNames[i], " (10-kb shift)"))

plot(lz_custom, main = paste0(libNameChIP, " peaks vs ", otherNames[i], " (~", win, "-kb shift)"))

mtext(side = 3, at = 2, text = paste0(libNameChIP, " peaks vs ", otherNames[i], " (~", win, "-kb shift)"))

dev.off()

}

Script: DMC1_peaks_overlap_permTests_TEsuperfams.R:

#!/applications/R/R-3.3.2/bin/Rscript

# Use permutation test function in regioneR to determine if

# DMC1 ChIP-seq peaks overlap elements within each transposon superfamily

# more or less than expected by chance

# Usage:

# /applications/R/R-3.3.2/bin/Rscript DMC1_peaks_overlap_permTests_TEsuperfams.R DMC1_Rep1_ChIP 10000 'euchromatin' 'A'"

args <- commandArgs(trailingOnly = TRUE)

libNameChIP <- args[1]

perms <- as.numeric(args[2])

region <- args[3]

genomeName <- args[4]

library(regioneR)

plotDir <- "plots/"

system(paste0("[ -d ", plotDir, " ] || mkdir ", plotDir))

# Genomic definitions

chrs <- as.vector(read.table("wheat_v1.0.fa.sizes")[,1])

chrs <- chrs[-length(chrs)]

chrStart <- c(rep(1, times = length(chrs)))

chrLens <- as.vector(read.table("wheat_v1.0.fa.sizes")[,2])

chrLens <- chrLens[-length(chrLens)]

centromereStart <- as.vector(read.table(paste0("chromosome_compartments/",

"centromeres_outer_CENH3enriched_IWGSC_2018_Science_Table_S11_chr4AL

eftmostInterval_chr5ARightTwoIntervals.txt"))[,2])

centromereEnd <- as.vector(read.table(paste0("chromosome_compartments/",

"centromeres_outer_CENH3enriched_IWGSC_2018_Science_Table_S11_chr4ALeftmostInterval_chr5ARightTwoIntervals.txt"))[,3])

chrPartitions <- read.table(paste0("chromosome_compartments/",

"chromosome_partitions_IWGSC_2018_Science_Table_S29.txt"),

header = TRUE)

genomeGR <- GRanges(seqnames = chrs,

ranges = IRanges(start = chrStart,

end = chrLens),

strand = "*")

genomeGR <- genomeGR[grep(genomeName,

seqnames(genomeGR))@values]

# Define region to be analysed

if(region == "euchromatin") {

regionGR <- GRanges(seqnames = rep(chrPartitions$chrom, 2),

ranges = IRanges(start = c(rep(1, dim(chrPartitions)[1]),

chrPartitions$R2b_R3),

end = c(chrPartitions$R1_R2a,

chrLens)),

strand = "*")

regionGR <- regionGR[grep(genomeName,

seqnames(regionGR))@values]

} else if(region == "heterochromatin") {

regionGR <- GRanges(seqnames = chrPartitions$chrom,

ranges = IRanges(start = chrPartitions$R1_R2a+1,

end = chrPartitions$R2b_R3-1),

strand = "*")

regionGR <- regionGR[grep(genomeName,

seqnames(regionGR))@values]

} else if(region == "genomewide") {

regionGR <- GRanges(seqnames = chrs,

ranges = IRanges(start = rep(1, length(chrs)),

end = chrLens),

strand = "*")

regionGR <- regionGR[grep(genomeName,

seqnames(regionGR))@values]

} else {

stop("region is not euchromatin, heterochromatin or genomewide")

}

# Define region to be masked out of analysis

if(region == "euchromatin") {

maskGR <- GRanges(seqnames = chrPartitions$chrom,

ranges = IRanges(start = chrPartitions$R1_R2a+1,

end = chrPartitions$R2b_R3-1),

strand = "*")

maskGR <- maskGR[grep(genomeName,

seqnames(maskGR))@values]

} else if(region == "heterochromatin") {

maskGR <- GRanges(seqnames = rep(chrPartitions$chrom, 2),

ranges = IRanges(start = c(rep(1, dim(chrPartitions)[1]),

chrPartitions$R2b_R3),

end = c(chrPartitions$R1_R2a,

chrLens)),

strand = "*")

maskGR <- maskGR[grep(genomeName,

seqnames(maskGR))@values]

} else if(region == "genomewide") {

maskGR <- GRanges()

maskGR <- maskGR[grep(genomeName,

seqnames(maskGR))@values]

} else {

stop("region is not euchromatin, heterochromatin or genomewide")

}

# Import peaks as GRanges object

load(paste0(libNameChIP,

"_rangerPeaksGRmergedOverlaps_minuslog10_p0.001_q0.01_noMinWidth.RData"))

peaksGR <- rangerPeaksGRmergedOverlaps

rangerPeaksGRmergedOverlaps <- NULL

peaksGR <- peaksGR[grep(genomeName,

seqnames(peaksGR))@values]

# Subset to include only those not overlapping masked region (e.g., heterochromatin)

mask_peaks_overlap <- findOverlaps(query = maskGR,

subject = peaksGR,

type = "any",

select = "all",

ignore.strand = TRUE)

peaksGR <- peaksGR[-subjectHits(mask_peaks_overlap)]

strand(peaksGR) <- "*"

print("***********peaks***********")

print(peaksGR)

# TE superfamilies

otherNames <- c(

"CACTA_DTC",

"Harbinger_DTH",

"hAT_DTA",

"Helitrons_DHH",

"Mariner_DTT",

"Mutator_DTM",

"Unclassified_class_2_DXX",

"Unclassified_with_TIRs_DTX",

"Copia_LTR_RLC",

"Gypsy_LTR_RLG",

"LINE_RIX",

"SINE_SIX",

"Unclassified_LTR_RLX",

"Unclassified_repeats_XXX"

)

TEdir <- "/home/ajt200/analysis/wheat/featureProfiles/TEs/superfamilies/"

othersGRL <- lapply(seq_along(otherNames), function(x) {

TEs <- read.table(paste0(TEdir,

"iwgsc_refseqv1.0_TransposableElements_2017Mar13_superfamily_",

otherNames[x], ".bed"), header = F)

TEsGRtmp <- GRanges(seqnames = TEs$V1,

ranges = IRanges(start = TEs$V2+1,

end = TEs$V3),

strand = "*")

TEsGRtmp <- TEsGRtmp[grep(genomeName,

seqnames(TEsGRtmp))@values]

# Subset to include only those not overlapping masked region

mask_TEstmp_overlap <- findOverlaps(query = maskGR,

subject = TEsGRtmp,

type = "any",

select = "all",

ignore.strand = TRUE)

TEsGRtmp[-subjectHits(mask_TEstmp_overlap)]

})

# Perform permutation tests with randomized regions generated on a per chromosome basis;

# same per-chromosome number and size of regions in B as in A

set.seed(845934)

ptPeaksOtherPerChrom <- lapply(seq_along(othersGRL), function(x) {

permTest(A = peaksGR,

B = othersGRL[[x]],

genome = genomeGR,

mask = maskGR,

randomize.function = randomizeRegions,

allow.overlaps = TRUE,

per.chromosome = TRUE,

evaluate.function = numOverlaps,

count.once = TRUE,

ntimes = perms,

mc.set.seed = FALSE,

mc.cores = detectCores())

})

for(i in 1:length(ptPeaksOtherPerChrom)) {

assign(paste0(otherNames[i]), ptPeaksOtherPerChrom[[i]])

}

save(ptPeaksOtherPerChrom,

file = paste0("permTest_", as.character(perms), "perms_",

libNameChIP, "_peaks_vs_TEfams_in_",

genomeName, "genome_", region,

".RData"))

# Summarise results in a table

featureName <- NULL

noOfFeatures <- NULL

expected <- NULL

observed <- NULL

pval <- NULL

zscore <- NULL

for(i in 1:length(ptPeaksOtherPerChrom)) {

featureNamei <- print(otherNames[i])

featureName <- c(featureName, featureNamei)

noOfFeaturesi <- print(length(othersGRL[[i]]))

noOfFeatures <- c(noOfFeatures, noOfFeaturesi)

expectedi <- print(round(mean(ptPeaksOtherPerChrom[[i]]$numOverlaps$permuted)))

expected <- c(expected, expectedi)

observedi <- print(ptPeaksOtherPerChrom[[i]]$numOverlaps$observed)

observed <- c(observed, observedi)

pvali <- print(round(ptPeaksOtherPerChrom[[i]]$numOverlaps$pval, 4))

pval <- c(pval, pvali)

zscorei <- print(round(ptPeaksOtherPerChrom[[i]]$numOverlaps$zscore, 4))

zscore <- c(zscore, zscorei)

}

ptPeaksOtherPerChromDataFrame <- cbind(featureName, noOfFeatures, expected, observed, pval, zscore)

colnames(ptPeaksOtherPerChromDataFrame) <- c("feature", "n", "expected", "observed", "pval", "zscore")

write.table(ptPeaksOtherPerChromDataFrame,

file = paste0("permTest_", as.character(perms), "perms_",

libNameChIP, "_peaks_vs_TEfams_in_",

genomeName, "genome_", region,

"_DataFrame.txt"),

sep = "\t", quote = F, row.names = F)

# plot graphical summaries of results

for(i in 1:length(ptPeaksOtherPerChrom)) {

pdf(paste0(plotDir, otherNames[i],

"_permTest_", as.character(perms), "perms_",

libNameChIP, "_peaks_in_",

genomeName, "genome_", region,

"_perChrom.pdf"),

width = 10, height = 7)

plot(ptPeaksOtherPerChrom[[i]], main = paste0(libNameChIP, " peaks vs ", otherNames[i]), xlab = "Number of overlaps", ylab = "Density")

dev.off()

# Using the localZScore() function, evaluate whether the association between peaks and other is highly dependent on their exact position

lz_1kb <- localZScore(pt = ptPeaksOtherPerChrom[[i]], A = peaksGR, B = othersGRL[[i]],

window = 1000, step = 50, count.once = TRUE)

lz_10kb <- localZScore(pt = ptPeaksOtherPerChrom[[i]], A = peaksGR, B = othersGRL[[i]],

window = 10000, step = 500, count.once = TRUE)

lz_custom <- localZScore(pt = ptPeaksOtherPerChrom[[i]], A = peaksGR, B = othersGRL[[i]],

window = 10*mean(width(peaksGR)), step = mean(width(peaksGR))/2, count.once = TRUE)

win <- as.character(round((10*mean(width(peaksGR)))/1000))

step <- as.character(round(mean(width(peaksGR))/2))

pdf(paste0(plotDir, otherNames[i],

"_localZscore_permTest_", as.character(perms), "perms_",

libNameChIP, "_peaks_in_",

genomeName, "genome_", region,

"_w1kb_s50bp_w10kb_s500bp_w",

win ,"kb_s", step, "bp_perChrom.pdf"))

par(mar=c(5.1, 4.1, 4.1, 2.1))

plot(lz_1kb, main = paste0(libNameChIP, " peaks vs ", otherNames[i], " (1-kb shift)"))

mtext(side = 3, at = 2, text = paste0(libNameChIP, " peaks vs ", otherNames[i], " (1-kb shift)"))

plot(lz_10kb, main = paste0(libNameChIP, " peaks vs ", otherNames[i], " (10-kb shift)"))

mtext(side = 3, at = 2, text = paste0(libNameChIP, " peaks vs ", otherNames[i], " (10-kb shift)"))

plot(lz_custom, main = paste0(libNameChIP, " peaks vs ", otherNames[i], " (~", win, "-kb shift)"))

mtext(side = 3, at = 2, text = paste0(libNameChIP, " peaks vs ", otherNames[i], " (~", win, "-kb shift)"))

dev.off()

}

Scripts for identifying enriched DNA sequence motifs among ChIP-seq peaks are provided below.

Script: motifs_summits200bp/bedtools_getfasta.sh:

#!/bin/bash

# Extract nucleotide sequence at given coordinates (specified in a BED file)

# in the genome in fasta format

# Note that BED files use 0-based half-open coordinates;

# start coordinates are 0-based and end coordinates are 1-based,

# such that a feature START coordinate that cooresponds to the first base in

# a chromosome is numbered 0, while a feature END coordinate that corresponds

# to the second base in a chromosome is numbered 2 in the BED file:

# see https://genome.ucsc.edu/FAQ/FAQformat.html#format1

# Usage:

# ./bedtools_getfasta.sh wheat_v1.0.fa DMC1_Rep1_ChIP_peaks_minuslog10Qsorted_in_Agenome_euchromatin_summits200bp

genome=$1

prefix=$2

/home/ajt200/anaconda3/bin/bedtools getfasta -fi ${genome} \

-bed ${prefix}.bed \

-fo ${prefix}.fa \

-name

Script: w2frequency_maker_ranLoc_200bpseq.sh:

#!/bin/bash

# Generate background oligonucleotide frequency files for Weeder v2.0 analyses,

# based on the sequences of randomly positioned loci within the same

# subgenomic compartments as the peak sets to be analyzed

# Usage:

# ./w2frequency_maker_ranLoc_200bpseq.sh ASY1_CS_Rep1_ChIP_peaks_minuslog10Qsorted_in_Agenome_euchromatin_summits200bp

prefix=$1

toolDir="/home/ajt200/tools/Weeder2.0"

[ -d FreqFiles ] || mkdir FreqFiles

$toolDir/w2frequency_maker ${prefix}_randomLoci.fa TA ds

mv *.freq FreqFiles

Script: motifs_summits200bp/w2_summits200bpseq.sh:

#!/bin/bash

# Evaluate the top 10,000 compartmentalized DMC1 ChIP-seq peaks

# in each subgenome (ordered by decreasing -log10(ranger-assigned FDR))

# for over-representation of DNA sequence motifs using Weeder v2.0

# Usage:

# ./w2_summits200bpseq.sh DMC1_Rep1_ChIP_peaks_minuslog10Qsorted_in_Agenome_euchromatin_summits200bp

prefix=$1

toolDir="/home/ajt200/tools/Weeder2.0"

$toolDir/weeder2 -f ${prefix}.fa \

-O TA -chipseq -top 10000

Script: split_pwm.py:

#!/home/ajt200/anaconda3/bin/python3

# Parse weeder2-generated sequence of position weight matrices (PWMs)

# and split into individual PWM files

# Usage:

# python3 ./split_pwm.py ./DMC1_Rep1_ChIP_peaks_minuslog10Qsorted_in_Agenome_euchromatin_summits200bp.fa.matrix.w2

import os

from os import path

import sys

# Set/get current working directory

#os.chdir("/home/ajt200/analysis/wheat/DMC1/snakemake_ChIPseq/mapped/both/peaks/PeakRanger1.18/ranger/p0.001_q0.01/euchromatin/motifs_summits200bp/weeder2_bg_ranLoc_200bpseq/A/top10000")

print(os.getcwd())

#infile = open("./DMC1_Rep1_ChIP_peaks_minuslog10Qsorted_in_Agenome_euchromatin_summits200bp.fa.matrix.w2")

#matrix_file = "./DMC1_Rep1_ChIP_peaks_minuslog10Qsorted_in_Agenome_euchromatin_summits200bp.fa.matrix.w2"

infile = open(sys.argv[1])

matrix_file = sys.argv[1]

#path = matrix_file.split('/')[0]

path = sys.argv[1].split('/')[0]

print('\n' + "matrix file: " + matrix_file + '\n')

num_pwms = 'grep "^>" %s | wc -l' % (matrix_file)

print("Number of pwms in matrix file = ")

os.system(num_pwms)

# Assume outfile is not open

opened = False

for line_matrix in infile:

# If line begins with ">"

if line_matrix[0] == ">":

# Close the preceding outfile if it is open (see below and follow loop)

if(opened):

outfile.close()

# Set opened to True to represent an opened outfile

opened = True

# Extract pwm name: remove ">", extract pwm string (replacing tab with underscore),

# and remove any spaces or new lines

# (e.g., ">MAT1 TACATTTTTT" will become "MAT1_TACATTTTTT")

pwm_name = line_matrix[1:].rstrip().replace("\t", "_")

print("pwm: " + pwm_name)

print("Name of outfile: " + path + "/" + str(pwm_name) + ".pwm")

outfile = open(path + "/" + str(pwm_name) + ".pwm", 'w')

# Write the line to the file.

# If the line begins with ">" (at position 0; i.e., is a PWM name),

# a new outfile is created and opened, ready to be written to.

# Subsequent lines (i.e., the rows of the PWMs containing base relative frequencies)

# are each successively written to the outfile with each loop.

# Only when the for-loop reaches a new line beginning with ">" is the outfile closed,

# and a new outfile with a new name is created and opened.

outfile.write(line_matrix)

outfile.close()

print("Finished")

Script: seqLogo.R:

#!/applications/R/R-3.5.0/bin/Rscript

# Convert weeder2 position weight matrices (PWMs)

# (that have been split into separate files using split_pwm.py)

# into sequence logos using seqLogo Bioconductor package

# Usage:

# ./seqLogo.R DMC1_Rep1_ChIP_peaks_minuslog10Qsorted_in_Agenome_euchromatin_summits200bp

args <- commandArgs(trailingOnly = T)

featurePrefix <- args[1]

library(seqLogo)

seqLogoDir <- "seqLogo/"

system(paste0("[ -d ", seqLogoDir, " ] || mkdir ", seqLogoDir))

# Get number of PWMs in current working directory

num_pwm <- as.numeric(system("ls -1 MAT*.pwm | wc -l",

intern = T))

# Create individual motif logo files in EPS format

for(i in 1:num_pwm) {

pwm_name <- system(paste0("ls MAT", i, "_*.pwm"),

intern = T)

pwm_name <- sub(pattern = ".pwm",

replacement = "",

x = pwm_name)

pwm <- read.table(system(paste0("ls MAT", i, "_*.pwm"),

intern = T),

skip = 1, row.names = 1)

print(head(pwm))

postscript(paste0(seqLogoDir,

"MAT", i, ".eps"))

seqLogo(pwm, xfontsize = 60, yfontsize = 60)

dev.off()

}

pwm_list <- lapply(1:num_pwm, function(i) {

read.table(system(paste0("ls MAT", i, "_*.pwm"),

intern = T),

skip = 1, row.names = 1)

})

# Edit seqLogo command to allow logos to be combined in one PDF

# See https://support.bioconductor.org/p/35240/

mySeqLogo <- seqLogo::seqLogo

bad <- (sapply( body(mySeqLogo), "==", "grid.newpage()") |

sapply( body(mySeqLogo), "==", "par(ask = FALSE)"))

body(mySeqLogo)[bad] <- NULL

pdf(paste0(seqLogoDir, featurePrefix,

"_weeder2_motif_seqLogos.pdf"), height = 5*length(pwm_list), width = 10)

grid.newpage()

for(i in 1:length(pwm_list)) {

pushViewport(viewport(x = 0.5,

y = 1-(i/length(pwm_list))+((1/length(pwm_list))/2),

width = 1, height = 1/length(pwm_list)))

mySeqLogo(pwm_list[[i]],

xaxis = F, yaxis = T,

xfontsize = 60, yfontsize = 60)

grid.text(sprintf("Motif %d", i),

x = 0.6, y = 0.9,

gp = gpar(fontsize = 60))

popViewport()

}

dev.off()

A Snakemake workflow for creating a matrix of windowed coverage values within ChIP-seq peaks and in flanking regions is provided below.

Additionally, R scripts are provided for creating a matrix of windowed SNP (1000exomes_SNP_profiles_around_peaks_commandArgs.R) or transposable element (TE_superfamily_profiles_around_peaks_commandArgs.R) frequency values within ChIP-seq peaks and in flanking regions.

Requirements:

- Installation of Snakemake and optionally conda
- Snakefile in this repository. This contains "rules" that each execute a step in the workflow
- config.yaml in this repository. This contains customizable parameters including reference, which should be the reference genome file name without the .fa extension (e.g., wheat_v1.0)
- Optional: environment.yaml in scripts/read_alignment/snakemake_ChIPseq_MNaseseq/, used to create the software environment if conda is used
- If conda is not used, deepTools must be installed and specified in the PATH variable
- Peak coordinates and, separately, random locus coordinates in BED6 format: column 1 = chromosome ID; column 2 = 0-based start coordinates; column 3 = 1-based end coordinates; column 4 = sequential or otherwise unique numbers (this speeds up computation; see comment from dpryan79 on 13/09/2018 under GitHub issue computeMatrix has problem with multi processors #760]); column 5 = fill with NA; column 6 = fill with *
- A bigWig coverage file (generated using deepTools bamCoverage as part of the snakemake_ChIPseq_MNaseseq/ pipeline), to be used for calculating coverage profiles around peaks and random loci (e.g., DMC1_Rep1_ChIP_MappedOn_wheat_v1.0_lowXM_both_sort_norm.bw)
- A variant call format (VCF) file containing ~3 million exome sequencing-derived SNP sites (all.GP08_mm75_het3_publication01142019.vcf), from He et al. (2019) Nat. Genet. 51. DOI: 10.1038/s41588-019-0382-2
- Transposable elements (TEs) from the IWGSC RefSeq v1.0 annotation, with genomic coordinates for elements in each of 14 superfamilies in BED6 format, including strand information (one BED6-format file for each TE superfamily and for each set of randomly positioned loci)

Creating the conda environment:

conda env create --file environment.yaml --name ChIPseq_mapping

Usage:

In a Unix shell, navigate to the base directory containing Snakefile and config.yaml. Then run the following commands in the base directory (--cores should match the THREADS parameter in config.yaml):

conda activate ChIPseq_mapping

snakemake -p --cores 48

conda deactivate

Script: config.yaml:

THREADS: 48

SAMPLE: ["DMC1_Rep1_ChIP"]

FEATURES:

genomeRegionName: ["Agenome_euchromatin",

"Bgenome_euchromatin",

"Dgenome_euchromatin",

"Agenome_heterochromatin",

"Bgenome_heterochromatin",

"Dgenome_heterochromatin"]

MAPPING:

mode: "both"

reference: "data/index/wheat_v1.0"

COVERAGE:

bodyLength: 400

startLabel: "Start"

endLabel: "End"

upstream: 2000

downstream: 2000

flankName: "2kb"

binSize: 20

binName: "20bp"

sortRegions: "keep"

Script: Snakefile:

# Snakemake workflow for creating a matrix of windowed

# coverage values for genomic features and flanking regions

# Usage ("--cores" should match the "THREADS" parameter in config.yaml, and reflect available threads):

# conda activate ChIPseq_mapping

# snakemake -p --cores 48

# conda deactivate

import os

# Specify config file parameters

configfile: "config.yaml"

sample = config["SAMPLE"]

genomeRegionName = config["FEATURES"]["genomeRegionName"]

reference = config["MAPPING"]["reference"]

refbase = os.path.basename(reference)

mode = config["MAPPING"]["mode"]

flankName = config["COVERAGE"]["flankName"]

binName = config["COVERAGE"]["binName"]

# Specify the desired end target file(s)

rule all:

input:

expand("matrices/{sample}_MappedOn_{refbase}_lowXM_{mode}_sort_norm_DMC1_peaks_in_{genomeRegionName}_matrix_bin{binName}_flank{flankName}.tab",

sample = sample,

refbase = refbase,

mode = mode,

genomeRegionName = genomeRegionName,

binName = binName,

flankName = flankName),

expand("matrices/{sample}_MappedOn_{refbase}_lowXM_{mode}_sort_norm_DMC1_peaks_in_{genomeRegionName}_ranLoc_matrix_bin{binName}_flank{flankName}.tab",

sample = sample,

refbase = refbase,

mode = mode,

genomeRegionName = genomeRegionName,

binName = binName,

flankName = flankName)

# Use computeMatrix function from deepTools to create a matrix of

# coverage values for genomic features and flanking regions, and

# for equivalent random loci and flanking regions

rule compute_matrix_genomeRegionFeatures:

"""Create matrices of coverage values for genomic features and random loci"""

input:

featuresFile = "/home/ajt200/analysis/wheat/DMC1/snakemake_ChIPseq/mapped/both/peaks/PeakRanger1.18/ranger/p0.001_q0.01/DMC1_Rep1_ChIP_rangerPeaksGRmergedOverlaps_minuslog10_p0.001_q0.01_noMinWidth_in_{genomeRegionName}.bed",

ranLocFile = "/home/ajt200/analysis/wheat/DMC1/snakemake_ChIPseq/mapped/both/peaks/PeakRanger1.18/ranger/p0.001_q0.01/DMC1_Rep1_ChIP_rangerPeaksGRmergedOverlaps_minuslog10_p0.001_q0.01_noMinWidth_in_{genomeRegionName}_randomLoci.bed",

BW = "../{mode}/bw/{sample}_MappedOn_{refbase}_lowXM_{mode}_sort_norm.bw"

output:

featuresGZ = "matrices/{sample}_MappedOn_{refbase}_lowXM_{mode}_sort_norm_DMC1_peaks_in_{genomeRegionName}_matrix_bin{binName}_flank{flankName}.gz",

featuresTAB = "matrices/{sample}_MappedOn_{refbase}_lowXM_{mode}_sort_norm_DMC1_peaks_in_{genomeRegionName}_matrix_bin{binName}_flank{flankName}.tab",

ranLocGZ = "matrices/{sample}_MappedOn_{refbase}_lowXM_{mode}_sort_norm_DMC1_peaks_in_{genomeRegionName}_ranLoc_matrix_bin{binName}_flank{flankName}.gz",

ranLocTAB = "matrices/{sample}_MappedOn_{refbase}_lowXM_{mode}_sort_norm_DMC1_peaks_in_{genomeRegionName}_ranLoc_matrix_bin{binName}_flank{flankName}.tab"

params:

bodyLength = config["COVERAGE"]["bodyLength"],

startLabel = config["COVERAGE"]["startLabel"],

endLabel = config["COVERAGE"]["endLabel"],

upstream = config["COVERAGE"]["upstream"],

downstream = config["COVERAGE"]["downstream"],

binSize = config["COVERAGE"]["binSize"],

sortRegions = config["COVERAGE"]["sortRegions"]

log:

features = "logs/computeMatrix/{sample}_MappedOn_{refbase}_lowXM_{mode}_sort_norm_DMC1_peaks_in_{genomeRegionName}_matrix_bin{binName}_flank{flankName}.log",

ranLoc = "logs/computeMatrix/{sample}_MappedOn_{refbase}_lowXM_{mode}_sort_norm_DMC1_peaks_in_{genomeRegionName}_ranLoc_matrix_bin{binName}_flank{flankName}.log"

threads:

config["THREADS"]

shell:

"(computeMatrix scale-regions"

" --regionsFileName {input.featuresFile}"

" --scoreFileName {input.BW}"

" --outFileName {output.featuresGZ}"

" --outFileNameMatrix {output.featuresTAB}"

" --regionBodyLength {params.bodyLength}"

" --startLabel {params.startLabel}"

" --endLabel {params.endLabel}"

" --upstream {params.upstream}"

" --downstream {params.downstream}"

" --binSize {params.binSize}"

" --sortRegions {params.sortRegions}"

" --numberOfProcessors {threads}) 2> {log.features}; "

"(computeMatrix scale-regions"

" --regionsFileName {input.ranLocFile}"

" --scoreFileName {input.BW}"

" --outFileName {output.ranLocGZ}"

" --outFileNameMatrix {output.ranLocTAB}"

" --regionBodyLength {params.bodyLength}"

" --startLabel {params.startLabel}"

" --endLabel {params.endLabel}"

" --upstream {params.upstream}"

" --downstream {params.downstream}"

" --binSize {params.binSize}"

" --sortRegions {params.sortRegions}"

" --numberOfProcessors {threads}) 2> {log.ranLoc}"

Script: 1000exomes_SNP_profiles_around_peaks_commandArgs.R:

#!/applications/R/R-3.4.0/bin/Rscript

# Profile SNP frequency around compartmentalised peaks and random loci

# Wheat subgenome compartments (a.k.a. partitions):

# 1. R1 and R3 (distal or "euchromatin")

# 2. R2a and R2b (interstitial)

# 3. C (proximal)

# 4. heterochromatin (interstitial and proximal)

# 5. centromeres (defined by IWGSC (2018) Science 361 using CENH3 ChIP-seq data from Guo et al. (2016) PLOS Genet. 12)

# Usage:

# /applications/R/R-3.4.0/bin/Rscript ./1000exomes_SNP_profiles_around_peaks_commandArgs.R DMC1_Rep1_ChIP euchromatin A 400 2000 2kb 20

#libName <- "DMC1_Rep1_ChIP"

#region <- "euchromatin"

#genomeName <- "A"

#bodyLength <- 400

#flankSize <- 2000

#flankName <- "2kb"

#winSize <- 20

args <- commandArgs(trailingOnly = T)

libName <- args[1]

region <- args[2]

genomeName <- args[3]

bodyLength <- as.numeric(args[4])

flankSize <- as.numeric(args[5])

flankName <- as.character(args[6])

winSize <- as.numeric(args[7])

library(EnrichedHeatmap)

matDir <- paste0("matrices/")

system(paste0("[ -d ", matDir, " ] || mkdir ", matDir))

# Genomic definitions

chrs <- as.vector(read.table("wheat_v1.0.fa.sizes")[,1])

chrs <- chrs[-length(chrs)]

chrStart <- c(rep(1, times = length(chrs)))

chrLens <- as.vector(read.table("wheat_v1.0.fa.sizes")[,2])

chrLens <- chrLens[-length(chrLens)]

centromereStart <- as.vector(read.table(paste0("chromosome_compartments/",

"centromeres_outer_CENH3enriched_IWGSC_2018_Science_Table_S11_chr4ALeftmostInterval_chr5ARightTwoIntervals.txt"))[,2])

centromereEnd <- as.vector(read.table(paste0("chromosome_compartments/",

"centromeres_outer_CENH3enriched_IWGSC_2018_Science_Table_S11_chr4ALeftmostInterval_chr5ARightTwoIntervals.txt"))[,3])

chrPartitions <- read.table(paste0("chromosome_compartments/",

"chromosome_partitions_IWGSC_2018_Science_Table_S29.txt"),

header = TRUE)

genomeGR <- GRanges(seqnames = chrs,

ranges = IRanges(start = chrStart,

end = chrLens),

strand = "*")

genomeGR <- genomeGR[grep(genomeName,

seqnames(genomeGR))@values]

# Define region to be analysed

if(region == "euchromatin") {

regionGR <- GRanges(seqnames = rep(chrPartitions$chrom, 2),

ranges = IRanges(start = c(rep(1, dim(chrPartitions)[1]),

chrPartitions$R2b_R3),

end = c(chrPartitions$R1_R2a,

chrLens)),

strand = "*")

regionGR <- regionGR[grep(genomeName,

seqnames(regionGR))@values]

} else if(region == "interstitial") {

regionGR <- GRanges(seqnames = rep(chrPartitions$chrom, 2),

ranges = IRanges(start = c(chrPartitions$R1_R2a+1,

chrPartitions$C_R2b),

end = c(chrPartitions$R2a_C,

chrPartitions$R2b_R3-1)),

strand = "*")

regionGR <- regionGR[grep(genomeName,

seqnames(regionGR))@values]

} else if(region == "proximal") {

regionGR <- GRanges(seqnames = chrPartitions$chrom,

ranges = IRanges(start = chrPartitions$R2a_C+1,

end = chrPartitions$C_R2b-1),

strand = "*")

regionGR <- regionGR[grep(genomeName,

seqnames(regionGR))@values]

} else if(region == "heterochromatin") {

regionGR <- GRanges(seqnames = chrPartitions$chrom,

ranges = IRanges(start = chrPartitions$R1_R2a+1,

end = chrPartitions$R2b_R3-1),

strand = "*")

regionGR <- regionGR[grep(genomeName,

seqnames(regionGR))@values]

} else if(region == "centromeres") {

regionGR <- GRanges(seqnames = chrs,

ranges = IRanges(start = centromereStart,

end = centromereEnd),

strand = "*")

regionGR <- regionGR[grep(genomeName,

seqnames(regionGR))@values]

} else if(region == "genomewide") {

regionGR <- GRanges(seqnames = chrs,

ranges = IRanges(start = rep(1, length(chrs)),

end = chrLens),

strand = "*")

regionGR <- regionGR[grep(genomeName,

seqnames(regionGR))@values]

} else {

stop("region is not euchromatin, interstitial, proximal, heterochromatin, centromeres, or genomewide")

}

# Define region to be masked out of analysis

if(region == "euchromatin") {

maskGR <- GRanges(seqnames = chrPartitions$chrom,

ranges = IRanges(start = chrPartitions$R1_R2a+1,

end = chrPartitions$R2b_R3-1),

strand = "*")

maskGR <- maskGR[grep(genomeName,

seqnames(maskGR))@values]

} else if(region == "interstitial") {

maskGR <- GRanges(seqnames = rep(chrPartitions$chrom, 3),

ranges = IRanges(start = c(rep(1, dim(chrPartitions)[1]),

chrPartitions$R2a_C+1,

chrPartitions$R2b_R3),

end = c(chrPartitions$R1_R2a,

chrPartitions$C_R2b-1,

chrLens)),

strand = "*")

maskGR <- maskGR[grep(genomeName,

seqnames(maskGR))@values]

} else if(region == "proximal") {

maskGR <- GRanges(seqnames = rep(chrPartitions$chrom, 2),

ranges = IRanges(start = c(rep(1, dim(chrPartitions)[1]),

chrPartitions$C_R2b),

end = c(chrPartitions$R2a_C,

chrLens)),

strand = "*")

maskGR <- maskGR[grep(genomeName,

seqnames(maskGR))@values]

} else if(region == "heterochromatin") {

maskGR <- GRanges(seqnames = rep(chrPartitions$chrom, 2),

ranges = IRanges(start = c(rep(1, dim(chrPartitions)[1]),

chrPartitions$R2b_R3),

end = c(chrPartitions$R1_R2a,

chrLens)),

strand = "*")

maskGR <- maskGR[grep(genomeName,

seqnames(maskGR))@values]

} else if(region == "centromeres") {

maskGR <- GRanges(seqnames = rep(chrPartitions$chrom, 2),

ranges = IRanges(start = c(rep(1, dim(chrPartitions)[1]),

centromereEnd+1),

end = c(centromereStart-1,

chrLens)),

strand = "*")

maskGR <- maskGR[grep(genomeName,

seqnames(maskGR))@values]

} else if(region == "genomewide") {

maskGR <- GRanges()

maskGR <- maskGR[grep(genomeName,

seqnames(maskGR))@values]

} else {

stop("region is not euchromatin, interstitial, proximal, heterochromatin, centromeres, or genomewide")

}

# Load peaks in BED format and convert into GRanges

# Note addition of 1 to 0-based BED start coordinates

peaks <- read.table(paste0("/home/ajt200/analysis/wheat/DMC1/snakemake_ChIPseq/mapped/both/peaks/PeakRanger1.18/ranger/p0.001_q0.01/",

libName,

"_rangerPeaksGRmergedOverlaps_minuslog10_p0.001_q0.01_noMinWidth_in_",

genomeName, "genome_", region, ".bed"),

header = F)

colnames(peaks) <- c("chr", "start", "end", "name", "score", "strand")

peaksGR <- GRanges(seqnames = peaks$chr,

ranges = IRanges(start = peaks$start+1,

end = peaks$end),

strand = peaks$strand,

number = peaks$name)

peaksGR <- peaksGR[seqnames(peaksGR) != "chrUn"]

# Subset to include only those not overlapping masked region

mask_peaks_overlap <- findOverlaps(query = maskGR,

subject = peaksGR,

type = "any",

select = "all",

ignore.strand = TRUE)

if(length(mask_peaks_overlap) > 0) {

peaksGR <- peaksGR[-subjectHits(mask_peaks_overlap)]

}

# Load ranLoc in BED format and convert into GRanges

# Note addition of 1 to 0-based BED start coordinates

ranLoc <- read.table(paste0("/home/ajt200/analysis/wheat/DMC1/snakemake_ChIPseq/mapped/both/peaks/PeakRanger1.18/ranger/p0.001_q0.01/",

libName,

"_rangerPeaksGRmergedOverlaps_minuslog10_p0.001_q0.01_noMinWidth_in_",

genomeName, "genome_", region, "_randomLoci.bed"),

header = F)

colnames(ranLoc) <- c("chr", "start", "end", "name", "score", "strand")

ranLocGR <- GRanges(seqnames = ranLoc$chr,

ranges = IRanges(start = ranLoc$start+1,

end = ranLoc$end),

strand = ranLoc$strand,

number = ranLoc$name)

ranLocGR <- ranLocGR[seqnames(ranLocGR) != "chrUn"]

# Subset to include only those not overlapping masked region

mask_ranLoc_overlap <- findOverlaps(query = maskGR,

subject = ranLocGR,

type = "any",

select = "all",

ignore.strand = TRUE)

if(length(mask_ranLoc_overlap) > 0) {

ranLocGR <- ranLocGR[-subjectHits(mask_ranLoc_overlap)]

}

# Load exome sequencing-derived SNPs from He et al. (2019) Nat. Genet. 51. DOI: 10.1038/s41588-019-0382-2

# ~3 million SNP sites, available at: http://wheatgenomics.plantpath.ksu.edu/1000EC/

SNPs <- read.table("all.GP08_mm75_het3_publication01142019.vcf",

header = F, skip = 31,

colClasses = c(rep(NA, 2),

"NULL",

rep(NA, 2),

rep("NULL", 2),

NA,

rep("NULL", 812)))

colnames(SNPs) <- c("chr", "pos", "ref", "alt", "info")

## all exome SNPs

SNPsGR <- GRanges(seqnames = SNPs$chr,

ranges = IRanges(start = SNPs$pos,

end = SNPs$pos),

strand = "*",

coverage = rep(1, dim(SNPs)[1]))

# Define matrix and column mean frequency outfile (mean profiles)

outDF <- list(paste0(matDir,

"exome_all_SNPs_around_DMC1_peaks_in_", genomeName, "genome_", region,

"_matrix_bin", winSize, "bp_flank", flankName, ".tab"),

paste0(matDir,

"exome_all_SNPs_around_DMC1_peaks_in_", genomeName, "genome_", region,

"_ranLoc_matrix_bin", winSize, "bp_flank", flankName, ".tab"))

outDFcolMeans <- list(paste0(matDir,

"exome_all_SNPs_around_DMC1_peaks_in_", genomeName, "genome_", region,

"_matrix_bin", winSize, "bp_flank", flankName, "_colMeans.tab"),

paste0(matDir,

"exome_all_SNPs_around_DMC1_peaks_in_", genomeName, "genome_", region,

"_ranLoc_matrix_bin", winSize, "bp_flank", flankName, "_colMeans.tab"))

# Function to create SNP frequency matrices for

# feature loci and random loci (incl. flanking regions)

# and to calculate mean profiles across all feature loci and random loci

covMatrix <- function(signal,

feature,

ranLoc,

featureSize,

flankSize,

winSize,

outDF,

outDFcolMeans) {

# feature loci

set.seed(2840)

feature_smoothed <- normalizeToMatrix(signal = signal,

target = feature,

value_column = "coverage",

extend = flankSize,

mean_mode = "w0",

w = winSize,

background = 0,

smooth = TRUE,

include_target = TRUE,

target_ratio = featureSize/(featureSize+(flankSize*2)))

print("feature_smoothed")

print(feature_smoothed)

print("feature_smoothed rows = ")

print(length(feature_smoothed)/round((featureSize/winSize)+((flankSize*2)/winSize)))

feature_smoothed_DF <- data.frame(feature_smoothed)

feature_smoothed_DF_colMeans <- as.vector(colMeans(feature_smoothed_DF,

na.rm = T))

write.table(feature_smoothed_DF,

file = outDF[[1]],

quote = F, sep = "\t", row.names = F, col.names = T)

write.table(feature_smoothed_DF_colMeans,

file = outDFcolMeans[[1]],

quote = F, sep = "\t", row.names = F, col.names = T)

# random loci

set.seed(8472)

ranLoc_smoothed <- normalizeToMatrix(signal = signal,

target = ranLoc,

value_column = "coverage",

extend = flankSize,

mean_mode = "w0",

w = winSize,

background = 0,

smooth = TRUE,

include_target = TRUE,

target_ratio = featureSize/(featureSize+(flankSize*2)))

print("ranLoc_smoothed")

print(ranLoc_smoothed)

print("ranLoc_smoothed rows = ")

print(length(ranLoc_smoothed)/round((featureSize/winSize)+((flankSize*2)/winSize)))

ranLoc_smoothed_DF <- data.frame(ranLoc_smoothed)

ranLoc_smoothed_DF_colMeans <- as.vector(colMeans(ranLoc_smoothed_DF,

na.rm = T))

write.table(ranLoc_smoothed_DF,

file = outDF[[2]],

quote = F, sep = "\t", row.names = F, col.names = T)

write.table(ranLoc_smoothed_DF_colMeans,

file = outDFcolMeans[[2]],

quote = F, sep = "\t", row.names = F, col.names = T)

}

# Run covMatrix() function on each coverage GRanges object to obtain matrices

# containing frequency values around target and random loci

covMatrix(signal = SNPsGR,

feature = peaksGR,

ranLoc = ranLocGR,

featureSize = bodyLength,

flankSize = flankSize,

winSize = winSize,

outDF = outDF,

outDFcolMeans = outDFcolMeans)

print(paste0(genomeName, "-genome ", region, " ", libName, " peaks exome all SNP frequency profile calculation complete"))

## transition

SNPs_transition <- SNPs[(SNPs$ref == "A" | SNPs$ref == "G") & (SNPs$alt == "G" | SNPs$alt == "A") |

(SNPs$ref == "C" | SNPs$ref == "T") & (SNPs$alt == "T" | SNPs$alt == "C"),]

SNPsGR <- GRanges(seqnames = SNPs_transition$chr,

ranges = IRanges(start = SNPs_transition$pos,

end = SNPs_transition$pos),

strand = "*",

coverage = rep(1, dim(SNPs_transition)[1]))

# Define matrix and column mean frequency outfile (mean profiles)

outDF <- list(paste0(matDir,

"exome_transition_SNPs_around_DMC1_peaks_in_", genomeName, "genome_", region,

"_matrix_bin", winSize, "bp_flank", flankName, ".tab"),

paste0(matDir,

"exome_transition_SNPs_around_DMC1_peaks_in_", genomeName, "genome_", region,

"_ranLoc_matrix_bin", winSize, "bp_flank", flankName, ".tab"))

outDFcolMeans <- list(paste0(matDir,

"exome_transition_SNPs_around_DMC1_peaks_in_", genomeName, "genome_", region,

"_matrix_bin", winSize, "bp_flank", flankName, "_colMeans.tab"),

paste0(matDir,

"exome_transition_SNPs_around_DMC1_peaks_in_", genomeName, "genome_", region,

"_ranLoc_matrix_bin", winSize, "bp_flank", flankName, "_colMeans.tab"))

# Run covMatrix() function on each coverage GRanges object to obtain matrices

# containing frequency values around target and random loci

covMatrix(signal = SNPsGR,

feature = peaksGR,

ranLoc = ranLocGR,

featureSize = bodyLength,

flankSize = flankSize,

winSize = winSize,

outDF = outDF,

outDFcolMeans = outDFcolMeans)

print(paste0(genomeName, "-genome ", region, " ", libName, " peaks exome transition SNP frequency profile calculation complete"))

## transversion

SNPs_transversion <- SNPs[(SNPs$ref == "A" | SNPs$ref == "G") & (SNPs$alt == "C" | SNPs$alt == "T") |

(SNPs$ref == "C" | SNPs$ref == "T") & (SNPs$alt == "A" | SNPs$alt == "G"),]

stopifnot((dim(SNPs_transition)[1] +

dim(SNPs_transversion)[1]) ==

dim(SNPs)[1])

SNPsGR <- GRanges(seqnames = SNPs_transversion$chr,

ranges = IRanges(start = SNPs_transversion$pos,

end = SNPs_transversion$pos),

strand = "*",

coverage = rep(1, dim(SNPs_transversion)[1]))

# Define matrix and column mean frequency outfile (mean profiles)

outDF <- list(paste0(matDir,

"exome_transversion_SNPs_around_DMC1_peaks_in_", genomeName, "genome_", region,

"_matrix_bin", winSize, "bp_flank", flankName, ".tab"),

paste0(matDir,

"exome_transversion_SNPs_around_DMC1_peaks_in_", genomeName, "genome_", region,

"_ranLoc_matrix_bin", winSize, "bp_flank", flankName, ".tab"))

outDFcolMeans <- list(paste0(matDir,

"exome_transversion_SNPs_around_DMC1_peaks_in_", genomeName, "genome_", region,

"_matrix_bin", winSize, "bp_flank", flankName, "_colMeans.tab"),

paste0(matDir,

"exome_transversion_SNPs_around_DMC1_peaks_in_", genomeName, "genome_", region,

"_ranLoc_matrix_bin", winSize, "bp_flank", flankName, "_colMeans.tab"))

# Run covMatrix() function on each coverage GRanges object to obtain matrices

# containing frequency values around target and random loci

covMatrix(signal = SNPsGR,

feature = peaksGR,

ranLoc = ranLocGR,

featureSize = bodyLength,

flankSize = flankSize,

winSize = winSize,

outDF = outDF,

outDFcolMeans = outDFcolMeans)

print(paste0(genomeName, "-genome ", region, " ", libName, " peaks exome transversion SNP frequency profile calculation complete"))

Script: TE_superfamily_profiles_around_peaks_commandArgs.R:

#!/applications/R/R-3.4.0/bin/Rscript

# Profile TE frequency around compartmentalised peaks and random loci

# Wheat subgenome compartments (a.k.a. partitions):

# 1. R1 and R3 (distal or "euchromatin")

# 2. R2a and R2b (interstitial)

# 3. C (proximal)

# 4. heterochromatin (interstitial and proximal)

# 5. centromeres (defined by IWGSC (2018) Science 361 using CENH3 ChIP-seq data from Guo et al. (2016) PLOS Genet. 12)

# Usage:

# /applications/R/R-3.4.0/bin/Rscript ./TE_superfamily_profiles_around_peaks_commandArgs.R DMC1_Rep1_ChIP euchromatin A 400 2000 2kb 20

#libName <- "DMC1_Rep1_ChIP"

#region <- "euchromatin"

#genomeName <- "A"

#bodyLength <- 400

#flankSize <- 2000

#flankName <- "2kb"

#winSize <- 20

args <- commandArgs(trailingOnly = T)

libName <- args[1]

region <- args[2]

genomeName <- args[3]

bodyLength <- as.numeric(args[4])

flankSize <- as.numeric(args[5])

flankName <- as.character(args[6])

winSize <- as.numeric(args[7])

library(EnrichedHeatmap)

library(parallel)

matDir <- paste0("matrices/")

system(paste0("[ -d ", matDir, " ] || mkdir ", matDir))

# Genomic definitions

chrs <- as.vector(read.table("wheat_v1.0.fa.sizes")[,1])

chrs <- chrs[-length(chrs)]

chrStart <- c(rep(1, times = length(chrs)))

chrLens <- as.vector(read.table("wheat_v1.0.fa.sizes")[,2])

chrLens <- chrLens[-length(chrLens)]

centromereStart <- as.vector(read.table(paste0("chromosome_compartments/",

"centromeres_outer_CENH3enriched_IWGSC_2018_Science_Table_S11_chr4ALeftmostInterval_chr5ARightTwoIntervals.txt"))[,2])

centromereEnd <- as.vector(read.table(paste0("chromosome_compartments/",

"centromeres_outer_CENH3enriched_IWGSC_2018_Science_Table_S11_chr4ALeftmostInterval_chr5ARightTwoIntervals.txt"))[,3])

chrPartitions <- read.table(paste0("chromosome_compartments/",

"chromosome_partitions_IWGSC_2018_Science_Table_S29.txt"),

header = TRUE)

genomeGR <- GRanges(seqnames = chrs,

ranges = IRanges(start = chrStart,

end = chrLens),

strand = "*")

genomeGR <- genomeGR[grep(genomeName,

seqnames(genomeGR))@values]

# Define region to be analysed

if(region == "euchromatin") {

regionGR <- GRanges(seqnames = rep(chrPartitions$chrom, 2),

ranges = IRanges(start = c(rep(1, dim(chrPartitions)[1]),

chrPartitions$R2b_R3),

end = c(chrPartitions$R1_R2a,

chrLens)),

strand = "*")

regionGR <- regionGR[grep(genomeName,

seqnames(regionGR))@values]

} else if(region == "interstitial") {

regionGR <- GRanges(seqnames = rep(chrPartitions$chrom, 2),

ranges = IRanges(start = c(chrPartitions$R1_R2a+1,

chrPartitions$C_R2b),

end = c(chrPartitions$R2a_C,

chrPartitions$R2b_R3-1)),

strand = "*")

regionGR <- regionGR[grep(genomeName,

seqnames(regionGR))@values]

} else if(region == "proximal") {

regionGR <- GRanges(seqnames = chrPartitions$chrom,

ranges = IRanges(start = chrPartitions$R2a_C+1,

end = chrPartitions$C_R2b-1),

strand = "*")

regionGR <- regionGR[grep(genomeName,

seqnames(regionGR))@values]

} else if(region == "heterochromatin") {

regionGR <- GRanges(seqnames = chrPartitions$chrom,

ranges = IRanges(start = chrPartitions$R1_R2a+1,

end = chrPartitions$R2b_R3-1),

strand = "*")

regionGR <- regionGR[grep(genomeName,

seqnames(regionGR))@values]

} else if(region == "centromeres") {

regionGR <- GRanges(seqnames = chrs,

ranges = IRanges(start = centromereStart,

end = centromereEnd),

strand = "*")

regionGR <- regionGR[grep(genomeName,

seqnames(regionGR))@values]

} else if(region == "genomewide") {

regionGR <- GRanges(seqnames = chrs,

ranges = IRanges(start = rep(1, length(chrs)),

end = chrLens),

strand = "*")

regionGR <- regionGR[grep(genomeName,

seqnames(regionGR))@values]

} else {

stop("region is not euchromatin, interstitial, proximal, heterochromatin, centromeres, or genomewide")

}

# Define region to be masked out of analysis

if(region == "euchromatin") {

maskGR <- GRanges(seqnames = chrPartitions$chrom,

ranges = IRanges(start = chrPartitions$R1_R2a+1,

end = chrPartitions$R2b_R3-1),

strand = "*")

maskGR <- maskGR[grep(genomeName,

seqnames(maskGR))@values]

} else if(region == "interstitial") {

maskGR <- GRanges(seqnames = rep(chrPartitions$chrom, 3),

ranges = IRanges(start = c(rep(1, dim(chrPartitions)[1]),

chrPartitions$R2a_C+1,

chrPartitions$R2b_R3),

end = c(chrPartitions$R1_R2a,

chrPartitions$C_R2b-1,

chrLens)),

strand = "*")

maskGR <- maskGR[grep(genomeName,

seqnames(maskGR))@values]

} else if(region == "proximal") {

maskGR <- GRanges(seqnames = rep(chrPartitions$chrom, 2),

ranges = IRanges(start = c(rep(1, dim(chrPartitions)[1]),

chrPartitions$C_R2b),

end = c(chrPartitions$R2a_C,

chrLens)),

strand = "*")

maskGR <- maskGR[grep(genomeName,

seqnames(maskGR))@values]

} else if(region == "heterochromatin") {

maskGR <- GRanges(seqnames = rep(chrPartitions$chrom, 2),

ranges = IRanges(start = c(rep(1, dim(chrPartitions)[1]),

chrPartitions$R2b_R3),

end = c(chrPartitions$R1_R2a,

chrLens)),

strand = "*")

maskGR <- maskGR[grep(genomeName,

seqnames(maskGR))@values]

} else if(region == "centromeres") {

maskGR <- GRanges(seqnames = rep(chrPartitions$chrom, 2),

ranges = IRanges(start = c(rep(1, dim(chrPartitions)[1]),

centromereEnd+1),

end = c(centromereStart-1,

chrLens)),

strand = "*")

maskGR <- maskGR[grep(genomeName,

seqnames(maskGR))@values]

} else if(region == "genomewide") {

maskGR <- GRanges()

maskGR <- maskGR[grep(genomeName,

seqnames(maskGR))@values]

} else {

stop("region is not euchromatin, interstitial, proximal, heterochromatin, centromeres, or genomewide")

}

# Load peaks in BED format and convert into GRanges

# Note addition of 1 to 0-based BED start coordinates

peaks <- read.table(paste0("/home/ajt200/analysis/wheat/DMC1/snakemake_ChIPseq/mapped/both/peaks/PeakRanger1.18/ranger/p0.001_q0.01/",

libName,

"_rangerPeaksGRmergedOverlaps_minuslog10_p0.001_q0.01_noMinWidth_in_",

genomeName, "genome_", region, ".bed"),

header = F)

colnames(peaks) <- c("chr", "start", "end", "name", "score", "strand")

peaksGR <- GRanges(seqnames = peaks$chr,

ranges = IRanges(start = peaks$start+1,

end = peaks$end),

strand = peaks$strand,

number = peaks$name)

peaksGR <- peaksGR[seqnames(peaksGR) != "chrUn"]

# Subset to include only those not overlapping masked region

mask_peaks_overlap <- findOverlaps(query = maskGR,

subject = peaksGR,

type = "any",

select = "all",

ignore.strand = TRUE)

if(length(mask_peaks_overlap) > 0) {

peaksGR <- peaksGR[-subjectHits(mask_peaks_overlap)]

}

# Load ranLoc in BED format and convert into GRanges

# Note addition of 1 to 0-based BED start coordinates

ranLoc <- read.table(paste0("/home/ajt200/analysis/wheat/DMC1/snakemake_ChIPseq/mapped/both/peaks/PeakRanger1.18/ranger/p0.001_q0.01/",

libName,

"_rangerPeaksGRmergedOverlaps_minuslog10_p0.001_q0.01_noMinWidth_in_",

genomeName, "genome_", region, "_randomLoci.bed"),

header = F)

colnames(ranLoc) <- c("chr", "start", "end", "name", "score", "strand")

ranLocGR <- GRanges(seqnames = ranLoc$chr,

ranges = IRanges(start = ranLoc$start+1,

end = ranLoc$end),

strand = ranLoc$strand,

number = ranLoc$name)

ranLocGR <- ranLocGR[seqnames(ranLocGR) != "chrUn"]

# Subset to include only those not overlapping masked region

mask_ranLoc_overlap <- findOverlaps(query = maskGR,

subject = ranLocGR,

type = "any",

select = "all",

ignore.strand = TRUE)

if(length(mask_ranLoc_overlap) > 0) {

ranLocGR <- ranLocGR[-subjectHits(mask_ranLoc_overlap)]

}

# Load TE superfamily BED files

superfamCode <- c("RLG",

"RLC",

"RLX",

"RIX",

"SIX",

"DTC",

"DTM",

"DTX",

"DTH",

"DTT",

"DXX",

"DTA",

"DHH",

"XXX")

superfamName <- c("Gypsy_LTR",

"Copia_LTR",

"Unclassified_LTR",

"LINE",

"SINE",

"CACTA",

"Mutator",

"Unclassified_with_TIRs",

"Harbinger",

"Mariner",

"Unclassified_class_2",

"hAT",

"Helitrons",

"Unclassified_repeats")

superfamListGR <- mclapply(seq_along(superfamName), function(x) {

superfam <- read.table(paste0("iwgsc_refseqv1.0_TransposableElements_2017Mar13_superfamily_",

superfamName[x], "_", superfamCode[x], ".bed"),

header = F)

colnames(superfam) <- c("chr", "start", "end", "name", "score", "strand")

superfamGR <- GRanges(seqnames = superfam$chr,

ranges = IRanges(start = superfam$start+1,

end = superfam$end),

strand = "*",

number = superfam$name,

coverage = rep(1, dim(superfam)[1]))

superfamGR <- superfamGR[seqnames(superfamGR) != "chrUn"]

# Subset to include only those not overlapping masked region

mask_superfam_overlap <- findOverlaps(query = maskGR,

subject = superfamGR,

type = "any",

select = "all",

ignore.strand = TRUE)

if(length(mask_superfam_overlap) > 0) {

superfamGR <- superfamGR[-subjectHits(mask_superfam_overlap)]

}

superfamGR

}, mc.cores = length(superfamName))

# Define matrix and column mean outfiles

outDF <- lapply(seq_along(superfamName), function(x) {

list(paste0(matDir, superfamName[x], "_", superfamCode[x],

"_around_DMC1_peaks_in_", genomeName, "genome_", region,

"_matrix_bin", winSize, "bp_flank", flankName, ".tab"),

paste0(matDir, superfamName[x], "_", superfamCode[x],

"_around_DMC1_peaks_in_", genomeName, "genome_", region,

"_ranLoc_matrix_bin", winSize, "bp_flank", flankName, ".tab"))

})

outDFcolMeans <- lapply(seq_along(superfamName), function(x) {

list(paste0(matDir, superfamName[x], "_", superfamCode[x],

"_around_DMC1_peaks_in_", genomeName, "genome_", region,

"_matrix_bin", winSize, "bp_flank", flankName, "_colMeans.tab"),

paste0(matDir, superfamName[x], "_", superfamCode[x],

"_around_DMC1_peaks_in_", genomeName, "genome_", region,

"_ranLoc_matrix_bin", winSize, "bp_flank", flankName, "_colMeans.tab"))

})

# Function to create TE frequency matrices for

# feature loci and random loci (incl. flanking regions)

# and to calculate mean profiles across all feature loci and random loci

covMatrix <- function(signal,

feature,

ranLoc,

featureSize,

flankSize,

winSize,

outDF,

outDFcolMeans) {

# feature loci

set.seed(2840)

feature_smoothed <- normalizeToMatrix(signal = signal,

target = feature,

value_column = "coverage",

extend = flankSize,

mean_mode = "w0",

w = winSize,

background = 0,

smooth = TRUE,

include_target = TRUE,

target_ratio = featureSize/(featureSize+(flankSize*2)))

print("feature_smoothed")

print(feature_smoothed)

print("feature_smoothed rows = ")

print(length(feature_smoothed)/round((featureSize/winSize)+((flankSize*2)/winSize)))

feature_smoothed_DF <- data.frame(feature_smoothed)

feature_smoothed_DF_colMeans <- as.vector(colMeans(feature_smoothed_DF,

na.rm = T))

write.table(feature_smoothed_DF,

file = outDF[[1]],

quote = F, sep = "\t", row.names = F, col.names = T)

write.table(feature_smoothed_DF_colMeans,

file = outDFcolMeans[[1]],

quote = F, sep = "\t", row.names = F, col.names = T)

# random loci

set.seed(8472)

ranLoc_smoothed <- normalizeToMatrix(signal = signal,

target = ranLoc,

value_column = "coverage",

extend = flankSize,

mean_mode = "w0",

w = winSize,

background = 0,

smooth = TRUE,

include_target = TRUE,

target_ratio = featureSize/(featureSize+(flankSize*2)))

print("ranLoc_smoothed")

print(ranLoc_smoothed)

print("ranLoc_smoothed rows = ")

print(length(ranLoc_smoothed)/round((featureSize/winSize)+((flankSize*2)/winSize)))

ranLoc_smoothed_DF <- data.frame(ranLoc_smoothed)

ranLoc_smoothed_DF_colMeans <- as.vector(colMeans(ranLoc_smoothed_DF,

na.rm = T))

write.table(ranLoc_smoothed_DF,

file = outDF[[2]],

quote = F, sep = "\t", row.names = F, col.names = T)

write.table(ranLoc_smoothed_DF_colMeans,

file = outDFcolMeans[[2]],

quote = F, sep = "\t", row.names = F, col.names = T)

}

# Run covMatrix() function on each feature GRanges object to obtain matrices

# containing normalised feature frequency values around target and random loci

mclapply(seq_along(superfamName), function(x) {

covMatrix(signal = superfamListGR[[x]],

feature = peaksGR,

ranLoc = ranLocGR,

featureSize = bodyLength,

flankSize = flankSize,

winSize = winSize,

outDF = outDF[[x]],

outDFcolMeans = outDFcolMeans[[x]])

print(paste0(superfamName[x], "_", superfamCode[x],

"_around_DMC1_peaks_in_", genomeName, "genome_", region,

" profile calculation complete"))

}, mc.cores = length(superfamName))

The R script group_peaks_into_cMMb_quantiles.R was used to divide ChIP-seq peaks into four groups corresponding to those in the 100th–75th (Quantile 1), 75th–50th (Quantile 2), 50th–25th (Quantile 3) and 25th–0th (Quantile 4) percentiles with regard to their mean crossover recombination rate (cM/Mb) values, derived from a Chinese Spring × Renan genetic map. This script extends ChIP-seq peak boundaries by 1 kb on each side, and computes mean cM/Mb values within these intervals using previously calculated mean recombination rates in 10-Mb sliding windows with a 1-Mb step (iwgsc_refseqv1.0_recombination_rate.txt, available as part of the IWGSC RefSeq v1.0 annotation). group_peaks_into_cMMb_quantiles.R requires peak coordinates and, separately, random locus coordinates in BED6 format: column 1 = chromosome ID; column 2 = 0-based start coordinate; column 3 = 1-based end coordinates; column 4 = sequential or otherwise unique numbers (this will speed up computation; see comment from dpryan79 on 13/09/2018 under GitHub issue computeMatrix has problem with multi processors #760]); column 5 = fill with NA; column 6 = fill with *.

Script: group_peaks_into_cMMb_quantiles.R:

#!/applications/R/R-3.5.0/bin/Rscript

# Divide ChIP-seq peaks into four groups corresponding to those within the

# 100th--75th (Quantile 1), 75th--50th (Quantile 2),

# 50th--25th (Quantile 3) and 25th--0th (Quantile 4) percentiles

# with regard to their mean crossover recombination rate (cM/Mb) values,

# derived from a Chinese Spring × Renan genetic map.

#

# This script extends ChIP-seq peak boundaries by 1 kb on each side,

# and computes mean cM/Mb values within these intervals using previously

# calculated mean recombination rates in 10-Mb sliding windows with a 1-Mb step

# (iwgsc_refseqv1.0_recombination_rate.txt), available as part of the IWGSC RefSeq v1.0 annotation:

# https://urgi.versailles.inra.fr/download/iwgsc/IWGSC_RefSeq_Annotations/v1.0/

#

# It requires peak coordinates and, separately, random locus coordinates in BED6 format:

# column 1 = chromosome ID; column 2 = 0-based start coordinate; column 3 = 1-based end coordinates;

# column 4 = sequential or otherwise unique numbers (this will speed up computation; see comment from dpryan79 on 13/09/2018 under GitHub issue [computeMatrix has problem with multi processors #760](https://github.com/deeptools/deepTools/issues/760)]);

# column 5 = fill with NA; column 6 = fill with \*.

# Extract and save feature IDs for each quantile for further analyses

# (e.g., mean and 95% CI metaprofile calculation and plotting).

# Usage:

# /applications/R/R-3.5.0/bin/Rscript group_peaks_into_cMMb_quantiles.R DMC1_Rep1_ChIP DMC1 'Agenome_euchromatin,Bgenome_euchromatin,Dgenome_euchromatin' 4

#libName <- "DMC1_Rep1_ChIP"

#dirName <- "DMC1"

#featureName <- unlist(strsplit("Agenome_euchromatin,Bgenome_euchromatin,Dgenome_euchromatin",

# split = ","))

#quantiles <- 4

args <- commandArgs(trailingOnly = T)

libName <- args[1]

dirName <- args[2]

featureName <- unlist(strsplit(args[3],

split = ","))

quantiles <- as.numeric(args[4])

library(GenomicRanges)

library(dplyr)

library(parallel)

# Load features in BED format and convert into GRanges

# Note addition of 1 to 0-based BED start coordinates

features <- lapply(seq_along(featureName), function(y) {

tmp <- read.table(paste0("/home/ajt200/analysis/wheat/", dirName,

"/snakemake_ChIPseq/mapped/both/peaks/PeakRanger1.18/ranger/p0.001_q0.01/",

libName,

"_rangerPeaksGRmergedOverlaps_minuslog10_p0.001_q0.01_noMinWidth_in_",

featureName[y], ".bed"),

header = F)

data.frame(tmp,

V7 = paste0(featureName[y], "_", tmp$V4),

stringsAsFactors = F)

})

# If features from multiple subgenomes and/or compartments are to be analysed,

# concatenate the corresponding feature data.frames

if(length(featureName) > 1) {

features <- do.call(rbind, features)

} else {

features <- features[[1]]

}

colnames(features) <- c("chr", "start", "end", "name", "score", "strand", "featureID")

featuresGR <- GRanges(seqnames = features$chr,

ranges = IRanges(start = features$start+1,

end = features$end),

strand = features$strand,

featureID = features$featureID)

# Extend feature boundaries to include 1000 bp upstream

# and downstream for calculation of mean cM/Mb around loci

featuresGR_ext <- GRanges(seqnames = seqnames(featuresGR),

ranges = IRanges(start = start(featuresGR)-1000,

end = end(featuresGR)+1000),

strand = strand(featuresGR),

featureID = featuresGR$featureID)

print(featuresGR_ext)

# Load ranLocs in BED format and convert into GRanges

# Note addition of 1 to 0-based BED start coordinates

ranLocs <- lapply(seq_along(featureName), function(y) {

tmp <- read.table(paste0("/home/ajt200/analysis/wheat/", dirName,

"/snakemake_ChIPseq/mapped/both/peaks/PeakRanger1.18/ranger/p0.001_q0.01/",

libName,

"_rangerPeaksGRmergedOverlaps_minuslog10_p0.001_q0.01_noMinWidth_in_",

featureName[y], "_randomLoci.bed"),

header = F)

data.frame(tmp,

V7 = paste0(featureName[y], "_", tmp$V4),

stringsAsFactors = F)

})

# If ranLocs from multiple subgenomes and/or compartments are to be analysed,

# concatenate the corresponding ranLoc data.frames

if(length(featureName) > 1) {

ranLocs <- do.call(rbind, ranLocs)

} else {

ranLocs <- ranLocs[[1]]

}

colnames(ranLocs) <- c("chr", "start", "end", "name", "score", "strand", "ranLocID")

ranLocsGR <- GRanges(seqnames = ranLocs$chr,

ranges = IRanges(start = ranLocs$start+1,

end = ranLocs$end),

strand = ranLocs$strand,

ranLocID = ranLocs$ranLocID)

# Extend ranLoc boundaries to include 1000 bp upstream

# and downstream for calculation of mean cM/Mb around loci

ranLocsGR_ext <- GRanges(seqnames = seqnames(ranLocsGR),

ranges = IRanges(start = start(ranLocsGR)-1000,

end = end(ranLocsGR)+1000),

strand = strand(ranLocsGR),

ranLocID = ranLocsGR$ranLocID)

print(ranLocsGR_ext)

# Convert windowed recombination rate into GRanges

cMMb <- read.table("iwgsc_refseqv1.0_recombination_rate.txt",

header = T)

cMMbGR <- GRanges(seqnames = cMMb$chromosome,

ranges = IRanges(start = cMMb$intervalStart,

end = cMMb$intervalEnd),

strand = "*",

cMMb = cMMb$recombinationRate)

# Obtain cMMb values for each feature extended by 1000 bp on each side

# Where features overlap more than one winName window, calculate mean cMMb

feature_cMMb_overlaps <- findOverlaps(query = featuresGR_ext,

subject = cMMbGR,

type = "any",

select = "all",

ignore.strand = TRUE)

feature_cMMb_overlapsList <- lapply(seq_along(featuresGR_ext), function(x) {

subjectHits(feature_cMMb_overlaps)[queryHits(feature_cMMb_overlaps) == x]

})

feature_cMMb <- sapply(feature_cMMb_overlapsList,

function(x) mean(cMMbGR$cMMb[x], na.rm = TRUE))

featuresGR <- GRanges(featuresGR,

featureID = featuresGR$featureID,

cMMb = feature_cMMb)

# Obtain cMMb values for each ranLoc extended by 1000 bp on each side

# Where ranLocs overlap more than one winName window, calculate mean cMMb

ranLoc_cMMb_overlaps <- findOverlaps(query = ranLocsGR_ext,

subject = cMMbGR,

type = "any",

select = "all",

ignore.strand = TRUE)

ranLoc_cMMb_overlapsList <- lapply(seq_along(ranLocsGR_ext), function(x) {

subjectHits(ranLoc_cMMb_overlaps)[queryHits(ranLoc_cMMb_overlaps) == x]

})

ranLoc_cMMb <- sapply(ranLoc_cMMb_overlapsList,

function(x) mean(cMMbGR$cMMb[x], na.rm = TRUE))

ranLocsGR <- GRanges(ranLocsGR,

ranLocID = ranLocsGR$ranLocID,

cMMb = ranLoc_cMMb)

# Define orderingFactor to be used for grouping features into quantiles

orderingFactor <- "cMMb"

outDir <- paste0("quantiles_by_", orderingFactor, "/")

plotDir_list <- lapply(seq_along(outDir), function(w) {

paste0(outDir[w], "plots/")

})

sapply(seq_along(outDir), function(w) {

system(paste0("[ -d ", outDir[w], " ] || mkdir ", outDir[w]))

})

sapply(seq_along(outDir), function(w) {

system(paste0("[ -d ", plotDir_list[[w]], " ] || mkdir ", plotDir_list[[w]]))

})

# For each population, divide features into quantiles based on decreasing orderingFactor

# all subgenomes

featuresDF <- data.frame(featuresGR,

quantile = as.character(""),

stringsAsFactors = F)

mclapply(seq_along(orderingFactor), function(w) {

print(orderingFactor[w])

# Assign 0s to NA values only for coverage data

if(grepl("_in_", orderingFactor[w])) {

featuresDF[,which(colnames(featuresDF) == orderingFactor[w])][which(is.na(featuresDF[,which(colnames(featuresDF) == orderingFactor[w])]))] <- 0

}

if(grepl("HudsonRM", orderingFactor[w])) {

quantiles <- 2

}

quantilesStats <- data.frame()

for(k in 1:quantiles) {

# First quantile should span 1 to greater than, e.g., 0.75 proportions of features

if(k < quantiles) {

featuresDF[ !is.na(featuresDF[,which(colnames(featuresDF) == orderingFactor[w])]) &

percent_rank(featuresDF[,which(colnames(featuresDF) == orderingFactor[w])]) <= 1-((k-1)/quantiles) &

percent_rank(featuresDF[,which(colnames(featuresDF) == orderingFactor[w])]) > 1-(k/quantiles), ]$quantile <- paste0("Quantile ", k)

} else {

# Final quantile should span 0 to, e.g., 0.25 proportions of features

featuresDF[ !is.na(featuresDF[,which(colnames(featuresDF) == orderingFactor[w])]) &

percent_rank(featuresDF[,which(colnames(featuresDF) == orderingFactor[w])]) <= 1-((k-1)/quantiles) &

percent_rank(featuresDF[,which(colnames(featuresDF) == orderingFactor[w])]) >= 1-(k/quantiles), ]$quantile <- paste0("Quantile ", k)

}

write.table(featuresDF[featuresDF$quantile == paste0("Quantile ", k),],

file = paste0(outDir[w],

"quantile", k, "_of_", quantiles,

"_by_", orderingFactor[w],

"_of_", libName, "_peaks_in_",

paste0(featureName,

collapse = "_"), ".txt"),

quote = FALSE, sep = "\t", row.names = FALSE)

stats <- data.frame(quantile = as.integer(k),

n = as.integer(dim(featuresDF[featuresDF$quantile == paste0("Quantile ", k),])[1]),

mean_width = as.integer(round(mean(featuresDF[featuresDF$quantile == paste0("Quantile ", k),]$width, na.rm = T))),

total_width = as.integer(sum(featuresDF[featuresDF$quantile == paste0("Quantile ", k),]$width, na.rm = T)),

mean_orderingFactor = as.numeric(mean(featuresDF[featuresDF$quantile == paste0("Quantile ", k),][,which(colnames(featuresDF) == orderingFactor[w])], na.rm = T)))

quantilesStats <- rbind(quantilesStats, stats)

}

write.table(quantilesStats,

file = paste0(outDir[w],

"summary_", quantiles, "quantiles",

"_by_", orderingFactor[w],

"_of_", libName, "_peaks_in_",

paste0(featureName,

collapse = "_"), ".txt"),

quote = FALSE, sep = "\t", row.names = FALSE)

write.table(featuresDF,

file = paste0(outDir[w],

"features_", quantiles, "quantiles",

"_by_", orderingFactor[w],

"_of_", libName, "_peaks_in_",

paste0(featureName,

collapse = "_"), ".txt"),

quote = FALSE, sep = "\t", row.names = FALSE)

# Divide ranLocs into quantiles based on feature quantile indices

ranLocsDF <- data.frame(ranLocsGR,

random = as.character(""),

stringsAsFactors = F)

# Get row indices for each feature quantile

quantileIndices <- lapply(1:quantiles, function(k) {

which(featuresDF$quantile == paste0("Quantile ", k))

})

for(k in 1:quantiles) {

ranLocsDF[quantileIndices[[k]],]$random <- paste0("Random ", k)

}

write.table(ranLocsDF,

file = paste0(outDir[w],

"features_", quantiles, "quantiles",

"_by_", orderingFactor[w],

"_of_", libName, "_peaks_in_",

paste0(featureName,

collapse = "_"), "_ranLocs.txt"),

quote = FALSE, sep = "\t", row.names = FALSE)

}, mc.cores = length(orderingFactor), mc.preschedule = F)

peak_cMMb_quantile_metaprofiles.R calculates and plots metaprofiles of ChIP-seq, MNase-seq and RNA-seq signals, DNA methylation proportions, and SNP and transposon frequencies (peak windowed means and 95% confidence intervals, CIs) for each group of peaks, defined either by decreasing recombination rate or randomly.

Script: peak_cMMb_quantile_metaprofiles.R:

#!/applications/R/R-3.5.0/bin/Rscript

# Calculate and plot metaprofiles of ChIP-seq, MNase-seq and RNA-seq signals,

# DNA methylation proportions, and SNP and transposon frequencies

# (peak windowed means and 95% confidence intervals, CIs)

# for each group of peaks, defined either by

# decreasing recombination rate (cM/Mb) or randomly

# Usage:

# /applications/R/R-3.5.0/bin/Rscript peak_cMMb_quantile_metaprofiles.R DMC1_Rep1_ChIP DMC1 'Agenome_euchromatin,Bgenome_euchromatin,Dgenome_euchromatin' cMMb 4 both 400 2000 2kb 20 '0.02,0.96'

#libName <- "DMC1_Rep1_ChIP"

#dirName <- "DMC1"

#featureName <- unlist(strsplit("Agenome_euchromatin,Bgenome_euchromatin,Dgenome_euchromatin",

# split = ","))

#orderingFactor <- "cMMb"

#quantiles <- 4

#align <- "both"

#bodyLength <- 400

#upstream <- 2000

#downstream <- 2000

#flankName <- "2 kb"

#binSize <- 20

## top left

#legendPos <- as.numeric(unlist(strsplit("0.02,0.96",

# split = ",")))

## top centre

#legendPos <- as.numeric(unlist(strsplit("0.38,0.96",

# split = ",")))

## top right

#legendPos <- as.numeric(unlist(strsplit("0.75,0.96",

# split = ",")))

## bottom left

#legendPos <- as.numeric(unlist(strsplit("0.02,0.30",

# split = ",")))

args <- commandArgs(trailingOnly = T)

libName <- args[1]

dirName <- args[2]

featureName <- unlist(strsplit(args[3],

split = ","))

orderingFactor <- args[4]

quantiles <- as.numeric(args[5])

align <- args[6]

bodyLength <- as.numeric(args[7])

upstream <- as.numeric(args[8])

downstream <- as.numeric(args[8])

flankName <- args[9]

binSize <- as.numeric(args[10])

legendPos <- as.numeric(unlist(strsplit(args[11],

split = ",")))

library(parallel)

library(tidyr)

library(dplyr)

library(ggplot2)

library(ggthemes)

library(grid)

library(gridExtra)

library(extrafont)

outDir <- paste0("quantiles_by_", orderingFactor, "/")

plotDir <- paste0(outDir, "plots/")

system(paste0("[ -d ", outDir, " ] || mkdir ", outDir))

system(paste0("[ -d ", plotDir, " ] || mkdir ", plotDir))

# Define plot titles

if(orderingFactor == "cMMb") {

featureNamePlot <- paste0(substr(orderingFactor, start = 1, stop = 2), "/",

substr(orderingFactor, start = 3, stop = 4), " ",

sub("_\\w+", "", libName), " peaks")

}

ranFeatNamePlot <- paste0("Random ",

sub("_\\w+", "", libName), " peaks")

ranLocNamePlot <- "Random loci"

# Define quantile colours

quantileColours <- c("red", "purple", "blue", "navy")

# Define feature start and end labels for plotting

featureStartLab <- "Start"

featureEndLab <- "End"

# Genomic definitions

chrs <- as.vector(read.table("wheat_v1.0.fa.sizes")[,1])

chrs <- chrs[-length(chrs)]

# Load table of features grouped into quantiles

# by decreasing cM/Mb

featuresDF <- read.table(paste0(outDir,

"features_", quantiles, "quantiles",

"_by_", orderingFactor,

"_of_", libName, "_peaks_in_",

paste0(featureName,

collapse = "_"), ".txt"),

header = T, sep = "\t", row.names = NULL, stringsAsFactors = F)

# Load features to confirm feature (row) ordering in "featuresDF" is the same

# as in "features" (which was used for generating the coverage matrices)

features <- lapply(seq_along(featureName), function(y) {

tmp <- read.table(paste0("/home/ajt200/analysis/wheat/", dirName,

"/snakemake_ChIPseq/mapped/both/peaks/PeakRanger1.18/ranger/p0.001_q0.01/",

libName,

"_rangerPeaksGRmergedOverlaps_minuslog10_p0.001_q0.01_noMinWidth_in_",

featureName[y], ".bed"),

header = F)

data.frame(tmp,

V7 = paste0(featureName[y], "_", tmp$V4),

stringsAsFactors = F)

})

# If features from multiple subgenomes and/or compartments are to be analysed,

# concatenate the corresponding feature data.frames

if(length(featureName) > 1) {

features <- do.call(rbind, features)

} else {

features <- features[[1]]

}

colnames(features) <- c("chr", "start", "end", "name", "score", "strand", "featureID")

stopifnot(identical(as.character(featuresDF$featureID),

as.character(features$featureID)))

rm(features); gc()

# Get row indices for each feature quantile

quantileIndices <- lapply(1:quantiles, function(k) {

which(featuresDF$quantile == paste0("Quantile ", k))

})

## Random feature quantiles

# Define function to randomly select n rows from

# a data.frame

selectRandomFeatures <- function(features, n) {

return(features[sample(x = dim(features)[1],

size = n,

replace = FALSE),])

}

# Define seed so that random selections are reproducible

set.seed(93750174)

# Divide features into random sets of equal number,

# with the same number of peaks per chromosome as

# above-defined orderingFactor-defined feature quantiles

randomPCIndices <- lapply(1:quantiles, function(k) {

randomPCIndicesk <- NULL

for(i in 1:length(chrs)) {

randomPCfeatureskChr <- selectRandomFeatures(features = featuresDF[featuresDF$seqnames == chrs[i],],

n = dim(featuresDF[featuresDF$quantile == paste0("Quantile ", k) &

featuresDF$seqnames == chrs[i],])[1])

randomPCIndicesk <- c(randomPCIndicesk, as.integer(rownames(randomPCfeatureskChr)))

}

randomPCIndicesk

})

# Confirm per-chromosome feature numbers are the same for quantiles and random groupings

lapply(seq_along(1:quantiles), function(k) {

sapply(seq_along(chrs), function(x) {

if(!identical(dim(featuresDF[randomPCIndices[[k]],][featuresDF[randomPCIndices[[k]],]$seqnames == chrs[x],]),

dim(featuresDF[quantileIndices[[k]],][featuresDF[quantileIndices[[k]],]$seqnames == chrs[x],]))) {

stop("Quantile features and random features do not consist of the same number of features per chromosome")

}

})

})

# Load feature matrices for each chromatin dataset, calculate log2(ChIP/control),

# and sort by decreasing log2mat1RegionRowMeans

ChIPNames <- c(

"DMC1_Rep1_ChIP",

"ASY1_CS_Rep1_ChIP",

"H3K4me3_Rep1_ChIP",

"H3K4me1_Rep1_ChIP_SRR8126618",

"H3K27ac_Rep1_ChIP_SRR8126621",

"H3K27me3_ChIP_SRR6350666",

"H3K9me2_Rep1_ChIP",

"H3K27me1_Rep1_ChIP"

)

ChIPNamesDir <- c(

"DMC1",

"ASY1_CS",

"H3K4me3",

"H3K4me1",

"H3K27ac",

"H3K27me3",

"H3K9me2",

"H3K27me1"

)

log2ChIPNamesPlot <- c(

"DMC1",

"ASY1",

"H3K4me3",

"H3K4me1",

"H3K27ac",

"H3K27me3",

"H3K9me2",

"H3K27me1"

)

log2ChIPColours <- c(

"green2",

"purple4",

"dodgerblue",

"forestgreen",

"goldenrod1",

"orange",

"navy",

"magenta3",

"firebrick1"

)

ChIPDirs <- sapply(seq_along(ChIPNames), function(x) {

if(ChIPNames[x] %in% c("H3K4me3_ChIP_SRR6350668",

"H3K27me3_ChIP_SRR6350666",

"H3K36me3_ChIP_SRR6350670",

"H3K9ac_ChIP_SRR6350667",

"CENH3_ChIP_SRR1686799")) {

paste0("/home/ajt200/analysis/wheat/epigenomics_shoot_leaf_IWGSC_2018_Science/",

ChIPNamesDir[x], "/snakemake_ChIPseq/mapped/DMC1peakProfiles/matrices/")

} else if(ChIPNames[x] %in% c("H3K4me1_Rep1_ChIP_SRR8126618",

"H3K27ac_Rep1_ChIP_SRR8126621")) {

paste0("/home/ajt200/analysis/wheat/epigenomics_seedlings_Li_2019_Genome_Biol/",

ChIPNamesDir[x], "/snakemake_ChIPseq/mapped/DMC1peakProfiles/matrices/")

} else {

paste0("/home/ajt200/analysis/wheat/",

ChIPNamesDir[x], "/snakemake_ChIPseq/mapped/DMC1peakProfiles/matrices/")

}

})

controlNames <- c(

"input_SRR6350669",

"MNase_Rep1"

)

controlNamesDir <- c(

"input",

"MNase"

)

controlNamesPlot <- c(

"Input",

"MNase"

)

controlColours <- c(

"grey40",

"darkcyan"

)

controlDirs <- sapply(seq_along(controlNames), function(x) {

if(controlNames[x] == "input_SRR6350669") {

paste0("/home/ajt200/analysis/wheat/epigenomics_shoot_leaf_IWGSC_2018_Science/",

controlNamesDir[x], "/snakemake_ChIPseq/mapped/DMC1peakProfiles/matrices/")

} else if(controlNames[x] == "MNase_Rep1") {

paste0("/home/ajt200/analysis/wheat/",

controlNamesDir[x], "/snakemake_ChIPseq/mapped/DMC1peakProfiles/matrices/")

} else {

if(!(controlNames %in% c("input_SRR6350669", "MNase_Rep1"))) {

stop(paste0("controlNames[", x, "] is neither input_SRR6350669 nor MNase_Rep1"))

}

}

})

otherNames <- c(

"MNase_Rep1",

"DNaseI_Rep1_SRR8447247",

"WT_RNAseq_Rep1_ERR2402974",

"WT_RNAseq_Rep2_ERR2402973",

"WT_RNAseq_Rep3_ERR2402972"

)

otherNamesDir <- c(

"MNase",

"DNaseI",

"RNAseq_meiocyte_Martin_Moore_2018_FrontPlantSci",

"RNAseq_meiocyte_Martin_Moore_2018_FrontPlantSci",

"RNAseq_meiocyte_Martin_Moore_2018_FrontPlantSci"

)

otherNamesPlot <- c(

"MNase",

"DNaseI",

"RNA-seq Rep1",

"RNA-seq Rep2",

"RNA-seq Rep3"

)

otherColours <- c(

"darkcyan",

"purple",

"red4",

"red4",

"red4"

)

otherDirs <- sapply(seq_along(otherNames), function(x) {

if(otherNames[x] %in% c("MNase_Rep1")) {

paste0("/home/ajt200/analysis/wheat/",

otherNamesDir[x], "/snakemake_ChIPseq/mapped/DMC1peakProfiles/matrices/")

} else if(otherNames[x] %in% c("DNaseI_Rep1_SRR8447247")) {

paste0("/home/ajt200/analysis/wheat/epigenomics_seedlings_Li_2019_Genome_Biol/",

otherNamesDir[x], "/snakemake_ChIPseq/mapped/DMC1peakProfiles/matrices/")

} else if(grepl("RNAseq", otherNames[x])) {

paste0("/home/ajt200/analysis/wheat/",

otherNamesDir[x], "/snakemake_RNAseq_HISAT2/mapped/DMC1peakProfiles/matrices/")

} else {

stop(paste0("otherNames[", x, "] is not compatible with the specified coverage matrix paths"))

}

})

DNAmethNames <- c(

"BSseq_Rep8a_SRR6792678"

)

DNAmethNamesDir <- c(

"BSseq"

)

DNAmethContexts <- c(

"CpG",

"CHG",

"CHH"

)

DNAmethNamesPlot <- c(

"mCG",

"mCHG",

"mCHH"

)

DNAmethColours <- c(

"navy",

"blue",

"deepskyblue1"

)

DNAmethDirs <- sapply(seq_along(DNAmethNames), function(x) {

if(DNAmethNames[x] %in% c("BSseq_Rep8a_SRR6792678")) {

paste0("/home/ajt200/analysis/wheat/epigenomics_shoot_leaf_IWGSC_2018_Science/",

DNAmethNamesDir[x],

"/snakemake_BSseq/coverage/DMC1peakProfiles/matrices/")

} else {

stop(paste0("DNAmethNames[", x, "] is not compatible with the specified coverage matrix paths"))

}

})

## control

# feature

control_featureMats <- mclapply(seq_along(controlNames), function(x) {

lapply(seq_along(featureName), function(y) {

as.matrix(read.table(paste0(controlDirs[x],

controlNames[x],

"_MappedOn_wheat_v1.0_lowXM_", align, "_sort_norm_",

dirName, "_peaks_in_", featureName[y], "_matrix_bin", binSize,

"bp_flank", sub(" ", "", flankName), ".tab"),

header = F, skip = 3))

})

}, mc.cores = length(controlNames))

# If features from multiple subgenomes and/or compartments are to be analysed,

# concatenate the corresponding feature coverage matrices

control_featureMats <- mclapply(seq_along(control_featureMats), function(x) {

if(length(featureName) > 1) {

do.call(rbind, control_featureMats[[x]])

} else {

control_featureMats[[x]][[1]]

}

}, mc.cores = length(control_featureMats))

# ranLoc

control_ranLocMats <- mclapply(seq_along(controlNames), function(x) {

lapply(seq_along(featureName), function(y) {

as.matrix(read.table(paste0(controlDirs[x],

controlNames[x],

"_MappedOn_wheat_v1.0_lowXM_", align, "_sort_norm_",

dirName, "_peaks_in_", featureName[y], "_ranLoc_matrix_bin", binSize,

"bp_flank", sub(" ", "", flankName), ".tab"),

header = F, skip = 3))

})

}, mc.cores = length(controlNames))

# If features from multiple subgenomes and/or compartments are to be analysed,

# concatenate the corresponding feature coverage matrices

control_ranLocMats <- mclapply(seq_along(control_ranLocMats), function(x) {

if(length(featureName) > 1) {

do.call(rbind, control_ranLocMats[[x]])

} else {

control_ranLocMats[[x]][[1]]

}

}, mc.cores = length(control_ranLocMats))

## ChIP

# feature

ChIP_featureMats <- mclapply(seq_along(ChIPNames), function(x) {

lapply(seq_along(featureName), function(y) {

as.matrix(read.table(paste0(ChIPDirs[x],

ChIPNames[x],

"_MappedOn_wheat_v1.0_lowXM_", align, "_sort_norm_",

dirName, "_peaks_in_", featureName[y], "_matrix_bin", binSize,

"bp_flank", sub(" ", "", flankName), ".tab"),

header = F, skip = 3))

})

}, mc.cores = length(ChIPNames))

# If features from multiple subgenomes and/or compartments are to be analysed,

# concatenate the corresponding feature coverage matrices

ChIP_featureMats <- mclapply(seq_along(ChIP_featureMats), function(x) {

if(length(featureName) > 1) {

do.call(rbind, ChIP_featureMats[[x]])

} else {

ChIP_featureMats[[x]][[1]]

}

}, mc.cores = length(ChIP_featureMats))

# Conditionally calculate log2(ChIP/input) or log2(ChIP/MNase)

# for each matrix depending on library

log2ChIP_featureMats <- mclapply(seq_along(ChIP_featureMats), function(x) {

if(ChIPNames[x] %in% c(

"ASY1_CS_Rep1_ChIP",

"DMC1_Rep1_ChIP",

"H3K4me3_ChIP_SRR6350668",

"H3K27me3_ChIP_SRR6350666",

"H3K36me3_ChIP_SRR6350670",

"H3K9ac_ChIP_SRR6350667",

"H3K4me1_Rep1_ChIP_SRR8126618",

"H3K27ac_Rep1_ChIP_SRR8126621"

)) {

print(paste0(ChIPNames[x], " was sonication-based; using ", controlNames[1], " for log2((ChIP+1)/(control+1)) calculation"))

log2((ChIP_featureMats[[x]]+1)/(control_featureMats[[1]]+1))

} else {

print(paste0(ChIPNames[x], " was MNase-based; using ", controlNames[2], " for log2((ChIP+1)/(control+1)) calculation"))

log2((ChIP_featureMats[[x]]+1)/(control_featureMats[[2]]+1))

}

}, mc.cores = length(ChIP_featureMats))

# ranLoc

ChIP_ranLocMats <- mclapply(seq_along(ChIPNames), function(x) {

lapply(seq_along(featureName), function(y) {

as.matrix(read.table(paste0(ChIPDirs[x],

ChIPNames[x],

"_MappedOn_wheat_v1.0_lowXM_", align, "_sort_norm_",

dirName, "_peaks_in_", featureName[y], "_ranLoc_matrix_bin", binSize,

"bp_flank", sub(" ", "", flankName), ".tab"),

header = F, skip = 3))

})

}, mc.cores = length(ChIPNames))

# If features from multiple subgenomes and/or compartments are to be analysed,

# concatenate the corresponding feature coverage matrices

ChIP_ranLocMats <- mclapply(seq_along(ChIP_ranLocMats), function(x) {

if(length(featureName) > 1) {

do.call(rbind, ChIP_ranLocMats[[x]])

} else {

ChIP_ranLocMats[[x]][[1]]

}

}, mc.cores = length(ChIP_ranLocMats))

# Conditionally calculate log2(ChIP/input) or log2(ChIP/MNase)

# for each matrix depending on library

log2ChIP_ranLocMats <- mclapply(seq_along(ChIP_ranLocMats), function(x) {

if(ChIPNames[x] %in% c(

"ASY1_CS_Rep1_ChIP",

"DMC1_Rep1_ChIP",

"H3K4me3_ChIP_SRR6350668",

"H3K27me3_ChIP_SRR6350666",

"H3K36me3_ChIP_SRR6350670",

"H3K9ac_ChIP_SRR6350667",

"H3K4me1_Rep1_ChIP_SRR8126618",

"H3K27ac_Rep1_ChIP_SRR8126621"

)) {

print(paste0(ChIPNames[x], " was sonication-based; using ", controlNames[1], " for log2((ChIP+1)/(control+1)) calculation"))

log2((ChIP_ranLocMats[[x]]+1)/(control_ranLocMats[[1]]+1))

} else {

print(paste0(ChIPNames[x], " was MNase-based; using ", controlNames[2], " for log2((ChIP+1)/(control+1)) calculation"))

log2((ChIP_ranLocMats[[x]]+1)/(control_ranLocMats[[2]]+1))

}

}, mc.cores = length(ChIP_ranLocMats))

# Add column names

for(x in seq_along(log2ChIP_featureMats)) {

colnames(log2ChIP_featureMats[[x]]) <- c(paste0("u", 1:(upstream/binSize)),

paste0("t", ((upstream/binSize)+1):((upstream+bodyLength)/binSize)),

paste0("d", (((upstream+bodyLength)/binSize)+1):(((upstream+bodyLength)/binSize)+(downstream/binSize))))

colnames(log2ChIP_ranLocMats[[x]]) <- c(paste0("u", 1:(upstream/binSize)),

paste0("t", ((upstream/binSize)+1):((upstream+bodyLength)/binSize)),

paste0("d", (((upstream+bodyLength)/binSize)+1):(((upstream+bodyLength)/binSize)+(downstream/binSize))))

}

# Subdivide coverage matrices into above-defined quantiles and random groupings

log2ChIP_mats_quantiles <- mclapply(seq_along(log2ChIP_featureMats), function(x) {

list(

# feature quantiles

lapply(1:quantiles, function(k) {

log2ChIP_featureMats[[x]][quantileIndices[[k]],]

}),

# feature random groupings

lapply(1:quantiles, function(k) {

log2ChIP_featureMats[[x]][randomPCIndices[[k]],]

}),

# random loci groupings

lapply(1:quantiles, function(k) {

log2ChIP_ranLocMats[[x]][quantileIndices[[k]],]

})

)

}, mc.cores = length(log2ChIP_featureMats))

# Transpose matrix and convert into dataframe

# in which first column is window name

wideDFfeature_list_log2ChIP <- mclapply(seq_along(log2ChIP_mats_quantiles), function(x) {

lapply(seq_along(log2ChIP_mats_quantiles[[x]]), function(y) {

lapply(seq_along(log2ChIP_mats_quantiles[[x]][[y]]), function(k) {

data.frame(window = colnames(log2ChIP_mats_quantiles[[x]][[y]][[k]]),

t(log2ChIP_mats_quantiles[[x]][[y]][[k]]))

})

})

}, mc.cores = length(log2ChIP_mats_quantiles))

# Convert into tidy data.frame (long format)

tidyDFfeature_list_log2ChIP <- mclapply(seq_along(wideDFfeature_list_log2ChIP), function(x) {

lapply(seq_along(log2ChIP_mats_quantiles[[x]]), function(y) {

lapply(seq_along(log2ChIP_mats_quantiles[[x]][[y]]), function(k) {

gather(data = wideDFfeature_list_log2ChIP[[x]][[y]][[k]],

key = feature,

value = coverage,

-window)

})

})

}, mc.cores = length(wideDFfeature_list_log2ChIP))

# Order levels of factor "window" so that sequential levels

# correspond to sequential windows

for(x in seq_along(tidyDFfeature_list_log2ChIP)) {

for(y in seq_along(log2ChIP_mats_quantiles[[x]])) {

for(k in seq_along(log2ChIP_mats_quantiles[[x]][[y]])) {

tidyDFfeature_list_log2ChIP[[x]][[y]][[k]]$window <- factor(tidyDFfeature_list_log2ChIP[[x]][[y]][[k]]$window,

levels = as.character(wideDFfeature_list_log2ChIP[[x]][[y]][[k]]$window))

}

}

}

# Create summary data.frame in which each row corresponds to a window (Column 1),

# Column2 is the number of coverage values (features) per window,

# Column3 is the mean of coverage values per window,

# Column4 is the standard deviation of coverage values per window,

# Column5 is the standard error of the mean of coverage values per window,

# Column6 is the lower bound of the 95% confidence interval, and

# Column7 is the upper bound of the 95% confidence interval

summaryDFfeature_list_log2ChIP <- mclapply(seq_along(tidyDFfeature_list_log2ChIP), function(x) {

lapply(seq_along(log2ChIP_mats_quantiles[[x]]), function(y) {

lapply(seq_along(log2ChIP_mats_quantiles[[x]][[y]]), function(k) {

data.frame(window = as.character(wideDFfeature_list_log2ChIP[[x]][[y]][[k]]$window),

n = tapply(X = tidyDFfeature_list_log2ChIP[[x]][[y]][[k]]$coverage,

INDEX = tidyDFfeature_list_log2ChIP[[x]][[y]][[k]]$window,

FUN = length),

mean = tapply(X = tidyDFfeature_list_log2ChIP[[x]][[y]][[k]]$coverage,

INDEX = tidyDFfeature_list_log2ChIP[[x]][[y]][[k]]$window,

FUN = mean,

na.rm = TRUE),

sd = tapply(X = tidyDFfeature_list_log2ChIP[[x]][[y]][[k]]$coverage,

INDEX = tidyDFfeature_list_log2ChIP[[x]][[y]][[k]]$window,

FUN = sd,

na.rm = TRUE))

})

})

}, mc.cores = length(tidyDFfeature_list_log2ChIP))

for(x in seq_along(summaryDFfeature_list_log2ChIP)) {

for(y in seq_along(log2ChIP_mats_quantiles[[x]])) {

for(k in seq_along(log2ChIP_mats_quantiles[[x]][[y]])) {

summaryDFfeature_list_log2ChIP[[x]][[y]][[k]]$window <- factor(summaryDFfeature_list_log2ChIP[[x]][[y]][[k]]$window,

levels = as.character(wideDFfeature_list_log2ChIP[[x]][[y]][[k]]$window))

summaryDFfeature_list_log2ChIP[[x]][[y]][[k]]$winNo <- factor(1:dim(summaryDFfeature_list_log2ChIP[[x]][[y]][[k]])[1])

summaryDFfeature_list_log2ChIP[[x]][[y]][[k]]$sem <- summaryDFfeature_list_log2ChIP[[x]][[y]][[k]]$sd/sqrt(summaryDFfeature_list_log2ChIP[[x]][[y]][[k]]$n-1)

summaryDFfeature_list_log2ChIP[[x]][[y]][[k]]$CI_lower <- summaryDFfeature_list_log2ChIP[[x]][[y]][[k]]$mean -

qt(0.975, df = summaryDFfeature_list_log2ChIP[[x]][[y]][[k]]$n-1)*summaryDFfeature_list_log2ChIP[[x]][[y]][[k]]$sem

summaryDFfeature_list_log2ChIP[[x]][[y]][[k]]$CI_upper <- summaryDFfeature_list_log2ChIP[[x]][[y]][[k]]$mean +

qt(0.975, df = summaryDFfeature_list_log2ChIP[[x]][[y]][[k]]$n-1)*summaryDFfeature_list_log2ChIP[[x]][[y]][[k]]$sem

}

}

}

quantileNames <- paste0(rep("Quantile ", quantiles), 1:quantiles)

randomPCNames <- paste0(rep("Random ", quantiles), 1:quantiles)

for(x in seq_along(summaryDFfeature_list_log2ChIP)) {

# feature quantiles

names(summaryDFfeature_list_log2ChIP[[x]][[1]]) <- quantileNames

# feature random groupings

names(summaryDFfeature_list_log2ChIP[[x]][[2]]) <- randomPCNames

# random loci groupings

names(summaryDFfeature_list_log2ChIP[[x]][[3]]) <- randomPCNames

}

# Convert list of lists of lists of feature quantiles summaryDFfeature_list_log2ChIP into

# a list of lists of single data.frames containing all feature quantiles for plotting

summaryDFfeature_log2ChIP <- mclapply(seq_along(summaryDFfeature_list_log2ChIP), function(x) {

lapply(seq_along(log2ChIP_mats_quantiles[[x]]), function(y) {

bind_rows(summaryDFfeature_list_log2ChIP[[x]][[y]], .id = "quantile")

})

}, mc.cores = length(summaryDFfeature_list_log2ChIP))

for(x in seq_along(summaryDFfeature_log2ChIP)) {

# feature quantiles

summaryDFfeature_log2ChIP[[x]][[1]]$quantile <- factor(summaryDFfeature_log2ChIP[[x]][[1]]$quantile,

levels = names(summaryDFfeature_list_log2ChIP[[x]][[1]]))

# feature random groupings

summaryDFfeature_log2ChIP[[x]][[2]]$quantile <- factor(summaryDFfeature_log2ChIP[[x]][[2]]$quantile,

levels = names(summaryDFfeature_list_log2ChIP[[x]][[2]]))

# random loci groupings

summaryDFfeature_log2ChIP[[x]][[3]]$quantile <- factor(summaryDFfeature_log2ChIP[[x]][[3]]$quantile,

levels = names(summaryDFfeature_list_log2ChIP[[x]][[3]]))

}

# Define y-axis limits

ymin_list_log2ChIP <- lapply(seq_along(summaryDFfeature_log2ChIP), function(x) {

min(c(summaryDFfeature_log2ChIP[[x]][[1]]$CI_lower,

summaryDFfeature_log2ChIP[[x]][[2]]$CI_lower,

summaryDFfeature_log2ChIP[[x]][[3]]$CI_lower))

})

ymax_list_log2ChIP <- lapply(seq_along(summaryDFfeature_log2ChIP), function(x) {

max(c(summaryDFfeature_log2ChIP[[x]][[1]]$CI_upper,

summaryDFfeature_log2ChIP[[x]][[2]]$CI_upper,

summaryDFfeature_log2ChIP[[x]][[3]]$CI_upper))

})

# Define legend labels

legendLabs_feature <- lapply(seq_along(quantileNames), function(x) {

grobTree(textGrob(bquote(.(quantileNames[x])),

x = legendPos[1], y = legendPos[2]-((x-1)*0.06), just = "left",

gp = gpar(col = quantileColours[x], fontsize = 18)))

})

legendLabs_ranFeat <- lapply(seq_along(randomPCNames), function(x) {

grobTree(textGrob(bquote(.(randomPCNames[x])),

x = legendPos[1], y = legendPos[2]-((x-1)*0.06), just = "left",

gp = gpar(col = quantileColours[x], fontsize = 18)))

})

legendLabs_ranLoc <- lapply(seq_along(randomPCNames), function(x) {

grobTree(textGrob(bquote(.(randomPCNames[x])),

x = legendPos[1], y = legendPos[2]-((x-1)*0.06), just = "left",

gp = gpar(col = quantileColours[x], fontsize = 18)))

})

# Plot average profiles with 95% CI ribbon

## feature

ggObj1_combined_log2ChIP <- mclapply(seq_along(log2ChIPNamesPlot), function(x) {

summaryDFfeature <- summaryDFfeature_log2ChIP[[x]][[1]]

ggplot(data = summaryDFfeature,

mapping = aes(x = winNo,

y = mean,

group = quantile)

) +

geom_line(data = summaryDFfeature,

mapping = aes(colour = quantile),

size = 1) +

scale_colour_manual(values = quantileColours) +

geom_ribbon(data = summaryDFfeature,

mapping = aes(ymin = CI_lower,

ymax = CI_upper,

fill = quantile),

alpha = 0.4) +

scale_fill_manual(values = quantileColours) +

scale_y_continuous(limits = c(ymin_list_log2ChIP[[x]], ymax_list_log2ChIP[[x]]),

labels = function(x) sprintf("%6.3f", x)) +

scale_x_discrete(breaks = c(1,

(upstream/binSize)+1,

(dim(summaryDFfeature_log2ChIP[[x]][[1]])[1]/quantiles)-(downstream/binSize),

dim(summaryDFfeature_log2ChIP[[x]][[1]])[1]/quantiles),

labels = c(paste0("-", flankName),

featureStartLab,

featureEndLab,

paste0("+", flankName))) +

geom_vline(xintercept = c((upstream/binSize)+1,

(dim(summaryDFfeature_log2ChIP[[x]][[1]])[1]/quantiles)-(downstream/binSize)),

linetype = "dashed",

size = 1) +

labs(x = "",

y = log2ChIPNamesPlot[x]) +

annotation_custom(legendLabs_feature[[1]]) +

annotation_custom(legendLabs_feature[[2]]) +

annotation_custom(legendLabs_feature[[3]]) +

annotation_custom(legendLabs_feature[[4]]) +

theme_bw() +

theme(

axis.ticks = element_line(size = 1.0, colour = "black"),

axis.ticks.length = unit(0.25, "cm"),

axis.text.x = element_text(size = 22, colour = "black"),

axis.text.y = element_text(size = 18, colour = "black", family = "Luxi Mono"),

axis.title = element_text(size = 30, colour = log2ChIPColours[x]),

legend.position = "none",

panel.grid = element_blank(),

panel.border = element_rect(size = 3.5, colour = "black"),

panel.background = element_blank(),

plot.margin = unit(c(0.3,1.2,0.0,0.3), "cm"),

plot.title = element_text(hjust = 1.0, size = 30)) +

ggtitle(bquote(.(featureNamePlot) ~ "(" * italic("n") ~ "=" ~

.(prettyNum(summaryDFfeature$n[1],

big.mark = ",", trim = T)) *

")"))

}, mc.cores = length(log2ChIPNamesPlot))

## ranFeat

ggObj2_combined_log2ChIP <- mclapply(seq_along(log2ChIPNamesPlot), function(x) {

summaryDFfeature <- summaryDFfeature_log2ChIP[[x]][[2]]

ggplot(data = summaryDFfeature,

mapping = aes(x = winNo,

y = mean,

group = quantile)

) +

geom_line(data = summaryDFfeature,

mapping = aes(colour = quantile),

size = 1) +

scale_colour_manual(values = quantileColours) +

geom_ribbon(data = summaryDFfeature,

mapping = aes(ymin = CI_lower,

ymax = CI_upper,

fill = quantile),

alpha = 0.4) +

scale_fill_manual(values = quantileColours) +

scale_y_continuous(limits = c(ymin_list_log2ChIP[[x]], ymax_list_log2ChIP[[x]]),

labels = function(x) sprintf("%6.3f", x)) +

scale_x_discrete(breaks = c(1,

(upstream/binSize)+1,

(dim(summaryDFfeature_log2ChIP[[x]][[2]])[1]/quantiles)-(downstream/binSize),

dim(summaryDFfeature_log2ChIP[[x]][[2]])[1]/quantiles),

labels = c(paste0("-", flankName),

featureStartLab,

featureEndLab,

paste0("+", flankName))) +

geom_vline(xintercept = c((upstream/binSize)+1,

(dim(summaryDFfeature_log2ChIP[[x]][[2]])[1]/quantiles)-(downstream/binSize)),

linetype = "dashed",

size = 1) +

labs(x = "",

y = log2ChIPNamesPlot[x]) +

annotation_custom(legendLabs_ranFeat[[1]]) +

annotation_custom(legendLabs_ranFeat[[2]]) +

annotation_custom(legendLabs_ranFeat[[3]]) +

annotation_custom(legendLabs_ranFeat[[4]]) +

theme_bw() +

theme(

axis.ticks = element_line(size = 1.0, colour = "black"),

axis.ticks.length = unit(0.25, "cm"),

axis.text.x = element_text(size = 22, colour = "black"),

axis.text.y = element_text(size = 18, colour = "black", family = "Luxi Mono"),

axis.title = element_text(size = 30, colour = log2ChIPColours[x]),

legend.position = "none",

panel.grid = element_blank(),

panel.border = element_rect(size = 3.5, colour = "black"),

panel.background = element_blank(),

plot.margin = unit(c(0.3,1.2,0.0,0.3), "cm"),

plot.title = element_text(hjust = 1.0, size = 30)) +

ggtitle(bquote(.(ranFeatNamePlot) ~ "(" * italic("n") ~ "=" ~

.(prettyNum(summaryDFfeature$n[1],

big.mark = ",", trim = T)) *

")"))

}, mc.cores = length(log2ChIPNamesPlot))

## ranLoc

ggObj3_combined_log2ChIP <- mclapply(seq_along(log2ChIPNamesPlot), function(x) {

summaryDFfeature <- summaryDFfeature_log2ChIP[[x]][[3]]

ggplot(data = summaryDFfeature,

mapping = aes(x = winNo,

y = mean,

group = quantile)

) +

geom_line(data = summaryDFfeature,

mapping = aes(colour = quantile),

size = 1) +

scale_colour_manual(values = quantileColours) +

geom_ribbon(data = summaryDFfeature,

mapping = aes(ymin = CI_lower,

ymax = CI_upper,

fill = quantile),

alpha = 0.4) +

scale_fill_manual(values = quantileColours) +

scale_y_continuous(limits = c(ymin_list_log2ChIP[[x]], ymax_list_log2ChIP[[x]]),

labels = function(x) sprintf("%6.3f", x)) +

scale_x_discrete(breaks = c(1,

(upstream/binSize)+1,

(dim(summaryDFfeature_log2ChIP[[x]][[3]])[1]/quantiles)-(downstream/binSize),

dim(summaryDFfeature_log2ChIP[[x]][[3]])[1]/quantiles),

labels = c(paste0("-", flankName),

"Start",

"End",

paste0("+", flankName))) +

geom_vline(xintercept = c((upstream/binSize)+1,

(dim(summaryDFfeature_log2ChIP[[x]][[3]])[1]/quantiles)-(downstream/binSize)),

linetype = "dashed",

size = 1) +

labs(x = "",

y = log2ChIPNamesPlot[x]) +

annotation_custom(legendLabs_ranLoc[[1]]) +

annotation_custom(legendLabs_ranLoc[[2]]) +

annotation_custom(legendLabs_ranLoc[[3]]) +

annotation_custom(legendLabs_ranLoc[[4]]) +

theme_bw() +

theme(

axis.ticks = element_line(size = 1.0, colour = "black"),

axis.ticks.length = unit(0.25, "cm"),

axis.text.x = element_text(size = 22, colour = "black"),

axis.text.y = element_text(size = 18, colour = "black", family = "Luxi Mono"),

axis.title = element_text(size = 30, colour = log2ChIPColours[x]),

legend.position = "none",

panel.grid = element_blank(),

panel.border = element_rect(size = 3.5, colour = "black"),

panel.background = element_blank(),

plot.margin = unit(c(0.3,1.2,0.0,0.3), "cm"),

plot.title = element_text(hjust = 1.0, size = 30)) +

ggtitle(bquote(.(ranLocNamePlot) ~ "(" * italic("n") ~ "=" ~

.(prettyNum(summaryDFfeature$n[1],

big.mark = ",", trim = T)) *

")"))

}, mc.cores = length(log2ChIPNamesPlot))

ggObjGA_combined <- grid.arrange(grobs = c(

ggObj1_combined_log2ChIP,

ggObj2_combined_log2ChIP,

ggObj3_combined_log2ChIP

),

layout_matrix = cbind(

1:length(c(log2ChIPNamesPlot)),

(length(c(log2ChIPNamesPlot))+1):(length(c(log2ChIPNamesPlot))*2),

((length(c(log2ChIPNamesPlot))*2)+1):(length(c(log2ChIPNamesPlot))*3)

))

ggsave(paste0(plotDir,

"log2ChIPcontrol_avgProfiles_around_", quantiles, "quantiles",

"_by_", orderingFactor,

"_of_", libName, "_peaks_in_",

paste0(featureName,

collapse = "_"), ".pdf"),

plot = ggObjGA_combined,

height = 6.5*length(c(log2ChIPNamesPlot)), width = 21, limitsize = FALSE)

#### Free up memory by removing no longer required objects

rm(

ChIP_featureMats, ChIP_ranLocMats,

control_featureMats, control_ranLocMats,

log2ChIP_featureMats, log2ChIP_ranLocMats,

log2ChIP_mats_quantiles,

wideDFfeature_list_log2ChIP,

tidyDFfeature_list_log2ChIP,

summaryDFfeature_list_log2ChIP,

summaryDFfeature_log2ChIP

)

gc()

#####

## other

# feature

other_featureMats <- mclapply(seq_along(otherNames), function(x) {

lapply(seq_along(featureName), function(y) {

otherFile <- system(paste0("ls ", otherDirs[x],

otherNames[x],

"_MappedOn_wheat_v1.0*", align, "_sort_norm_",

dirName, "_peaks_in_", featureName[y], "_matrix_bin", binSize,

"bp_flank", sub(" ", "", flankName), ".tab"),

intern = T)

as.matrix(read.table(otherFile,

header = F, skip = 3))

})

}, mc.cores = length(otherNames))

# If features from multiple subgenomes and/or compartments are to be analysed,

# concatenate the corresponding feature coverage matrices

other_featureMats <- mclapply(seq_along(other_featureMats), function(x) {

if(length(featureName) > 1) {

do.call(rbind, other_featureMats[[x]])

} else {

other_featureMats[[x]][[1]]

}

}, mc.cores = length(other_featureMats))

# ranLoc

other_ranLocMats <- mclapply(seq_along(otherNames), function(x) {

lapply(seq_along(featureName), function(y) {

otherFile <- system(paste0("ls ", otherDirs[x],

otherNames[x],

"_MappedOn_wheat_v1.0*", align, "_sort_norm_",

dirName, "_peaks_in_", featureName[y], "_ranLoc_matrix_bin", binSize,

"bp_flank", sub(" ", "", flankName), ".tab"),

intern = T)

as.matrix(read.table(otherFile,

header = F, skip = 3))

})

}, mc.cores = length(otherNames))

# If features from multiple subgenomes and/or compartments are to be analysed,

# concatenate the corresponding feature coverage matrices

other_ranLocMats <- mclapply(seq_along(other_ranLocMats), function(x) {

if(length(featureName) > 1) {

do.call(rbind, other_ranLocMats[[x]])

} else {

other_ranLocMats[[x]][[1]]

}

}, mc.cores = length(other_ranLocMats))

# Add column names

for(x in seq_along(other_featureMats)) {

colnames(other_featureMats[[x]]) <- c(paste0("u", 1:(upstream/binSize)),

paste0("t", ((upstream/binSize)+1):((upstream+bodyLength)/binSize)),

paste0("d", (((upstream+bodyLength)/binSize)+1):(((upstream+bodyLength)/binSize)+(downstream/binSize))))

colnames(other_ranLocMats[[x]]) <- c(paste0("u", 1:(upstream/binSize)),

paste0("t", ((upstream/binSize)+1):((upstream+bodyLength)/binSize)),

paste0("d", (((upstream+bodyLength)/binSize)+1):(((upstream+bodyLength)/binSize)+(downstream/binSize))))

}

# Subdivide coverage matrices into above-defined quantiles and random groupings

other_mats_quantiles <- mclapply(seq_along(other_featureMats), function(x) {

list(

# feature quantiles

lapply(1:quantiles, function(k) {

other_featureMats[[x]][quantileIndices[[k]],]

}),

# feature random groupings

lapply(1:quantiles, function(k) {

other_featureMats[[x]][randomPCIndices[[k]],]

}),

# random loci groupings

lapply(1:quantiles, function(k) {

other_ranLocMats[[x]][quantileIndices[[k]],]

})

)

}, mc.cores = length(other_featureMats))

# Transpose matrix and convert into dataframe

# in which first column is window name

wideDFfeature_list_other <- mclapply(seq_along(other_mats_quantiles), function(x) {

lapply(seq_along(other_mats_quantiles[[x]]), function(y) {

lapply(seq_along(other_mats_quantiles[[x]][[y]]), function(k) {

data.frame(window = colnames(other_mats_quantiles[[x]][[y]][[k]]),

t(other_mats_quantiles[[x]][[y]][[k]]))

})

})

}, mc.cores = length(other_mats_quantiles))

# Convert into tidy data.frame (long format)

tidyDFfeature_list_other <- mclapply(seq_along(wideDFfeature_list_other), function(x) {

lapply(seq_along(other_mats_quantiles[[x]]), function(y) {

lapply(seq_along(other_mats_quantiles[[x]][[y]]), function(k) {

gather(data = wideDFfeature_list_other[[x]][[y]][[k]],

key = feature,

value = coverage,

-window)

})

})

}, mc.cores = length(wideDFfeature_list_other))

# Order levels of factor "window" so that sequential levels

# correspond to sequential windows

for(x in seq_along(tidyDFfeature_list_other)) {

for(y in seq_along(other_mats_quantiles[[x]])) {

for(k in seq_along(other_mats_quantiles[[x]][[y]])) {

tidyDFfeature_list_other[[x]][[y]][[k]]$window <- factor(tidyDFfeature_list_other[[x]][[y]][[k]]$window,

levels = as.character(wideDFfeature_list_other[[x]][[y]][[k]]$window))

}

}

}

# Create summary data.frame in which each row corresponds to a window (Column 1),

# Column2 is the number of coverage values (features) per window,

# Column3 is the mean of coverage values per window,

# Column4 is the standard deviation of coverage values per window,

# Column5 is the standard error of the mean of coverage values per window,

# Column6 is the lower bound of the 95% confidence interval, and

# Column7 is the upper bound of the 95% confidence interval

summaryDFfeature_list_other <- mclapply(seq_along(tidyDFfeature_list_other), function(x) {

lapply(seq_along(other_mats_quantiles[[x]]), function(y) {

lapply(seq_along(other_mats_quantiles[[x]][[y]]), function(k) {

data.frame(window = as.character(wideDFfeature_list_other[[x]][[y]][[k]]$window),

n = tapply(X = tidyDFfeature_list_other[[x]][[y]][[k]]$coverage,

INDEX = tidyDFfeature_list_other[[x]][[y]][[k]]$window,

FUN = length),

mean = tapply(X = tidyDFfeature_list_other[[x]][[y]][[k]]$coverage,

INDEX = tidyDFfeature_list_other[[x]][[y]][[k]]$window,

FUN = mean,

na.rm = TRUE),

sd = tapply(X = tidyDFfeature_list_other[[x]][[y]][[k]]$coverage,

INDEX = tidyDFfeature_list_other[[x]][[y]][[k]]$window,

FUN = sd,

na.rm = TRUE))

})

})

}, mc.cores = length(tidyDFfeature_list_other))

for(x in seq_along(summaryDFfeature_list_other)) {

for(y in seq_along(other_mats_quantiles[[x]])) {

for(k in seq_along(other_mats_quantiles[[x]][[y]])) {

summaryDFfeature_list_other[[x]][[y]][[k]]$window <- factor(summaryDFfeature_list_other[[x]][[y]][[k]]$window,

levels = as.character(wideDFfeature_list_other[[x]][[y]][[k]]$window))

summaryDFfeature_list_other[[x]][[y]][[k]]$winNo <- factor(1:dim(summaryDFfeature_list_other[[x]][[y]][[k]])[1])

summaryDFfeature_list_other[[x]][[y]][[k]]$sem <- summaryDFfeature_list_other[[x]][[y]][[k]]$sd/sqrt(summaryDFfeature_list_other[[x]][[y]][[k]]$n-1)

summaryDFfeature_list_other[[x]][[y]][[k]]$CI_lower <- summaryDFfeature_list_other[[x]][[y]][[k]]$mean -

qt(0.975, df = summaryDFfeature_list_other[[x]][[y]][[k]]$n-1)*summaryDFfeature_list_other[[x]][[y]][[k]]$sem

summaryDFfeature_list_other[[x]][[y]][[k]]$CI_upper <- summaryDFfeature_list_other[[x]][[y]][[k]]$mean +

qt(0.975, df = summaryDFfeature_list_other[[x]][[y]][[k]]$n-1)*summaryDFfeature_list_other[[x]][[y]][[k]]$sem

}

}

}

quantileNames <- paste0(rep("Quantile ", quantiles), 1:quantiles)

randomPCNames <- paste0(rep("Random ", quantiles), 1:quantiles)

for(x in seq_along(summaryDFfeature_list_other)) {

# feature quantiles

names(summaryDFfeature_list_other[[x]][[1]]) <- quantileNames

# feature random groupings

names(summaryDFfeature_list_other[[x]][[2]]) <- randomPCNames

# random loci groupings

names(summaryDFfeature_list_other[[x]][[3]]) <- randomPCNames

}

# Convert list of lists of lists of feature quantiles summaryDFfeature_list_other into

# a list of lists of single data.frames containing all feature quantiles for plotting

summaryDFfeature_other <- mclapply(seq_along(summaryDFfeature_list_other), function(x) {

lapply(seq_along(other_mats_quantiles[[x]]), function(y) {

bind_rows(summaryDFfeature_list_other[[x]][[y]], .id = "quantile")

})

}, mc.cores = length(summaryDFfeature_list_other))

for(x in seq_along(summaryDFfeature_other)) {

# feature quantiles

summaryDFfeature_other[[x]][[1]]$quantile <- factor(summaryDFfeature_other[[x]][[1]]$quantile,

levels = names(summaryDFfeature_list_other[[x]][[1]]))

# feature random groupings

summaryDFfeature_other[[x]][[2]]$quantile <- factor(summaryDFfeature_other[[x]][[2]]$quantile,

levels = names(summaryDFfeature_list_other[[x]][[2]]))

# random loci groupings

summaryDFfeature_other[[x]][[3]]$quantile <- factor(summaryDFfeature_other[[x]][[3]]$quantile,

levels = names(summaryDFfeature_list_other[[x]][[3]]))

}

# Define y-axis limits

ymin_list_other <- lapply(seq_along(summaryDFfeature_other), function(x) {

min(c(summaryDFfeature_other[[x]][[1]]$CI_lower,

summaryDFfeature_other[[x]][[2]]$CI_lower,

summaryDFfeature_other[[x]][[3]]$CI_lower))

})

ymax_list_other <- lapply(seq_along(summaryDFfeature_other), function(x) {

max(c(summaryDFfeature_other[[x]][[1]]$CI_upper,

summaryDFfeature_other[[x]][[2]]$CI_upper,

summaryDFfeature_other[[x]][[3]]$CI_upper))

})

# Define legend labels

legendLabs_feature <- lapply(seq_along(quantileNames), function(x) {

grobTree(textGrob(bquote(.(quantileNames[x])),

x = legendPos[1], y = legendPos[2]-((x-1)*0.06), just = "left",

gp = gpar(col = quantileColours[x], fontsize = 18)))

})

legendLabs_ranFeat <- lapply(seq_along(randomPCNames), function(x) {

grobTree(textGrob(bquote(.(randomPCNames[x])),

x = legendPos[1], y = legendPos[2]-((x-1)*0.06), just = "left",

gp = gpar(col = quantileColours[x], fontsize = 18)))

})

legendLabs_ranLoc <- lapply(seq_along(randomPCNames), function(x) {

grobTree(textGrob(bquote(.(randomPCNames[x])),

x = legendPos[1], y = legendPos[2]-((x-1)*0.06), just = "left",

gp = gpar(col = quantileColours[x], fontsize = 18)))

})

# Plot average profiles with 95% CI ribbon

## feature

ggObj1_combined_other <- mclapply(seq_along(otherNamesPlot), function(x) {

summaryDFfeature <- summaryDFfeature_other[[x]][[1]]

ggplot(data = summaryDFfeature,

mapping = aes(x = winNo,

y = mean,

group = quantile)

) +

geom_line(data = summaryDFfeature,

mapping = aes(colour = quantile),

size = 1) +

scale_colour_manual(values = quantileColours) +

geom_ribbon(data = summaryDFfeature,

mapping = aes(ymin = CI_lower,

ymax = CI_upper,

fill = quantile),

alpha = 0.4) +

scale_fill_manual(values = quantileColours) +

scale_y_continuous(limits = c(ymin_list_other[[x]], ymax_list_other[[x]]),

labels = function(x) sprintf("%6.3f", x)) +

scale_x_discrete(breaks = c(1,

(upstream/binSize)+1,

(dim(summaryDFfeature_other[[x]][[1]])[1]/quantiles)-(downstream/binSize),

dim(summaryDFfeature_other[[x]][[1]])[1]/quantiles),

labels = c(paste0("-", flankName),

featureStartLab,

featureEndLab,

paste0("+", flankName))) +

geom_vline(xintercept = c((upstream/binSize)+1,

(dim(summaryDFfeature_other[[x]][[1]])[1]/quantiles)-(downstream/binSize)),

linetype = "dashed",

size = 1) +

labs(x = "",

y = otherNamesPlot[x]) +

annotation_custom(legendLabs_feature[[1]]) +

annotation_custom(legendLabs_feature[[2]]) +

annotation_custom(legendLabs_feature[[3]]) +

annotation_custom(legendLabs_feature[[4]]) +

theme_bw() +

theme(

axis.ticks = element_line(size = 1.0, colour = "black"),

axis.ticks.length = unit(0.25, "cm"),

axis.text.x = element_text(size = 22, colour = "black"),

axis.text.y = element_text(size = 18, colour = "black", family = "Luxi Mono"),

axis.title = element_text(size = 30, colour = otherColours[x]),

legend.position = "none",

panel.grid = element_blank(),

panel.border = element_rect(size = 3.5, colour = "black"),

panel.background = element_blank(),

plot.margin = unit(c(0.3,1.2,0.0,0.3), "cm"),

plot.title = element_text(hjust = 1.0, size = 30)) +

ggtitle(bquote(.(featureNamePlot) ~ "(" * italic("n") ~ "=" ~

.(prettyNum(summaryDFfeature$n[1],

big.mark = ",", trim = T)) *

")"))

}, mc.cores = length(otherNamesPlot))

## ranFeat

ggObj2_combined_other <- mclapply(seq_along(otherNamesPlot), function(x) {

summaryDFfeature <- summaryDFfeature_other[[x]][[2]]

ggplot(data = summaryDFfeature,

mapping = aes(x = winNo,

y = mean,

group = quantile)

) +

geom_line(data = summaryDFfeature,

mapping = aes(colour = quantile),

size = 1) +

scale_colour_manual(values = quantileColours) +

geom_ribbon(data = summaryDFfeature,

mapping = aes(ymin = CI_lower,

ymax = CI_upper,

fill = quantile),

alpha = 0.4) +

scale_fill_manual(values = quantileColours) +

scale_y_continuous(limits = c(ymin_list_other[[x]], ymax_list_other[[x]]),

labels = function(x) sprintf("%6.3f", x)) +

scale_x_discrete(breaks = c(1,

(upstream/binSize)+1,

(dim(summaryDFfeature_other[[x]][[2]])[1]/quantiles)-(downstream/binSize),

dim(summaryDFfeature_other[[x]][[2]])[1]/quantiles),

labels = c(paste0("-", flankName),

featureStartLab,

featureEndLab,

paste0("+", flankName))) +

geom_vline(xintercept = c((upstream/binSize)+1,

(dim(summaryDFfeature_other[[x]][[2]])[1]/quantiles)-(downstream/binSize)),

linetype = "dashed",

size = 1) +

labs(x = "",

y = otherNamesPlot[x]) +

annotation_custom(legendLabs_ranFeat[[1]]) +

annotation_custom(legendLabs_ranFeat[[2]]) +

annotation_custom(legendLabs_ranFeat[[3]]) +

annotation_custom(legendLabs_ranFeat[[4]]) +

theme_bw() +

theme(

axis.ticks = element_line(size = 1.0, colour = "black"),

axis.ticks.length = unit(0.25, "cm"),

axis.text.x = element_text(size = 22, colour = "black"),

axis.text.y = element_text(size = 18, colour = "black", family = "Luxi Mono"),

axis.title = element_text(size = 30, colour = otherColours[x]),

legend.position = "none",

panel.grid = element_blank(),

panel.border = element_rect(size = 3.5, colour = "black"),

panel.background = element_blank(),

plot.margin = unit(c(0.3,1.2,0.0,0.3), "cm"),

plot.title = element_text(hjust = 1.0, size = 30)) +

ggtitle(bquote(.(ranFeatNamePlot) ~ "(" * italic("n") ~ "=" ~

.(prettyNum(summaryDFfeature$n[1],

big.mark = ",", trim = T)) *

")"))

}, mc.cores = length(otherNamesPlot))

## ranLoc

ggObj3_combined_other <- mclapply(seq_along(otherNamesPlot), function(x) {

summaryDFfeature <- summaryDFfeature_other[[x]][[3]]

ggplot(data = summaryDFfeature,

mapping = aes(x = winNo,

y = mean,

group = quantile)

) +

geom_line(data = summaryDFfeature,

mapping = aes(colour = quantile),

size = 1) +

scale_colour_manual(values = quantileColours) +

geom_ribbon(data = summaryDFfeature,

mapping = aes(ymin = CI_lower,

ymax = CI_upper,

fill = quantile),

alpha = 0.4) +

scale_fill_manual(values = quantileColours) +

scale_y_continuous(limits = c(ymin_list_other[[x]], ymax_list_other[[x]]),

labels = function(x) sprintf("%6.3f", x)) +

scale_x_discrete(breaks = c(1,

(upstream/binSize)+1,

(dim(summaryDFfeature_other[[x]][[3]])[1]/quantiles)-(downstream/binSize),

dim(summaryDFfeature_other[[x]][[3]])[1]/quantiles),

labels = c(paste0("-", flankName),

"Start",

"End",

paste0("+", flankName))) +

geom_vline(xintercept = c((upstream/binSize)+1,

(dim(summaryDFfeature_other[[x]][[3]])[1]/quantiles)-(downstream/binSize)),

linetype = "dashed",

size = 1) +

labs(x = "",

y = otherNamesPlot[x]) +

annotation_custom(legendLabs_ranLoc[[1]]) +

annotation_custom(legendLabs_ranLoc[[2]]) +

annotation_custom(legendLabs_ranLoc[[3]]) +

annotation_custom(legendLabs_ranLoc[[4]]) +

theme_bw() +

theme(

axis.ticks = element_line(size = 1.0, colour = "black"),

axis.ticks.length = unit(0.25, "cm"),

axis.text.x = element_text(size = 22, colour = "black"),

axis.text.y = element_text(size = 18, colour = "black", family = "Luxi Mono"),

axis.title = element_text(size = 30, colour = otherColours[x]),

legend.position = "none",

panel.grid = element_blank(),

panel.border = element_rect(size = 3.5, colour = "black"),

panel.background = element_blank(),

plot.margin = unit(c(0.3,1.2,0.0,0.3), "cm"),

plot.title = element_text(hjust = 1.0, size = 30)) +

ggtitle(bquote(.(ranLocNamePlot) ~ "(" * italic("n") ~ "=" ~

.(prettyNum(summaryDFfeature$n[1],

big.mark = ",", trim = T)) *

")"))

}, mc.cores = length(otherNamesPlot))

ggObjGA_combined <- grid.arrange(grobs = c(

ggObj1_combined_other,

ggObj2_combined_other,

ggObj3_combined_other

),

layout_matrix = cbind(

1:length(c(otherNamesPlot)),

(length(c(otherNamesPlot))+1):(length(c(otherNamesPlot))*2),

((length(c(otherNamesPlot))*2)+1):(length(c(otherNamesPlot))*3)

))

ggsave(paste0(plotDir,

"other_avgProfiles_around_", quantiles, "quantiles",

"_by_", orderingFactor,

"_of_", libName, "_peaks_in_",

paste0(featureName,

collapse = "_"), ".pdf"),

plot = ggObjGA_combined,

height = 6.5*length(c(otherNamesPlot)), width = 21, limitsize = FALSE)

#### Free up memory by removing no longer required objects

rm(

other_featureMats, other_ranLocMats,

other_mats_quantiles,

wideDFfeature_list_other,

tidyDFfeature_list_other,

summaryDFfeature_list_other,

summaryDFfeature_other

)

gc()

#####

## DNAmeth

# feature

DNAmeth_featureMats <- mclapply(seq_along(DNAmethContexts), function(x) {

lapply(seq_along(featureName), function(y) {

as.matrix(read.table(paste0(DNAmethDirs,

DNAmethNames,

"_MappedOn_wheat_v1.0_incl_organelles_controls_dedup_", DNAmethContexts[x], "_",

dirName, "_peaks_in_", featureName[y], "_matrix_bin", binSize,

"bp_flank", sub(" ", "", flankName), ".tab"),

header = F, skip = 3))

})

}, mc.cores = length(DNAmethContexts))

# If features from multiple subgenomes and/or compartments are to be analysed,

# concatenate the corresponding feature coverage matrices

DNAmeth_featureMats <- mclapply(seq_along(DNAmeth_featureMats), function(x) {

if(length(featureName) > 1) {

do.call(rbind, DNAmeth_featureMats[[x]])

} else {

DNAmeth_featureMats[[x]][[1]]

}

}, mc.cores = length(DNAmeth_featureMats))

# ranLoc

DNAmeth_ranLocMats <- mclapply(seq_along(DNAmethContexts), function(x) {

lapply(seq_along(featureName), function(y) {

as.matrix(read.table(paste0(DNAmethDirs,

DNAmethNames,

"_MappedOn_wheat_v1.0_incl_organelles_controls_dedup_", DNAmethContexts[x], "_",

dirName, "_peaks_in_", featureName[y], "_ranLoc_matrix_bin", binSize,

"bp_flank", sub(" ", "", flankName), ".tab"),

header = F, skip = 3))

})

}, mc.cores = length(DNAmethContexts))

# If features from multiple subgenomes and/or compartments are to be analysed,

# concatenate the corresponding feature coverage matrices

DNAmeth_ranLocMats <- mclapply(seq_along(DNAmeth_ranLocMats), function(x) {

if(length(featureName) > 1) {

do.call(rbind, DNAmeth_ranLocMats[[x]])

} else {

DNAmeth_ranLocMats[[x]][[1]]

}

}, mc.cores = length(DNAmeth_ranLocMats))

# Add column names

for(x in seq_along(DNAmeth_featureMats)) {

colnames(DNAmeth_featureMats[[x]]) <- c(paste0("u", 1:(upstream/binSize)),

paste0("t", ((upstream/binSize)+1):((upstream+bodyLength)/binSize)),

paste0("d", (((upstream+bodyLength)/binSize)+1):(((upstream+bodyLength)/binSize)+(downstream/binSize))))

colnames(DNAmeth_ranLocMats[[x]]) <- c(paste0("u", 1:(upstream/binSize)),

paste0("t", ((upstream/binSize)+1):((upstream+bodyLength)/binSize)),

paste0("d", (((upstream+bodyLength)/binSize)+1):(((upstream+bodyLength)/binSize)+(downstream/binSize))))

}

# Subdivide coverage matrices into above-defined quantiles and random groupings

DNAmeth_mats_quantiles <- mclapply(seq_along(DNAmeth_featureMats), function(x) {

list(

# feature quantiles

lapply(1:quantiles, function(k) {

DNAmeth_featureMats[[x]][quantileIndices[[k]],]

}),

# feature random groupings

lapply(1:quantiles, function(k) {

DNAmeth_featureMats[[x]][randomPCIndices[[k]],]

}),

# random loci groupings

lapply(1:quantiles, function(k) {

DNAmeth_ranLocMats[[x]][quantileIndices[[k]],]

})

)

}, mc.cores = length(DNAmeth_featureMats))

# Transpose matrix and convert into dataframe

# in which first column is window name

wideDFfeature_list_DNAmeth <- mclapply(seq_along(DNAmeth_mats_quantiles), function(x) {

lapply(seq_along(DNAmeth_mats_quantiles[[x]]), function(y) {

lapply(seq_along(DNAmeth_mats_quantiles[[x]][[y]]), function(k) {

data.frame(window = colnames(DNAmeth_mats_quantiles[[x]][[y]][[k]]),

t(DNAmeth_mats_quantiles[[x]][[y]][[k]]))

})

})

}, mc.cores = length(DNAmeth_mats_quantiles))

# Convert into tidy data.frame (long format)

tidyDFfeature_list_DNAmeth <- mclapply(seq_along(wideDFfeature_list_DNAmeth), function(x) {

lapply(seq_along(DNAmeth_mats_quantiles[[x]]), function(y) {

lapply(seq_along(DNAmeth_mats_quantiles[[x]][[y]]), function(k) {

gather(data = wideDFfeature_list_DNAmeth[[x]][[y]][[k]],

key = feature,

value = coverage,

-window)

})

})

}, mc.cores = length(wideDFfeature_list_DNAmeth))

# Order levels of factor "window" so that sequential levels

# correspond to sequential windows

for(x in seq_along(tidyDFfeature_list_DNAmeth)) {

for(y in seq_along(DNAmeth_mats_quantiles[[x]])) {

for(k in seq_along(DNAmeth_mats_quantiles[[x]][[y]])) {

tidyDFfeature_list_DNAmeth[[x]][[y]][[k]]$window <- factor(tidyDFfeature_list_DNAmeth[[x]][[y]][[k]]$window,

levels = as.character(wideDFfeature_list_DNAmeth[[x]][[y]][[k]]$window))

}

}

}

# Create summary data.frame in which each row corresponds to a window (Column 1),

# Column2 is the number of coverage values (features) per window,

# Column3 is the mean of coverage values per window,

# Column4 is the standard deviation of coverage values per window,

# Column5 is the standard error of the mean of coverage values per window,

# Column6 is the lower bound of the 95% confidence interval, and

# Column7 is the upper bound of the 95% confidence interval

summaryDFfeature_list_DNAmeth <- mclapply(seq_along(tidyDFfeature_list_DNAmeth), function(x) {

lapply(seq_along(DNAmeth_mats_quantiles[[x]]), function(y) {

lapply(seq_along(DNAmeth_mats_quantiles[[x]][[y]]), function(k) {

data.frame(window = as.character(wideDFfeature_list_DNAmeth[[x]][[y]][[k]]$window),

n = tapply(X = tidyDFfeature_list_DNAmeth[[x]][[y]][[k]]$coverage,

INDEX = tidyDFfeature_list_DNAmeth[[x]][[y]][[k]]$window,

FUN = length),

mean = tapply(X = tidyDFfeature_list_DNAmeth[[x]][[y]][[k]]$coverage,

INDEX = tidyDFfeature_list_DNAmeth[[x]][[y]][[k]]$window,

FUN = mean,

na.rm = TRUE),

sd = tapply(X = tidyDFfeature_list_DNAmeth[[x]][[y]][[k]]$coverage,

INDEX = tidyDFfeature_list_DNAmeth[[x]][[y]][[k]]$window,

FUN = sd,

na.rm = TRUE))

})

})

}, mc.cores = length(tidyDFfeature_list_DNAmeth))

for(x in seq_along(summaryDFfeature_list_DNAmeth)) {

for(y in seq_along(DNAmeth_mats_quantiles[[x]])) {

for(k in seq_along(DNAmeth_mats_quantiles[[x]][[y]])) {

summaryDFfeature_list_DNAmeth[[x]][[y]][[k]]$window <- factor(summaryDFfeature_list_DNAmeth[[x]][[y]][[k]]$window,

levels = as.character(wideDFfeature_list_DNAmeth[[x]][[y]][[k]]$window))

summaryDFfeature_list_DNAmeth[[x]][[y]][[k]]$winNo <- factor(1:dim(summaryDFfeature_list_DNAmeth[[x]][[y]][[k]])[1])

summaryDFfeature_list_DNAmeth[[x]][[y]][[k]]$sem <- summaryDFfeature_list_DNAmeth[[x]][[y]][[k]]$sd/sqrt(summaryDFfeature_list_DNAmeth[[x]][[y]][[k]]$n-1)

summaryDFfeature_list_DNAmeth[[x]][[y]][[k]]$CI_lower <- summaryDFfeature_list_DNAmeth[[x]][[y]][[k]]$mean -

qt(0.975, df = summaryDFfeature_list_DNAmeth[[x]][[y]][[k]]$n-1)*summaryDFfeature_list_DNAmeth[[x]][[y]][[k]]$sem

summaryDFfeature_list_DNAmeth[[x]][[y]][[k]]$CI_upper <- summaryDFfeature_list_DNAmeth[[x]][[y]][[k]]$mean +

qt(0.975, df = summaryDFfeature_list_DNAmeth[[x]][[y]][[k]]$n-1)*summaryDFfeature_list_DNAmeth[[x]][[y]][[k]]$sem

}

}

}

quantileNames <- paste0(rep("Quantile ", quantiles), 1:quantiles)

randomPCNames <- paste0(rep("Random ", quantiles), 1:quantiles)

for(x in seq_along(summaryDFfeature_list_DNAmeth)) {

# feature quantiles

names(summaryDFfeature_list_DNAmeth[[x]][[1]]) <- quantileNames

# feature random groupings

names(summaryDFfeature_list_DNAmeth[[x]][[2]]) <- randomPCNames

# random loci groupings

names(summaryDFfeature_list_DNAmeth[[x]][[3]]) <- randomPCNames

}

# Convert list of lists of lists of feature quantiles summaryDFfeature_list_DNAmeth into

# a list of lists of single data.frames containing all feature quantiles for plotting

summaryDFfeature_DNAmeth <- mclapply(seq_along(summaryDFfeature_list_DNAmeth), function(x) {

lapply(seq_along(DNAmeth_mats_quantiles[[x]]), function(y) {

bind_rows(summaryDFfeature_list_DNAmeth[[x]][[y]], .id = "quantile")

})

}, mc.cores = length(summaryDFfeature_list_DNAmeth))

for(x in seq_along(summaryDFfeature_DNAmeth)) {

# feature quantiles

summaryDFfeature_DNAmeth[[x]][[1]]$quantile <- factor(summaryDFfeature_DNAmeth[[x]][[1]]$quantile,

levels = names(summaryDFfeature_list_DNAmeth[[x]][[1]]))

# feature random groupings

summaryDFfeature_DNAmeth[[x]][[2]]$quantile <- factor(summaryDFfeature_DNAmeth[[x]][[2]]$quantile,

levels = names(summaryDFfeature_list_DNAmeth[[x]][[2]]))

# random loci groupings

summaryDFfeature_DNAmeth[[x]][[3]]$quantile <- factor(summaryDFfeature_DNAmeth[[x]][[3]]$quantile,

levels = names(summaryDFfeature_list_DNAmeth[[x]][[3]]))

}

# Define y-axis limits

ymin_list_DNAmeth <- lapply(seq_along(summaryDFfeature_DNAmeth), function(x) {

min(c(summaryDFfeature_DNAmeth[[x]][[1]]$CI_lower,

summaryDFfeature_DNAmeth[[x]][[2]]$CI_lower,

summaryDFfeature_DNAmeth[[x]][[3]]$CI_lower))

})

ymax_list_DNAmeth <- lapply(seq_along(summaryDFfeature_DNAmeth), function(x) {

max(c(summaryDFfeature_DNAmeth[[x]][[1]]$CI_upper,

summaryDFfeature_DNAmeth[[x]][[2]]$CI_upper,

summaryDFfeature_DNAmeth[[x]][[3]]$CI_upper))

})

# Define legend labels

legendLabs_feature <- lapply(seq_along(quantileNames), function(x) {

grobTree(textGrob(bquote(.(quantileNames[x])),

x = legendPos[1], y = legendPos[2]-((x-1)*0.06), just = "left",

gp = gpar(col = quantileColours[x], fontsize = 18)))

})

legendLabs_ranFeat <- lapply(seq_along(randomPCNames), function(x) {

grobTree(textGrob(bquote(.(randomPCNames[x])),

x = legendPos[1], y = legendPos[2]-((x-1)*0.06), just = "left",

gp = gpar(col = quantileColours[x], fontsize = 18)))

})

legendLabs_ranLoc <- lapply(seq_along(randomPCNames), function(x) {

grobTree(textGrob(bquote(.(randomPCNames[x])),

x = legendPos[1], y = legendPos[2]-((x-1)*0.06), just = "left",

gp = gpar(col = quantileColours[x], fontsize = 18)))

})

# Plot average profiles with 95% CI ribbon

## feature

ggObj1_combined_DNAmeth <- mclapply(seq_along(DNAmethNamesPlot), function(x) {

summaryDFfeature <- summaryDFfeature_DNAmeth[[x]][[1]]

ggplot(data = summaryDFfeature,

mapping = aes(x = winNo,

y = mean,

group = quantile)

) +

geom_line(data = summaryDFfeature,

mapping = aes(colour = quantile),

size = 1) +

scale_colour_manual(values = quantileColours) +

geom_ribbon(data = summaryDFfeature,

mapping = aes(ymin = CI_lower,

ymax = CI_upper,

fill = quantile),

alpha = 0.4) +

scale_fill_manual(values = quantileColours) +

scale_y_continuous(limits = c(ymin_list_DNAmeth[[x]], ymax_list_DNAmeth[[x]]),

labels = function(x) sprintf("%6.3f", x)) +

scale_x_discrete(breaks = c(1,

(upstream/binSize)+1,

(dim(summaryDFfeature_DNAmeth[[x]][[1]])[1]/quantiles)-(downstream/binSize),

dim(summaryDFfeature_DNAmeth[[x]][[1]])[1]/quantiles),

labels = c(paste0("-", flankName),

featureStartLab,

featureEndLab,

paste0("+", flankName))) +

geom_vline(xintercept = c((upstream/binSize)+1,

(dim(summaryDFfeature_DNAmeth[[x]][[1]])[1]/quantiles)-(downstream/binSize)),

linetype = "dashed",

size = 1) +

labs(x = "",

y = DNAmethNamesPlot[x]) +

annotation_custom(legendLabs_feature[[1]]) +

annotation_custom(legendLabs_feature[[2]]) +

annotation_custom(legendLabs_feature[[3]]) +

annotation_custom(legendLabs_feature[[4]]) +

theme_bw() +

theme(

axis.ticks = element_line(size = 1.0, colour = "black"),

axis.ticks.length = unit(0.25, "cm"),

axis.text.x = element_text(size = 22, colour = "black"),

axis.text.y = element_text(size = 18, colour = "black", family = "Luxi Mono"),

axis.title = element_text(size = 30, colour = DNAmethColours[x]),

legend.position = "none",

panel.grid = element_blank(),

panel.border = element_rect(size = 3.5, colour = "black"),

panel.background = element_blank(),

plot.margin = unit(c(0.3,1.2,0.0,0.3), "cm"),

plot.title = element_text(hjust = 1.0, size = 30)) +

ggtitle(bquote(.(featureNamePlot) ~ "(" * italic("n") ~ "=" ~

.(prettyNum(summaryDFfeature$n[1],

big.mark = ",", trim = T)) *

")"))

}, mc.cores = length(DNAmethNamesPlot))

## ranFeat

ggObj2_combined_DNAmeth <- mclapply(seq_along(DNAmethNamesPlot), function(x) {

summaryDFfeature <- summaryDFfeature_DNAmeth[[x]][[2]]

ggplot(data = summaryDFfeature,

mapping = aes(x = winNo,

y = mean,

group = quantile)

) +

geom_line(data = summaryDFfeature,

mapping = aes(colour = quantile),

size = 1) +

scale_colour_manual(values = quantileColours) +

geom_ribbon(data = summaryDFfeature,

mapping = aes(ymin = CI_lower,

ymax = CI_upper,

fill = quantile),

alpha = 0.4) +

scale_fill_manual(values = quantileColours) +

scale_y_continuous(limits = c(ymin_list_DNAmeth[[x]], ymax_list_DNAmeth[[x]]),

labels = function(x) sprintf("%6.3f", x)) +

scale_x_discrete(breaks = c(1,

(upstream/binSize)+1,

(dim(summaryDFfeature_DNAmeth[[x]][[2]])[1]/quantiles)-(downstream/binSize),

dim(summaryDFfeature_DNAmeth[[x]][[2]])[1]/quantiles),

labels = c(paste0("-", flankName),

featureStartLab,

featureEndLab,

paste0("+", flankName))) +

geom_vline(xintercept = c((upstream/binSize)+1,

(dim(summaryDFfeature_DNAmeth[[x]][[2]])[1]/quantiles)-(downstream/binSize)),

linetype = "dashed",

size = 1) +

labs(x = "",

y = DNAmethNamesPlot[x]) +

annotation_custom(legendLabs_ranFeat[[1]]) +

annotation_custom(legendLabs_ranFeat[[2]]) +

annotation_custom(legendLabs_ranFeat[[3]]) +

annotation_custom(legendLabs_ranFeat[[4]]) +

theme_bw() +

theme(

axis.ticks = element_line(size = 1.0, colour = "black"),

axis.ticks.length = unit(0.25, "cm"),

axis.text.x = element_text(size = 22, colour = "black"),

axis.text.y = element_text(size = 18, colour = "black", family = "Luxi Mono"),

axis.title = element_text(size = 30, colour = DNAmethColours[x]),

legend.position = "none",

panel.grid = element_blank(),

panel.border = element_rect(size = 3.5, colour = "black"),

panel.background = element_blank(),

plot.margin = unit(c(0.3,1.2,0.0,0.3), "cm"),

plot.title = element_text(hjust = 1.0, size = 30)) +

ggtitle(bquote(.(ranFeatNamePlot) ~ "(" * italic("n") ~ "=" ~

.(prettyNum(summaryDFfeature$n[1],

big.mark = ",", trim = T)) *

")"))

}, mc.cores = length(DNAmethNamesPlot))

## ranLoc

ggObj3_combined_DNAmeth <- mclapply(seq_along(DNAmethNamesPlot), function(x) {

summaryDFfeature <- summaryDFfeature_DNAmeth[[x]][[3]]

ggplot(data = summaryDFfeature,

mapping = aes(x = winNo,

y = mean,

group = quantile)

) +

geom_line(data = summaryDFfeature,

mapping = aes(colour = quantile),

size = 1) +

scale_colour_manual(values = quantileColours) +

geom_ribbon(data = summaryDFfeature,

mapping = aes(ymin = CI_lower,

ymax = CI_upper,

fill = quantile),

alpha = 0.4) +

scale_fill_manual(values = quantileColours) +

scale_y_continuous(limits = c(ymin_list_DNAmeth[[x]], ymax_list_DNAmeth[[x]]),

labels = function(x) sprintf("%6.3f", x)) +

scale_x_discrete(breaks = c(1,

(upstream/binSize)+1,

(dim(summaryDFfeature_DNAmeth[[x]][[3]])[1]/quantiles)-(downstream/binSize),

dim(summaryDFfeature_DNAmeth[[x]][[3]])[1]/quantiles),

labels = c(paste0("-", flankName),

"Start",

"End",

paste0("+", flankName))) +

geom_vline(xintercept = c((upstream/binSize)+1,

(dim(summaryDFfeature_DNAmeth[[x]][[3]])[1]/quantiles)-(downstream/binSize)),

linetype = "dashed",

size = 1) +

labs(x = "",

y = DNAmethNamesPlot[x]) +

annotation_custom(legendLabs_ranLoc[[1]]) +

annotation_custom(legendLabs_ranLoc[[2]]) +

annotation_custom(legendLabs_ranLoc[[3]]) +

annotation_custom(legendLabs_ranLoc[[4]]) +

theme_bw() +

theme(

axis.ticks = element_line(size = 1.0, colour = "black"),

axis.ticks.length = unit(0.25, "cm"),

axis.text.x = element_text(size = 22, colour = "black"),

axis.text.y = element_text(size = 18, colour = "black", family = "Luxi Mono"),

axis.title = element_text(size = 30, colour = DNAmethColours[x]),

legend.position = "none",

panel.grid = element_blank(),

panel.border = element_rect(size = 3.5, colour = "black"),

panel.background = element_blank(),

plot.margin = unit(c(0.3,1.2,0.0,0.3), "cm"),

plot.title = element_text(hjust = 1.0, size = 30)) +

ggtitle(bquote(.(ranLocNamePlot) ~ "(" * italic("n") ~ "=" ~

.(prettyNum(summaryDFfeature$n[1],

big.mark = ",", trim = T)) *

")"))

}, mc.cores = length(DNAmethNamesPlot))

ggObjGA_combined <- grid.arrange(grobs = c(

ggObj1_combined_DNAmeth,

ggObj2_combined_DNAmeth,

ggObj3_combined_DNAmeth

),

layout_matrix = cbind(

1:length(c(DNAmethNamesPlot)),

(length(c(DNAmethNamesPlot))+1):(length(c(DNAmethNamesPlot))*2),

((length(c(DNAmethNamesPlot))*2)+1):(length(c(DNAmethNamesPlot))*3)

))

ggsave(paste0(plotDir,

"DNAmeth_avgProfiles_around_", quantiles, "quantiles",

"_by_", orderingFactor,

"_of_", libName, "_peaks_in_",

paste0(featureName,

collapse = "_"), ".pdf"),

plot = ggObjGA_combined,

height = 6.5*length(c(DNAmethNamesPlot)), width = 21, limitsize = FALSE)

#### Free up memory by removing no longer required objects

rm(

DNAmeth_featureMats, DNAmeth_ranLocMats,

DNAmeth_mats_quantiles,

wideDFfeature_list_DNAmeth,

tidyDFfeature_list_DNAmeth,

summaryDFfeature_list_DNAmeth,

summaryDFfeature_DNAmeth

)

gc()

#####

# exome SNPclasses

SNPclassNames <- c(

"all",

"transition",

"transversion"

)

SNPclassNamesPlot <- c(

"Exome SNPs",

"Transitions",

"Transversions"

)

# feature

SNPclass_featureMats <- mclapply(seq_along(SNPclassNames), function(x) {

lapply(seq_along(featureName), function(y) {

as.matrix(read.table(paste0("/home/ajt200/analysis/wheat/DMC1/snakemake_ChIPseq/mapped/DMC1peakProfiles/matrices/",

"exome_", SNPclassNames[x],

"_SNPs_around_", dirName, "_peaks_in_", featureName[y],

"_matrix_bin", binSize, "bp_flank", sub(" ", "", flankName), ".tab"),

header = T))

})

}, mc.cores = length(SNPclassNames))

# If features from multiple subgenomes and/or compartments are to be analysed,

# concatenate the corresponding feature coverage matrices

SNPclass_featureMats <- mclapply(seq_along(SNPclass_featureMats), function(x) {

if(length(featureName) > 1) {

do.call(rbind, SNPclass_featureMats[[x]])

} else {

SNPclass_featureMats[[x]][[1]]

}

}, mc.cores = length(SNPclass_featureMats))

# ranLoc

SNPclass_ranLocMats <- mclapply(seq_along(SNPclassNames), function(x) {

lapply(seq_along(featureName), function(y) {

as.matrix(read.table(paste0("/home/ajt200/analysis/wheat/DMC1/snakemake_ChIPseq/mapped/DMC1peakProfiles/matrices/",

"exome_", SNPclassNames[x],

"_SNPs_around_", dirName, "_peaks_in_", featureName[y],

"_ranLoc_matrix_bin", binSize, "bp_flank", sub(" ", "", flankName), ".tab"),

header = T))

})

}, mc.cores = length(SNPclassNames))

# If features from multiple subgenomes and/or compartments are to be analysed,

# concatenate the corresponding feature coverage matrices

SNPclass_ranLocMats <- mclapply(seq_along(SNPclass_ranLocMats), function(x) {

if(length(featureName) > 1) {

do.call(rbind, SNPclass_ranLocMats[[x]])

} else {

SNPclass_ranLocMats[[x]][[1]]

}

}, mc.cores = length(SNPclass_ranLocMats))

# Add column names

for(x in seq_along(SNPclass_featureMats)) {

colnames(SNPclass_featureMats[[x]]) <- c(paste0("u", 1:(upstream/binSize)),

paste0("t", ((upstream/binSize)+1):((upstream+bodyLength)/binSize)),

paste0("d", (((upstream+bodyLength)/binSize)+1):(((upstream+bodyLength)/binSize)+(downstream/binSize))))

colnames(SNPclass_ranLocMats[[x]]) <- c(paste0("u", 1:(upstream/binSize)),

paste0("t", ((upstream/binSize)+1):((upstream+bodyLength)/binSize)),

paste0("d", (((upstream+bodyLength)/binSize)+1):(((upstream+bodyLength)/binSize)+(downstream/binSize))))

}

# Subdivide coverage matrices into above-defined quantiles and random groupings

SNPclass_mats_quantiles <- mclapply(seq_along(SNPclass_featureMats), function(x) {

list(

# feature quantiles

lapply(1:quantiles, function(k) {

SNPclass_featureMats[[x]][quantileIndices[[k]],]

}),

# feature random groupings

lapply(1:quantiles, function(k) {

SNPclass_featureMats[[x]][randomPCIndices[[k]],]

}),

# random loci groupings

lapply(1:quantiles, function(k) {

SNPclass_ranLocMats[[x]][quantileIndices[[k]],]

})

)

}, mc.cores = length(SNPclass_featureMats))

# Transpose matrix and convert into dataframe

# in which first column is window name

wideDFfeature_list_SNPclass <- mclapply(seq_along(SNPclass_mats_quantiles), function(x) {

lapply(seq_along(SNPclass_mats_quantiles[[x]]), function(y) {

lapply(seq_along(SNPclass_mats_quantiles[[x]][[y]]), function(k) {

data.frame(window = colnames(SNPclass_mats_quantiles[[x]][[y]][[k]]),

t(SNPclass_mats_quantiles[[x]][[y]][[k]]))

})

})

}, mc.cores = length(SNPclass_mats_quantiles)/2)

# Convert into tidy data.frame (long format)

tidyDFfeature_list_SNPclass <- mclapply(seq_along(wideDFfeature_list_SNPclass), function(x) {

lapply(seq_along(SNPclass_mats_quantiles[[x]]), function(y) {

lapply(seq_along(SNPclass_mats_quantiles[[x]][[y]]), function(k) {

gather(data = wideDFfeature_list_SNPclass[[x]][[y]][[k]],

key = feature,

value = coverage,

-window)

})

})

}, mc.cores = length(wideDFfeature_list_SNPclass)/2)

# Order levels of factor "window" so that sequential levels

# correspond to sequential windows

for(x in seq_along(tidyDFfeature_list_SNPclass)) {

for(y in seq_along(SNPclass_mats_quantiles[[x]])) {

for(k in seq_along(SNPclass_mats_quantiles[[x]][[y]])) {

tidyDFfeature_list_SNPclass[[x]][[y]][[k]]$window <- factor(tidyDFfeature_list_SNPclass[[x]][[y]][[k]]$window,

levels = as.character(wideDFfeature_list_SNPclass[[x]][[y]][[k]]$window))

}

}

}

# Create summary data.frame in which each row corresponds to a window (Column 1),

# Column2 is the number of coverage values (features) per window,

# Column3 is the mean of coverage values per window,

# Column4 is the standard deviation of coverage values per window,

# Column5 is the standard error of the mean of coverage values per window,

# Column6 is the lower bound of the 95% confidence interval, and

# Column7 is the upper bound of the 95% confidence interval

summaryDFfeature_list_SNPclass <- mclapply(seq_along(tidyDFfeature_list_SNPclass), function(x) {

lapply(seq_along(SNPclass_mats_quantiles[[x]]), function(y) {

lapply(seq_along(SNPclass_mats_quantiles[[x]][[y]]), function(k) {

data.frame(window = as.character(wideDFfeature_list_SNPclass[[x]][[y]][[k]]$window),

n = tapply(X = tidyDFfeature_list_SNPclass[[x]][[y]][[k]]$coverage,

INDEX = tidyDFfeature_list_SNPclass[[x]][[y]][[k]]$window,

FUN = length),

mean = tapply(X = tidyDFfeature_list_SNPclass[[x]][[y]][[k]]$coverage,

INDEX = tidyDFfeature_list_SNPclass[[x]][[y]][[k]]$window,

FUN = mean,

na.rm = TRUE),

sd = tapply(X = tidyDFfeature_list_SNPclass[[x]][[y]][[k]]$coverage,

INDEX = tidyDFfeature_list_SNPclass[[x]][[y]][[k]]$window,

FUN = sd,

na.rm = TRUE))

})

})

}, mc.cores = length(tidyDFfeature_list_SNPclass)/2)

for(x in seq_along(summaryDFfeature_list_SNPclass)) {

for(y in seq_along(SNPclass_mats_quantiles[[x]])) {

for(k in seq_along(SNPclass_mats_quantiles[[x]][[y]])) {

summaryDFfeature_list_SNPclass[[x]][[y]][[k]]$window <- factor(summaryDFfeature_list_SNPclass[[x]][[y]][[k]]$window,

levels = as.character(wideDFfeature_list_SNPclass[[x]][[y]][[k]]$window))

summaryDFfeature_list_SNPclass[[x]][[y]][[k]]$winNo <- factor(1:dim(summaryDFfeature_list_SNPclass[[x]][[y]][[k]])[1])

summaryDFfeature_list_SNPclass[[x]][[y]][[k]]$sem <- summaryDFfeature_list_SNPclass[[x]][[y]][[k]]$sd/sqrt(summaryDFfeature_list_SNPclass[[x]][[y]][[k]]$n-1)

summaryDFfeature_list_SNPclass[[x]][[y]][[k]]$CI_lower <- summaryDFfeature_list_SNPclass[[x]][[y]][[k]]$mean -

qt(0.975, df = summaryDFfeature_list_SNPclass[[x]][[y]][[k]]$n-1)*summaryDFfeature_list_SNPclass[[x]][[y]][[k]]$sem

summaryDFfeature_list_SNPclass[[x]][[y]][[k]]$CI_upper <- summaryDFfeature_list_SNPclass[[x]][[y]][[k]]$mean +

qt(0.975, df = summaryDFfeature_list_SNPclass[[x]][[y]][[k]]$n-1)*summaryDFfeature_list_SNPclass[[x]][[y]][[k]]$sem

}

}

}

quantileNames <- paste0(rep("Quantile ", quantiles), 1:quantiles)

randomPCNames <- paste0(rep("Random ", quantiles), 1:quantiles)

for(x in seq_along(summaryDFfeature_list_SNPclass)) {

# feature quantiles

names(summaryDFfeature_list_SNPclass[[x]][[1]]) <- quantileNames

# feature random groupings

names(summaryDFfeature_list_SNPclass[[x]][[2]]) <- randomPCNames

# random loci groupings

names(summaryDFfeature_list_SNPclass[[x]][[3]]) <- randomPCNames

}

# Convert list of lists of lists of feature quantiles summaryDFfeature_list_SNPclass into

# a list of lists of single data.frames containing all feature quantiles for plotting

summaryDFfeature_SNPclass <- mclapply(seq_along(summaryDFfeature_list_SNPclass), function(x) {

lapply(seq_along(SNPclass_mats_quantiles[[x]]), function(y) {

bind_rows(summaryDFfeature_list_SNPclass[[x]][[y]], .id = "quantile")

})

}, mc.cores = length(summaryDFfeature_list_SNPclass))

for(x in seq_along(summaryDFfeature_SNPclass)) {

# feature quantiles

summaryDFfeature_SNPclass[[x]][[1]]$quantile <- factor(summaryDFfeature_SNPclass[[x]][[1]]$quantile,

levels = names(summaryDFfeature_list_SNPclass[[x]][[1]]))

# feature random groupings

summaryDFfeature_SNPclass[[x]][[2]]$quantile <- factor(summaryDFfeature_SNPclass[[x]][[2]]$quantile,

levels = names(summaryDFfeature_list_SNPclass[[x]][[2]]))

# random loci groupings

summaryDFfeature_SNPclass[[x]][[3]]$quantile <- factor(summaryDFfeature_SNPclass[[x]][[3]]$quantile,

levels = names(summaryDFfeature_list_SNPclass[[x]][[3]]))

}

# Define y-axis limits

ymin_list_SNPclass <- lapply(seq_along(summaryDFfeature_SNPclass), function(x) {

min(c(summaryDFfeature_SNPclass[[x]][[1]]$CI_lower,

summaryDFfeature_SNPclass[[x]][[2]]$CI_lower,

summaryDFfeature_SNPclass[[x]][[3]]$CI_lower))

})

ymax_list_SNPclass <- lapply(seq_along(summaryDFfeature_SNPclass), function(x) {

max(c(summaryDFfeature_SNPclass[[x]][[1]]$CI_upper,

summaryDFfeature_SNPclass[[x]][[2]]$CI_upper,

summaryDFfeature_SNPclass[[x]][[3]]$CI_upper))

})

# Define legend labels

legendLabs_feature <- lapply(seq_along(quantileNames), function(x) {

grobTree(textGrob(bquote(.(quantileNames[x])),

x = legendPos[1], y = legendPos[2]-((x-1)*0.06), just = "left",

gp = gpar(col = quantileColours[x], fontsize = 18)))

})

legendLabs_ranFeat <- lapply(seq_along(randomPCNames), function(x) {

grobTree(textGrob(bquote(.(randomPCNames[x])),

x = legendPos[1], y = legendPos[2]-((x-1)*0.06), just = "left",

gp = gpar(col = quantileColours[x], fontsize = 18)))

})

legendLabs_ranLoc <- lapply(seq_along(randomPCNames), function(x) {

grobTree(textGrob(bquote(.(randomPCNames[x])),

x = legendPos[1], y = legendPos[2]-((x-1)*0.06), just = "left",

gp = gpar(col = quantileColours[x], fontsize = 18)))

})

# Plot average profiles with 95% CI ribbon

## feature

ggObj1_combined_SNPclass <- mclapply(seq_along(SNPclassNamesPlot), function(x) {

summaryDFfeature <- summaryDFfeature_SNPclass[[x]][[1]]

ggplot(data = summaryDFfeature,

mapping = aes(x = winNo,

y = mean,

group = quantile)

) +

geom_line(data = summaryDFfeature,

mapping = aes(colour = quantile),

size = 1) +

scale_colour_manual(values = quantileColours) +

geom_ribbon(data = summaryDFfeature,

mapping = aes(ymin = CI_lower,

ymax = CI_upper,

fill = quantile),

alpha = 0.4) +

scale_fill_manual(values = quantileColours) +

scale_y_continuous(limits = c(ymin_list_SNPclass[[x]], ymax_list_SNPclass[[x]]),

labels = function(x) sprintf("%6.3f", x)) +

scale_x_discrete(breaks = c(1,

(upstream/binSize)+1,

(dim(summaryDFfeature_SNPclass[[x]][[1]])[1]/quantiles)-(downstream/binSize),

dim(summaryDFfeature_SNPclass[[x]][[1]])[1]/quantiles),

labels = c(paste0("-", flankName),

featureStartLab,

featureEndLab,

paste0("+", flankName))) +

geom_vline(xintercept = c((upstream/binSize)+1,

(dim(summaryDFfeature_SNPclass[[x]][[1]])[1]/quantiles)-(downstream/binSize)),

linetype = "dashed",

size = 1) +

labs(x = "",

y = SNPclassNamesPlot[x]) +

annotation_custom(legendLabs_feature[[1]]) +

annotation_custom(legendLabs_feature[[2]]) +

annotation_custom(legendLabs_feature[[3]]) +

annotation_custom(legendLabs_feature[[4]]) +

theme_bw() +

theme(

axis.ticks = element_line(size = 1.0, colour = "black"),

axis.ticks.length = unit(0.25, "cm"),

axis.text.x = element_text(size = 22, colour = "black"),

axis.text.y = element_text(size = 18, colour = "black", family = "Luxi Mono"),

axis.title = element_text(size = 30, colour = "black"),

legend.position = "none",

panel.grid = element_blank(),

panel.border = element_rect(size = 3.5, colour = "black"),

panel.background = element_blank(),

plot.margin = unit(c(0.3,1.2,0.0,0.3), "cm"),

plot.title = element_text(hjust = 1.0, size = 30)) +

ggtitle(bquote(.(featureNamePlot) ~ "(" * italic("n") ~ "=" ~

.(prettyNum(summaryDFfeature$n[1],

big.mark = ",", trim = T)) *

")"))

}, mc.cores = length(SNPclassNamesPlot))

## ranFeat

ggObj2_combined_SNPclass <- mclapply(seq_along(SNPclassNamesPlot), function(x) {

summaryDFfeature <- summaryDFfeature_SNPclass[[x]][[2]]

ggplot(data = summaryDFfeature,

mapping = aes(x = winNo,

y = mean,

group = quantile)

) +

geom_line(data = summaryDFfeature,

mapping = aes(colour = quantile),

size = 1) +

scale_colour_manual(values = quantileColours) +

geom_ribbon(data = summaryDFfeature,

mapping = aes(ymin = CI_lower,

ymax = CI_upper,

fill = quantile),

alpha = 0.4) +

scale_fill_manual(values = quantileColours) +

scale_y_continuous(limits = c(ymin_list_SNPclass[[x]], ymax_list_SNPclass[[x]]),

labels = function(x) sprintf("%6.3f", x)) +

scale_x_discrete(breaks = c(1,

(upstream/binSize)+1,

(dim(summaryDFfeature_SNPclass[[x]][[2]])[1]/quantiles)-(downstream/binSize),

dim(summaryDFfeature_SNPclass[[x]][[2]])[1]/quantiles),

labels = c(paste0("-", flankName),

featureStartLab,

featureEndLab,

paste0("+", flankName))) +

geom_vline(xintercept = c((upstream/binSize)+1,

(dim(summaryDFfeature_SNPclass[[x]][[2]])[1]/quantiles)-(downstream/binSize)),

linetype = "dashed",

size = 1) +

labs(x = "",

y = SNPclassNamesPlot[x]) +

annotation_custom(legendLabs_ranFeat[[1]]) +

annotation_custom(legendLabs_ranFeat[[2]]) +

annotation_custom(legendLabs_ranFeat[[3]]) +

annotation_custom(legendLabs_ranFeat[[4]]) +

theme_bw() +

theme(

axis.ticks = element_line(size = 1.0, colour = "black"),

axis.ticks.length = unit(0.25, "cm"),

axis.text.x = element_text(size = 22, colour = "black"),

axis.text.y = element_text(size = 18, colour = "black", family = "Luxi Mono"),

axis.title = element_text(size = 30, colour = "black"),

legend.position = "none",

panel.grid = element_blank(),

panel.border = element_rect(size = 3.5, colour = "black"),

panel.background = element_blank(),

plot.margin = unit(c(0.3,1.2,0.0,0.3), "cm"),

plot.title = element_text(hjust = 1.0, size = 30)) +

ggtitle(bquote(.(ranFeatNamePlot) ~ "(" * italic("n") ~ "=" ~

.(prettyNum(summaryDFfeature$n[1],

big.mark = ",", trim = T)) *

")"))

}, mc.cores = length(SNPclassNamesPlot))

## ranLoc

ggObj3_combined_SNPclass <- mclapply(seq_along(SNPclassNamesPlot), function(x) {

summaryDFfeature <- summaryDFfeature_SNPclass[[x]][[3]]

ggplot(data = summaryDFfeature,

mapping = aes(x = winNo,

y = mean,

group = quantile)

) +

geom_line(data = summaryDFfeature,

mapping = aes(colour = quantile),

size = 1) +

scale_colour_manual(values = quantileColours) +

geom_ribbon(data = summaryDFfeature,

mapping = aes(ymin = CI_lower,

ymax = CI_upper,

fill = quantile),

alpha = 0.4) +

scale_fill_manual(values = quantileColours) +

scale_y_continuous(limits = c(ymin_list_SNPclass[[x]], ymax_list_SNPclass[[x]]),

labels = function(x) sprintf("%6.3f", x)) +

scale_x_discrete(breaks = c(1,

(upstream/binSize)+1,

(dim(summaryDFfeature_SNPclass[[x]][[3]])[1]/quantiles)-(downstream/binSize),

dim(summaryDFfeature_SNPclass[[x]][[3]])[1]/quantiles),

labels = c(paste0("-", flankName),

"Start",

"End",

paste0("+", flankName))) +

geom_vline(xintercept = c((upstream/binSize)+1,

(dim(summaryDFfeature_SNPclass[[x]][[3]])[1]/quantiles)-(downstream/binSize)),

linetype = "dashed",

size = 1) +

labs(x = "",

y = SNPclassNamesPlot[x]) +

annotation_custom(legendLabs_ranLoc[[1]]) +

annotation_custom(legendLabs_ranLoc[[2]]) +

annotation_custom(legendLabs_ranLoc[[3]]) +

annotation_custom(legendLabs_ranLoc[[4]]) +

theme_bw() +

theme(

axis.ticks = element_line(size = 1.0, colour = "black"),

axis.ticks.length = unit(0.25, "cm"),

axis.text.x = element_text(size = 22, colour = "black"),

axis.text.y = element_text(size = 18, colour = "black", family = "Luxi Mono"),

axis.title = element_text(size = 30, colour = "black"),

legend.position = "none",

panel.grid = element_blank(),

panel.border = element_rect(size = 3.5, colour = "black"),

panel.background = element_blank(),

plot.margin = unit(c(0.3,1.2,0.0,0.3), "cm"),

plot.title = element_text(hjust = 1.0, size = 30)) +

ggtitle(bquote(.(ranLocNamePlot) ~ "(" * italic("n") ~ "=" ~

.(prettyNum(summaryDFfeature$n[1],

big.mark = ",", trim = T)) *

")"))

}, mc.cores = length(SNPclassNamesPlot))

ggObjGA_combined <- grid.arrange(grobs = c(

ggObj1_combined_SNPclass,

ggObj2_combined_SNPclass,

ggObj3_combined_SNPclass

),

layout_matrix = cbind(

1:length(c(SNPclassNamesPlot)),

(length(c(SNPclassNamesPlot))+1):(length(c(SNPclassNamesPlot))*2),

((length(c(SNPclassNamesPlot))*2)+1):(length(c(SNPclassNamesPlot))*3)

))

ggsave(paste0(plotDir,

"1000exomesSNPclass_avgProfiles_around_", quantiles, "quantiles",

"_by_", orderingFactor,

"_of_", libName, "_peaks_in_",

paste0(featureName,

collapse = "_"), ".pdf"),

plot = ggObjGA_combined,

height = 6.5*length(c(SNPclassNamesPlot)), width = 21, limitsize = FALSE)

#### Free up memory by removing no longer required objects

rm(

SNPclass_featureMats, SNPclass_ranLocMats,

SNPclass_mats_quantiles,

wideDFfeature_list_SNPclass,

tidyDFfeature_list_SNPclass,

summaryDFfeature_list_SNPclass,

summaryDFfeature_SNPclass

)

gc()

#####

# TE superfams

superfamCodes <- c("RLG",

"RLC",

"RLX",

"RIX",

"SIX",

"DTC",

"DTM",

"DTX",

"DTH",

"DTT",

"DXX",

"DTA",

"DHH",

"XXX")

superfamNames <- c("Gypsy_LTR",

"Copia_LTR",

"Unclassified_LTR",

"LINE",

"SINE",

"CACTA",

"Mutator",

"Unclassified_with_TIRs",

"Harbinger",

"Mariner",

"Unclassified_class_2",

"hAT",

"Helitrons",

"Unclassified_repeats")

superfamNamesPlot <- c("Gypsy LTR",

"Copia LTR",

"Unclassified LTR",

"LINE",

"SINE",

"CACTA",

"Mutator",

"Unclassified with TIRs",

"Harbinger",

"Mariner",

"Unclassified class 2",

"hAT",

"Helitrons",

"Unclassified repeats")

# feature

superfam_featureMats <- mclapply(seq_along(superfamNames), function(x) {

lapply(seq_along(featureName), function(y) {

as.matrix(read.table(paste0("/home/ajt200/analysis/wheat/DMC1/snakemake_ChIPseq/mapped/DMC1peakProfiles/matrices/",

superfamNames[x], "_", superfamCodes[x],

"_around_", dirName, "_peaks_in_", featureName[y],

"_matrix_bin", binSize, "bp_flank", sub(" ", "", flankName), ".tab"),

header = T))

})

}, mc.cores = length(superfamNames))

# If features from multiple subgenomes and/or compartments are to be analysed,

# concatenate the corresponding feature coverage matrices

superfam_featureMats <- mclapply(seq_along(superfam_featureMats), function(x) {

if(length(featureName) > 1) {

do.call(rbind, superfam_featureMats[[x]])

} else {

superfam_featureMats[[x]][[1]]

}

}, mc.cores = length(superfam_featureMats))

# ranLoc

superfam_ranLocMats <- mclapply(seq_along(superfamNames), function(x) {

lapply(seq_along(featureName), function(y) {

as.matrix(read.table(paste0("/home/ajt200/analysis/wheat/DMC1/snakemake_ChIPseq/mapped/DMC1peakProfiles/matrices/",

superfamNames[x], "_", superfamCodes[x],

"_around_", dirName, "_peaks_in_", featureName[y],

"_ranLoc_matrix_bin", binSize, "bp_flank", sub(" ", "", flankName), ".tab"),

header = T))

})

}, mc.cores = length(superfamNames))

# If features from multiple subgenomes and/or compartments are to be analysed,

# concatenate the corresponding feature coverage matrices

superfam_ranLocMats <- mclapply(seq_along(superfam_ranLocMats), function(x) {

if(length(featureName) > 1) {

do.call(rbind, superfam_ranLocMats[[x]])

} else {

superfam_ranLocMats[[x]][[1]]

}

}, mc.cores = length(superfam_ranLocMats))

# Add column names

for(x in seq_along(superfam_featureMats)) {

colnames(superfam_featureMats[[x]]) <- c(paste0("u", 1:(upstream/binSize)),

paste0("t", ((upstream/binSize)+1):((upstream+bodyLength)/binSize)),

paste0("d", (((upstream+bodyLength)/binSize)+1):(((upstream+bodyLength)/binSize)+(downstream/binSize))))

colnames(superfam_ranLocMats[[x]]) <- c(paste0("u", 1:(upstream/binSize)),

paste0("t", ((upstream/binSize)+1):((upstream+bodyLength)/binSize)),

paste0("d", (((upstream+bodyLength)/binSize)+1):(((upstream+bodyLength)/binSize)+(downstream/binSize))))

}

# Subdivide coverage matrices into above-defined quantiles and random groupings

superfam_mats_quantiles <- mclapply(seq_along(superfam_featureMats), function(x) {

list(

# feature quantiles

lapply(1:quantiles, function(k) {

superfam_featureMats[[x]][quantileIndices[[k]],]

}),

# feature random groupings

lapply(1:quantiles, function(k) {

superfam_featureMats[[x]][randomPCIndices[[k]],]

}),

# random loci groupings

lapply(1:quantiles, function(k) {

superfam_ranLocMats[[x]][quantileIndices[[k]],]

})

)

}, mc.cores = length(superfam_featureMats))

# Transpose matrix and convert into dataframe

# in which first column is window name

wideDFfeature_list_superfam <- mclapply(seq_along(superfam_mats_quantiles), function(x) {

lapply(seq_along(superfam_mats_quantiles[[x]]), function(y) {

lapply(seq_along(superfam_mats_quantiles[[x]][[y]]), function(k) {

data.frame(window = colnames(superfam_mats_quantiles[[x]][[y]][[k]]),

t(superfam_mats_quantiles[[x]][[y]][[k]]))

})

})

}, mc.cores = length(superfam_mats_quantiles)/3)

# Convert into tidy data.frame (long format)

tidyDFfeature_list_superfam <- mclapply(seq_along(wideDFfeature_list_superfam), function(x) {

lapply(seq_along(superfam_mats_quantiles[[x]]), function(y) {

lapply(seq_along(superfam_mats_quantiles[[x]][[y]]), function(k) {

gather(data = wideDFfeature_list_superfam[[x]][[y]][[k]],

key = feature,

value = coverage,

-window)

})

})

}, mc.cores = length(wideDFfeature_list_superfam)/3)

# Order levels of factor "window" so that sequential levels

# correspond to sequential windows

for(x in seq_along(tidyDFfeature_list_superfam)) {

for(y in seq_along(superfam_mats_quantiles[[x]])) {

for(k in seq_along(superfam_mats_quantiles[[x]][[y]])) {

tidyDFfeature_list_superfam[[x]][[y]][[k]]$window <- factor(tidyDFfeature_list_superfam[[x]][[y]][[k]]$window,

levels = as.character(wideDFfeature_list_superfam[[x]][[y]][[k]]$window))

}

}

}

# Create summary data.frame in which each row corresponds to a window (Column 1),

# Column2 is the number of coverage values (features) per window,

# Column3 is the mean of coverage values per window,

# Column4 is the standard deviation of coverage values per window,

# Column5 is the standard error of the mean of coverage values per window,

# Column6 is the lower bound of the 95% confidence interval, and

# Column7 is the upper bound of the 95% confidence interval

summaryDFfeature_list_superfam <- mclapply(seq_along(tidyDFfeature_list_superfam), function(x) {

lapply(seq_along(superfam_mats_quantiles[[x]]), function(y) {

lapply(seq_along(superfam_mats_quantiles[[x]][[y]]), function(k) {

data.frame(window = as.character(wideDFfeature_list_superfam[[x]][[y]][[k]]$window),

n = tapply(X = tidyDFfeature_list_superfam[[x]][[y]][[k]]$coverage,

INDEX = tidyDFfeature_list_superfam[[x]][[y]][[k]]$window,

FUN = length),

mean = tapply(X = tidyDFfeature_list_superfam[[x]][[y]][[k]]$coverage,

INDEX = tidyDFfeature_list_superfam[[x]][[y]][[k]]$window,

FUN = mean,

na.rm = TRUE),

sd = tapply(X = tidyDFfeature_list_superfam[[x]][[y]][[k]]$coverage,

INDEX = tidyDFfeature_list_superfam[[x]][[y]][[k]]$window,

FUN = sd,

na.rm = TRUE))

})

})

}, mc.cores = length(tidyDFfeature_list_superfam)/3)

for(x in seq_along(summaryDFfeature_list_superfam)) {

for(y in seq_along(superfam_mats_quantiles[[x]])) {

for(k in seq_along(superfam_mats_quantiles[[x]][[y]])) {

summaryDFfeature_list_superfam[[x]][[y]][[k]]$window <- factor(summaryDFfeature_list_superfam[[x]][[y]][[k]]$window,

levels = as.character(wideDFfeature_list_superfam[[x]][[y]][[k]]$window))

summaryDFfeature_list_superfam[[x]][[y]][[k]]$winNo <- factor(1:dim(summaryDFfeature_list_superfam[[x]][[y]][[k]])[1])

summaryDFfeature_list_superfam[[x]][[y]][[k]]$sem <- summaryDFfeature_list_superfam[[x]][[y]][[k]]$sd/sqrt(summaryDFfeature_list_superfam[[x]][[y]][[k]]$n-1)

summaryDFfeature_list_superfam[[x]][[y]][[k]]$CI_lower <- summaryDFfeature_list_superfam[[x]][[y]][[k]]$mean -

qt(0.975, df = summaryDFfeature_list_superfam[[x]][[y]][[k]]$n-1)*summaryDFfeature_list_superfam[[x]][[y]][[k]]$sem

summaryDFfeature_list_superfam[[x]][[y]][[k]]$CI_upper <- summaryDFfeature_list_superfam[[x]][[y]][[k]]$mean +

qt(0.975, df = summaryDFfeature_list_superfam[[x]][[y]][[k]]$n-1)*summaryDFfeature_list_superfam[[x]][[y]][[k]]$sem

}

}

}

quantileNames <- paste0(rep("Quantile ", quantiles), 1:quantiles)

randomPCNames <- paste0(rep("Random ", quantiles), 1:quantiles)

for(x in seq_along(summaryDFfeature_list_superfam)) {

# feature quantiles

names(summaryDFfeature_list_superfam[[x]][[1]]) <- quantileNames

# feature random groupings

names(summaryDFfeature_list_superfam[[x]][[2]]) <- randomPCNames

# random loci groupings

names(summaryDFfeature_list_superfam[[x]][[3]]) <- randomPCNames

}

# Convert list of lists of lists of feature quantiles summaryDFfeature_list_superfam into

# a list of lists of single data.frames containing all feature quantiles for plotting

summaryDFfeature_superfam <- mclapply(seq_along(summaryDFfeature_list_superfam), function(x) {

lapply(seq_along(superfam_mats_quantiles[[x]]), function(y) {

bind_rows(summaryDFfeature_list_superfam[[x]][[y]], .id = "quantile")

})

}, mc.cores = length(summaryDFfeature_list_superfam))

for(x in seq_along(summaryDFfeature_superfam)) {

# feature quantiles

summaryDFfeature_superfam[[x]][[1]]$quantile <- factor(summaryDFfeature_superfam[[x]][[1]]$quantile,

levels = names(summaryDFfeature_list_superfam[[x]][[1]]))

# feature random groupings

summaryDFfeature_superfam[[x]][[2]]$quantile <- factor(summaryDFfeature_superfam[[x]][[2]]$quantile,

levels = names(summaryDFfeature_list_superfam[[x]][[2]]))

# random loci groupings

summaryDFfeature_superfam[[x]][[3]]$quantile <- factor(summaryDFfeature_superfam[[x]][[3]]$quantile,

levels = names(summaryDFfeature_list_superfam[[x]][[3]]))

}

# Define y-axis limits

ymin_list_superfam <- lapply(seq_along(summaryDFfeature_superfam), function(x) {

min(c(summaryDFfeature_superfam[[x]][[1]]$CI_lower,

summaryDFfeature_superfam[[x]][[2]]$CI_lower,

summaryDFfeature_superfam[[x]][[3]]$CI_lower))

})

ymax_list_superfam <- lapply(seq_along(summaryDFfeature_superfam), function(x) {

max(c(summaryDFfeature_superfam[[x]][[1]]$CI_upper,

summaryDFfeature_superfam[[x]][[2]]$CI_upper,

summaryDFfeature_superfam[[x]][[3]]$CI_upper))

})

# Define legend labels

legendLabs_feature <- lapply(seq_along(quantileNames), function(x) {

grobTree(textGrob(bquote(.(quantileNames[x])),

x = legendPos[1], y = legendPos[2]-((x-1)*0.06), just = "left",

gp = gpar(col = quantileColours[x], fontsize = 18)))

})

legendLabs_ranFeat <- lapply(seq_along(randomPCNames), function(x) {

grobTree(textGrob(bquote(.(randomPCNames[x])),

x = legendPos[1], y = legendPos[2]-((x-1)*0.06), just = "left",

gp = gpar(col = quantileColours[x], fontsize = 18)))

})

legendLabs_ranLoc <- lapply(seq_along(randomPCNames), function(x) {

grobTree(textGrob(bquote(.(randomPCNames[x])),

x = legendPos[1], y = legendPos[2]-((x-1)*0.06), just = "left",

gp = gpar(col = quantileColours[x], fontsize = 18)))

})

# Plot average profiles with 95% CI ribbon

## feature

ggObj1_combined_superfam <- mclapply(seq_along(superfamNamesPlot), function(x) {

summaryDFfeature <- summaryDFfeature_superfam[[x]][[1]]

ggplot(data = summaryDFfeature,

mapping = aes(x = winNo,

y = mean,

group = quantile)

) +

geom_line(data = summaryDFfeature,

mapping = aes(colour = quantile),

size = 1) +

scale_colour_manual(values = quantileColours) +

geom_ribbon(data = summaryDFfeature,

mapping = aes(ymin = CI_lower,

ymax = CI_upper,

fill = quantile),

alpha = 0.4) +

scale_fill_manual(values = quantileColours) +

scale_y_continuous(limits = c(ymin_list_superfam[[x]], ymax_list_superfam[[x]]),

labels = function(x) sprintf("%6.3f", x)) +

scale_x_discrete(breaks = c(1,

(upstream/binSize)+1,

(dim(summaryDFfeature_superfam[[x]][[1]])[1]/quantiles)-(downstream/binSize),

dim(summaryDFfeature_superfam[[x]][[1]])[1]/quantiles),

labels = c(paste0("-", flankName),

featureStartLab,

featureEndLab,

paste0("+", flankName))) +

geom_vline(xintercept = c((upstream/binSize)+1,

(dim(summaryDFfeature_superfam[[x]][[1]])[1]/quantiles)-(downstream/binSize)),

linetype = "dashed",

size = 1) +

labs(x = "",

y = superfamNamesPlot[x]) +

annotation_custom(legendLabs_feature[[1]]) +

annotation_custom(legendLabs_feature[[2]]) +

annotation_custom(legendLabs_feature[[3]]) +

annotation_custom(legendLabs_feature[[4]]) +

theme_bw() +

theme(

axis.ticks = element_line(size = 1.0, colour = "black"),

axis.ticks.length = unit(0.25, "cm"),

axis.text.x = element_text(size = 22, colour = "black"),

axis.text.y = element_text(size = 18, colour = "black", family = "Luxi Mono"),

axis.title = element_text(size = 30, colour = "black"),

legend.position = "none",

panel.grid = element_blank(),

panel.border = element_rect(size = 3.5, colour = "black"),

panel.background = element_blank(),

plot.margin = unit(c(0.3,1.2,0.0,0.3), "cm"),

plot.title = element_text(hjust = 1.0, size = 30)) +

ggtitle(bquote(.(featureNamePlot) ~ "(" * italic("n") ~ "=" ~

.(prettyNum(summaryDFfeature$n[1],

big.mark = ",", trim = T)) *

")"))

}, mc.cores = length(superfamNamesPlot))

## ranFeat

ggObj2_combined_superfam <- mclapply(seq_along(superfamNamesPlot), function(x) {

summaryDFfeature <- summaryDFfeature_superfam[[x]][[2]]

ggplot(data = summaryDFfeature,

mapping = aes(x = winNo,

y = mean,

group = quantile)

) +

geom_line(data = summaryDFfeature,

mapping = aes(colour = quantile),

size = 1) +

scale_colour_manual(values = quantileColours) +

geom_ribbon(data = summaryDFfeature,

mapping = aes(ymin = CI_lower,

ymax = CI_upper,

fill = quantile),

alpha = 0.4) +

scale_fill_manual(values = quantileColours) +

scale_y_continuous(limits = c(ymin_list_superfam[[x]], ymax_list_superfam[[x]]),

labels = function(x) sprintf("%6.3f", x)) +

scale_x_discrete(breaks = c(1,

(upstream/binSize)+1,

(dim(summaryDFfeature_superfam[[x]][[2]])[1]/quantiles)-(downstream/binSize),

dim(summaryDFfeature_superfam[[x]][[2]])[1]/quantiles),

labels = c(paste0("-", flankName),

featureStartLab,

featureEndLab,

paste0("+", flankName))) +

geom_vline(xintercept = c((upstream/binSize)+1,

(dim(summaryDFfeature_superfam[[x]][[2]])[1]/quantiles)-(downstream/binSize)),

linetype = "dashed",

size = 1) +

labs(x = "",

y = superfamNamesPlot[x]) +

annotation_custom(legendLabs_ranFeat[[1]]) +

annotation_custom(legendLabs_ranFeat[[2]]) +

annotation_custom(legendLabs_ranFeat[[3]]) +

annotation_custom(legendLabs_ranFeat[[4]]) +

theme_bw() +

theme(

axis.ticks = element_line(size = 1.0, colour = "black"),

axis.ticks.length = unit(0.25, "cm"),

axis.text.x = element_text(size = 22, colour = "black"),

axis.text.y = element_text(size = 18, colour = "black", family = "Luxi Mono"),

axis.title = element_text(size = 30, colour = "black"),

legend.position = "none",

panel.grid = element_blank(),

panel.border = element_rect(size = 3.5, colour = "black"),

panel.background = element_blank(),

plot.margin = unit(c(0.3,1.2,0.0,0.3), "cm"),

plot.title = element_text(hjust = 1.0, size = 30)) +

ggtitle(bquote(.(ranFeatNamePlot) ~ "(" * italic("n") ~ "=" ~

.(prettyNum(summaryDFfeature$n[1],

big.mark = ",", trim = T)) *

")"))

}, mc.cores = length(superfamNamesPlot))

## ranLoc

ggObj3_combined_superfam <- mclapply(seq_along(superfamNamesPlot), function(x) {

summaryDFfeature <- summaryDFfeature_superfam[[x]][[3]]

ggplot(data = summaryDFfeature,

mapping = aes(x = winNo,

y = mean,

group = quantile)

) +

geom_line(data = summaryDFfeature,

mapping = aes(colour = quantile),

size = 1) +

scale_colour_manual(values = quantileColours) +

geom_ribbon(data = summaryDFfeature,

mapping = aes(ymin = CI_lower,

ymax = CI_upper,

fill = quantile),

alpha = 0.4) +

scale_fill_manual(values = quantileColours) +

scale_y_continuous(limits = c(ymin_list_superfam[[x]], ymax_list_superfam[[x]]),

labels = function(x) sprintf("%6.3f", x)) +

scale_x_discrete(breaks = c(1,

(upstream/binSize)+1,

(dim(summaryDFfeature_superfam[[x]][[3]])[1]/quantiles)-(downstream/binSize),

dim(summaryDFfeature_superfam[[x]][[3]])[1]/quantiles),

labels = c(paste0("-", flankName),

"Start",

"End",

paste0("+", flankName))) +

geom_vline(xintercept = c((upstream/binSize)+1,

(dim(summaryDFfeature_superfam[[x]][[3]])[1]/quantiles)-(downstream/binSize)),

linetype = "dashed",

size = 1) +

labs(x = "",

y = superfamNamesPlot[x]) +

annotation_custom(legendLabs_ranLoc[[1]]) +

annotation_custom(legendLabs_ranLoc[[2]]) +

annotation_custom(legendLabs_ranLoc[[3]]) +

annotation_custom(legendLabs_ranLoc[[4]]) +

theme_bw() +

theme(

axis.ticks = element_line(size = 1.0, colour = "black"),

axis.ticks.length = unit(0.25, "cm"),

axis.text.x = element_text(size = 22, colour = "black"),

axis.text.y = element_text(size = 18, colour = "black", family = "Luxi Mono"),

axis.title = element_text(size = 30, colour = "black"),

legend.position = "none",

panel.grid = element_blank(),

panel.border = element_rect(size = 3.5, colour = "black"),

panel.background = element_blank(),

plot.margin = unit(c(0.3,1.2,0.0,0.3), "cm"),

plot.title = element_text(hjust = 1.0, size = 30)) +

ggtitle(bquote(.(ranLocNamePlot) ~ "(" * italic("n") ~ "=" ~

.(prettyNum(summaryDFfeature$n[1],

big.mark = ",", trim = T)) *

")"))

}, mc.cores = length(superfamNamesPlot))

ggObjGA_combined <- grid.arrange(grobs = c(

ggObj1_combined_superfam,

ggObj2_combined_superfam,

ggObj3_combined_superfam

),

layout_matrix = cbind(

1:length(c(superfamNamesPlot)),

(length(c(superfamNamesPlot))+1):(length(c(superfamNamesPlot))*2),

((length(c(superfamNamesPlot))*2)+1):(length(c(superfamNamesPlot))*3)

))

ggsave(paste0(plotDir,

"TEsuperfam_avgProfiles_around_", quantiles, "quantiles",

"_by_", orderingFactor,

"_of_", libName, "_peaks_in_",

paste0(featureName,

collapse = "_"), ".pdf"),

plot = ggObjGA_combined,

height = 6.5*length(c(superfamNamesPlot)), width = 21, limitsize = FALSE)

#### Free up memory by removing no longer required objects

rm(

superfam_featureMats, superfam_ranLocMats,

superfam_mats_quantiles,

wideDFfeature_list_superfam,

tidyDFfeature_list_superfam,

summaryDFfeature_list_superfam,

summaryDFfeature_superfam

)

gc()

#####

ggObjGA_combined <- grid.arrange(grobs = c(

ggObj1_combined_log2ChIP,

ggObj1_combined_other,

ggObj1_combined_DNAmeth,

ggObj1_combined_SNPclass,

ggObj1_combined_superfam,

ggObj2_combined_log2ChIP,

ggObj2_combined_other,

ggObj2_combined_DNAmeth,

ggObj2_combined_SNPclass,

ggObj2_combined_superfam,

ggObj3_combined_log2ChIP,

ggObj3_combined_other,

ggObj3_combined_DNAmeth,

ggObj3_combined_SNPclass,

ggObj3_combined_superfam

),

layout_matrix = cbind(

1:length(c(log2ChIPNamesPlot, otherNamesPlot, DNAmethNamesPlot, SNPclassNamesPlot, superfamNamesPlot)),

(length(c(log2ChIPNamesPlot, otherNamesPlot, DNAmethNamesPlot, SNPclassNamesPlot, superfamNamesPlot))+1):(length(c(log2ChIPNamesPlot, otherNamesPlot, DNAmethNamesPlot, SNPclassNamesPlot, superfamNamesPlot))*2),

((length(c(log2ChIPNamesPlot, otherNamesPlot, DNAmethNamesPlot, SNPclassNamesPlot, superfamNamesPlot))*2)+1):(length(c(log2ChIPNamesPlot, otherNamesPlot, DNAmethNamesPlot, SNPclassNamesPlot, superfamNamesPlot))*3)

))

ggsave(paste0(plotDir,

"combined_avgProfiles_around_", quantiles, "quantiles",

"_by_", orderingFactor,

"_of_", libName, "_peaks_in_",

paste0(featureName,

collapse = "_"), ".pdf"),

plot = ggObjGA_combined,

height = 6.5*length(c(log2ChIPNamesPlot, otherNamesPlot, DNAmethNamesPlot, SNPclassNamesPlot, superfamNamesPlot)), width = 21, limitsize = FALSE)

peak_cMMb_quantile_cMMb_density_mean_95CI_plot.R plots density and means with 95% CIs of recombination rate for each group of peaks.

Script: peak_cMMb_quantile_cMMb_density_mean_95CI_plot.R:

#!/applications/R/R-3.5.0/bin/Rscript

# Plot density and means with 95% confidence intervals (CIs)

# of recombination rate (cM/Mb) for each group of peaks

# Usage:

# /applications/R/R-3.5.0/bin/Rscript peak_cMMb_quantile_cMMb_density_mean_95CI_plot.R cMMb DMC1_Rep1_ChIP DMC1 'Agenome_euchromatin,Bgenome_euchromatin,Dgenome_euchromatin' 4

#orderingFactor <- "cMMb"

#libName <- "DMC1_Rep1_ChIP"

#dirName <- "DMC1"

#featureName <- unlist(strsplit("Agenome_euchromatin,Bgenome_euchromatin,Dgenome_euchromatin",

# split = ","))

#quantiles <- 4

args <- commandArgs(trailingOnly = T)

orderingFactor <- args[1]

libName <- args[2]

dirName <- args[3]

featureName <- unlist(strsplit(args[4],

split = ","))

quantiles <- as.numeric(args[5])

library(parallel)

library(tidyr)

library(dplyr)

library(ggplot2)

library(ggbeeswarm)

library(ggthemes)

library(grid)

library(gridExtra)

library(extrafont)

if(orderingFactor == "cMMb") {

outDir <- paste0("quantiles_by_", orderingFactor, "/")

} else {

outDir <- paste0("quantiles_by_log2_", orderingFactor,

"_control_in_", region, "/")

}

plotDir <- paste0(outDir, "plots/")

system(paste0("[ -d ", outDir, " ] || mkdir ", outDir))

system(paste0("[ -d ", plotDir, " ] || mkdir ", plotDir))

# Define plot titles

if(orderingFactor == "cMMb") {

featureNamePlot <- paste0("cM/Mb ",

gsub("_\\w+$", "", libName),

" peak quantiles")

}

ranFeatNamePlot <- paste0("Random ",

gsub("_\\w+$", "", libName),

" peak quantiles")

#ranLocNamePlot <- "Random locus quantiles"

# Define quantile colours

quantileColours <- c("red", "purple", "blue", "navy")

makeTransparent <- function(thisColour, alpha = 250)

{

newColour <- col2rgb(thisColour)

apply(newColour, 2, function(x) {

rgb(red = x[1], green = x[2], blue = x[3],

alpha = alpha, maxColorValue = 255)

})

}

quantileColours <- makeTransparent(quantileColours)

# Genomic definitions

chrs <- paste0(rep("chr", 21), rep(1:7, 3),

c(rep("A", 7), rep("B", 7), rep("D", 7)))

# Load table of features grouped into quantiles

# by decreasing cM/Mb

featuresDF <- read.table(paste0(outDir,

"features_", quantiles, "quantiles",

"_by_", orderingFactor,

"_of_", libName, "_peaks_in_",

paste0(featureName,

collapse = "_"), ".txt"),

header = T, sep = "\t", row.names = NULL, stringsAsFactors = F)

# Load features to confirm feature (row) ordering in "featuresDF" is the same

# as in "features" (which was used for generating the coverage matrices)

features <- lapply(seq_along(featureName), function(y) {

tmp <- read.table(paste0("/home/ajt200/analysis/wheat/", dirName,

"/snakemake_ChIPseq/mapped/both/peaks/PeakRanger1.18/ranger/p0.001_q0.01/",

libName,

"_rangerPeaksGRmergedOverlaps_minuslog10_p0.001_q0.01_noMinWidth_in_",

featureName[y], ".bed"),

header = F)

data.frame(tmp,

V7 = paste0(featureName[y], "_", tmp$V4),

stringsAsFactors = F)

})

# If features from multiple subgenomes and/or compartments are to be analysed,

# concatenate the corresponding feature data.frames

if(length(featureName) > 1) {

features <- do.call(rbind, features)

} else {

features <- features[[1]]

}

colnames(features) <- c("chr", "start", "end", "name", "score", "strand", "featureID")

stopifnot(identical(as.character(featuresDF$featureID),

as.character(features$featureID)))

rm(features); gc()

# Get row indices for each feature quantile

quantileIndices <- lapply(1:quantiles, function(k) {

which(featuresDF$quantile == paste0("Quantile ", k))

})

## Random feature quantiles

# Define function to randomly select n rows from

# a data.frame

selectRandomFeatures <- function(features, n) {

return(features[sample(x = dim(features)[1],

size = n,

replace = FALSE),])

}

# Define seed so that random selections are reproducible

set.seed(93750174)

#set.seed(453838430)

# Divide features into random sets of equal number,

# with the same number of genes per chromosome as

# above-defined orderingFactor-defined feature quantiles

randomPCIndices <- lapply(1:quantiles, function(k) {

randomPCIndicesk <- NULL

for(i in 1:length(chrs)) {

randomPCfeatureskChr <- selectRandomFeatures(features = featuresDF[featuresDF$seqnames == chrs[i],],

n = dim(featuresDF[featuresDF$quantile == paste0("Quantile ", k) &

featuresDF$seqnames == chrs[i],])[1])

randomPCIndicesk <- c(randomPCIndicesk, as.integer(rownames(randomPCfeatureskChr)))

}

randomPCIndicesk

})

# Confirm per-chromosome feature numbers are the same for quantiles and random groupings

lapply(seq_along(1:quantiles), function(k) {

sapply(seq_along(chrs), function(x) {

if(!identical(dim(featuresDF[randomPCIndices[[k]],][featuresDF[randomPCIndices[[k]],]$seqnames == chrs[x],]),

dim(featuresDF[quantileIndices[[k]],][featuresDF[quantileIndices[[k]],]$seqnames == chrs[x],]))) {

stop("Quantile features and random features do not consist of the same number of features per chromosome")

}

})

})

featuresDFtmp <- data.frame(featuresDF,

random = as.character(""),

stringsAsFactors = F)

ranFeatsDF <- data.frame()

for(k in 1:quantiles) {

featuresDFtmp[randomPCIndices[[k]],]$random <- paste0("Random ", k)

ranFeatsDFk <- featuresDFtmp[featuresDFtmp$random == paste0("Random ", k),]

ranFeatsDF <- rbind(ranFeatsDF, ranFeatsDFk)

}

# Calculate means, SDs, SEMs and 95% CIs

# and create dataframe of summary statistics for plotting

featuresDF_quantileMean <- sapply(1:quantiles, function(k) {

mean(featuresDF[featuresDF$quantile == paste0("Quantile ", k),]$cMMb, na.rm = T)

})

featuresDF_quantileSD <- sapply(1:quantiles, function(k) {

sd(featuresDF[featuresDF$quantile == paste0("Quantile ", k),]$cMMb, na.rm = T)

})

featuresDF_quantileSEM <- sapply(1:quantiles, function(k) {

featuresDF_quantileSD[k] / sqrt( (dim(featuresDF[featuresDF$quantile == paste0("Quantile ", k),])[1] - 1) )

})

featuresDF_quantileCIlower <- sapply(1:quantiles, function(k) {

featuresDF_quantileMean[k] -

( qt(0.975, df = dim(featuresDF[featuresDF$quantile == paste0("Quantile ", k),])[1]-1 ) *

featuresDF_quantileSEM[k] )

})

featuresDF_quantileCIupper <- sapply(1:quantiles, function(k) {

featuresDF_quantileMean[k] +

( qt(0.975, df = dim(featuresDF[featuresDF$quantile == paste0("Quantile ", k),])[1]-1 ) *

featuresDF_quantileSEM[k] )

})

featuresDF_summary_stats <- data.frame(quantile = paste0("Quantile ", 1:quantiles),

Mean = featuresDF_quantileMean,

SD = featuresDF_quantileSD,

SEM = featuresDF_quantileSEM,

CIlower = featuresDF_quantileCIlower,

CIupper = featuresDF_quantileCIupper,

stringsAsFactors = F)

ranFeatsDF_randomMean <- sapply(1:quantiles, function(k) {

mean(ranFeatsDF[ranFeatsDF$random == paste0("Random ", k),]$cMMb, na.rm = T)

})

ranFeatsDF_randomSD <- sapply(1:quantiles, function(k) {

sd(ranFeatsDF[ranFeatsDF$random == paste0("Random ", k),]$cMMb, na.rm = T)

})

ranFeatsDF_randomSEM <- sapply(1:quantiles, function(k) {

ranFeatsDF_randomSD[k] / sqrt( (dim(ranFeatsDF[ranFeatsDF$random == paste0("Random ", k),])[1] - 1) )

})

ranFeatsDF_randomCIlower <- sapply(1:quantiles, function(k) {

ranFeatsDF_randomMean[k] -

( qt(0.975, df = dim(ranFeatsDF[ranFeatsDF$random == paste0("Random ", k),])[1]-1 ) *

ranFeatsDF_randomSEM[k] )

})

ranFeatsDF_randomCIupper <- sapply(1:quantiles, function(k) {

ranFeatsDF_randomMean[k] +

( qt(0.975, df = dim(ranFeatsDF[ranFeatsDF$random == paste0("Random ", k),])[1]-1 ) *

ranFeatsDF_randomSEM[k] )

})

ranFeatsDF_summary_stats <- data.frame(random = paste0("Random ", 1:quantiles),

Mean = ranFeatsDF_randomMean,

SD = ranFeatsDF_randomSD,

SEM = ranFeatsDF_randomSEM,

CIlower = ranFeatsDF_randomCIlower,

CIupper = ranFeatsDF_randomCIupper,

stringsAsFactors = F)

summary_stats_min <- min(c(featuresDF_summary_stats$CIlower, ranFeatsDF_summary_stats$CIlower), na.rm = T)

summary_stats_max <- max(c(featuresDF_summary_stats$CIupper, ranFeatsDF_summary_stats$CIupper), na.rm = T)

# Take top 95% of data to aid visualisation in density plots

featuresDF <- featuresDF[which(featuresDF$cMMb <=

quantile(featuresDF$cMMb,

probs = 0.99, na.rm = T)),]

ranFeatsDF <- ranFeatsDF[which(ranFeatsDF$cMMb <=

quantile(ranFeatsDF$cMMb,

probs = 0.99, na.rm = T)),]

xmin <- min(c(

featuresDF[unlist(quantileIndices),]$cMMb,

featuresDF[unlist(randomPCIndices),]$cMMb

), na.rm = T)

xmax <- max(c(

featuresDF[unlist(quantileIndices),]$cMMb,

featuresDF[unlist(randomPCIndices),]$cMMb

), na.rm = T)

minDensity <- 0

maxDensity <- max(density(featuresDF[featuresDF$quantile == "Quantile 4",]$cMMb,

na.rm = T)$y)+0.04

maxDensity <- max(

c(

sapply(1:quantiles, function(k) {

max(c(max(density(featuresDF[featuresDF$quantile == paste0("Quantile ", k),]$cMMb,

na.rm = T)$y),

max(density(ranFeatsDF[ranFeatsDF$random == paste0("Random ", k),]$cMMb,

na.rm = T)$y)))

})

)

)+0.04

# Define legend labels

legendLabs_feature <- lapply(1:quantiles, function(x) {

grobTree(textGrob(bquote(.(paste0("Quantile ", 1:quantiles)[x])),

x = 0.65, y = 0.90-((x-1)*0.07), just = "left",

gp = gpar(col = quantileColours[x], fontsize = 22)))

})

legendLabs_ranFeat <- lapply(1:quantiles, function(x) {

grobTree(textGrob(bquote(.(paste0("Random ", 1:quantiles)[x])),

x = 0.65, y = 0.90-((x-1)*0.07), just = "left",

gp = gpar(col = quantileColours[x], fontsize = 22)))

})

# Recombination rate (cM/Mb) density plot function

cMMb_plotFun <- function(lociDF,

parameter,

parameterLab,

featureGroup,

featureNamePlot,

legendLabs,

quantileColours) {

ggplot(data = lociDF,

mapping = aes(x = get(parameter),

colour = reorder(x = get(featureGroup), X = desc(get(featureGroup))),

group = reorder(x = get(featureGroup), X = desc(get(featureGroup))))) +

scale_colour_manual(values = rev(quantileColours)) +

geom_density(size = 1.5) +

scale_x_continuous(limits = c(xmin, xmax),

labels = function(x) sprintf("%1.1f", x)) +

scale_y_continuous(limits = c(minDensity, maxDensity),

labels = function(x) sprintf("%1.1f", x)) +

labs(x = parameterLab,

y = "Density") +

annotation_custom(legendLabs[[1]]) +

annotation_custom(legendLabs[[2]]) +

annotation_custom(legendLabs[[3]]) +

annotation_custom(legendLabs[[4]]) +

theme_bw() +

theme(axis.line.y = element_line(size = 2.0, colour = "black"),

axis.line.x = element_line(size = 2.0, colour = "black"),

axis.ticks.y = element_line(size = 2.0, colour = "black"),

axis.ticks.x = element_line(size = 2.0, colour = "black"),

axis.ticks.length = unit(0.25, "cm"),

axis.text.y = element_text(size = 18, colour = "black", family = "Luxi Mono"),

axis.text.x = element_text(size = 18, colour = "black", family = "Luxi Mono"),

axis.title = element_text(size = 26, colour = "black"),

legend.position = "none",

## TEST WITH THIS WAY OF PLOTTING LEGEND LABELS TO CHECK THAT QUANTILES CORRESPOND TO EXPECTED COLOURS

# legend.position = c(0.8, 0.8),

# legend.text = element_text(size = 22, colour = "black"),

# legend.key.size = unit(1, "cm"),

# legend.title = element_blank(),

panel.grid = element_blank(),

panel.border = element_blank(),

panel.background = element_blank(),

plot.margin = unit(c(0.3,1.2,0.3,0.3),"cm"),

plot.title = element_text(hjust = 0.5, size = 30)) +

ggtitle(bquote(.(featureNamePlot)))

}

# Plot means and 95% confidence intervals

cMMb_meanCIs <- function(dataFrame,

parameterLab,

featureGroup,

featureNamePlot,

quantileColours) {

ggplot(data = dataFrame,

mapping = aes(x = get(featureGroup),

y = Mean,

colour = get(featureGroup))) +

labs(colour = "") +

geom_point(shape = 19, size = 6, position = position_dodge(width = 0.2)) +

geom_errorbar(mapping = aes(ymin = CIlower,

ymax = CIupper),

width = 0.2, size = 2, position = position_dodge(width = 0.2)) +

scale_colour_manual(values = quantileColours) +

scale_y_continuous(limits = c(summary_stats_min, summary_stats_max),

labels = function(x) sprintf("%1.2f", x)) +

# scale_x_discrete(breaks = as.vector(dataFrame$quantile),

# labels = as.vector(dataFrame$quantile)) +

labs(x = "",

y = parameterLab) +

theme_bw() +

theme(axis.line.y = element_line(size = 2.0, colour = "black"),

axis.ticks.y = element_line(size = 2.0, colour = "black"),

axis.ticks.x = element_blank(),

axis.ticks.length = unit(0.25, "cm"),

axis.text.y = element_text(size = 18, colour = "black", family = "Luxi Mono"),

axis.text.x = element_text(size = 22, colour = quantileColours, hjust = 1.0, vjust = 1.0, angle = 45),

axis.title = element_text(size = 26, colour = "black"),

legend.position = "none",

panel.grid = element_blank(),

panel.border = element_blank(),

panel.background = element_blank(),

plot.margin = unit(c(0.3,1.2,0.1,0.3),"cm"),

plot.title = element_text(hjust = 0.5, size = 30)) +

ggtitle(bquote(.(featureNamePlot)))

}

ggObjGA_feature <- cMMb_plotFun(lociDF = featuresDF,

parameter = "cMMb",

parameterLab = "Recombination rate (cM/Mb)",

featureGroup = "quantile",

featureNamePlot = featureNamePlot,

legendLabs = legendLabs_feature,

quantileColours = quantileColours

)

ggObjGA_ranFeat <- cMMb_plotFun(lociDF = ranFeatsDF,

parameter = "cMMb",

parameterLab = "Recombination rate (cM/Mb)",

featureGroup = "random",

featureNamePlot = ranFeatNamePlot,

legendLabs = legendLabs_ranFeat,

quantileColours = quantileColours

)

ggObjGA_feature_mean <- cMMb_meanCIs(dataFrame = featuresDF_summary_stats,

parameterLab = "Recombination rate (cM/Mb)",

featureGroup = "quantile",

featureNamePlot = featureNamePlot,

quantileColours = quantileColours

)

ggObjGA_ranFeat_mean <- cMMb_meanCIs(dataFrame = ranFeatsDF_summary_stats,

parameterLab = "Recombination rate (cM/Mb)",

featureGroup = "random",

featureNamePlot = ranFeatNamePlot,

quantileColours = quantileColours

)

ggObjGA_combined <- grid.arrange(ggObjGA_feature,

ggObjGA_feature_mean,

ggObjGA_ranFeat,

ggObjGA_ranFeat_mean,

ncol = 2, as.table = F)

ggsave(paste0(plotDir,

"cMMb_around_", quantiles, "quantiles",

"_by_", orderingFactor,

"_of_", libName, "_peaks_in_",

paste0(featureName,

collapse = "_"),

"_v050620.pdf"),

plot = ggObjGA_combined,

height = 13, width = 14)

**Gene analysis**

A Snakemake workflow for creating a matrix of windowed coverage values within genes and in flanking regions is provided below.

Additionally, R scripts are provided for creating a matrix of windowed SNP (1000exomes_SNP_profiles_around_genes_commandArgs.R) or transposable element (TE_superfamily_profiles_around_genes_commandArgs.R) frequency values within genes and in flanking regions.

Scripts for defining and evaluating groups of genes are also provided.

Requirements:

- Installation of Snakemake and optionally conda
- Snakefile in this repository. This contains "rules" that each execute a step in the workflow
- config.yaml in this repository. This contains customizable parameters including reference, which should be the reference genome file name without the .fa extension (e.g., wheat_v1.0)
- Optional: environment.yaml in scripts/read_alignment/snakemake_ChIPseq_MNaseseq/, used to create the software environment if conda is used
- If conda is not used, deepTools must be installed and specified in the PATH variable
- Coordinates for representative gene models from the IWGSC RefSeq v1.1 annotation and, separately, random loci in BED6 format: column 1 = chromosome ID; column 2 = 0-based start coordinates; column 3 = 1-based end coordinates; column 4 = sequential or otherwise unique numbers (this speeds up computation; see comment from dpryan79 on 13/09/2018 under GitHub issue computeMatrix has problem with multi processors #760]); column 5 = fill with NA; column 6 = strand
- A bigWig coverage file (generated using deepTools bamCoverage as part of the snakemake_ChIPseq_MNaseseq/ pipeline), to be used for calculating coverage profiles around genes and random loci (e.g., DMC1_Rep1_ChIP_MappedOn_wheat_v1.0_lowXM_both_sort_norm.bw)
- A variant call format (VCF) file containing ~3 million exome sequencing-derived SNP sites (all.GP08_mm75_het3_publication01142019.vcf), from He et al. (2019) Nat. Genet. **51**. DOI: 10.1038/s41588-019-0382-2. SNPs were annotated with their predicted impact on protein function using SnpEff v4.3t, after building a SnpEff database for the IWGSC RefSeq v1.0 Chinese Spring genome assembly with the IWGSC RefSeq v1.1 gene annotation
- Transposable elements (TEs) from the IWGSC RefSeq v1.0 annotation, with genomic coordinates for elements in each of 14 superfamilies in BED6 format, including strand information (one BED6-format file for each TE superfamily and for each set of randomly positioned loci)

Creating the conda environment:

conda env create --file environment.yaml --name ChIPseq_mapping

Usage:

In a Unix shell, navigate to the base directory containing Snakefile and config.yaml. Then run the following commands in the base directory (--cores should match the THREADS parameter in config.yaml):

conda activate ChIPseq_mapping

snakemake -p --cores 48

conda deactivate

Script: config.yaml:

THREADS: 32

SAMPLE: ["DMC1_Rep1_ChIP"]

FEATURES:

genomeRegionName: ["Agenome_genomewide",

"Bgenome_genomewide",

"Dgenome_genomewide"]

MAPPING:

mode: "both"

reference: "data/index/wheat_v1.0"

COVERAGE:

bodyLength: 3500

startLabel: "TSS"

endLabel: "TTS"

upstream: 2000

downstream: 2000

flankName: "2kb"

binSize: 20

binName: "20bp"

sortRegions: "keep"

Script: Snakefile:

# Snakemake workflow for creating a matrix of windowed

# coverage values for genomic features and flanking regions

# Usage ("--cores" should match the "THREADS" parameter in config.yaml, and reflect available threads):

# conda activate ChIPseq_mapping

# snakemake -p --cores 48

# conda deactivate

import os

# Specify config file parameters

configfile: "config.yaml"

sample = config["SAMPLE"]

genomeRegionName = config["FEATURES"]["genomeRegionName"]

reference = config["MAPPING"]["reference"]

refbase = os.path.basename(reference)

mode = config["MAPPING"]["mode"]

flankName = config["COVERAGE"]["flankName"]

binName = config["COVERAGE"]["binName"]

# Specify the desired end target file(s)

rule all:

input:

expand("matrices/{sample}_MappedOn_{refbase}_lowXM_{mode}_sort_norm_genes_in_{genomeRegionName}_matrix_bin{binName}_flank{flankName}.tab",

sample = sample,

refbase = refbase,

mode = mode,

genomeRegionName = genomeRegionName,

binName = binName,

flankName = flankName),

expand("matrices/{sample}_MappedOn_{refbase}_lowXM_{mode}_sort_norm_genes_in_{genomeRegionName}_ranLoc_matrix_bin{binName}_flank{flankName}.tab",

sample = sample,

refbase = refbase,

mode = mode,

genomeRegionName = genomeRegionName,

binName = binName,

flankName = flankName)

# Use computeMatrix function from deepTools to create a matrix of

# coverage values for genomic features and flanking regions, and

# for equivalent random loci and flanking regions

rule compute_matrix_genomeRegionFeatures:

"""Create matrices of coverage values for genomic features and random loci"""

input:

featuresFile = "/home/ajt200/analysis/wheat/annotation/221118_download/iwgsc_refseqv1.1_genes_2017July06/IWGSC_v1.1_HC_20170706_representative_mRNA_in_{genomeRegionName}.bed",

ranLocFile = "/home/ajt200/analysis/wheat/annotation/221118_download/iwgsc_refseqv1.1_genes_2017July06/IWGSC_v1.1_HC_20170706_representative_mRNA_in_{genomeRegionName}_randomLoci.bed",

BW = "../{mode}/bw/{sample}_MappedOn_{refbase}_lowXM_{mode}_sort_norm.bw"

output:

featuresGZ = "matrices/{sample}_MappedOn_{refbase}_lowXM_{mode}_sort_norm_genes_in_{genomeRegionName}_matrix_bin{binName}_flank{flankName}.gz",

featuresTAB = "matrices/{sample}_MappedOn_{refbase}_lowXM_{mode}_sort_norm_genes_in_{genomeRegionName}_matrix_bin{binName}_flank{flankName}.tab",

ranLocGZ = "matrices/{sample}_MappedOn_{refbase}_lowXM_{mode}_sort_norm_genes_in_{genomeRegionName}_ranLoc_matrix_bin{binName}_flank{flankName}.gz",

ranLocTAB = "matrices/{sample}_MappedOn_{refbase}_lowXM_{mode}_sort_norm_genes_in_{genomeRegionName}_ranLoc_matrix_bin{binName}_flank{flankName}.tab"

params:

bodyLength = config["COVERAGE"]["bodyLength"],

startLabel = config["COVERAGE"]["startLabel"],

endLabel = config["COVERAGE"]["endLabel"],

upstream = config["COVERAGE"]["upstream"],

downstream = config["COVERAGE"]["downstream"],

binSize = config["COVERAGE"]["binSize"],

sortRegions = config["COVERAGE"]["sortRegions"]

log:

features = "logs/computeMatrix/{sample}_MappedOn_{refbase}_lowXM_{mode}_sort_norm_genes_in_{genomeRegionName}_matrix_bin{binName}_flank{flankName}.log",

ranLoc = "logs/computeMatrix/{sample}_MappedOn_{refbase}_lowXM_{mode}_sort_norm_genes_in_{genomeRegionName}_ranLoc_matrix_bin{binName}_flank{flankName}.log"

threads:

config["THREADS"]

shell:

"(computeMatrix scale-regions"

" --regionsFileName {input.featuresFile}"

" --scoreFileName {input.BW}"

" --outFileName {output.featuresGZ}"

" --outFileNameMatrix {output.featuresTAB}"

" --regionBodyLength {params.bodyLength}"

" --startLabel {params.startLabel}"

" --endLabel {params.endLabel}"

" --upstream {params.upstream}"

" --downstream {params.downstream}"

" --binSize {params.binSize}"

" --sortRegions {params.sortRegions}"

" --numberOfProcessors {threads}) 2> {log.features}; "

"(computeMatrix scale-regions"

" --regionsFileName {input.ranLocFile}"

" --scoreFileName {input.BW}"

" --outFileName {output.ranLocGZ}"

" --outFileNameMatrix {output.ranLocTAB}"

" --regionBodyLength {params.bodyLength}"

" --startLabel {params.startLabel}"

" --endLabel {params.endLabel}"

" --upstream {params.upstream}"

" --downstream {params.downstream}"

" --binSize {params.binSize}"

" --sortRegions {params.sortRegions}"

" --numberOfProcessors {threads}) 2> {log.ranLoc}"

Script: 1000exomes_SNP_profiles_around_genes_commandArgs.R:

#!/applications/R/R-3.5.0/bin/Rscript

# Profile SNP frequency around genes and random loci

# Wheat subgenome compartments (a.k.a. partitions):

# 1. R1 and R3 (distal or "euchromatin")

# 2. R2a and R2b (interstitial)

# 3. C (proximal)

# 4. heterochromatin (interstitial and proximal)

# 5. centromeres (defined by IWGSC (2018) Science 361 using CENH3 ChIP-seq data from Guo et al. (2016) PLOS Genet. 12)

# Usage:

# /applications/R/R-3.5.0/bin/Rscript ./1000exomes_SNP_profiles_around_genes_commandArgs.R genes_in_Agenome genomewide 3500 2000 2kb 20

#featureName <- "genes_in_Agenome"

#region <- "genomewide"

#bodyLength <- 3500

#flankSize <- 2000

#flankName <- "2kb"

#winSize <- 20

args <- commandArgs(trailingOnly = T)

featureName <- args[1]

region <- args[2]

bodyLength <- as.numeric(args[3])

flankSize <- as.numeric(args[4])

flankName <- as.character(args[5])

winSize <- as.numeric(args[6])

library(EnrichedHeatmap)

library(parallel)

matDir <- paste0("matrices/")

system(paste0("[ -d ", matDir, " ] || mkdir ", matDir))

# Genomic definitions

chrs <- as.vector(read.table("wheat_v1.0.fa.sizes")[,1])

chrs <- chrs[-length(chrs)]

chrStart <- c(rep(1, times = length(chrs)))

chrLens <- as.vector(read.table("wheat_v1.0.fa.sizes")[,2])

chrLens <- chrLens[-length(chrLens)]

centromereStart <- as.vector(read.table(paste0("chromosome_compartments/",

"centromeres_outer_CENH3enriched_IWGSC_2018_Science_Table_S11_chr4ALeftmostInterval_chr5ARightTwoIntervals.txt"))[,2])

centromereEnd <- as.vector(read.table(paste0("chromosome_compartments/",

"centromeres_outer_CENH3enriched_IWGSC_2018_Science_Table_S11_chr4ALeftmostInterval_chr5ARightTwoIntervals.txt"))[,3])

chrPartitions <- read.table(paste0("chromosome_compartments/",

"chromosome_partitions_IWGSC_2018_Science_Table_S29.txt"),

header = TRUE)

genomeGR <- GRanges(seqnames = chrs,

ranges = IRanges(start = chrStart,

end = chrLens),

strand = "*")

genomeGR <- genomeGR[grep(substr(featureName, 10, 10),

seqnames(genomeGR))@values]

# Define region to be analysed

if(region == "euchromatin") {

regionGR <- GRanges(seqnames = rep(chrPartitions$chrom, 2),

ranges = IRanges(start = c(rep(1, dim(chrPartitions)[1]),

chrPartitions$R2b_R3),

end = c(chrPartitions$R1_R2a,

chrLens)),

strand = "*")

regionGR <- regionGR[grep(substr(featureName, 10, 10),

seqnames(regionGR))@values]

} else if(region == "interstitial") {

regionGR <- GRanges(seqnames = rep(chrPartitions$chrom, 2),

ranges = IRanges(start = c(chrPartitions$R1_R2a+1,

chrPartitions$C_R2b),

end = c(chrPartitions$R2a_C,

chrPartitions$R2b_R3-1)),

strand = "*")

regionGR <- regionGR[grep(substr(featureName, 10, 10),

seqnames(regionGR))@values]

} else if(region == "proximal") {

regionGR <- GRanges(seqnames = chrPartitions$chrom,

ranges = IRanges(start = chrPartitions$R2a_C+1,

end = chrPartitions$C_R2b-1),

strand = "*")

regionGR <- regionGR[grep(substr(featureName, 10, 10),

seqnames(regionGR))@values]

} else if(region == "heterochromatin") {

regionGR <- GRanges(seqnames = chrPartitions$chrom,

ranges = IRanges(start = chrPartitions$R1_R2a+1,

end = chrPartitions$R2b_R3-1),

strand = "*")

regionGR <- regionGR[grep(substr(featureName, 10, 10),

seqnames(regionGR))@values]

} else if(region == "centromeres") {

regionGR <- GRanges(seqnames = chrs,

ranges = IRanges(start = centromereStart,

end = centromereEnd),

strand = "*")

regionGR <- regionGR[grep(substr(featureName, 10, 10),

seqnames(regionGR))@values]

} else if(region == "genomewide") {

regionGR <- GRanges(seqnames = chrs,

ranges = IRanges(start = rep(1, length(chrs)),

end = chrLens),

strand = "*")

regionGR <- regionGR[grep(substr(featureName, 10, 10),

seqnames(regionGR))@values]

} else {

stop("region is not euchromatin, interstitial, proximal, heterochromatin, centromeres, or genomewide")

}

# Define region to be masked out of analysis

if(region == "euchromatin") {

maskGR <- GRanges(seqnames = chrPartitions$chrom,

ranges = IRanges(start = chrPartitions$R1_R2a+1,

end = chrPartitions$R2b_R3-1),

strand = "*")

maskGR <- maskGR[grep(substr(featureName, 10, 10),

seqnames(maskGR))@values]

} else if(region == "interstitial") {

maskGR <- GRanges(seqnames = rep(chrPartitions$chrom, 3),

ranges = IRanges(start = c(rep(1, dim(chrPartitions)[1]),

chrPartitions$R2a_C+1,

chrPartitions$R2b_R3),

end = c(chrPartitions$R1_R2a,

chrPartitions$C_R2b-1,

chrLens)),

strand = "*")

maskGR <- maskGR[grep(substr(featureName, 10, 10),

seqnames(maskGR))@values]

} else if(region == "proximal") {

maskGR <- GRanges(seqnames = rep(chrPartitions$chrom, 2),

ranges = IRanges(start = c(rep(1, dim(chrPartitions)[1]),

chrPartitions$C_R2b),

end = c(chrPartitions$R2a_C,

chrLens)),

strand = "*")

maskGR <- maskGR[grep(substr(featureName, 10, 10),

seqnames(maskGR))@values]

} else if(region == "heterochromatin") {

maskGR <- GRanges(seqnames = rep(chrPartitions$chrom, 2),

ranges = IRanges(start = c(rep(1, dim(chrPartitions)[1]),

chrPartitions$R2b_R3),

end = c(chrPartitions$R1_R2a,

chrLens)),

strand = "*")

maskGR <- maskGR[grep(substr(featureName, 10, 10),

seqnames(maskGR))@values]

} else if(region == "centromeres") {

maskGR <- GRanges(seqnames = rep(chrPartitions$chrom, 2),

ranges = IRanges(start = c(rep(1, dim(chrPartitions)[1]),

centromereEnd+1),

end = c(centromereStart-1,

chrLens)),

strand = "*")

maskGR <- maskGR[grep(substr(featureName, 10, 10),

seqnames(maskGR))@values]

} else if(region == "genomewide") {

maskGR <- GRanges()

maskGR <- maskGR[grep(substr(featureName, 10, 10),

seqnames(maskGR))@values]

} else {

stop("region is not euchromatin, interstitial, proximal, heterochromatin, centromeres, or genomewide")

}

# Load genes in BED format and convert into GRanges

# Note addition of 1 to 0-based BED start coordinates

genes <- read.table(paste0("/home/ajt200/analysis/wheat/annotation/221118_download/iwgsc_refseqv1.1_genes_2017July06/IWGSC_v1.1_HC_20170706_representative_mRNA_in_",

substring(featureName, first = 10, last = 16), "_", region, ".bed"),

header = F)

colnames(genes) <- c("chr", "start", "end", "name", "score", "strand")

genesGR <- GRanges(seqnames = genes$chr,

ranges = IRanges(start = genes$start+1,

end = genes$end),

strand = genes$strand,

number = genes$name)

genesGR <- genesGR[seqnames(genesGR) != "chrUn"]

# Subset to include only those not overlapping masked region

mask_genes_overlap <- findOverlaps(query = maskGR,

subject = genesGR,

type = "any",

select = "all",

ignore.strand = TRUE)

if(length(mask_genes_overlap) > 0) {

genesGR <- genesGR[-subjectHits(mask_genes_overlap)]

}

# Load ranLoc in BED format and convert into GRanges

# Note addition of 1 to 0-based BED start coordinates

ranLoc <- read.table(paste0("/home/ajt200/analysis/wheat/annotation/221118_download/iwgsc_refseqv1.1_genes_2017July06/IWGSC_v1.1_HC_20170706_representative_mRNA_in_",

substring(featureName, first = 10, last = 16), "_", region, "_randomLoci.bed"),

header = F)

colnames(ranLoc) <- c("chr", "start", "end", "name", "score", "strand")

ranLocGR <- GRanges(seqnames = ranLoc$chr,

ranges = IRanges(start = ranLoc$start+1,

end = ranLoc$end),

strand = ranLoc$strand,

number = ranLoc$name)

ranLocGR <- ranLocGR[seqnames(ranLocGR) != "chrUn"]

# Subset to include only those not overlapping masked region

mask_ranLoc_overlap <- findOverlaps(query = maskGR,

subject = ranLocGR,

type = "any",

select = "all",

ignore.strand = TRUE)

if(length(mask_ranLoc_overlap) > 0) {

ranLocGR <- ranLocGR[-subjectHits(mask_ranLoc_overlap)]

}

# Load exome sequencing-derived SNPs from He et al. (2019) Nat. Genet. 51. DOI: 10.1038/s41588-019-0382-2

# ~3 million SNP sites, available at: http://wheatgenomics.plantpath.ksu.edu/1000EC/

# SNPs were annotated with their predicted impact on protein function using SnpEff v4.3t,

# after building a SnpEff database for the IWGSC RefSeq v1.0 Chinese Spring genome assembly with the RefSeq v1.1 gene annotation.

SNPs <- read.table("all.GP08_mm75_het3_publication01142019.ann.vcf",

header = F, skip = 31,

colClasses = c(rep(NA, 2),

"NULL",

rep(NA, 2),

rep("NULL", 2),

NA))

# Add this line when working with complete VCF including per-accession genotype columns

# rep("NULL", 812)))

colnames(SNPs) <- c("chr", "pos", "ref", "alt", "info")

## all exome SNPs

SNPsGR <- GRanges(seqnames = SNPs$chr,

ranges = IRanges(start = SNPs$pos,

end = SNPs$pos),

strand = "*",

coverage = rep(1, dim(SNPs)[1]))

# Subset SNPs by class (grep-ing for "A" within VCF "info" field returns all SNPs)

SNPclass <- c(

"A",

"upstream_gene_variant",

"downstream_gene_variant",

"missense_variant",

"synonymous_variant",

"HIGH",

"MODERATE",

"LOW",

"MODIFIER",

"intron_variant",

"intergenic"

)

SNPsListGR <- mclapply(seq_along(SNPclass), function(x) {

classSNPs <- SNPs[grep(SNPclass[x], SNPs$info),]

GRanges(seqnames = classSNPs$chr,

ranges = IRanges(start = classSNPs$pos,

end = classSNPs$pos),

strand = "*",

coverage = rep(1, dim(classSNPs)[1]))

}, mc.cores = length(SNPclass))

## transition

SNPs_transition <- SNPs[(SNPs$ref == "A" | SNPs$ref == "G") & (SNPs$alt == "G" | SNPs$alt == "A") |

(SNPs$ref == "C" | SNPs$ref == "T") & (SNPs$alt == "T" | SNPs$alt == "C"),]

SNPs_transition_GR <- GRanges(seqnames = SNPs_transition$chr,

ranges = IRanges(start = SNPs_transition$pos,

end = SNPs_transition$pos),

strand = "*",

coverage = rep(1, dim(SNPs_transition)[1]))

## transversion

SNPs_transversion <- SNPs[(SNPs$ref == "A" | SNPs$ref == "G") & (SNPs$alt == "C" | SNPs$alt == "T") |

(SNPs$ref == "C" | SNPs$ref == "T") & (SNPs$alt == "A" | SNPs$alt == "G"),]

stopifnot((dim(SNPs_transition)[1] +

dim(SNPs_transversion)[1]) ==

dim(SNPs)[1])

SNPs_transversion_GR <- GRanges(seqnames = SNPs_transversion$chr,

ranges = IRanges(start = SNPs_transversion$pos,

end = SNPs_transversion$pos),

strand = "*",

coverage = rep(1, dim(SNPs_transversion)[1]))

# Add transitions and transversions GRanges to SNPsListGR

SNPsListGR <- c(SNPsListGR,

SNPs_transition_GR,

SNPs_transversion_GR)

SNPclassNames <- c(

"all",

"upstream_gene_variant",

"downstream_gene_variant",

"missense_variant",

"synonymous_variant",

"HIGH",

"MODERATE",

"LOW",

"MODIFIER",

"intron_variant",

"intergenic",

"transition",

"transversion"

)

# Define matrix and column mean outfiles

outDF <- lapply(seq_along(SNPclassNames), function(x) {

list(paste0(matDir, "exome_", SNPclassNames[x],

"_SNPs_around_", featureName, "_", region,

"_matrix_bin", winSize, "bp_flank", flankName, ".tab"),

paste0(matDir, "exome_", SNPclassNames[x],

"_SNPs_around_", featureName, "_", region,

"_ranLoc_matrix_bin", winSize, "bp_flank", flankName, ".tab"))

})

outDFcolMeans <- lapply(seq_along(SNPclassNames), function(x) {

list(paste0(matDir, "exome_", SNPclassNames[x],

"_SNPs_around_", featureName, "_", region,

"_matrix_bin", winSize, "bp_flank", flankName, "_colMeans.tab"),

paste0(matDir, "exome_", SNPclassNames[x],

"_SNPs_around_", featureName, "_", region,

"_ranLoc_matrix_bin", winSize, "bp_flank", flankName, "_colMeans.tab"))

})

# Function to create SNP frequency matrices for

# feature loci and random loci (incl. flanking regions)

# and to calculate mean profiles across all feature loci and random loci

covMatrix <- function(signal,

feature,

ranLoc,

featureSize,

flankSize,

winSize,

outDF,

outDFcolMeans) {

# feature loci

set.seed(2840)

feature_smoothed <- normalizeToMatrix(signal = signal,

target = feature,

value_column = "coverage",

extend = flankSize,

mean_mode = "w0",

w = winSize,

background = 0,

smooth = TRUE,

include_target = TRUE,

target_ratio = featureSize/(featureSize+(flankSize*2)))

print("feature_smoothed")

print(feature_smoothed)

print("feature_smoothed rows = ")

print(length(feature_smoothed)/round((featureSize/winSize)+((flankSize*2)/winSize)))

feature_smoothed_DF <- data.frame(feature_smoothed)

feature_smoothed_DF_colMeans <- as.vector(colMeans(feature_smoothed_DF,

na.rm = T))

write.table(feature_smoothed_DF,

file = outDF[[1]],

quote = F, sep = "\t", row.names = F, col.names = T)

write.table(feature_smoothed_DF_colMeans,

file = outDFcolMeans[[1]],

quote = F, sep = "\t", row.names = F, col.names = T)

# random loci

set.seed(8472)

ranLoc_smoothed <- normalizeToMatrix(signal = signal,

target = ranLoc,

value_column = "coverage",

extend = flankSize,

mean_mode = "w0",

w = winSize,

background = 0,

smooth = TRUE,

include_target = TRUE,

target_ratio = featureSize/(featureSize+(flankSize*2)))

print("ranLoc_smoothed")

print(ranLoc_smoothed)

print("ranLoc_smoothed rows = ")

print(length(ranLoc_smoothed)/round((featureSize/winSize)+((flankSize*2)/winSize)))

ranLoc_smoothed_DF <- data.frame(ranLoc_smoothed)

ranLoc_smoothed_DF_colMeans <- as.vector(colMeans(ranLoc_smoothed_DF,

na.rm = T))

write.table(ranLoc_smoothed_DF,

file = outDF[[2]],

quote = F, sep = "\t", row.names = F, col.names = T)

write.table(ranLoc_smoothed_DF_colMeans,

file = outDFcolMeans[[2]],

quote = F, sep = "\t", row.names = F, col.names = T)

}

# Run covMatrix() function on each feature GRanges object to obtain matrices

# containing normalised feature density values around target and random loci

mclapply(seq_along(SNPclassNames), function(x) {

covMatrix(signal = SNPsListGR[[x]],

feature = genesGR,

ranLoc = ranLocGR,

featureSize = bodyLength,

flankSize = flankSize,

winSize = winSize,

outDF = outDF[[x]],

outDFcolMeans = outDFcolMeans[[x]])

print(paste0("exome ", SNPclassNames[x],

" SNP frequency around ", featureName, " ", region,

" profile calculation complete"))

}, mc.cores = length(SNPclassNames))

Script: TE_superfamily_profiles_around_genes_commandArgs.R:

#!/applications/R/R-3.4.0/bin/Rscript

# Profile TE frequency around genes and random loci

# Usage:

# /applications/R/R-3.4.0/bin/Rscript ./TE_superfamily_profiles_around_genes_commandArgs.R genes_in_Agenome genomewide 3500 2000 2kb 20

#featureName <- "genes_in_Agenome"

#region <- "genomewide"

#bodyLength <- 3500

#flankSize <- 2000

#flankName <- "2kb"

#winSize <- 20

args <- commandArgs(trailingOnly = T)

featureName <- args[1]

region <- args[2]

bodyLength <- as.numeric(args[3])

flankSize <- as.numeric(args[4])

flankName <- as.character(args[5])

winSize <- as.numeric(args[6])

library(EnrichedHeatmap)

library(parallel)

matDir <- paste0("matrices/")

system(paste0("[ -d ", matDir, " ] || mkdir ", matDir))

# Genomic definitions

chrs <- as.vector(read.table("wheat_v1.0.fa.sizes")[,1])

chrs <- chrs[-length(chrs)]

chrStart <- c(rep(1, times = length(chrs)))

chrLens <- as.vector(read.table("wheat_v1.0.fa.sizes")[,2])

chrLens <- chrLens[-length(chrLens)]

centromereStart <- as.vector(read.table(paste0("chromosome_compartments/",

"centromeres_outer_CENH3enriched_IWGSC_2018_Science_Table_S11_chr4ALeftmostInterval_chr5ARightTwoIntervals.txt"))[,2])

centromereEnd <- as.vector(read.table(paste0("chromosome_compartments/",

"centromeres_outer_CENH3enriched_IWGSC_2018_Science_Table_S11_chr4ALeftmostInterval_chr5ARightTwoIntervals.txt"))[,3])

chrPartitions <- read.table(paste0("chromosome_compartments/",

"chromosome_partitions_IWGSC_2018_Science_Table_S29.txt"),

header = TRUE)

genomeGR <- GRanges(seqnames = chrs,

ranges = IRanges(start = chrStart,

end = chrLens),

strand = "*")

genomeGR <- genomeGR[grep(substr(featureName, 10, 10),

seqnames(genomeGR))@values]

# Define region to be analysed

if(region == "euchromatin") {

regionGR <- GRanges(seqnames = rep(chrPartitions$chrom, 2),

ranges = IRanges(start = c(rep(1, dim(chrPartitions)[1]),

chrPartitions$R2b_R3),

end = c(chrPartitions$R1_R2a,

chrLens)),

strand = "*")

} else if(region == "heterochromatin") {

regionGR <- GRanges(seqnames = chrPartitions$chrom,

ranges = IRanges(start = chrPartitions$R1_R2a+1,

end = chrPartitions$R2b_R3-1),

strand = "*")

} else if(region == "centromeres") {

regionGR <- GRanges(seqnames = chrs,

ranges = IRanges(start = centromereStart,

end = centromereEnd),

strand = "*")

} else if(region == "pericentromeres") {

regionGR <- GRanges(seqnames = chrPartitions$chrom,

ranges = IRanges(start = chrPartitions$R2a_C+1,

end = chrPartitions$C_R2b-1),

strand = "*")

} else if(region == "genomewide") {

regionGR <- GRanges(seqnames = chrs,

ranges = IRanges(start = rep(1, length(chrs)),

end = chrLens),

strand = "*")

} else {

stop("region is not euchromatin, heterochromatin, centromeres, pericentromeres, or genomewide")

}

# Define region to be masked out of analysis

if(region == "euchromatin") {

maskGR <- GRanges(seqnames = chrPartitions$chrom,

ranges = IRanges(start = chrPartitions$R1_R2a+1,

end = chrPartitions$R2b_R3-1),

strand = "*")

} else if(region == "heterochromatin") {

maskGR <- GRanges(seqnames = rep(chrPartitions$chrom, 2),

ranges = IRanges(start = c(rep(1, dim(chrPartitions)[1]),

chrPartitions$R2b_R3),

end = c(chrPartitions$R1_R2a,

chrLens)),

strand = "*")

} else if(region == "centromeres") {

maskGR <- GRanges(seqnames = rep(chrPartitions$chrom, 2),

ranges = IRanges(start = c(rep(1, dim(chrPartitions)[1]),

centromereEnd+1),

end = c(centromereStart-1,

chrLens)),

strand = "*")

} else if(region == "pericentromeres") {

maskGR <- GRanges(seqnames = rep(chrPartitions$chrom, 2),

ranges = IRanges(start = c(rep(1, dim(chrPartitions)[1]),

chrPartitions$C_R2b),

end = c(chrPartitions$R2a_C,

chrLens)),

strand = "*")

} else if(region == "genomewide") {

maskGR <- GRanges()

} else {

stop("region is not euchromatin, heterochromatin, centromeres, pericentromeres, or genomewide")

}

# Load genes in BED format and convert into GRanges

# Note addition of 1 to 0-based BED start coordinates

genes <- read.table(paste0("/home/ajt200/analysis/wheat/annotation/221118_download/iwgsc_refseqv1.1_genes_2017July06/IWGSC_v1.1_HC_20170706_representative_mRNA_in_",

substring(featureName, first = 10, last = 16), "_", region, ".bed"),

header = F)

colnames(genes) <- c("chr", "start", "end", "name", "score", "strand")

genesGR <- GRanges(seqnames = genes$chr,

ranges = IRanges(start = genes$start+1,

end = genes$end),

strand = genes$strand,

number = genes$name)

genesGR <- genesGR[seqnames(genesGR) != "chrUn"]

# Subset to include only those not overlapping masked region

mask_genes_overlap <- findOverlaps(query = maskGR,

subject = genesGR,

type = "any",

select = "all",

ignore.strand = TRUE)

if(length(mask_genes_overlap) > 0) {

genesGR <- genesGR[-subjectHits(mask_genes_overlap)]

}

# Load ranLoc in BED format and convert into GRanges

# Note addition of 1 to 0-based BED start coordinates

ranLoc <- read.table(paste0("/home/ajt200/analysis/wheat/annotation/221118_download/iwgsc_refseqv1.1_genes_2017July06/IWGSC_v1.1_HC_20170706_representative_mRNA_in_",

substring(featureName, first = 10, last = 16), "_", region, "_randomLoci.bed"),

header = F)

colnames(ranLoc) <- c("chr", "start", "end", "name", "score", "strand")

ranLocGR <- GRanges(seqnames = ranLoc$chr,

ranges = IRanges(start = ranLoc$start+1,

end = ranLoc$end),

strand = ranLoc$strand,

number = ranLoc$name)

ranLocGR <- ranLocGR[seqnames(ranLocGR) != "chrUn"]

# Subset to include only those not overlapping masked region

mask_ranLoc_overlap <- findOverlaps(query = maskGR,

subject = ranLocGR,

type = "any",

select = "all",

ignore.strand = TRUE)

if(length(mask_ranLoc_overlap) > 0) {

ranLocGR <- ranLocGR[-subjectHits(mask_ranLoc_overlap)]

}

# Load TE superfamily BED files

inDirSuperfams <- "/home/ajt200/analysis/wheat/featureProfiles/TEs/superfamilies/"

superfamCode <- c("RLG",

"RLC",

"RLX",

"RIX",

"SIX",

"DTC",

"DTM",

"DTX",

"DTH",

"DMI",

"DTT",

"DXX",

"DTA",

"DHH",

"XXX")

superfamName <- c("Gypsy_LTR",

"Copia_LTR",

"Unclassified_LTR",

"LINE",

"SINE",

"CACTA",

"Mutator",

"Unclassified_with_TIRs",

"Harbinger",

"MITE",

"Mariner",

"Unclassified_class_2",

"hAT",

"Helitrons",

"Unclassified_repeats")

superfamListGR <- mclapply(seq_along(superfamName), function(x) {

superfam <- read.table(paste0(inDirSuperfams,

"iwgsc_refseqv1.0_TransposableElements_2017Mar13_superfamily_",

superfamName[x], "_", superfamCode[x], ".bed"),

header = F)

colnames(superfam) <- c("chr", "start", "end", "name", "score", "strand")

superfamGR <- GRanges(seqnames = superfam$chr,

ranges = IRanges(start = superfam$start+1,

end = superfam$end),

strand = "*",

number = superfam$name,

coverage = rep(1, dim(superfam)[1]))

superfamGR <- superfamGR[seqnames(superfamGR) != "chrUn"]

# Subset to include only those not overlapping masked region

mask_superfam_overlap <- findOverlaps(query = maskGR,

subject = superfamGR,

type = "any",

select = "all",

ignore.strand = TRUE)

if(length(mask_superfam_overlap) > 0) {

superfamGR <- superfamGR[-subjectHits(mask_superfam_overlap)]

}

superfamGR

}, mc.cores = length(superfamName))

# Define matrix and column mean outfiles

outDF <- lapply(seq_along(superfamName), function(x) {

list(paste0(matDir, superfamName[x], "_", superfamCode[x],

"_around_", featureName, "_", region,

"_matrix_bin", winSize, "bp_flank", flankName, ".tab"),

paste0(matDir, superfamName[x], "_", superfamCode[x],

"_around_", featureName, "_", region,

"_ranLoc_matrix_bin", winSize, "bp_flank", flankName, ".tab"))

})

outDFcolMeans <- lapply(seq_along(superfamName), function(x) {

list(paste0(matDir, superfamName[x], "_", superfamCode[x],

"_around_", featureName, "_", region,

"_matrix_bin", winSize, "bp_flank", flankName, "_colMeans.tab"),

paste0(matDir, superfamName[x], "_", superfamCode[x],

"_around_", featureName, "_", region,

"_ranLoc_matrix_bin", winSize, "bp_flank", flankName, "_colMeans.tab"))

})

# Function to create TE frequency matrices for

# feature loci and random loci (incl. flanking regions)

# and to calculate mean profiles across all feature loci and random loci

covMatrix <- function(signal,

feature,

ranLoc,

featureSize,

flankSize,

winSize,

outDF,

outDFcolMeans) {

# feature loci

set.seed(2840)

feature_smoothed <- normalizeToMatrix(signal = signal,

target = feature,

value_column = "coverage",

extend = flankSize,

mean_mode = "w0",

w = winSize,

background = 0,

smooth = TRUE,

include_target = TRUE,

target_ratio = featureSize/(featureSize+(flankSize*2)))

print("feature_smoothed")

print(feature_smoothed)

print("feature_smoothed rows = ")

print(length(feature_smoothed)/round((featureSize/winSize)+((flankSize*2)/winSize)))

feature_smoothed_DF <- data.frame(feature_smoothed)

feature_smoothed_DF_colMeans <- as.vector(colMeans(feature_smoothed_DF,

na.rm = T))

write.table(feature_smoothed_DF,

file = outDF[[1]],

quote = F, sep = "\t", row.names = F, col.names = T)

write.table(feature_smoothed_DF_colMeans,

file = outDFcolMeans[[1]],

quote = F, sep = "\t", row.names = F, col.names = T)

# random loci

set.seed(8472)

ranLoc_smoothed <- normalizeToMatrix(signal = signal,

target = ranLoc,

value_column = "coverage",

extend = flankSize,

mean_mode = "w0",

w = winSize,

background = 0,

smooth = TRUE,

include_target = TRUE,

target_ratio = featureSize/(featureSize+(flankSize*2)))

print("ranLoc_smoothed")

print(ranLoc_smoothed)

print("ranLoc_smoothed rows = ")

print(length(ranLoc_smoothed)/round((featureSize/winSize)+((flankSize*2)/winSize)))

ranLoc_smoothed_DF <- data.frame(ranLoc_smoothed)

ranLoc_smoothed_DF_colMeans <- as.vector(colMeans(ranLoc_smoothed_DF,

na.rm = T))

write.table(ranLoc_smoothed_DF,

file = outDF[[2]],

quote = F, sep = "\t", row.names = F, col.names = T)

write.table(ranLoc_smoothed_DF_colMeans,

file = outDFcolMeans[[2]],

quote = F, sep = "\t", row.names = F, col.names = T)

}

# Run covMatrix() function on each feature GRanges object to obtain matrices

# containing normalised feature density values around target and random loci

mclapply(seq_along(superfamName), function(x) {

covMatrix(signal = superfamListGR[[x]],

feature = genesGR,

ranLoc = ranLocGR,

featureSize = bodyLength,

flankSize = flankSize,

winSize = winSize,

outDF = outDF[[x]],

outDFcolMeans = outDFcolMeans[[x]])

print(paste0(superfamName[x], "_", superfamCode[x],

"_around_", featureName, "_", region,

" profile calculation complete"))

}, mc.cores = length(superfamName))

The R script group_genes_into_quantiles_and_popgenetics.R was used to divide genes into groups corresponding to those in given percentile ranges (e.g., 100th–75th (Quantile 1), 75th–50th (Quantile 2), 50th–25th (Quantile 3) and 25th–0th (Quantile 4)) with regard to various ordering factors, such as mean crossover recombination rate (cM/Mb) values, derived from a Chinese Spring × Renan genetic map, ChIP-seq signal, or population genetics statistics. This script extends gene boundaries by 1 kb on each side, and computes mean cM/Mb values within these intervals using previously calculated mean recombination rates in 10-Mb sliding windows with a 1-Mb step (iwgsc_refseqv1.0_recombination_rate.txt, available as part of the IWGSC RefSeq v1.0 annotation). group_genes_into_quantiles_and_popgenetics.R requires coordinates for representative gene models from the IWGSC RefSeq v1.1 annotation and, separately, random loci in BED6 format: column 1 = chromosome ID; column 2 = 0-based start coordinates; column 3 = 1-based end coordinates; column 4 = sequential or otherwise unique numbers; column 5 = fill with NA; column 6 = strand. To compute population genetics statistics for each gene, this script also requires a variant call format (VCF) file containing ~3 million exome sequencing-derived SNP sites (all.GP08_mm75_het3_publication01142019.vcf.gz), with geographical information about each accession obtained from He et al. (2019) Nat. Genet. **51**. DOI: 10.1038/s41588-019-0382-2.

Script: group_genes_into_quantiles_and_popgenetics.R:

#!/applications/R/R-3.5.0/bin/Rscript

# Calculate population genetics statistics,

# mean recombination rate (cM/Mb) and mean coverage values for each gene.

# Use these values as ordering factors for dividing genes

# into groups corresponding to genes in given

# percentile ranges with regard to these values.

# Usage:

# /applications/R/R-3.5.0/bin/Rscript group_genes_into_quantiles_and_popgenetics.R 'genes_in_Agenome_genomewide,genes_in_Bgenome_genomewide,genes_in_Dgenome_genomewide' genes

#featureName <- unlist(strsplit("genes_in_Agenome_genomewide,genes_in_Bgenome_genomewide,genes_in_Dgenome_genomewide",

# split = ","))

#region <- "genes"

args <- commandArgs(trailingOnly = T)

featureName <- unlist(strsplit(args[1],

split = ","))

region <- args[2]

library(PopGenome)

library(WhopGenome)

library(data.table)

library(GenomicRanges)

library(dplyr)

library(parallel)

library(doParallel)

registerDoParallel(cores = detectCores())

print("Currently registered parallel backend name, version and cores")

print(getDoParName())

print(getDoParVersion())

print(getDoParWorkers())

# Load features

features <- lapply(seq_along(featureName), function(x) {

read.table(paste0("/home/ajt200/analysis/wheat/annotation/221118_download/iwgsc_refseqv1.1_genes_2017July06/IWGSC_v1.1_HC_20170706_representative_mRNA_in_",

paste0(substring(featureName[x], first = 10, last = 16),

collapse = "_"), "_",

substring(featureName[1][1], first = 18), ".gff3"),

header = F)

})

# If features from all 3 subgenomes are to be analysed,

# concatenate the 3 corresponding feature data.frames

if(length(featureName) == 3) {

features <- do.call(rbind, features)

} else {

features <- features[[1]]

}

featureIDs <- sub(pattern = "\\.\\d+", replacement = "",

features$V9)

inDir <- "/home/ajt200/analysis/wheat/annotation/221118_download/He_Akhunov_2019_NatGenet_1000exomes_SNPs/"

# Load 811 exomes-derived SNP matrix from He et al. (2019) Nat. Genet. 51. DOI: 10.1038/s41588-019-0382-2

# ~3 million SNP sites, available at: http://wheatgenomics.plantpath.ksu.edu/1000EC/

if(!(file.exists(paste0(inDir, "all.GP08_mm75_het3_publication01142019.vcf.gz.tbi")))) {

tabix_build(paste0(inDir, "all.GP08_mm75_het3_publication01142019.vcf.gz"),

sc = as.integer(1), bc = as.integer(2), ec = as.integer(2), meta = "#", lineskip = as.integer(0))

} else {

print("*.vcf.gz.tbi index file exists")

}

vcf_handle <- vcf_open(paste0(inDir, "all.GP08_mm75_het3_publication01142019.vcf.gz"))

chrs <- paste0(rep("chr", 21), rep(1:7, 3),

c(rep("A", 7), rep("B", 7), rep("D", 7)))

# This works with lapply, but fails with mclapply for some reason

genomeClass_list <- lapply(seq_along(chrs), function(x) {

print(x)

Whop_readVCF(v = vcf_handle,

numcols = 1000,

tid = chrs[x],

frompos = 1,

topos = 1000000000,

samplenames = NA,

gffpath = "/home/ajt200/analysis/wheat/annotation/221118_download/iwgsc_refseqv1.1_genes_2017July06/IWGSC_v1.1_HC_20170706.gff3",

include.unknown = T)

})

# Specify populations based on regional groupings of accessions

pop_name <- c(

"Africa",

"MiddleEast",

"Asia",

"FormerSU",

"EasternEurope",

"WesternEurope",

"NorthAmerica",

"CentralAmerica",

"SouthAmerica",

"Oceania"

)

pop_list <- lapply(seq_along(pop_name), function(x) {

as.character(read.table(paste0(inDir, pop_name[x], "_accessions.txt"))[[1]])

})

genomeClass_list <- lapply(seq_along(genomeClass_list), function(x) {

set.populations(genomeClass_list[[x]],

pop_list, diploid = T)

})

# Assign to new object as mclapply may misbehave otherwise

print("set.synnonsyn")

genomeClass_list_syn <- mclapply(seq_along(genomeClass_list), function(x) {

set.synnonsyn(genomeClass_list[[x]],

ref.chr = paste0("/home/ajt200/analysis/wheat/wheat_IWGSC_WGA_v1.0_pseudomolecules/", chrs[x], ".fa"),

save.codons = F)

}, mc.cores = length(genomeClass_list), mc.preschedule = F)

# Extact variants located within features

print("splitting.data")

genomeClassSplit_list <- mclapply(seq_along(genomeClass_list_syn), function(x) {

splitting.data(genomeClass_list_syn[[x]],

positions = lapply(which(features$V1 == chrs[x]), function(x) {

features[x,]$V4:features[x,]$V5 }),

type = 2)

}, mc.cores = length(genomeClass_list_syn), mc.preschedule = F)

# Get neutrality, diversity, F_ST (fixation index), site frequency spectrum (SFS),

# composite-likelihood-ratio (CLR) test, and linkage disequilibrium statistics

print("neutrality")

genomeClassSplit_list_all <- mclapply(seq_along(genomeClassSplit_list), function(x) {

neutrality.stats(genomeClassSplit_list[[x]],

FAST = F, do.R2 = T)

}, mc.cores = length(genomeClassSplit_list), mc.preschedule = F)

genomeClassSplit_list_syn <- mclapply(seq_along(genomeClassSplit_list), function(x) {

neutrality.stats(genomeClassSplit_list[[x]],

FAST = F, do.R2 = T, subsites = "syn")

}, mc.cores = length(genomeClassSplit_list), mc.preschedule = F)

genomeClassSplit_list_nonsyn <- mclapply(seq_along(genomeClassSplit_list), function(x) {

neutrality.stats(genomeClassSplit_list[[x]],

FAST = F, do.R2 = T, subsites = "nonsyn")

}, mc.cores = length(genomeClassSplit_list), mc.preschedule = F)

## Below will extract stats for first population only

#neutrality_stats_df_list <- lapply(seq_along(genomeClassSplit_list), function(x) {

# data.frame(get.neutrality(genomeClassSplit_list[[x]],

# theta = T)[[1]],

# stringsAsFactors = F)

#})

print("F_ST")

genomeClassSplit_list_all2 <- mclapply(seq_along(genomeClassSplit_list_all), function(x) {

F_ST.stats(genomeClassSplit_list_all[[x]],

detail = T, mode = "nucleotide", FAST = F)

}, mc.cores = length(genomeClassSplit_list_all), mc.preschedule = F)

genomeClassSplit_list_syn2 <- mclapply(seq_along(genomeClassSplit_list_syn), function(x) {

F_ST.stats(genomeClassSplit_list_syn[[x]],

detail = T, mode = "nucleotide", FAST = F, subsites = "syn")

}, mc.cores = length(genomeClassSplit_list_syn), mc.preschedule = F)

genomeClassSplit_list_nonsyn2 <- mclapply(seq_along(genomeClassSplit_list_nonsyn), function(x) {

F_ST.stats(genomeClassSplit_list_nonsyn[[x]],

detail = T, mode = "nucleotide", FAST = F, subsites = "nonsyn")

}, mc.cores = length(genomeClassSplit_list_nonsyn), mc.preschedule = F)

## Below will extract stats for first population only

#F_ST_stats_df_list <- lapply(seq_along(genomeClassSplit_list), function(x) {

# data.frame(get.F_ST(genomeClassSplit_list[[x]],

# mode = "nucleotide"),

# stringsAsFactors = F)

#})

genomeClassSplit_list_all <- genomeClassSplit_list_all2

genomeClassSplit_list_syn <- genomeClassSplit_list_syn2

genomeClassSplit_list_nonsyn <- genomeClassSplit_list_nonsyn2

rm(genomeClassSplit_list_all2, genomeClassSplit_list_syn2, genomeClassSplit_list_nonsyn2); gc()

# diversity.stats function generates error when applied to genomeClassSplit_list

# consisting of multiple populations with "keep.site.info = T":

# "Error in `rownames<-`(`*tmp*`, value = nam) :

# attempt to set 'rownames' on an object with no dimensions"

# However, most diversity stats (but not Pi from Nei) are

# available after running F_ST.stats

# If Pi from Nei is needed, run diversity.stats with "keep.site.info = F"

# (HOWEVER: Pi shouldn't be used when "include.unknown = T"

# is specified in Whop_readVCF function call, as above)

print("diversity")

genomeClassSplit_list_all2 <- mclapply(seq_along(genomeClassSplit_list_all), function(x) {

diversity.stats(genomeClassSplit_list_all[[x]],

pi = T, keep.site.info = F)

}, mc.cores = length(genomeClassSplit_list_all), mc.preschedule = F)

genomeClassSplit_list_syn2 <- mclapply(seq_along(genomeClassSplit_list_syn), function(x) {

diversity.stats(genomeClassSplit_list_syn[[x]],

pi = T, keep.site.info = F, subsites = "syn")

}, mc.cores = length(genomeClassSplit_list_syn), mc.preschedule = F)

genomeClassSplit_list_nonsyn2 <- mclapply(seq_along(genomeClassSplit_list_nonsyn), function(x) {

diversity.stats(genomeClassSplit_list_nonsyn[[x]],

pi = T, keep.site.info = F, subsites = "nonsyn")

}, mc.cores = length(genomeClassSplit_list_nonsyn), mc.preschedule = F)

## Below will extract stats for first population only

#diversity_stats_df_list <- lapply(seq_along(genomeClassSplit_list), function(x) {

# data.frame(get.diversity(genomeClassSplit_list[[x]],

# between = F)[[1]],

# stringsAsFactors = F)

#})

genomeClassSplit_list_all <- genomeClassSplit_list_all2

genomeClassSplit_list_syn <- genomeClassSplit_list_syn2

genomeClassSplit_list_nonsyn <- genomeClassSplit_list_nonsyn2

rm(genomeClassSplit_list_all2, genomeClassSplit_list_syn2, genomeClassSplit_list_nonsyn2); gc()

# Get site frequency spectrum (SFS) for each site

print("detail (SFS)")

genomeClassSplit_list_all2 <- mclapply(seq_along(genomeClassSplit_list_all), function(x) {

detail.stats(genomeClassSplit_list_all[[x]],

site.spectrum = T)

}, mc.cores = length(genomeClassSplit_list_all), mc.preschedule = F)

genomeClassSplit_list_syn2 <- mclapply(seq_along(genomeClassSplit_list_syn), function(x) {

detail.stats(genomeClassSplit_list_syn[[x]],

site.spectrum = T, subsites = "syn")

}, mc.cores = length(genomeClassSplit_list_syn), mc.preschedule = F)

genomeClassSplit_list_nonsyn2 <- mclapply(seq_along(genomeClassSplit_list_nonsyn), function(x) {

detail.stats(genomeClassSplit_list_nonsyn[[x]],

site.spectrum = T, subsites = "nonsyn")

}, mc.cores = length(genomeClassSplit_list_nonsyn), mc.preschedule = F)

genomeClassSplit_list_all <- genomeClassSplit_list_all2

genomeClassSplit_list_syn <- genomeClassSplit_list_syn2

genomeClassSplit_list_nonsyn <- genomeClassSplit_list_nonsyn2

rm(genomeClassSplit_list_all2, genomeClassSplit_list_syn2, genomeClassSplit_list_nonsyn2); gc()

# Calculate mean SFS for each gene in each population

# all

SFS_means_list_all <- mclapply(seq_along(genomeClassSplit_list_all), function(x) {

SFS_pop_mat <- NULL

for(p in 1:length(pop_name)) {

SFS_pop <- sapply(genomeClassSplit_list_all[[x]]@region.stats@minor.allele.freqs, function(y) {

if(length(y) == 0) {

return(NA)

} else {

return(mean(y[p,], na.rm = T))

}

})

SFS_pop_mat <- cbind(SFS_pop_mat, SFS_pop)

}

colnames(SFS_pop_mat) <- paste0("pop ", 1:length(pop_name))

return(SFS_pop_mat)

}, mc.cores = length(genomeClassSplit_list_all), mc.preschedule = F)

# syn

SFS_means_list_syn <- mclapply(seq_along(genomeClassSplit_list_syn), function(x) {

SFS_pop_mat <- NULL

for(p in 1:length(pop_name)) {

SFS_pop <- sapply(genomeClassSplit_list_syn[[x]]@region.stats@minor.allele.freqs, function(y) {

if(length(y) == 0) {

return(NA)

} else {

return(mean(y[p,], na.rm = T))

}

})

SFS_pop_mat <- cbind(SFS_pop_mat, SFS_pop)

}

colnames(SFS_pop_mat) <- paste0("pop ", 1:length(pop_name))

return(SFS_pop_mat)

}, mc.cores = length(genomeClassSplit_list_syn), mc.preschedule = F)

# nonsyn

SFS_means_list_nonsyn <- mclapply(seq_along(genomeClassSplit_list_nonsyn), function(x) {

SFS_pop_mat <- NULL

for(p in 1:length(pop_name)) {

SFS_pop <- sapply(genomeClassSplit_list_nonsyn[[x]]@region.stats@minor.allele.freqs, function(y) {

if(length(y) == 0) {

return(NA)

} else {

return(mean(y[p,], na.rm = T))

}

})

SFS_pop_mat <- cbind(SFS_pop_mat, SFS_pop)

}

colnames(SFS_pop_mat) <- paste0("pop ", 1:length(pop_name))

return(SFS_pop_mat)

}, mc.cores = length(genomeClassSplit_list_nonsyn), mc.preschedule = F)

# Calculate composite-likelihood-ratio (CLR) tests from Nielsen

print("CLR")

# all

genomeClassSplit_list_all2 <- mclapply(seq_along(genomeClassSplit_list_all), function(x) {

# Create a list in which each element is a table of frequencies of minor allele frequencies

# across all genes for the given population

MAF_freqTable_list <- lapply(seq_along(pop_name), function(p) {

table( unlist(

sapply(genomeClassSplit_list_all[[x]]@region.stats@minor.allele.freqs, function(y) {

return(y[p,])

})

))

})

# Use MAF_freqTable_list as input for CLR test

return(sweeps.stats(genomeClassSplit_list_all[[x]],

freq.table = MAF_freqTable_list))

})

# syn

genomeClassSplit_list_syn2 <- mclapply(seq_along(genomeClassSplit_list_syn), function(x) {

# Create a list in which each element is a table of frequencies of minor allele frequencies

# across all genes for the given population

MAF_freqTable_list <- lapply(seq_along(pop_name), function(p) {

table( unlist(

sapply(genomeClassSplit_list_syn[[x]]@region.stats@minor.allele.freqs, function(y) {

return(y[p,])

})

))

})

# Use MAF_freqTable_list as input for CLR test

return(sweeps.stats(genomeClassSplit_list_syn[[x]],

freq.table = MAF_freqTable_list,

subsites = "syn"))

})

# nonsyn

genomeClassSplit_list_nonsyn2 <- mclapply(seq_along(genomeClassSplit_list_nonsyn), function(x) {

# Create a list in which each element is a table of frequencies of minor allele frequencies

# across all genes for the given population

MAF_freqTable_list <- lapply(seq_along(pop_name), function(p) {

table( unlist(

sapply(genomeClassSplit_list_nonsyn[[x]]@region.stats@minor.allele.freqs, function(y) {

return(y[p,])

})

))

})

# Use MAF_freqTable_list as input for CLR test

return(sweeps.stats(genomeClassSplit_list_nonsyn[[x]],

freq.table = MAF_freqTable_list,

subsites = "nonsyn"))

})

genomeClassSplit_list_all <- genomeClassSplit_list_all2

genomeClassSplit_list_syn <- genomeClassSplit_list_syn2

genomeClassSplit_list_nonsyn <- genomeClassSplit_list_nonsyn2

rm(genomeClassSplit_list_all2, genomeClassSplit_list_syn2, genomeClassSplit_list_nonsyn2); gc()

# Calculate recombination statistics (Hudson's RM)

genomeClassSplit_list_all2 <- mclapply(seq_along(genomeClassSplit_list_all), function(x) {

recomb.stats(genomeClassSplit_list_all[[x]])

}, mc.cores = length(genomeClassSplit_list_all), mc.preschedule = F)

genomeClassSplit_list_syn2 <- mclapply(seq_along(genomeClassSplit_list_syn), function(x) {

recomb.stats(genomeClassSplit_list_syn[[x]],

subsites = "syn")

}, mc.cores = length(genomeClassSplit_list_syn), mc.preschedule = F)

genomeClassSplit_list_nonsyn2 <- mclapply(seq_along(genomeClassSplit_list_nonsyn), function(x) {

recomb.stats(genomeClassSplit_list_nonsyn[[x]],

subsites = "nonsyn")

}, mc.cores = length(genomeClassSplit_list_nonsyn), mc.preschedule = F)

genomeClassSplit_list_all <- genomeClassSplit_list_all2

genomeClassSplit_list_syn <- genomeClassSplit_list_syn2

genomeClassSplit_list_nonsyn <- genomeClassSplit_list_nonsyn2

rm(genomeClassSplit_list_all2, genomeClassSplit_list_syn2, genomeClassSplit_list_nonsyn2); gc()

# Calculate linkage disequilibrium (LD) statistics

print("linkage")

genomeClassSplit_list_all2 <- mclapply(seq_along(genomeClassSplit_list_all), function(x) {

linkage.stats(genomeClassSplit_list_all[[x]],

detail = T, do.ZnS = T, do.WALL = T)

}, mc.cores = length(genomeClassSplit_list_all), mc.preschedule = F)

genomeClassSplit_list_syn2 <- mclapply(seq_along(genomeClassSplit_list_syn), function(x) {

linkage.stats(genomeClassSplit_list_syn[[x]],

detail = T, do.ZnS = T, do.WALL = T, subsites = "syn")

}, mc.cores = length(genomeClassSplit_list_syn), mc.preschedule = F)

genomeClassSplit_list_nonsyn2 <- mclapply(seq_along(genomeClassSplit_list_nonsyn), function(x) {

linkage.stats(genomeClassSplit_list_nonsyn[[x]],

detail = T, do.ZnS = T, do.WALL = T, subsites = "nonsyn")

}, mc.cores = length(genomeClassSplit_list_nonsyn), mc.preschedule = F)

genomeClassSplit_list_all <- genomeClassSplit_list_all2

genomeClassSplit_list_syn <- genomeClassSplit_list_syn2

genomeClassSplit_list_nonsyn <- genomeClassSplit_list_nonsyn2

rm(genomeClassSplit_list_all2, genomeClassSplit_list_syn2, genomeClassSplit_list_nonsyn2); gc()

# Calculate mean LD statistics for each gene in each population

# all

d_raw_means_list_all <- mclapply(seq_along(genomeClassSplit_list_all), function(x) {

d_raw_pop_mat <- NULL

for(p in 1:length(pop_name)) {

d_raw_pop <- sapply(genomeClassSplit_list_all[[x]]@region.stats@linkage.disequilibrium, function(y) {

if(length(y) <= 1) {

return(NA)

} else if(length(y[p,1][[1]]) == 0) {

return(NA)

} else {

return(mean(y[p,1][[1]][rownames(y[p,1][[1]]) == "d_raw",], na.rm = T))

}

})

d_raw_pop_mat <- cbind(d_raw_pop_mat, d_raw_pop)

}

colnames(d_raw_pop_mat) <- paste0("pop ", 1:length(pop_name))

return(d_raw_pop_mat)

}, mc.cores = length(genomeClassSplit_list_all), mc.preschedule = F)

# syn

d_raw_means_list_syn <- mclapply(seq_along(genomeClassSplit_list_syn), function(x) {

d_raw_pop_mat <- NULL

for(p in 1:length(pop_name)) {

d_raw_pop <- sapply(genomeClassSplit_list_syn[[x]]@region.stats@linkage.disequilibrium, function(y) {

if(length(y) <= 1) {

return(NA)

} else if(length(y[p,1][[1]]) == 0) {

return(NA)

} else {

return(mean(y[p,1][[1]][rownames(y[p,1][[1]]) == "d_raw",], na.rm = T))

}

})

d_raw_pop_mat <- cbind(d_raw_pop_mat, d_raw_pop)

}

colnames(d_raw_pop_mat) <- paste0("pop ", 1:length(pop_name))

return(d_raw_pop_mat)

}, mc.cores = length(genomeClassSplit_list_syn), mc.preschedule = F)

# nonsyn

d_raw_means_list_nonsyn <- mclapply(seq_along(genomeClassSplit_list_nonsyn), function(x) {

d_raw_pop_mat <- NULL

for(p in 1:length(pop_name)) {

d_raw_pop <- sapply(genomeClassSplit_list_nonsyn[[x]]@region.stats@linkage.disequilibrium, function(y) {

if(length(y) <= 1) {

return(NA)

} else if(length(y[p,1][[1]]) == 0) {

return(NA)

} else {

return(mean(y[p,1][[1]][rownames(y[p,1][[1]]) == "d_raw",], na.rm = T))

}

})

d_raw_pop_mat <- cbind(d_raw_pop_mat, d_raw_pop)

}

colnames(d_raw_pop_mat) <- paste0("pop ", 1:length(pop_name))

return(d_raw_pop_mat)

}, mc.cores = length(genomeClassSplit_list_nonsyn), mc.preschedule = F)

# all

d_prime_means_list_all <- mclapply(seq_along(genomeClassSplit_list_all), function(x) {

d_prime_pop_mat <- NULL

for(p in 1:length(pop_name)) {

d_prime_pop <- sapply(genomeClassSplit_list_all[[x]]@region.stats@linkage.disequilibrium, function(y) {

if(length(y) <= 1) {

return(NA)

} else if(length(y[p,1][[1]]) == 0) {

return(NA)

} else {

return(mean(y[p,1][[1]][rownames(y[p,1][[1]]) == "d_prime",], na.rm = T))

}

})

d_prime_pop_mat <- cbind(d_prime_pop_mat, d_prime_pop)

}

colnames(d_prime_pop_mat) <- paste0("pop ", 1:length(pop_name))

return(d_prime_pop_mat)

}, mc.cores = length(genomeClassSplit_list_all), mc.preschedule = F)

# syn

d_prime_means_list_syn <- mclapply(seq_along(genomeClassSplit_list_syn), function(x) {

d_prime_pop_mat <- NULL

for(p in 1:length(pop_name)) {

d_prime_pop <- sapply(genomeClassSplit_list_syn[[x]]@region.stats@linkage.disequilibrium, function(y) {

if(length(y) <= 1) {

return(NA)

} else if(length(y[p,1][[1]]) == 0) {

return(NA)

} else {

return(mean(y[p,1][[1]][rownames(y[p,1][[1]]) == "d_prime",], na.rm = T))

}

})

d_prime_pop_mat <- cbind(d_prime_pop_mat, d_prime_pop)

}

colnames(d_prime_pop_mat) <- paste0("pop ", 1:length(pop_name))

return(d_prime_pop_mat)

}, mc.cores = length(genomeClassSplit_list_syn), mc.preschedule = F)

# nonsyn

d_prime_means_list_nonsyn <- mclapply(seq_along(genomeClassSplit_list_nonsyn), function(x) {

d_prime_pop_mat <- NULL

for(p in 1:length(pop_name)) {

d_prime_pop <- sapply(genomeClassSplit_list_nonsyn[[x]]@region.stats@linkage.disequilibrium, function(y) {

if(length(y) <= 1) {

return(NA)

} else if(length(y[p,1][[1]]) == 0) {

return(NA)

} else {

return(mean(y[p,1][[1]][rownames(y[p,1][[1]]) == "d_prime",], na.rm = T))

}

})

d_prime_pop_mat <- cbind(d_prime_pop_mat, d_prime_pop)

}

colnames(d_prime_pop_mat) <- paste0("pop ", 1:length(pop_name))

return(d_prime_pop_mat)

}, mc.cores = length(genomeClassSplit_list_nonsyn), mc.preschedule = F)

# all

d_dist_means_list_all <- mclapply(seq_along(genomeClassSplit_list_all), function(x) {

d_dist_pop_mat <- NULL

for(p in 1:length(pop_name)) {

d_dist_pop <- sapply(genomeClassSplit_list_all[[x]]@region.stats@linkage.disequilibrium, function(y) {

if(length(y) <= 1) {

return(NA)

} else if(length(y[p,1][[1]]) == 0) {

return(NA)

} else {

return(mean(y[p,1][[1]][rownames(y[p,1][[1]]) == "d_dist",], na.rm = T))

}

})

d_dist_pop_mat <- cbind(d_dist_pop_mat, d_dist_pop)

}

colnames(d_dist_pop_mat) <- paste0("pop ", 1:length(pop_name))

return(d_dist_pop_mat)

}, mc.cores = length(genomeClassSplit_list_all), mc.preschedule = F)

# syn

d_dist_means_list_syn <- mclapply(seq_along(genomeClassSplit_list_syn), function(x) {

d_dist_pop_mat <- NULL

for(p in 1:length(pop_name)) {

d_dist_pop <- sapply(genomeClassSplit_list_syn[[x]]@region.stats@linkage.disequilibrium, function(y) {

if(length(y) <= 1) {

return(NA)

} else if(length(y[p,1][[1]]) == 0) {

return(NA)

} else {

return(mean(y[p,1][[1]][rownames(y[p,1][[1]]) == "d_dist",], na.rm = T))

}

})

d_dist_pop_mat <- cbind(d_dist_pop_mat, d_dist_pop)

}

colnames(d_dist_pop_mat) <- paste0("pop ", 1:length(pop_name))

return(d_dist_pop_mat)

}, mc.cores = length(genomeClassSplit_list_syn), mc.preschedule = F)

# nonsyn

d_dist_means_list_nonsyn <- mclapply(seq_along(genomeClassSplit_list_nonsyn), function(x) {

d_dist_pop_mat <- NULL

for(p in 1:length(pop_name)) {

d_dist_pop <- sapply(genomeClassSplit_list_nonsyn[[x]]@region.stats@linkage.disequilibrium, function(y) {

if(length(y) <= 1) {

return(NA)

} else if(length(y[p,1][[1]]) == 0) {

return(NA)

} else {

return(mean(y[p,1][[1]][rownames(y[p,1][[1]]) == "d_dist",], na.rm = T))

}

})

d_dist_pop_mat <- cbind(d_dist_pop_mat, d_dist_pop)

}

colnames(d_dist_pop_mat) <- paste0("pop ", 1:length(pop_name))

return(d_dist_pop_mat)

}, mc.cores = length(genomeClassSplit_list_nonsyn), mc.preschedule = F)

# all

r2_means_list_all <- mclapply(seq_along(genomeClassSplit_list_all), function(x) {

r2_pop_mat <- NULL

for(p in 1:length(pop_name)) {

r2_pop <- sapply(genomeClassSplit_list_all[[x]]@region.stats@linkage.disequilibrium, function(y) {

if(length(y) <= 1) {

return(NA)

} else if(length(y[p,1][[1]]) == 0) {

return(NA)

} else {

return(mean(y[p,1][[1]][rownames(y[p,1][[1]]) == "r2",], na.rm = T))

}

})

r2_pop_mat <- cbind(r2_pop_mat, r2_pop)

}

colnames(r2_pop_mat) <- paste0("pop ", 1:length(pop_name))

return(r2_pop_mat)

}, mc.cores = length(genomeClassSplit_list_all), mc.preschedule = F)

# syn

r2_means_list_syn <- mclapply(seq_along(genomeClassSplit_list_syn), function(x) {

r2_pop_mat <- NULL

for(p in 1:length(pop_name)) {

r2_pop <- sapply(genomeClassSplit_list_syn[[x]]@region.stats@linkage.disequilibrium, function(y) {

if(length(y) <= 1) {

return(NA)

} else if(length(y[p,1][[1]]) == 0) {

return(NA)

} else {

return(mean(y[p,1][[1]][rownames(y[p,1][[1]]) == "r2",], na.rm = T))

}

})

r2_pop_mat <- cbind(r2_pop_mat, r2_pop)

}

colnames(r2_pop_mat) <- paste0("pop ", 1:length(pop_name))

return(r2_pop_mat)

}, mc.cores = length(genomeClassSplit_list_syn), mc.preschedule = F)

# nonsyn

r2_means_list_nonsyn <- mclapply(seq_along(genomeClassSplit_list_nonsyn), function(x) {

r2_pop_mat <- NULL

for(p in 1:length(pop_name)) {

r2_pop <- sapply(genomeClassSplit_list_nonsyn[[x]]@region.stats@linkage.disequilibrium, function(y) {

if(length(y) <= 1) {

return(NA)

} else if(length(y[p,1][[1]]) == 0) {

return(NA)

} else {

return(mean(y[p,1][[1]][rownames(y[p,1][[1]]) == "r2",], na.rm = T))

}

})

r2_pop_mat <- cbind(r2_pop_mat, r2_pop)

}

colnames(r2_pop_mat) <- paste0("pop ", 1:length(pop_name))

return(r2_pop_mat)

}, mc.cores = length(genomeClassSplit_list_nonsyn), mc.preschedule = F)

# all

r_means_list_all <- mclapply(seq_along(genomeClassSplit_list_all), function(x) {

r_pop_mat <- NULL

for(p in 1:length(pop_name)) {

r_pop <- sapply(genomeClassSplit_list_all[[x]]@region.stats@linkage.disequilibrium, function(y) {

if(length(y) <= 1) {

return(NA)

} else if(length(y[p,1][[1]]) == 0) {

return(NA)

} else {

return(mean(y[p,1][[1]][rownames(y[p,1][[1]]) == "r",], na.rm = T))

}

})

r_pop_mat <- cbind(r_pop_mat, r_pop)

}

colnames(r_pop_mat) <- paste0("pop ", 1:length(pop_name))

return(r_pop_mat)

}, mc.cores = length(genomeClassSplit_list_all), mc.preschedule = F)

# syn

r_means_list_syn <- mclapply(seq_along(genomeClassSplit_list_syn), function(x) {

r_pop_mat <- NULL

for(p in 1:length(pop_name)) {

r_pop <- sapply(genomeClassSplit_list_syn[[x]]@region.stats@linkage.disequilibrium, function(y) {

if(length(y) <= 1) {

return(NA)

} else if(length(y[p,1][[1]]) == 0) {

return(NA)

} else {

return(mean(y[p,1][[1]][rownames(y[p,1][[1]]) == "r",], na.rm = T))

}

})

r_pop_mat <- cbind(r_pop_mat, r_pop)

}

colnames(r_pop_mat) <- paste0("pop ", 1:length(pop_name))

return(r_pop_mat)

}, mc.cores = length(genomeClassSplit_list_syn), mc.preschedule = F)

# nonsyn

r_means_list_nonsyn <- mclapply(seq_along(genomeClassSplit_list_nonsyn), function(x) {

r_pop_mat <- NULL

for(p in 1:length(pop_name)) {

r_pop <- sapply(genomeClassSplit_list_nonsyn[[x]]@region.stats@linkage.disequilibrium, function(y) {

if(length(y) <= 1) {

return(NA)

} else if(length(y[p,1][[1]]) == 0) {

return(NA)

} else {

return(mean(y[p,1][[1]][rownames(y[p,1][[1]]) == "r",], na.rm = T))

}

})

r_pop_mat <- cbind(r_pop_mat, r_pop)

}

colnames(r_pop_mat) <- paste0("pop ", 1:length(pop_name))

return(r_pop_mat)

}, mc.cores = length(genomeClassSplit_list_nonsyn), mc.preschedule = F)

## Calculate additional LD statistics (r2, Fisher exact test P-value, and distance)

## NOTE: commented out as the above, more detailed LD statistics (d_raw, d_prime, d_dist, r2, r)

## would be replaced with those generated by calc.R2 (in genomeClassSplit_list_nonsyn[[x]]@region.stats@linkage.disequilibrium)

#genomeClassSplit_list_all2 <- mclapply(seq_along(genomeClassSplit_list_all), function(x) {

# calc.R2(genomeClassSplit_list_all[[x]])

#}, mc.cores = length(genomeClassSplit_list_all), mc.preschedule = F)

#genomeClassSplit_list_syn2 <- mclapply(seq_along(genomeClassSplit_list_syn), function(x) {

# calc.R2(genomeClassSplit_list_syn[[x]],

# subsites = "syn")

#}, mc.cores = length(genomeClassSplit_list_syn), mc.preschedule = F)

#genomeClassSplit_list_nonsyn2 <- mclapply(seq_along(genomeClassSplit_list_nonsyn), function(x) {

# calc.R2(genomeClassSplit_list_nonsyn[[x]],

# subsites = "nonsyn")

#}, mc.cores = length(genomeClassSplit_list_nonsyn), mc.preschedule = F)

# For each population, combine statistics into one dataframe

popgen_stats_pop_list <- mclapply(seq_along(pop_name), function(w) {

#for(w in seq_along(pop_name)) {

popgen_stats_chr_list <- lapply(seq_along(genomeClassSplit_list_all), function(x) {

data.frame(chr = as.character(chrs[x]),

start = as.integer(sub(pattern = " - \\d+", replacement = "",

x = genomeClassSplit_list_all[[x]]@region.names)),

end = as.integer(sub(pattern = "\\d+ - ", replacement = "",

x = genomeClassSplit_list_all[[x]]@region.names)),

width = as.integer(genomeClassSplit_list_all[[x]]@n.sites),

## OR

#width = as.integer( ( as.integer(sub(pattern = "\\d+ - ", replacement = "",

# x = genomeClassSplit_list_all[[x]]@region.names)) -

# as.integer(sub(pattern = " - \\d+", replacement = "",

# x = genomeClassSplit_list_all[[x]]@region.names)) ) + 1 ),

strand = as.character(features[features$V1 == chrs[x],]$V7),

ID = as.character(features[features$V1 == chrs[x],]$V9),

# all

nuc.diversity.within_all = as.numeric(genomeClassSplit_list_all[[x]]@nuc.diversity.within[,w]),

hap.diversity.within_all = as.numeric(genomeClassSplit_list_all[[x]]@hap.diversity.within[,w]),

Pi_Nei_all = as.numeric(genomeClassSplit_list_all[[x]]@Pi[,w]),

nuc.F_ST.vs.all_all = as.numeric(genomeClassSplit_list_all[[x]]@nuc.F_ST.vs.all[,w]),

nucleotide.F_ST_all = as.numeric(genomeClassSplit_list_all[[x]]@nucleotide.F_ST[,1]),

n.segregating.sites_all = as.numeric(genomeClassSplit_list_all[[x]]@n.segregating.sites[,w]),

Tajima.D_all = as.numeric(genomeClassSplit_list_all[[x]]@Tajima.D[,w]),

Rozas.R_2_all = as.numeric(genomeClassSplit_list_all[[x]]@Rozas.R_2[,w]),

Fu.Li.F_all = as.numeric(genomeClassSplit_list_all[[x]]@Fu.Li.F[,w]),

Fu.Li.D_all = as.numeric(genomeClassSplit_list_all[[x]]@Fu.Li.D[,w]),

theta_Tajima_all = as.numeric(genomeClassSplit_list_all[[x]]@theta_Tajima[,w]),

theta_Watterson_all = as.numeric(genomeClassSplit_list_all[[x]]@theta_Watterson[,w]),

theta_Fu.Li_all = as.numeric(genomeClassSplit_list_all[[x]]@theta_Fu.Li[,w]),

theta_Achaz.Tajima_all = as.numeric(genomeClassSplit_list_all[[x]]@theta_Achaz.Tajima[,w]),

theta_Achaz.Watterson_all = as.numeric(genomeClassSplit_list_all[[x]]@theta_Achaz.Watterson[,w]),

SFS_all = as.numeric(SFS_means_list_all[[x]][,w]),

CLR_all = as.numeric(genomeClassSplit_list_all[[x]]@CLR[,w]),

CL_all = as.numeric(genomeClassSplit_list_all[[x]]@CL[,w]),
[truncated: 225,512 more chars]
