# Supplementary material for: Crossover-active regions of the wheat genome are distinguished by DMC1, the chromosome axis, H3K27me3, and signatures of adaptation
Source: HighWire-hosted journal article supplement (doi:10.1101/gr.273672.120), 2021-08-23
Supplement: Supplemental_Tables.xlsx [file Supplemental_Tables.xlsx]

## Sheet: TableS1
Crossover-active regions of the wheat genome are distinguished by DMC1, the chromosome axis, H3K27me3 and signatures of adaptation
Andrew J. Tock1*,†, Daniel M. Holland1,†, Wei Jiang1, Kim Osman2, Eugenio Sanchez-Moran2, James D. Higgins3, Keith J. Edwards4, Cristobal Uauy5, F. Chris H. Franklin2 and Ian R. Henderson1*
1 Department of Plant Sciences, University of Cambridge, Cambridge CB2 3EA, United Kingdom
2 School of Biosciences, University of Birmingham, Birmingham B15 2TT, United Kingdom
3 Department of Genetics and Genome Biology, University of Leicester, Leicester LE1 7RH, United Kingdom
4 School of Biological Sciences, University of Bristol, Bristol BS8 1TQ, United Kingdom
5 John Innes Centre, Norwich NR4 7UH, United Kingdom
† These authors contributed equally to this work.
* Corresponding authors: irh25@cam.ac.uk and ajt200@cam.ac.uk
CONTENTS:
Sheets 1–24: Supplemental Tables S1–S24
Supplemental Table S1. Alignment and filtering of chromatin immunoprecipitation (ChIP) and micrococcal nuclease (MNase) sequencing reads. Deduplicated and trimmed reads were aligned to the RefSeq v1.0 Chinese Spring reference genome (International Wheat Genome Sequencing Consortium; IWGSC 2018) using Bowtie 2 v2.3.4.3 (Langmead and Salzberg 2012). Uniquely and multiply aligning reads with more th…
Library	Total sequenced read pairs	Deduplicated	Trimmed	Primary alignments (MAPQ ≥2)	Multi and unique alignments (MAPQ ≥2, mismatches ≤6)	Unique alignments (MAPQ ≥23, mismatches ≤6)	Study	Accession	Alignment rate (%)
DMC1	249450600	221066159	218747974	185448819	180557334	117836477	This study	E-MTAB-9632	85
ASY1	504422321	406896144	405615455	344590350	339460858	250348245	This study	E-MTAB-9632	85
H3K4me3	265469667	184425952	182801039	160990096	157499852	122814079	This study	E-MTAB-9632	88
H3K9me2	662411032	535542507	532325170	469944895	460295805	359205604	This study	E-MTAB-9632	88
H3K27me1	175074140	162059002	161268379	130180432	124545255	61899980	This study	E-MTAB-9632	81
MNase	810498832	546706086	546564729	467361139	460924919	357543153	This study	E-MTAB-9633	86
H3K9ac	524005339	435528431	434063547	381160572	375018956	292931749	IWGSC (2018)	SRR6350667	88
H3K27me3	613875351	517492851	515913396	437455742	429700566	332061469	IWGSC (2018)	SRR6350666	85
H3K36me3	540914196	464402958	462932428	404684087	396329654	288397519	IWGSC (2018)	SRR6350670	87
Input	293570224	257611386	256826011	219616360	216191089	164564496	IWGSC (2018)	SRR6350669	86
H3K4me1	84898826	52689719	52308982	7260340	6653931	4236446	Li et al. (2019)	SRR8126618	14
H3K27ac	105866703	100742273	100560989	33556010	30554714	19648945	Li et al. (2019)	SRR8126621	33
CENH3	32066306	29951038	27398986	18098347	17765977	13359298	Guo et al. (2016)	SRR1686799	66

## Sheet: TableS2
Supplemental Table S2. Overlap of DMC1 peaks with other genomic features. DMC1 ChIP-seq peaks within distal compartments (R1 and R3; n=101,076) and within interstitial and proximal compartments (R2 and C; n=170,649) of each subgenome were evaluated for overlap with genomic features within other annotation categories using permutation tests implemented in the Bioconductor package regioneR v1.6.2 (…
Subgenome compartments	Feature	Feature number	Expected overlaps	Observed overlaps	P-value	Local Z-score
A-genome R1 & R3	ASY1	68356	1242	7230	0.0001	33.9879
A-genome R1 & R3	H3K4me3	110169	2211	1417	0.0193	-2.4801
A-genome R1 & R3	H3K9me2	64840	1014	469	0.0001	-4.9382
A-genome R1 & R3	H3K27me1	118884	1501	2554	0.0001	6.1765
A-genome R1 & R3	H3K27me3	238270	4459	6425	0.0001	2.9949
A-genome R1 & R3	H3K36me3	95829	1783	2464	0.0001	2.8467
A-genome R1 & R3	H3K9ac	111121	2128	3225	0.0001	3.7303
A-genome R1 & R3	H3K4me1	7346	164	495	0.0001	13.3292
A-genome R1 & R3	H3K27ac	36579	626	973	0.0001	3.8841
A-genome R1 & R3	MNase	362386	6702	4624	0.0321	-2.372
A-genome R1 & R3	Genes	17562	1499	2237	0.0001	3.5639
A-genome R1 & R3	Gene promoters	17562	601	1116	0.0001	5.9174
A-genome R1 & R3	Gene 5' ends	17562	384	337	0.2305	-0.8188
A-genome R1 & R3	Gene 3' ends	17562	385	568	0.0001	3.2675
A-genome R1 & R3	Gene terminators	17562	588	1268	0.0001	8.3228
A-genome R1 & R3	NLR-encoding genes	429	72	109	0.0001	2.4263
A-genome R1 & R3	NLR-encoding gene promoters	429	16	27	0.0097	2.4091
A-genome R1 & R3	NLR-encoding gene 5' ends	429	10	9	0.4513	-0.3334
A-genome R1 & R3	NLR-encoding gene 3' ends	429	10	15	0.0929	1.4526
A-genome R1 & R3	NLR-encoding gene terminators	429	16	29	0.0097	2.5959
A-genome R1 & R3	Meiotic genes	130	24	33	0.0417	1.7463
A-genome R1 & R3	Meiotic gene promoters	130	4	14	0.0001	4.3039
A-genome R1 & R3	Meiotic gene 5' ends	130	3	0	0.0705	-1.6986
A-genome R1 & R3	Meiotic gene 3' ends	130	3	8	0.0097	2.9788
A-genome R1 & R3	Meiotic gene terminators	130	5	8	0.0801	1.6
A-genome R1 & R3	CACTA	85877	7288	7943	0.3953	0.6759
A-genome R1 & R3	Harbinger	6341	240	240	0.4769	-0.0055
A-genome R1 & R3	hAT	164	6	8	0.2561	0.7549
A-genome R1 & R3	Helitrons	84	3	6	0.0545	2.1147
A-genome R1 & R3	Mariner	22211	301	856	0.0001	13.6475
A-genome R1 & R3	Mutator	11986	388	707	0.0001	5.6096
A-genome R1 & R3	Unclassified class 2	1032	25	44	0.0001	3.1186
A-genome R1 & R3	Unclassified with TIRs	14865	336	711	0.0001	7.9916
A-genome R1 & R3	Copia LTR	54587	9195	5895	0.0033	-2.8872
A-genome R1 & R3	Gypsy LTR	94759	14209	11318	0.0577	-1.7171
A-genome R1 & R3	LINE	15078	804	784	0.3777	-0.1826
A-genome R1 & R3	SINE	715	11	18	0.0385	1.951
A-genome R1 & R3	Unclassified LTR	10663	1076	840	0.0737	-1.7405
A-genome R1 & R3	Unclassified repeats	31093	790	1526	0.0001	6.3978
A-genome R2 & C	ASY1	135839	1624	7634	0.0001	150.839
A-genome R2 & C	H3K4me3	70627	1006	747	0.0001	-8.0566
A-genome R2 & C	H3K9me2	571716	6871	2432	0.0001	-45.8991
A-genome R2 & C	H3K27me1	664077	5572	8970	0.0001	42.9564
A-genome R2 & C	H3K27me3	218202	2281	3225	0.0001	18.3927
A-genome R2 & C	H3K36me3	228917	2712	3491	0.0001	14.3664
A-genome R2 & C	H3K9ac	192787	2280	3371	0.0001	23.8745
A-genome R2 & C	H3K4me1	15885	246	556	0.0001	21.6068
A-genome R2 & C	H3K27ac	72480	839	895	0.0161	1.8802
A-genome R2 & C	MNase	901489	11117	6537	0.0001	-38.2997
A-genome R2 & C	Genes	17783	1299	2521	0.0001	33.046
A-genome R2 & C	Gene promoters	17783	419	964	0.0001	25.0372
A-genome R2 & C	Gene 5' ends	17783	268	232	0.0097	-2.117
A-genome R2 & C	Gene 3' ends	17783	264	544	0.0001	17.9091
A-genome R2 & C	Gene terminators	17783	402	1065	0.0001	33.1571
A-genome R2 & C	NLR-encoding genes	48	5	6	0.4289	0.3022
A-genome R2 & C	NLR-encoding gene promoters	48	1	4	0.0321	2.6927
A-genome R2 & C	NLR-encoding gene 5' ends	48	1	0	0.4881	-0.8515
A-genome R2 & C	NLR-encoding gene 3' ends	48	1	2	0.1985	1.3475
A-genome R2 & C	NLR-encoding gene terminators	48	1	4	0.0321	2.599
A-genome R2 & C	Meiotic genes	225	30	60	0.0001	5.3347
A-genome R2 & C	Meiotic gene promoters	225	5	26	0.0001	9.2537
A-genome R2 & C	Meiotic gene 5' ends	225	3	3	0.5584	-0.2223
A-genome R2 & C	Meiotic gene 3' ends	225	3	9	0.0065	3.1928
A-genome R2 & C	Meiotic gene terminators	225	5	11	0.0449	2.2024
A-genome R2 & C	CACTA	181976	15250	13711	0.0001	-10.4991
A-genome R2 & C	Harbinger	9421	227	287	0.0001	4.1675
A-genome R2 & C	hAT	244	7	2	0.0321	-1.8399
A-genome R2 & C	Helitrons	149	5	4	0.5248	-0.2887
A-genome R2 & C	Mariner	33301	372	891	0.0001	25.0907
A-genome R2 & C	Mutator	16736	416	737	0.0001	16.3615
A-genome R2 & C	Unclassified class 2	2595	66	62	0.3441	-0.4808
A-genome R2 & C	Unclassified with TIRs	21053	316	729	0.0001	22.8747
A-genome R2 & C	Copia LTR	127775	18270	13688	0.0001	-27.2778
A-genome R2 & C	Gypsy LTR	418835	43018	38495	0.0001	-13.8878
A-genome R2 & C	LINE	19790	877	770	0.0001	-3.6653
A-genome R2 & C	SINE	1669	19	26	0.0833	1.548
A-genome R2 & C	Unclassified LTR	34536	3242	2491	0.0001	-12.1373
A-genome R2 & C	Unclassified repeats	34078	668	1421	0.0001	26.547
B-genome R1 & R3	ASY1	62398	1069	7308	0.0001	41.9351
B-genome R1 & R3	H3K4me3	119854	2162	1495	0.0577	-2.0106
B-genome R1 & R3	H3K9me2	66934	981	497	0.0001	-5.246
B-genome R1 & R3	H3K27me1	114580	1376	2414	0.0001	7.6338
B-genome R1 & R3	H3K27me3	259402	4320	6602	0.0001	3.3002
B-genome R1 & R3	H3K36me3	101796	1712	2491	0.0001	3.4843
B-genome R1 & R3	H3K9ac	116838	2018	3245	0.0001	4.4233
B-genome R1 & R3	H3K4me1	6867	136	557	0.0001	19.2513
B-genome R1 & R3	H3K27ac	35534	562	1026	0.0001	5.9003
B-genome R1 & R3	MNase	411361	6955	4633	0.0065	-2.6535
B-genome R1 & R3	Genes	15645	1279	2069	0.0001	4.6277
B-genome R1 & R3	Gene promoters	15645	497	921	0.0001	6.3819
B-genome R1 & R3	Gene 5' ends	15645	320	268	0.1377	-1.1354
B-genome R1 & R3	Gene 3' ends	15645	316	524	0.0001	4.568
B-genome R1 & R3	Gene terminators	15645	484	1090	0.0001	8.7305
B-genome R1 & R3	NLR-encoding genes	500	78	140	0.0033	3.4856
B-genome R1 & R3	NLR-encoding gene promoters	500	16	27	0.0321	2.181
B-genome R1 & R3	NLR-encoding gene 5' ends	500	10	12	0.3569	0.4669
B-genome R1 & R3	NLR-encoding gene 3' ends	500	10	19	0.0225	2.4596
B-genome R1 & R3	NLR-encoding gene terminators	500	16	24	0.0737	1.6268
B-genome R1 & R3	Meiotic genes	122	18	40	0.0001	4.604
B-genome R1 & R3	Meiotic gene promoters	122	4	5	0.3809	0.4796
B-genome R1 & R3	Meiotic gene 5' ends	122	3	4	0.2705	0.9509
B-genome R1 & R3	Meiotic gene 3' ends	122	2	5	0.0913	1.7576
B-genome R1 & R3	Meiotic gene terminators	122	4	10	0.0033	3.2004
B-genome R1 & R3	CACTA	100279	8568	9451	0.2369	0.8226
B-genome R1 & R3	Harbinger	6188	217	218	0.504	0.045
B-genome R1 & R3	hAT	170	4	4	0.5744	-0.0915
B-genome R1 & R3	Helitrons	81	2	2	0.6512	-0.0766
B-genome R1 & R3	Mariner	25382	326	884	0.0001	12.6385
B-genome R1 & R3	Mutator	12775	390	748	0.0001	6.8061
B-genome R1 & R3	Unclassified class 2	1396	41	30	0.0961	-1.4492
B-genome R1 & R3	Unclassified with TIRs	13945	311	646	0.0001	7.2525
B-genome R1 & R3	Copia LTR	51848	8188	5574	0.0065	-2.8117
B-genome R1 & R3	Gypsy LTR	95275	13279	10501	0.0673	-1.892
B-genome R1 & R3	LINE	15831	793	691	0.1729	-0.9946
B-genome R1 & R3	SINE	1042	16	12	0.2177	-0.9309
B-genome R1 & R3	Unclassified LTR	12856	1342	1048	0.0545	-1.8658
B-genome R1 & R3	Unclassified repeats	54915	1008	1717	0.0001	5.324
B-genome R2 & C	ASY1	121340	1353	7966	0.0001	166.727
B-genome R2 & C	H3K4me3	92144	1149	765	0.0001	-10.8259
B-genome R2 & C	H3K9me2	570004	6221	2172	0.0001	-36.3835
B-genome R2 & C	H3K27me1	653029	5007	8345	0.0001	43.7693
B-genome R2 & C	H3K27me3	271205	2625	4245	0.0001	32.6569
B-genome R2 & C	H3K36me3	259535	2789	3916	0.0001	19.0239
B-genome R2 & C	H3K9ac	225587	2414	3819	0.0001	26.9027
B-genome R2 & C	H3K4me1	16893	227	904	0.0001	45.6985
B-genome R2 & C	H3K27ac	76287	800	1177	0.0001	13.7545
B-genome R2 & C	MNase	1024876	11420	6081	0.0001	-37.973
B-genome R2 & C	Genes	19997	1314	2498	0.0001	35.1224
B-genome R2 & C	Gene promoters	19997	420	940	0.0001	25.9369
B-genome R2 & C	Gene 5' ends	19997	270	272	0.4801	0.134
B-genome R2 & C	Gene 3' ends	19997	266	556	0.0001	19.1412
B-genome R2 & C	Gene terminators	19997	408	1103	0.0001	33.7438
B-genome R2 & C	NLR-encoding genes	78	7	16	0.0001	3.1775
B-genome R2 & C	NLR-encoding gene promoters	78	2	9	0.0001	5.9752
B-genome R2 & C	NLR-encoding gene 5' ends	78	1	0	0.3841	-0.9724
B-genome R2 & C	NLR-encoding gene 3' ends	78	1	4	0.0289	2.9718
B-genome R2 & C	NLR-encoding gene terminators	78	2	5	0.0225	2.8325
B-genome R2 & C	Meiotic genes	233	29	49	0.0001	3.6913
B-genome R2 & C	Meiotic gene promoters	233	5	6	0.3809	0.5191
B-genome R2 & C	Meiotic gene 5' ends	233	3	0	0.0625	-1.7298
B-genome R2 & C	Meiotic gene 3' ends	233	3	8	0.0193	2.5568
B-genome R2 & C	Meiotic gene terminators	233	5	10	0.0225	2.3036
B-genome R2 & C	CACTA	209947	16644	14959	0.0001	-8.9591
B-genome R2 & C	Harbinger	10869	263	280	0.1857	0.9523
B-genome R2 & C	hAT	296	6	7	0.4225	0.2927
B-genome R2 & C	Helitrons	226	6	7	0.3281	0.5597
B-genome R2 & C	Mariner	44018	441	979	0.0001	24.7586
B-genome R2 & C	Mutator	20882	520	960	0.0001	18.936
B-genome R2 & C	Unclassified class 2	3839	99	85	0.0833	-1.3988
B-genome R2 & C	Unclassified with TIRs	22357	298	709	0.0001	23.5271
B-genome R2 & C	Copia LTR	129516	15982	11948	0.0001	-21.6874
B-genome R2 & C	Gypsy LTR	398942	37512	31820	0.0001	-15.6519
B-genome R2 & C	LINE	25341	1008	863	0.0001	-4.6585
B-genome R2 & C	SINE	3067	29	18	0.0193	-2.1185
B-genome R2 & C	Unclassified LTR	40892	3604	2877	0.0001	-10.76
B-genome R2 & C	Unclassified repeats	47433	859	1911	0.0001	37.2092
D-genome R1 & R3	ASY1	54506	1009	5978	0.0001	42.5365
D-genome R1 & R3	H3K4me3	98360	2012	1172	0.0049	-3.5826
D-genome R1 & R3	H3K9me2	63998	1030	516	0.0001	-4.9203
D-genome R1 & R3	H3K27me1	100982	1311	2396	0.0001	7.6145
D-genome R1 & R3	H3K27me3	183410	3603	4772	0.0001	2.8133
D-genome R1 & R3	H3K36me3	72375	1424	1757	0.0001	2.1351
D-genome R1 & R3	H3K9ac	86042	1749	2358	0.0001	3.124
D-genome R1 & R3	H3K4me1	6820	146	484	0.0001	19.1212
D-genome R1 & R3	H3K27ac	31651	557	959	0.0001	6.3624
D-genome R1 & R3	MNase	277978	5295	3612	0.0049	-2.9261
D-genome R1 & R3	Genes	16349	1425	2055	0.0001	4.08
D-genome R1 & R3	Gene promoters	16349	567	1037	0.0001	7.0035
D-genome R1 & R3	Gene 5' ends	16349	364	297	0.0769	-1.515
D-genome R1 & R3	Gene 3' ends	16349	364	536	0.0001	3.818
D-genome R1 & R3	Gene terminators	16349	553	1161	0.0001	9.4023
D-genome R1 & R3	NLR-encoding genes	433	71	109	0.0001	3.5705
D-genome R1 & R3	NLR-encoding gene promoters	433	15	28	0.0001	2.8277
D-genome R1 & R3	NLR-encoding gene 5' ends	433	10	7	0.2017	-1.0089
D-genome R1 & R3	NLR-encoding gene 3' ends	433	10	12	0.2977	0.5543
D-genome R1 & R3	NLR-encoding gene terminators	433	16	18	0.3649	0.4957
D-genome R1 & R3	Meiotic genes	121	19	32	0.0001	2.8672
D-genome R1 & R3	Meiotic gene promoters	121	4	4	0.5776	-0.1875
D-genome R1 & R3	Meiotic gene 5' ends	121	3	1	0.2257	-1.0652
D-genome R1 & R3	Meiotic gene 3' ends	121	3	6	0.0337	2.1978
D-genome R1 & R3	Meiotic gene terminators	121	4	9	0.0337	2.281
D-genome R1 & R3	CACTA	86326	7791	7225	0.2145	-0.6545
D-genome R1 & R3	Harbinger	5305	208	194	0.3073	-0.526
D-genome R1 & R3	hAT	121	4	4	0.6016	-0.0632
D-genome R1 & R3	Helitrons	44	2	4	0.1185	1.5428
D-genome R1 & R3	Mariner	20197	278	694	0.0001	11.7733
D-genome R1 & R3	Mutator	11977	396	620	0.0001	4.6147
D-genome R1 & R3	Unclassified class 2	1056	21	35	0.0097	2.5362
D-genome R1 & R3	Unclassified with TIRs	12569	292	619	0.0001	8.6875
D-genome R1 & R3	Copia LTR	45816	7344	4626	0.0065	-3.4706
D-genome R1 & R3	Gypsy LTR	73051	10271	8204	0.0481	-1.8504
D-genome R1 & R3	LINE	12789	660	544	0.0961	-1.4821
D-genome R1 & R3	SINE	1048	14	12	0.4241	-0.3941
D-genome R1 & R3	Unclassified LTR	10710	1173	720	0.0065	-3.3598
D-genome R1 & R3	Unclassified repeats	27666	677	1273	0.0001	7.3093
D-genome R2 & C	ASY1	101767	1212	6716	0.0001	146.887
D-genome R2 & C	H3K4me3	74212	1010	684	0.0001	-10.245
D-genome R2 & C	H3K9me2	473135	5633	1885	0.0001	-40.0701
D-genome R2 & C	H3K27me1	524396	4386	7157	0.0001	33.7137
D-genome R2 & C	H3K27me3	160572	1728	2606	0.0001	21.1371
D-genome R2 & C	H3K36me3	170022	2072	2687	0.0001	12.3896
D-genome R2 & C	H3K9ac	144627	1761	2700	0.0001	22.0335
D-genome R2 & C	H3K4me1	14361	208	645	0.0001	29.1462
D-genome R2 & C	H3K27ac	60053	684	945	0.0001	9.3551
D-genome R2 & C	MNase	678095	8311	4825	0.0001	-29.638
D-genome R2 & C	Genes	17863	1256	2339	0.0001	29.6414
D-genome R2 & C	Gene promoters	17863	405	939	0.0001	25.7089
D-genome R2 & C	Gene 5' ends	17863	262	255	0.3425	-0.4145
D-genome R2 & C	Gene 3' ends	17863	257	528	0.0001	16.7055
D-genome R2 & C	Gene terminators	17863	393	994	0.0001	28.0268
D-genome R2 & C	NLR-encoding genes	63	7	9	0.2721	0.7167
D-genome R2 & C	NLR-encoding gene promoters	63	1	2	0.4369	0.4719
D-genome R2 & C	NLR-encoding gene 5' ends	63	1	1	0.6128	0.0855
D-genome R2 & C	NLR-encoding gene 3' ends	63	1	1	0.616	0.0226
D-genome R2 & C	NLR-encoding gene terminators	63	2	0	0.2513	-1.1443
D-genome R2 & C	Meiotic genes	228	29	57	0.0001	5.0812
D-genome R2 & C	Meiotic gene promoters	228	5	13	0.0001	3.4126
D-genome R2 & C	Meiotic gene 5' ends	228	3	1	0.1569	-1.2742
D-genome R2 & C	Meiotic gene 3' ends	228	3	6	0.1185	1.4774
D-genome R2 & C	Meiotic gene terminators	228	5	8	0.1633	1.1778
D-genome R2 & C	CACTA	204019	15426	12489	0.0001	-15.8713
D-genome R2 & C	Harbinger	9764	236	250	0.1985	0.9049
D-genome R2 & C	hAT	169	4	5	0.3193	0.6228
D-genome R2 & C	Helitrons	134	3	1	0.1393	-1.3272
D-genome R2 & C	Mariner	35845	399	817	0.0001	22.5841
D-genome R2 & C	Mutator	19306	469	821	0.0001	17.3943
D-genome R2 & C	Unclassified class 2	2391	63	67	0.3241	0.536
D-genome R2 & C	Unclassified with TIRs	20992	271	599	0.0001	19.7201
D-genome R2 & C	Copia LTR	103786	12797	9420	0.0001	-19.7308
D-genome R2 & C	Gypsy LTR	299469	28495	25257	0.0025	-10.2837
D-genome R2 & C	LINE	18709	759	677	0.0049	-2.8917
D-genome R2 & C	SINE	2483	26	15	0.0121	-2.0637
D-genome R2 & C	Unclassified LTR	32033	2845	2064	0.0001	-12.6902
D-genome R2 & C	Unclassified repeats	34606	612	1385	0.0001	31.2177

## Sheet: TableS3
Supplemental Table S3. Overlap of ASY1 peaks with other genomic features. ASY1 ChIP-seq peaks within distal compartments (R1 and R3; n=185,260) and within interstitial and proximal compartments (R2 and C; n=358,946) of each subgenome were evaluated for overlap with genomic features within other annotation categories using permutation tests implemented in the Bioconductor package regioneR v1.6.2 (…
Subgenome compartments	Feature	Feature number	Expected overlaps	Observed overlaps	P-value	Local Z-score
A-genome R1 & R3	DMC1	36030	1240	7259	0.0001	34.3972
A-genome R1 & R3	H3K4me3	110169	3978	2627	0.0289	-2.2866
A-genome R1 & R3	H3K9me2	64840	1810	1164	0.0097	-3.0584
A-genome R1 & R3	H3K27me1	118884	2641	4317	0.0001	5.3792
A-genome R1 & R3	H3K27me3	238270	7973	12992	0.0001	4.2011
A-genome R1 & R3	H3K36me3	95829	3210	4656	0.0001	3.2715
A-genome R1 & R3	H3K9ac	111121	3831	6579	0.0001	5.0565
A-genome R1 & R3	H3K4me1	7346	297	668	0.0001	8.5458
A-genome R1 & R3	H3K27ac	36579	1126	1689	0.0001	3.4754
A-genome R1 & R3	MNase	362386	12000	8947	0.0673	-1.8773
A-genome R1 & R3	Genes	17562	2803	3238	0.1393	1.0713
A-genome R1 & R3	Gene promoters	17562	1111	1746	0.0001	3.9217
A-genome R1 & R3	Gene 5' ends	17562	697	515	0.0577	-1.7453
A-genome R1 & R3	Gene 3' ends	17562	697	917	0.0001	2.1182
A-genome R1 & R3	Gene terminators	17562	1085	1969	0.0001	5.5888
A-genome R1 & R3	NLR-encoding genes	429	136	176	0.0289	1.5604
A-genome R1 & R3	NLR-encoding gene promoters	429	29	40	0.0769	1.4945
A-genome R1 & R3	NLR-encoding gene 5' ends	429	18	17	0.4369	-0.2827
A-genome R1 & R3	NLR-encoding gene 3' ends	429	19	29	0.0289	1.9385
A-genome R1 & R3	NLR-encoding gene terminators	429	29	41	0.0961	1.5096
A-genome R1 & R3	Meiotic genes	130	44	46	0.4577	0.2343
A-genome R1 & R3	Meiotic gene promoters	130	8	9	0.3841	0.3715
A-genome R1 & R3	Meiotic gene 5' ends	130	5	3	0.2705	-0.9157
A-genome R1 & R3	Meiotic gene 3' ends	130	5	5	0.5632	-0.0783
A-genome R1 & R3	Meiotic gene terminators	130	8	14	0.0577	1.8601
A-genome R1 & R3	CACTA	85877	13648	16028	0.0001	1.2678
A-genome R1 & R3	Harbinger	6341	451	448	0.4321	-0.039
A-genome R1 & R3	hAT	164	11	8	0.2817	-0.7767
A-genome R1 & R3	Helitrons	84	5	7	0.2497	0.9366
A-genome R1 & R3	Mariner	22211	538	1347	0.0001	10.3627
A-genome R1 & R3	Mutator	11986	722	1233	0.0001	5.0374
A-genome R1 & R3	Unclassified class 2	1032	47	54	0.2497	0.777
A-genome R1 & R3	Unclassified with TIRs	14865	620	1182	0.0001	6.0839
A-genome R1 & R3	Copia LTR	54587	17373	13176	0.0705	-1.8589
A-genome R1 & R3	Gypsy LTR	94759	26763	23711	0.1825	-0.9186
A-genome R1 & R3	LINE	15078	1499	1444	0.3361	-0.2701
A-genome R1 & R3	SINE	715	19	29	0.0289	2.0374
A-genome R1 & R3	Unclassified LTR	10663	2016	1721	0.1313	-1.1092
A-genome R1 & R3	Unclassified repeats	31093	1467	2489	0.0001	4.7341
A-genome R2 & C	DMC1	62945	1639	7663	0.0001	148.176
A-genome R2 & C	H3K4me3	70627	2045	1285	0.0001	-16.5736
A-genome R2 & C	H3K9me2	571716	13875	6121	0.0001	-49.757
A-genome R2 & C	H3K27me1	664077	10845	18082	0.0001	58.4358
A-genome R2 & C	H3K27me3	218202	4527	6843	0.0001	32.1885
A-genome R2 & C	H3K36me3	228917	5442	7032	0.0001	19.9312
A-genome R2 & C	H3K9ac	192787	4563	7292	0.0001	37.4409
A-genome R2 & C	H3K4me1	15885	503	954	0.0001	20.048
A-genome R2 & C	H3K27ac	72480	1679	1807	0.0001	3.0938
A-genome R2 & C	MNase	901489	22457	13656	0.0001	-41.3427
A-genome R2 & C	Genes	17783	2769	3574	0.0001	15.1341
A-genome R2 & C	Gene promoters	17783	868	1541	0.0001	22.2518
A-genome R2 & C	Gene 5' ends	17783	541	442	0.0001	-4.2915
A-genome R2 & C	Gene 3' ends	17783	537	867	0.0001	14.7
A-genome R2 & C	Gene terminators	17783	840	1696	0.0001	29.0919
A-genome R2 & C	NLR-encoding genes	48	11	12	0.4417	0.2148
A-genome R2 & C	NLR-encoding gene promoters	48	2	1	0.3313	-0.8147
A-genome R2 & C	NLR-encoding gene 5' ends	48	1	0	0.2449	-1.1415
A-genome R2 & C	NLR-encoding gene 3' ends	48	1	1	0.5896	-0.3711
A-genome R2 & C	NLR-encoding gene terminators	48	2	3	0.3865	0.4582
A-genome R2 & C	Meiotic genes	225	66	98	0.0001	3.9716
A-genome R2 & C	Meiotic gene promoters	225	11	26	0.0001	4.6383
A-genome R2 & C	Meiotic gene 5' ends	225	7	8	0.3769	0.4814
A-genome R2 & C	Meiotic gene 3' ends	225	7	11	0.0889	1.5592
A-genome R2 & C	Meiotic gene terminators	225	11	16	0.0937	1.41
A-genome R2 & C	CACTA	181976	32727	31418	0.0097	-4.0834
A-genome R2 & C	Harbinger	9421	481	557	0.0001	3.7924
A-genome R2 & C	hAT	244	14	13	0.4945	-0.2232
A-genome R2 & C	Helitrons	149	10	13	0.2017	0.9993
A-genome R2 & C	Mariner	33301	746	1470	0.0001	24.3876
A-genome R2 & C	Mutator	16736	877	1471	0.0001	18.5462
A-genome R2 & C	Unclassified class 2	2595	141	114	0.0241	-2.2736
A-genome R2 & C	Unclassified with TIRs	21053	642	1259	0.0001	24.498
A-genome R2 & C	Copia LTR	127775	39283	31743	0.0001	-19.1107
A-genome R2 & C	Gypsy LTR	418835	92563	86426	0.0097	-7.4931
A-genome R2 & C	LINE	19790	1854	1649	0.0001	-4.4517
A-genome R2 & C	SINE	1669	38	38	0.544	0.0076
A-genome R2 & C	Unclassified LTR	34536	6949	6062	0.0001	-8.9592
A-genome R2 & C	Unclassified repeats	34078	1392	2487	0.0001	27.0773
B-genome R1 & R3	DMC1	35242	1042	7316	0.0001	37.4084
B-genome R1 & R3	H3K4me3	119854	3588	2573	0.0625	-1.6479
B-genome R1 & R3	H3K9me2	66934	1654	1051	0.0049	-3.4036
B-genome R1 & R3	H3K27me1	114580	2297	3855	0.0001	5.8214
B-genome R1 & R3	H3K27me3	259402	7110	12684	0.0001	4.3895
B-genome R1 & R3	H3K36me3	101796	2870	4533	0.0001	3.9037
B-genome R1 & R3	H3K9ac	116838	3367	6434	0.0001	5.8378
B-genome R1 & R3	H3K4me1	6867	230	725	0.0001	12.7551
B-genome R1 & R3	H3K27ac	35534	936	1706	0.0001	5.442
B-genome R1 & R3	MNase	411361	11525	8356	0.0385	-1.9061
B-genome R1 & R3	Genes	15645	2200	2847	0.0001	1.9121
B-genome R1 & R3	Gene promoters	15645	847	1414	0.0001	4.2813
B-genome R1 & R3	Gene 5' ends	15645	539	454	0.1393	-0.9861
B-genome R1 & R3	Gene 3' ends	15645	538	792	0.0001	2.9967
B-genome R1 & R3	Gene terminators	15645	833	1652	0.0001	6.1902
B-genome R1 & R3	NLR-encoding genes	500	134	197	0.0001	2.0848
B-genome R1 & R3	NLR-encoding gene promoters	500	26	37	0.0913	1.3733
B-genome R1 & R3	NLR-encoding gene 5' ends	500	17	19	0.3841	0.3221
B-genome R1 & R3	NLR-encoding gene 3' ends	500	16	31	0.0049	2.9551
B-genome R1 & R3	NLR-encoding gene terminators	500	27	39	0.0481	1.7028
B-genome R1 & R3	Meiotic genes	122	30	31	0.4529	0.1205
B-genome R1 & R3	Meiotic gene promoters	122	7	9	0.2449	0.8711
B-genome R1 & R3	Meiotic gene 5' ends	122	4	2	0.2801	-0.9426
B-genome R1 & R3	Meiotic gene 3' ends	122	4	7	0.1409	1.4356
B-genome R1 & R3	Meiotic gene terminators	122	7	13	0.0385	2.3229
B-genome R1 & R3	CACTA	100279	14773	17753	0.0001	1.4458
B-genome R1 & R3	Harbinger	6188	372	402	0.3169	0.5849
B-genome R1 & R3	hAT	170	7	10	0.1953	1.0544
B-genome R1 & R3	Helitrons	81	4	1	0.1281	-1.2713
B-genome R1 & R3	Mariner	25382	544	1385	0.0001	10.058
B-genome R1 & R3	Mutator	12775	667	1240	0.0001	5.6445
B-genome R1 & R3	Unclassified class 2	1396	71	72	0.4961	0.0753
B-genome R1 & R3	Unclassified with TIRs	13945	526	970	0.0001	5.1977
B-genome R1 & R3	Copia LTR	51848	14185	11231	0.0801	-1.6027
B-genome R1 & R3	Gypsy LTR	95275	23011	19436	0.1057	-1.2424
B-genome R1 & R3	LINE	15831	1369	1383	0.5504	0.0703
B-genome R1 & R3	SINE	1042	27	23	0.2849	-0.6964
B-genome R1 & R3	Unclassified LTR	12856	2329	2071	0.1729	-0.8298
B-genome R1 & R3	Unclassified repeats	54915	1714	2969	0.0001	5.4623
B-genome R2 & C	DMC1	59279	1359	8010	0.0001	184.649
B-genome R2 & C	H3K4me3	92144	2253	1485	0.0001	-17.5241
B-genome R2 & C	H3K9me2	570004	12134	5223	0.0001	-53.952
B-genome R2 & C	H3K27me1	653029	9556	16021	0.0001	64.7652
B-genome R2 & C	H3K27me3	271205	5088	8606	0.0001	50.9021
B-genome R2 & C	H3K36me3	259535	5442	7625	0.0001	28.9627
B-genome R2 & C	H3K9ac	225587	4719	8147	0.0001	50.9712
B-genome R2 & C	H3K4me1	16893	447	1311	0.0001	40.6089
B-genome R2 & C	H3K27ac	76287	1556	2108	0.0001	13.9505
B-genome R2 & C	MNase	1024876	22273	12584	0.0001	-60.7082
B-genome R2 & C	Genes	19997	2667	3654	0.0001	18.7361
B-genome R2 & C	Gene promoters	19997	842	1551	0.0001	24.3059
B-genome R2 & C	Gene 5' ends	19997	531	462	0.0001	-3.0103
B-genome R2 & C	Gene 3' ends	19997	523	837	0.0001	13.5293
B-genome R2 & C	Gene terminators	19997	816	1680	0.0001	29.6367
B-genome R2 & C	NLR-encoding genes	78	15	23	0.0433	2.0157
B-genome R2 & C	NLR-encoding gene promoters	78	3	7	0.0313	2.1883
B-genome R2 & C	NLR-encoding gene 5' ends	78	2	1	0.3817	-0.7499
B-genome R2 & C	NLR-encoding gene 3' ends	78	2	4	0.1489	1.3121
B-genome R2 & C	NLR-encoding gene terminators	78	3	3	0.5848	-0.2195
B-genome R2 & C	Meiotic genes	233	60	82	0.0073	2.7594
B-genome R2 & C	Meiotic gene promoters	233	10	25	0.0001	4.6088
B-genome R2 & C	Meiotic gene 5' ends	233	6	3	0.1273	-1.3269
B-genome R2 & C	Meiotic gene 3' ends	233	6	9	0.1969	1.1029
B-genome R2 & C	Meiotic gene terminators	233	10	12	0.2921	0.6763
B-genome R2 & C	CACTA	209947	33943	32574	0.0001	-8.8945
B-genome R2 & C	Harbinger	10869	527	562	0.0769	1.6272
B-genome R2 & C	hAT	296	12	11	0.4897	-0.1881
B-genome R2 & C	Helitrons	226	11	11	0.5536	-0.0705
B-genome R2 & C	Mariner	44018	856	1748	0.0001	29.8701
B-genome R2 & C	Mutator	20882	1049	1723	0.0001	21.1816
B-genome R2 & C	Unclassified class 2	3839	199	183	0.1457	-1.1352
B-genome R2 & C	Unclassified with TIRs	22357	591	1232	0.0001	27.0675
B-genome R2 & C	Copia LTR	129516	32667	26169	0.0001	-41.3896
B-genome R2 & C	Gypsy LTR	398942	76671	68013	0.0001	-49.0696
B-genome R2 & C	LINE	25341	2041	1839	0.0001	-4.8395
B-genome R2 & C	SINE	3067	57	58	0.4369	0.1944
B-genome R2 & C	Unclassified LTR	40892	7361	6768	0.0001	-7.2336
B-genome R2 & C	Unclassified repeats	47433	1729	3314	0.0001	36.3686
D-genome R1 & R3	DMC1	29804	1000	6032	0.0001	38.5689
D-genome R1 & R3	H3K4me3	98360	3482	2121	0.0049	-2.949
D-genome R1 & R3	H3K9me2	63998	1809	1055	0.0049	-3.8506
D-genome R1 & R3	H3K27me1	100982	2283	3892	0.0001	6.1835
D-genome R1 & R3	H3K27me3	183410	6186	9603	0.0001	4.11
D-genome R1 & R3	H3K36me3	72375	2494	3245	0.0001	2.4452
D-genome R1 & R3	H3K9ac	86042	3048	4819	0.0001	4.6121
D-genome R1 & R3	H3K4me1	6820	257	651	0.0001	12.1734
D-genome R1 & R3	H3K27ac	31651	969	1540	0.0001	4.632
D-genome R1 & R3	MNase	277978	9188	6756	0.0433	-2.1798
D-genome R1 & R3	Genes	16349	2542	2821	0.2305	0.9039
D-genome R1 & R3	Gene promoters	16349	1006	1531	0.0001	4.1847
D-genome R1 & R3	Gene 5' ends	16349	638	437	0.0289	-2.4683
D-genome R1 & R3	Gene 3' ends	16349	633	835	0.0001	2.466
D-genome R1 & R3	Gene terminators	16349	979	1749	0.0001	6.0876
D-genome R1 & R3	NLR-encoding genes	433	125	144	0.1585	0.9977
D-genome R1 & R3	NLR-encoding gene promoters	433	28	45	0.0049	2.5644
D-genome R1 & R3	NLR-encoding gene 5' ends	433	17	13	0.1969	-0.8705
D-genome R1 & R3	NLR-encoding gene 3' ends	433	17	29	0.0049	2.5222
D-genome R1 & R3	NLR-encoding gene terminators	433	27	39	0.0337	1.8569
D-genome R1 & R3	Meiotic genes	121	34	41	0.1825	1.0121
D-genome R1 & R3	Meiotic gene promoters	121	8	11	0.1297	1.342
D-genome R1 & R3	Meiotic gene 5' ends	121	5	2	0.1489	-1.2944
D-genome R1 & R3	Meiotic gene 3' ends	121	5	7	0.2449	0.8671
D-genome R1 & R3	Meiotic gene terminators	121	8	8	0.5424	0.0896
D-genome R1 & R3	CACTA	86326	13950	14461	0.4209	0.292
D-genome R1 & R3	Harbinger	5305	366	359	0.4129	-0.1279
D-genome R1 & R3	hAT	121	8	11	0.1761	1.0667
D-genome R1 & R3	Helitrons	44	3	4	0.3649	0.4383
D-genome R1 & R3	Mariner	20197	479	1029	0.0001	8.627
D-genome R1 & R3	Mutator	11977	698	1028	0.0001	3.4737
D-genome R1 & R3	Unclassified class 2	1056	37	39	0.4001	0.3042
D-genome R1 & R3	Unclassified with TIRs	12569	511	967	0.0001	6.731
D-genome R1 & R3	Copia LTR	45816	13192	9650	0.0449	-2.2425
D-genome R1 & R3	Gypsy LTR	73051	18536	16893	0.1953	-0.7421
D-genome R1 & R3	LINE	12789	1178	1093	0.2401	-0.5665
D-genome R1 & R3	SINE	1048	23	21	0.3553	-0.4483
D-genome R1 & R3	Unclassified LTR	10710	2108	1821	0.1281	-1.1183
D-genome R1 & R3	Unclassified repeats	27666	1191	2073	0.0001	5.5629
D-genome R2 & C	DMC1	48425	1224	6738	0.0001	146.755
D-genome R2 & C	H3K4me3	74212	2008	1150	0.0001	-16.5623
D-genome R2 & C	H3K9me2	473135	11139	4470	0.0001	-35.6979
D-genome R2 & C	H3K27me1	524396	8389	14158	0.0001	44.0633
D-genome R2 & C	H3K27me3	160572	3382	5589	0.0001	32.8481
D-genome R2 & C	H3K36me3	170022	4084	5253	0.0001	13.8336
D-genome R2 & C	H3K9ac	144627	3468	5783	0.0001	32.8388
D-genome R2 & C	H3K4me1	14361	411	898	0.0001	23.2922
D-genome R2 & C	H3K27ac	60053	1341	1629	0.0001	7.0224
D-genome R2 & C	MNase	678095	16462	10015	0.0001	-26.5639
D-genome R2 & C	Genes	17863	2607	3304	0.0001	11.9776
D-genome R2 & C	Gene promoters	17863	820	1529	0.0001	22.6438
D-genome R2 & C	Gene 5' ends	17863	518	409	0.0001	-4.3642
D-genome R2 & C	Gene 3' ends	17863	510	817	0.0001	12.9141
D-genome R2 & C	Gene terminators	17863	797	1653	0.0001	28.9564
D-genome R2 & C	NLR-encoding genes	63	15	15	0.5424	0.0563
D-genome R2 & C	NLR-encoding gene promoters	63	3	3	0.5808	0.0055
D-genome R2 & C	NLR-encoding gene 5' ends	63	2	3	0.3441	0.6773
D-genome R2 & C	NLR-encoding gene 3' ends	63	2	4	0.1217	1.5273
D-genome R2 & C	NLR-encoding gene terminators	63	3	5	0.1889	1.2077
D-genome R2 & C	Meiotic genes	228	62	75	0.0865	1.5576
D-genome R2 & C	Meiotic gene promoters	228	10	19	0.0161	2.6616
D-genome R2 & C	Meiotic gene 5' ends	228	6	3	0.1089	-1.347
D-genome R2 & C	Meiotic gene 3' ends	228	7	11	0.1089	1.4643
D-genome R2 & C	Meiotic gene terminators	228	11	27	0.0001	4.6409
D-genome R2 & C	CACTA	204019	32270	28534	0.0017	-9.4629
D-genome R2 & C	Harbinger	9764	481	533	0.0145	2.2975
D-genome R2 & C	hAT	169	8	10	0.2417	0.8182
D-genome R2 & C	Helitrons	134	7	4	0.1537	-1.1516
D-genome R2 & C	Mariner	35845	784	1405	0.0001	20.8131
D-genome R2 & C	Mutator	19306	955	1506	0.0001	16.5394
D-genome R2 & C	Unclassified class 2	2391	129	144	0.0673	1.3691
D-genome R2 & C	Unclassified with TIRs	20992	539	1092	0.0001	22.4049
D-genome R2 & C	Copia LTR	103786	26752	20776	0.0001	-16.5876
D-genome R2 & C	Gypsy LTR	299469	59647	55363	0.0113	-5.9489
D-genome R2 & C	LINE	18709	1568	1425	0.0113	-3.2538
D-genome R2 & C	SINE	2483	52	49	0.3857	-0.329
D-genome R2 & C	Unclassified LTR	32033	5929	5174	0.0017	-7.4596
D-genome R2 & C	Unclassified repeats	34606	1239	2366	0.0001	32.2399

## Sheet: TableS4
Supplemental Table S4. Gene ontology (GO) term enrichment analysis of genes grouped by decreasing crossover rate. Genes grouped into four quantiles defined by decreasing crossover rate (cM/Mb) (across all subgenomes or within each subgenome) were analyzed for enrichment of “biological process” GO terms, relative to their representation among all genes in the genome or the corresponding subgenome,…
Subgenome	cM/Mb gene quantile	GO ID	GO term	Annotated genes in subgenome	Expected genes in quantile	Observed genes in quantile	P-value
All	Quantile 1	GO:0009626	plant-type hypersensitive response	5684	1361.92	1852	1e-30
All	Quantile 1	GO:0006952	defense response	19730	4727.43	5840	1e-30
All	Quantile 1	GO:0006468	protein phosphorylation	7806	1870.36	2146	1e-30
All	Quantile 1	GO:0007165	signal transduction	14964	3585.47	3685	1e-30
All	Quantile 1	GO:0006915	apoptotic process	1013	242.72	397	2.4e-30
All	Quantile 1	GO:0050832	defense response to fungus	6917	1657.36	2138	3e-29
All	Quantile 1	GO:0009814	defense response, incompatible interaction	7882	1888.57	2494	1.2e-28
All	Quantile 1	GO:0046713	borate transport	337	80.75	167	3.3e-25
All	Quantile 1	GO:2000280	regulation of root development	913	218.76	335	6.1e-23
All	Quantile 1	GO:0033609	oxalate metabolic process	200	47.92	108	5.2e-20
All	Quantile 1	GO:0055114	oxidation-reduction process	9152	2192.87	2393	1e-19
All	Quantile 1	GO:0009611	response to wounding	5796	1388.76	1703	1.5e-18
All	Quantile 1	GO:0009817	defense response to fungus, incompatible interaction	1030	246.79	372	3.4e-18
All	Quantile 1	GO:0009625	response to insect	839	201.03	312	6e-18
All	Quantile 1	GO:0010497	plasmodesmata-mediated intercellular transport	219	52.47	111	1.1e-17
All	Quantile 1	GO:0009759	indole glucosinolate biosynthetic process	524	125.55	209	4.2e-16
All	Quantile 1	GO:0080110	sporopollenin biosynthetic process	646	154.79	246	7.7e-16
All	Quantile 1	GO:0009627	systemic acquired resistance	5436	1302.5	1672	2.1e-15
All	Quantile 1	GO:0042351	'de novo' GDP-L-fucose biosynthetic process	105	25.16	63	3.8e-15
All	Quantile 1	GO:0040009	regulation of growth rate	492	117.89	196	3.8e-15
All	Quantile 1	GO:0000162	tryptophan biosynthetic process	567	135.86	219	5e-15
All	Quantile 1	GO:0009629	response to gravity	1364	326.82	310	2.8e-14
All	Quantile 1	GO:0046622	positive regulation of organ growth	482	115.49	189	6.8e-14
All	Quantile 1	GO:0051792	medium-chain fatty acid biosynthetic process	482	115.49	189	6.8e-14
All	Quantile 1	GO:0009682	induced systemic resistance	956	229.06	300	8.6e-14
All	Quantile 1	GO:0010025	wax biosynthetic process	366	87.7	141	1.6e-13
All	Quantile 1	GO:0006511	ubiquitin-dependent protein catabolic process	3354	803.64	854	2.3e-13
All	Quantile 1	GO:0031348	negative regulation of defense response	3647	873.84	1035	7.1e-13
All	Quantile 1	GO:0009813	flavonoid biosynthetic process	2631	630.4	788	7.9e-13
All	Quantile 1	GO:0071249	cellular response to nitrate	82	19.65	50	1.1e-12
All	Quantile 1	GO:0009862	systemic acquired resistance, salicylic acid mediated signaling pathway	2187	524.02	666	1.3e-12
All	Quantile 1	GO:0010112	regulation of systemic acquired resistance	638	152.87	228	1.9e-12
All	Quantile 1	GO:0009805	coumarin biosynthetic process	774	185.46	271	2.6e-12
All	Quantile 1	GO:0010082	regulation of root meristem growth	287	68.77	122	3.4e-12
All	Quantile 1	GO:0048437	floral organ development	4349	1042.05	1053	4.1e-12
All	Quantile 1	GO:0010224	response to UV-B	2427	581.52	726	5.9e-12
All	Quantile 1	GO:0016045	detection of bacterium	944	226.19	317	1.3e-11
All	Quantile 1	GO:0009715	chalcone biosynthetic process	55	13.18	37	1.3e-11
All	Quantile 1	GO:0010338	leaf formation	507	121.48	189	1.4e-11
All	Quantile 1	GO:0006744	ubiquinone biosynthetic process	610	146.16	219	1.8e-11
All	Quantile 1	GO:0048830	adventitious root development	536	128.43	197	2.2e-11
All	Quantile 1	GO:0016106	sesquiterpenoid biosynthetic process	343	82.18	100	6.6e-11
All	Quantile 1	GO:0002229	defense response to oomycetes	760	182.1	262	6.7e-11
All	Quantile 1	GO:0052544	defense response by callose deposition in cell wall	1652	395.83	506	2.5e-10
All	Quantile 1	GO:0080167	response to karrikin	2819	675.45	817	2.8e-10
All	Quantile 1	GO:0070988	demethylation	126	30.19	47	5.7e-10
All	Quantile 1	GO:0010120	camalexin biosynthetic process	657	157.42	227	5.7e-10
All	Quantile 1	GO:0006569	tryptophan catabolic process	947	226.91	309	7.7e-10
All	Quantile 1	GO:0042631	cellular response to water deprivation	1610	385.77	491	9e-10
All	Quantile 1	GO:0016099	monoterpenoid biosynthetic process	22	5.27	19	1.1e-09
All	Quantile 1	GO:0048316	seed development	6652	1593.86	1669	3.5e-09
All	Quantile 1	GO:0015706	nitrate transport	1980	474.42	577	6.2e-09
All	Quantile 1	GO:0010114	response to red light	1386	332.09	402	1e-08
All	Quantile 1	GO:0042593	glucose homeostasis	106	25.4	28	1.5e-08
All	Quantile 1	GO:0010363	regulation of plant-type hypersensitive response	3289	788.06	920	1.8e-08
All	Quantile 1	GO:0009641	shade avoidance	605	144.96	205	2.1e-08
All	Quantile 1	GO:0002237	response to molecule of bacterial origin	779	186.65	252	3.4e-08
All	Quantile 1	GO:0009694	jasmonic acid metabolic process	1074	257.34	275	4.6e-08
All	Quantile 1	GO:0080027	response to herbivore	215	51.52	87	6.1e-08
All	Quantile 1	GO:0071289	cellular response to nickel ion	76	18.21	40	6.6e-08
All	Quantile 1	GO:0009809	lignin biosynthetic process	1221	292.56	346	8.3e-08
All	Quantile 1	GO:0009684	indoleacetic acid biosynthetic process	1039	248.95	322	1.2e-07
All	Quantile 1	GO:0019745	pentacyclic triterpenoid biosynthetic process	135	32.35	60	1.4e-07
All	Quantile 1	GO:0031396	regulation of protein ubiquitination	355	85.06	125	1.5e-07
All	Quantile 1	GO:0042177	negative regulation of protein catabolic process	156	37.38	65	2.6e-07
All	Quantile 1	GO:0030639	polyketide biosynthetic process	45	10.78	27	2.7e-07
All	Quantile 1	GO:0009733	response to auxin	3920	939.26	957	2.9e-07
All	Quantile 1	GO:0010951	negative regulation of endopeptidase activity	246	58.94	92	3.1e-07
All	Quantile 1	GO:0030187	melatonin biosynthetic process	148	35.46	63	4.7e-07
All	Quantile 1	GO:0048527	lateral root development	2096	502.21	602	5.7e-07
All	Quantile 1	GO:0009816	defense response to bacterium, incompatible interaction	1435	343.83	422	8.3e-07
All	Quantile 1	GO:2000083	negative regulation of L-ascorbic acid biosynthetic process	289	69.25	106	8.7e-07
All	Quantile 1	GO:0015824	proline transport	563	134.9	185	1e-06
All	Quantile 1	GO:0045493	xylan catabolic process	127	30.43	55	1.3e-06
All	Quantile 1	GO:0001732	formation of cytoplasmic translation initiation complex	14	3.35	12	2e-06
All	Quantile 1	GO:0000160	phosphorelay signal transduction system	1884	451.42	502	4.2e-06
All	Quantile 1	GO:0009686	gibberellin biosynthetic process	427	102.31	148	4.4e-06
All	Quantile 1	GO:0032259	methylation	2994	717.38	661	5.1e-06
All	Quantile 1	GO:0002213	defense response to insect	370	88.65	119	5.1e-06
All	Quantile 1	GO:0009409	response to cold	10088	2417.15	2372	5.4e-06
All	Quantile 1	GO:0042742	defense response to bacterium	6869	1645.85	1892	7.1e-06
All	Quantile 1	GO:0051762	sesquiterpene biosynthetic process	43	10.3	24	7.3e-06
All	Quantile 1	GO:0010231	maintenance of seed dormancy	644	154.31	204	7.7e-06
All	Quantile 1	GO:2000071	regulation of defense response by callose deposition	79	18.93	37	7.7e-06
All	Quantile 1	GO:0060416	response to growth hormone	172	41.21	67	8.7e-06
All	Quantile 1	GO:0008284	positive regulation of cell proliferation	708	169.64	220	9e-06
All	Quantile 1	GO:0006865	amino acid transport	1495	358.21	430	9.6e-06
All	Quantile 1	GO:0000041	transition metal ion transport	1329	318.44	351	1.1e-05
All	Quantile 1	GO:0031640	killing of cells of other organism	101	24.2	44	1.2e-05
All	Quantile 1	GO:0080148	negative regulation of response to water deprivation	193	46.24	73	1.2e-05
All	Quantile 1	GO:0009646	response to absence of light	545	130.59	175	1.4e-05
All	Quantile 1	GO:0010311	lateral root formation	694	166.29	215	1.4e-05
All	Quantile 1	GO:0009561	megagametogenesis	1599	383.13	414	1.6e-05
All	Quantile 1	GO:0010260	animal organ senescence	212	50.8	78	2e-05
All	Quantile 1	GO:0009859	pollen hydration	12	2.88	10	2.5e-05
All	Quantile 1	GO:0045338	farnesyl diphosphate metabolic process	63	15.1	26	2.9e-05
All	Quantile 1	GO:0051555	flavonol biosynthetic process	594	142.33	178	3.1e-05
All	Quantile 1	GO:0010310	regulation of hydrogen peroxide metabolic process	1026	245.84	303	3.7e-05
All	Quantile 1	GO:0071370	cellular response to gibberellin stimulus	575	137.77	173	4.9e-05
All	Quantile 1	GO:0007133	meiotic anaphase I	19	4.55	13	5.2e-05
All	Quantile 1	GO:0030497	fatty acid elongation	24	5.75	15	6.6e-05
All	Quantile 1	GO:0010106	cellular response to iron ion starvation	984	235.77	288	7.1e-05
All	Quantile 1	GO:0002679	respiratory burst involved in defense response	1140	273.15	329	7.5e-05
All	Quantile 1	GO:0006801	superoxide metabolic process	95	22.76	22	7.6e-05
All	Quantile 1	GO:0010439	regulation of glucosinolate biosynthetic process	80	19.17	35	7.9e-05
All	Quantile 1	GO:0071836	nectar secretion	96	23	40	9.6e-05
All	Quantile 1	GO:0007606	sensory perception of chemical stimulus	20	4.79	13	0.00012
All	Quantile 1	GO:0019953	sexual reproduction	2964	710.19	728	0.00012
All	Quantile 1	GO:0010023	proanthocyanidin biosynthetic process	170	40.73	62	0.00012
All	Quantile 1	GO:0035336	long-chain fatty-acyl-CoA metabolic process	30	7.19	17	0.00012
All	Quantile 1	GO:0080187	floral organ senescence	165	39.54	61	0.00013
All	Quantile 1	GO:0010466	negative regulation of peptidase activity	328	78.59	127	0.00014
All	Quantile 1	GO:0006857	oligopeptide transport	666	159.58	188	0.00015
All	Quantile 1	GO:0071472	cellular response to salt stress	1096	262.61	319	0.00015
All	Quantile 1	GO:0009704	de-etiolation	231	55.35	80	0.00017
All	Quantile 1	GO:0009617	response to bacterium	8448	2024.19	2332	0.00017
All	Quantile 1	GO:0009643	photosynthetic acclimation	127	30.43	49	0.00017
All	Quantile 1	GO:0036172	thiamine salvage	6	1.44	6	0.00019
All	Quantile 1	GO:0042128	nitrate assimilation	276	66.13	90	0.00022
All	Quantile 1	GO:0009615	response to virus	2235	535.52	568	0.00026
All	Quantile 1	GO:0006580	ethanolamine metabolic process	12	2.88	9	0.00028
All	Quantile 1	GO:0002188	translation reinitiation	8	1.92	7	0.00029
All	Quantile 1	GO:0009871	jasmonic acid and ethylene-dependent systemic resistance, ethylene mediated signaling pathway	70	16.77	30	0.00038
All	Quantile 1	GO:0009851	auxin biosynthetic process	1168	279.86	364	0.00044
All	Quantile 1	GO:0051238	sequestering of metal ion	173	41.45	47	0.00052
All	Quantile 1	GO:0009861	jasmonic acid and ethylene-dependent systemic resistance	283	67.81	106	0.0006
All	Quantile 1	GO:0009697	salicylic acid biosynthetic process	1043	249.91	295	0.00075
All	Quantile 1	GO:0002221	pattern recognition receptor signaling pathway	547	131.06	163	0.00075
All	Quantile 1	GO:0031540	regulation of anthocyanin biosynthetic process	108	25.88	41	0.00081
All	Quantile 1	GO:0003156	regulation of animal organ formation	95	22.76	37	0.00082
All	Quantile 1	GO:0010045	response to nickel cation	618	148.08	202	0.00085
All	Quantile 1	GO:0006527	arginine catabolic process	20	4.79	11	0.00088
All	Quantile 1	GO:1990169	stress response to copper ion	70	16.77	29	0.00093
All	Quantile 1	GO:0016124	xanthophyll catabolic process	26	6.23	14	0.00098
All	Quantile 1	GO:0006598	polyamine catabolic process	171	40.97	61	0.00099
All	Quantile 1	GO:0006855	drug transmembrane transport	519	124.36	147	0.00099
All	Quantile 1	GO:0000165	MAPK cascade	1323	317	347	0.00101
All	Quantile 1	GO:0045487	gibberellin catabolic process	49	11.74	22	0.00105
All	Quantile 1	GO:0045926	negative regulation of growth	932	223.31	251	0.00114
All	Quantile 1	GO:0006182	cGMP biosynthetic process	553	132.5	164	0.00121
All	Quantile 1	GO:0030418	nicotianamine biosynthetic process	32	7.67	16	0.00124
All	Quantile 1	GO:1900459	positive regulation of brassinosteroid mediated signaling pathway	546	130.82	162	0.00126
All	Quantile 1	GO:0009831	plant-type cell wall modification involved in multidimensional cell growth	217	51.99	72	0.00132
All	Quantile 1	GO:0042353	fucose biosynthetic process	55	13.18	28	0.00132
All	Quantile 1	GO:0016567	protein ubiquitination	4389	1051.63	1144	0.00132
All	Quantile 1	GO:0046741	transport of virus in host, tissue to tissue	24	5.75	13	0.00138
All	Quantile 1	GO:0009826	unidimensional cell growth	3880	929.67	888	0.00141
All	Quantile 1	GO:0010256	endomembrane system organization	1613	386.48	371	0.00154
All	Quantile 1	GO:0009555	pollen development	4400	1054.27	1185	0.00162
All	Quantile 1	GO:0009653	anatomical structure morphogenesis	10396	2490.94	2410	0.00165
All	Quantile 1	GO:0000038	very long-chain fatty acid metabolic process	375	89.85	111	0.00171
All	Quantile 1	GO:0009631	cold acclimation	501	120.04	149	0.00173
All	Quantile 1	GO:0010075	regulation of meristem growth	1908	457.17	557	0.00187
All	Quantile 1	GO:0009628	response to abiotic stimulus	27136	6501.95	6682	0.00189
All	Quantile 1	GO:0010623	programmed cell death involved in cell development	159	38.1	57	0.00194
All	Quantile 1	GO:0009740	gibberellic acid mediated signaling pathway	541	129.63	155	0.00238
All	Quantile 1	GO:0090059	protoxylem development	61	14.62	25	0.00242
All	Quantile 1	GO:0007029	endoplasmic reticulum organization	83	19.89	28	0.00242
All	Quantile 1	GO:0010304	PSII associated light-harvesting complex II catabolic process	87	20.85	33	0.00254
All	Quantile 1	GO:0098656	anion transmembrane transport	2074	496.94	509	0.00269
All	Quantile 1	GO:0051502	diterpene phytoalexin biosynthetic process	19	4.55	8	0.00269
All	Quantile 1	GO:0006005	L-fucose biosynthetic process	20	4.79	11	0.00275
All	Quantile 1	GO:0090358	positive regulation of tryptophan metabolic process	20	4.79	11	0.00275
All	Quantile 1	GO:0019605	butyrate metabolic process	34	8.15	16	0.00275
All	Quantile 1	GO:0090355	positive regulation of auxin metabolic process	35	8.39	13	0.00275
All	Quantile 1	GO:0010167	response to nitrate	1358	325.39	398	0.00292
All	Quantile 1	GO:0010585	glutamine secretion	15	3.59	9	0.00307
All	Quantile 1	GO:0045792	negative regulation of cell size	15	3.59	9	0.00307
All	Quantile 1	GO:0080143	regulation of amino acid export	15	3.59	9	0.00307
All	Quantile 1	GO:0006749	glutathione metabolic process	351	84.1	106	0.00342
All	Quantile 1	GO:0042398	cellular modified amino acid biosynthetic process	289	69.25	83	0.00353
All	Quantile 1	GO:0009636	response to toxic substance	3856	923.92	961	0.00372
All	Quantile 1	GO:0009446	putrescine biosynthetic process	19	4.55	9	0.00379
All	Quantile 1	GO:0006336	DNA replication-independent nucleosome assembly	11	2.64	7	0.00379
All	Quantile 1	GO:0019521	D-gluconate metabolic process	7	1.68	6	0.00379
All	Quantile 1	GO:0005996	monosaccharide metabolic process	2453	587.75	574	0.00381
All	Quantile 1	GO:0070291	N-acylethanolamine metabolic process	13	3.11	8	0.00426
All	Quantile 1	GO:0006809	nitric oxide biosynthetic process	21	5.03	11	0.00453
All	Quantile 1	GO:0005985	sucrose metabolic process	230	55.11	60	0.00473
All	Quantile 1	GO:0009308	amine metabolic process	1981	474.66	600	0.00529
All	Quantile 1	GO:0009415	response to water	7157	1714.86	1738	0.00584
All	Quantile 1	GO:0050667	homocysteine metabolic process	19	4.55	8	0.00588
All	Quantile 1	GO:0002215	defense response to nematode	144	34.5	48	0.00688
All	Quantile 1	GO:0051607	defense response to virus	1757	420.99	422	0.00715
All	Quantile 1	GO:0010447	response to acidic pH	43	10.3	18	0.0072
All	Quantile 1	GO:0015770	sucrose transport	88	21.09	33	0.00758
All	Quantile 1	GO:0080028	nitrile biosynthetic process	34	8.15	15	0.00777
All	Quantile 1	GO:0016121	carotene catabolic process	31	7.43	14	0.00781
All	Quantile 1	GO:0006083	acetate metabolic process	40	9.58	16	0.00781
All	Quantile 1	GO:0009828	plant-type cell wall loosening	228	54.63	71	0.00804
All	Quantile 1	GO:0009086	methionine biosynthetic process	448	107.34	128	0.00835
All	Quantile 1	GO:0006949	syncytium formation	201	48.16	62	0.00864
All	Quantile 1	GO:0010286	heat acclimation	1672	400.62	434	0.00979
All	Quantile 1	GO:0009411	response to UV	3322	795.97	943	0.00992
All	Quantile 1	GO:0010371	regulation of gibberellin biosynthetic process	81	19.41	28	0.01002
All	Quantile 1	GO:0045226	extracellular polysaccharide biosynthetic process	54	12.94	18	0.01031
All	Quantile 1	GO:0008202	steroid metabolic process	1627	389.84	446	0.01063
All	Quantile 1	GO:0048730	epidermis morphogenesis	23	5.51	11	0.01073
All	Quantile 1	GO:0080036	regulation of cytokinin-activated signaling pathway	52	12.46	20	0.01087
All	Quantile 1	GO:0007021	tubulin complex assembly	29	6.95	13	0.011
All	Quantile 1	GO:0070413	trehalose metabolism in response to stress	29	6.95	13	0.011
All	Quantile 1	GO:0009790	embryo development	4280	1025.51	996	0.01118
All	Quantile 1	GO:0006659	phosphatidylserine biosynthetic process	12	2.88	7	0.0112
All	Quantile 1	GO:0009432	SOS response	12	2.88	7	0.0112
All	Quantile 1	GO:0050732	negative regulation of peptidyl-tyrosine phosphorylation	12	2.88	7	0.0112
All	Quantile 1	GO:0099636	cytoplasmic streaming	12	2.88	7	0.0112
All	Quantile 1	GO:0006979	response to oxidative stress	6358	1523.42	1591	0.01125
All	Quantile 1	GO:0009812	flavonoid metabolic process	2847	682.16	842	0.01138
All	Quantile 1	GO:0009311	oligosaccharide metabolic process	1034	247.75	250	0.01139
All	Quantile 1	GO:0009835	fruit ripening	123	29.47	41	0.01178
All	Quantile 1	GO:0009867	jasmonic acid mediated signaling pathway	1873	448.78	455	0.01194
All	Quantile 1	GO:0043693	monoterpene biosynthetic process	68	16.29	25	0.01231
All	Quantile 1	GO:0048507	meristem development	3561	853.24	874	0.01282
All	Quantile 1	GO:0019673	GDP-mannose metabolic process	28	6.71	10	0.01332
All	Quantile 1	GO:0000132	establishment of mitotic spindle orientation	5	1.2	4	0.01332
All	Quantile 1	GO:0051484	isopentenyl diphosphate biosynthetic process, methylerythritol 4-phosphate pathway involved in terpenoid biosynthetic process	5	1.2	4	0.01332
All	Quantile 1	GO:0051559	phlobaphene biosynthetic process	5	1.2	4	0.01332
All	Quantile 1	GO:0055121	response to high fluence blue light stimulus by blue high-fluence system	5	1.2	4	0.01332
All	Quantile 1	GO:0015857	uracil transport	35	8.39	11	0.01332
All	Quantile 1	GO:0042548	regulation of photosynthesis, light reaction	110	26.36	22	0.01334
All	Quantile 1	GO:0044257	cellular protein catabolic process	4122	987.66	1057	0.01361
All	Quantile 1	GO:0019685	photosynthesis, dark reaction	72	17.25	28	0.01374
All	Quantile 1	GO:1903798	regulation of production of miRNAs involved in gene silencing by miRNA	7	1.68	5	0.01375
All	Quantile 1	GO:0001113	transcriptional open complex formation at RNA polymerase II promoter	3	0.72	3	0.01375
All	Quantile 1	GO:0002191	cap-dependent translational initiation	3	0.72	3	0.01375
All	Quantile 1	GO:0010352	lithium ion export across the plasma membrane	3	0.72	3	0.01375
All	Quantile 1	GO:0010730	negative regulation of hydrogen peroxide biosynthetic process	3	0.72	3	0.01375
All	Quantile 1	GO:0016031	tRNA import into mitochondrion	3	0.72	3	0.01375
All	Quantile 1	GO:0032928	regulation of superoxide anion generation	3	0.72	3	0.01375
All	Quantile 1	GO:0033468	CMP-keto-3-deoxy-D-manno-octulosonic acid biosynthetic process	3	0.72	3	0.01375
All	Quantile 1	GO:0034184	positive regulation of maintenance of mitotic sister chromatid cohesion	3	0.72	3	0.01375
All	Quantile 1	GO:0046104	thymidine metabolic process	3	0.72	3	0.01375
All	Quantile 1	GO:0048488	synaptic vesicle endocytosis	3	0.72	3	0.01375
All	Quantile 1	GO:0050708	regulation of protein secretion	3	0.72	3	0.01375
All	Quantile 1	GO:0060195	negative regulation of antisense RNA transcription	3	0.72	3	0.01375
All	Quantile 1	GO:0060250	germ-line stem-cell niche homeostasis	3	0.72	3	0.01375
All	Quantile 1	GO:0060586	multicellular organismal iron ion homeostasis	3	0.72	3	0.01375
All	Quantile 1	GO:1901537	positive regulation of DNA demethylation	3	0.72	3	0.01375
All	Quantile 1	GO:1902185	positive regulation of shoot apical meristem development	3	0.72	3	0.01375
All	Quantile 1	GO:1902975	mitotic DNA replication initiation	3	0.72	3	0.01375
All	Quantile 1	GO:1904821	chloroplast disassembly	3	0.72	3	0.01375
All	Quantile 1	GO:1990592	protein K69-linked ufmylation	3	0.72	3	0.01375
All	Quantile 1	GO:2000185	regulation of phosphate transmembrane transport	3	0.72	3	0.01375
All	Quantile 1	GO:0034614	cellular response to reactive oxygen species	642	153.83	156	0.01375
All	Quantile 1	GO:0019762	glucosinolate catabolic process	142	34.02	32	0.01406
All	Quantile 1	GO:1990110	callus formation	36	8.63	15	0.01425
All	Quantile 1	GO:0080134	regulation of response to stress	7370	1765.9	1985	0.01427
All	Quantile 1	GO:2001141	regulation of RNA biosynthetic process	11906	2852.75	2618	0.01433
All	Quantile 1	GO:0006646	phosphatidylethanolamine biosynthetic process	21	5.03	10	0.01534
All	Quantile 1	GO:0007530	sex determination	21	5.03	10	0.01534
All	Quantile 1	GO:0006627	protein processing involved in protein targeting to mitochondrion	27	6.47	12	0.01551
All	Quantile 1	GO:0006402	mRNA catabolic process	571	136.82	86	0.01591
All	Quantile 1	GO:0007134	meiotic telophase I	10	2.4	6	0.01597
All	Quantile 1	GO:0009081	branched-chain amino acid metabolic process	127	30.43	33	0.01598
All	Quantile 1	GO:0019253	reductive pentose-phosphate cycle	69	16.53	25	0.01738
All	Quantile 1	GO:0010193	response to ozone	951	227.87	256	0.01829
All	Quantile 1	GO:0044237	cellular metabolic process	50087	12001.1	11622	0.01863
All	Quantile 1	GO:0010226	response to lithium ion	244	58.46	73	0.01928
All	Quantile 1	GO:0010390	histone monoubiquitination	13	3.11	7	0.01929
All	Quantile 1	GO:0015720	allantoin transport	13	3.11	7	0.01929
All	Quantile 1	GO:0048505	regulation of timing of cell differentiation	13	3.11	7	0.01929
All	Quantile 1	GO:2001295	malonyl-CoA biosynthetic process	13	3.11	7	0.01929
All	Quantile 1	GO:0071456	cellular response to hypoxia	462	110.7	128	0.0203
All	Quantile 1	GO:0016560	protein import into peroxisome matrix, docking	16	3.83	8	0.02115
All	Quantile 1	GO:0050691	regulation of defense response to virus by host	55	13.18	16	0.02193
All	Quantile 1	GO:0045770	positive regulation of asymmetric cell division	8	1.92	5	0.02279
All	Quantile 1	GO:0048103	somatic stem cell division	8	1.92	5	0.02279
All	Quantile 1	GO:0090213	regulation of radial pattern formation	8	1.92	5	0.02279
All	Quantile 1	GO:0048759	xylem vessel member cell differentiation	41	9.82	16	0.02282
All	Quantile 1	GO:0032260	response to jasmonic acid stimulus involved in jasmonic acid and ethylene-dependent systemic resistance	103	24.68	34	0.02356
All	Quantile 1	GO:0010204	defense response signaling pathway, resistance gene-independent	792	189.77	214	0.02468
All	Quantile 1	GO:0019853	L-ascorbic acid biosynthetic process	373	89.37	134	0.02554
All	Quantile 1	GO:0000737	DNA catabolic process, endonucleolytic	35	8.39	14	0.02576
All	Quantile 1	GO:0009620	response to fungus	8614	2063.97	2548	0.02799
All	Quantile 1	GO:0010016	shoot system morphogenesis	3316	794.53	804	0.02838
All	Quantile 1	GO:0052696	flavonoid glucuronidation	709	169.88	192	0.02927
All	Quantile 1	GO:0034976	response to endoplasmic reticulum stress	2677	641.43	661	0.02939
All	Quantile 1	GO:0009964	negative regulation of flavonoid biosynthetic process	59	14.14	21	0.0298
All	Quantile 1	GO:0006310	DNA recombination	1491	357.25	322	0.03012
All	Quantile 1	GO:0044208	'de novo' AMP biosynthetic process	14	3.35	7	0.03073
All	Quantile 1	GO:0090342	regulation of cell aging	31	7.43	11	0.031
All	Quantile 1	GO:0007169	transmembrane receptor protein tyrosine kinase signaling pathway	1566	375.22	407	0.03163
All	Quantile 1	GO:0000244	spliceosomal tri-snRNP complex assembly	20	4.79	9	0.03167
All	Quantile 1	GO:0048016	inositol phosphate-mediated signaling	17	4.07	8	0.03171
All	Quantile 1	GO:0046839	phospholipid dephosphorylation	99	23.72	21	0.03173
All	Quantile 1	GO:0009753	response to jasmonic acid	3963	949.56	1002	0.03177
All	Quantile 1	GO:0043144	snoRNA processing	38	9.11	13	0.03237
All	Quantile 1	GO:0006127	glycerophosphate shuttle	6	1.44	4	0.03237
All	Quantile 1	GO:0006226	dUMP biosynthetic process	6	1.44	4	0.03237
All	Quantile 1	GO:0034337	RNA folding	6	1.44	4	0.03237
All	Quantile 1	GO:0042352	GDP-L-fucose salvage	6	1.44	4	0.03237
All	Quantile 1	GO:0046081	dUTP catabolic process	6	1.44	4	0.03237
All	Quantile 1	GO:0071211	protein targeting to vacuole involved in autophagy	6	1.44	4	0.03237
All	Quantile 1	GO:1902326	positive regulation of chlorophyll biosynthetic process	6	1.44	4	0.03237
All	Quantile 1	GO:0048208	COPII vesicle coating	15	3.59	5	0.03238
All	Quantile 1	GO:0048564	photosystem I assembly	36	8.63	14	0.03308
All	Quantile 1	GO:0090116	C-5 methylation of cytosine	46	11.02	17	0.03339
All	Quantile 1	GO:0008610	lipid biosynthetic process	5578	1336.52	1483	0.03375
All	Quantile 1	GO:0022603	regulation of anatomical structure morphogenesis	1679	402.3	376	0.03388
All	Quantile 1	GO:0045491	xylan metabolic process	908	217.56	226	0.03527
All	Quantile 1	GO:0010981	regulation of cell wall macromolecule metabolic process	40	9.58	14	0.03532
All	Quantile 1	GO:0008219	cell death	7001	1677.48	2239	0.03581
All	Quantile 1	GO:0001731	formation of translation preinitiation complex	67	16.05	23	0.03611
All	Quantile 1	GO:0019761	glucosinolate biosynthetic process	1564	374.74	496	0.03706
All	Quantile 1	GO:0009595	detection of biotic stimulus	1573	376.9	485	0.03853
All	Quantile 1	GO:0016126	sterol biosynthetic process	630	150.95	173	0.03907
All	Quantile 1	GO:1902334	fructose export from vacuole to cytoplasm	64	15.33	22	0.0392
All	Quantile 1	GO:0009229	thiamine diphosphate biosynthetic process	27	6.47	11	0.03984
All	Quantile 1	GO:0009407	toxin catabolic process	914	219	242	0.04091
All	Quantile 1	GO:0015882	L-ascorbic acid transmembrane transport	9	2.16	5	0.04127
All	Quantile 1	GO:0052865	1-deoxy-D-xylulose 5-phosphate biosynthetic process	9	2.16	5	0.04127
All	Quantile 1	GO:1900036	positive regulation of cellular response to heat	9	2.16	5	0.04127
All	Quantile 1	GO:0009452	7-methylguanosine RNA capping	31	7.43	8	0.04129
All	Quantile 1	GO:0046688	response to copper ion	170	40.73	61	0.04139
All	Quantile 1	GO:0042542	response to hydrogen peroxide	2270	543.91	587	0.04145
All	Quantile 1	GO:1901684	arsenate ion transmembrane transport	24	5.75	10	0.042
All	Quantile 1	GO:0010089	xylem development	1641	393.19	433	0.0438
All	Quantile 1	GO:0006672	ceramide metabolic process	102	24.44	17	0.04406
All	Quantile 1	GO:0031627	telomeric loop formation	44	10.54	16	0.04435
All	Quantile 1	GO:0051260	protein homooligomerization	939	224.99	241	0.04458
All	Quantile 1	GO:0016180	snRNA processing	51	12.22	13	0.04501
All	Quantile 1	GO:0009677	double fertilization forming two zygotes	4	0.96	3	0.04513
All	Quantile 1	GO:0012502	induction of programmed cell death	4	0.96	3	0.04513
All	Quantile 1	GO:0006723	cuticle hydrocarbon biosynthetic process	18	4.31	8	0.04536
All	Quantile 1	GO:0018171	peptidyl-cysteine oxidation	18	4.31	8	0.04536
All	Quantile 1	GO:0015931	nucleobase-containing compound transport	799	191.45	153	0.04569
All	Quantile 1	GO:2000031	regulation of salicylic acid mediated signaling pathway	142	34.02	42	0.04578
All	Quantile 1	GO:0010031	circumnutation	15	3.59	7	0.04594
All	Quantile 1	GO:0031998	regulation of fatty acid beta-oxidation	15	3.59	7	0.04594
All	Quantile 1	GO:0035444	nickel cation transmembrane transport	15	3.59	7	0.04594
All	Quantile 1	GO:0050982	detection of mechanical stimulus	15	3.59	7	0.04594
All	Quantile 1	GO:0080093	regulation of photorespiration	15	3.59	7	0.04594
All	Quantile 1	GO:0046323	glucose import	186	44.57	55	0.04617
All	Quantile 1	GO:0032543	mitochondrial translation	96	23	27	0.04629
All	Quantile 1	GO:0046482	para-aminobenzoic acid metabolic process	561	134.42	152	0.04644
All	Quantile 1	GO:0010043	response to zinc ion	1054	252.54	277	0.04863
All	Quantile 1	GO:0009556	microsporogenesis	807	193.36	214	0.04876
A	Quantile 1	GO:0009626	plant-type hypersensitive response	1873	452.14	603	9.1e-20
A	Quantile 1	GO:0006468	protein phosphorylation	2543	613.87	714	6.9e-15
A	Quantile 1	GO:2000280	regulation of root development	297	71.69	118	5.4e-14
A	Quantile 1	GO:0055114	oxidation-reduction process	3028	730.95	825	1e-12
A	Quantile 1	GO:0006511	ubiquitin-dependent protein catabolic process	1031	248.88	307	4.8e-12
A	Quantile 1	GO:0042351	'de novo' GDP-L-fucose biosynthetic process	37	8.93	29	5.6e-12
A	Quantile 1	GO:0006952	defense response	6538	1578.25	1821	6.5e-12
A	Quantile 1	GO:0009964	negative regulation of flavonoid biosynthetic process	21	5.07	20	7.2e-12
A	Quantile 1	GO:0033609	oxalate metabolic process	63	15.21	41	1.8e-11
A	Quantile 1	GO:0046713	borate transport	99	23.9	52	7.5e-10
A	Quantile 1	GO:0010497	plasmodesmata-mediated intercellular transport	71	17.14	41	1.4e-09
A	Quantile 1	GO:0007165	signal transduction	4933	1190.81	1217	1.9e-09
A	Quantile 1	GO:0006857	oligopeptide transport	225	54.31	75	1.8e-08
A	Quantile 1	GO:0044237	cellular metabolic process	16504	3984.01	3869	4.1e-08
A	Quantile 1	GO:0071289	cellular response to nickel ion	26	6.28	19	2e-07
A	Quantile 1	GO:0050832	defense response to fungus	2222	536.38	635	3.1e-07
A	Quantile 1	GO:0006915	apoptotic process	327	78.94	120	4.3e-07
A	Quantile 1	GO:0009561	megagametogenesis	498	120.22	154	1.9e-06
A	Quantile 1	GO:0060416	response to growth hormone	58	14	30	5.2e-06
A	Quantile 1	GO:0002213	defense response to insect	129	31.14	49	5.6e-06
A	Quantile 1	GO:0006694	steroid biosynthetic process	389	93.9	99	1e-05
A	Quantile 1	GO:0009814	defense response, incompatible interaction	2575	621.6	723	1.2e-05
A	Quantile 1	GO:0080148	negative regulation of response to water deprivation	63	15.21	31	1.4e-05
A	Quantile 1	GO:0080110	sporopollenin biosynthetic process	212	51.18	78	2.5e-05
A	Quantile 1	GO:0010311	lateral root formation	219	52.87	80	2.6e-05
A	Quantile 1	GO:0009625	response to insect	278	67.11	97	3.4e-05
A	Quantile 1	GO:0010951	negative regulation of endopeptidase activity	87	21	38	3.5e-05
A	Quantile 1	GO:0016567	protein ubiquitination	1370	330.71	390	3.7e-05
A	Quantile 1	GO:0009704	de-etiolation	79	19.07	35	6.7e-05
A	Quantile 1	GO:0000041	transition metal ion transport	451	108.87	116	0.00018
A	Quantile 1	GO:0071456	cellular response to hypoxia	148	35.73	55	0.0002
A	Quantile 1	GO:0006979	response to oxidative stress	2063	498	517	0.00022
A	Quantile 1	GO:0009646	response to absence of light	179	43.21	61	0.00027
A	Quantile 1	GO:0045926	negative regulation of growth	293	70.73	82	0.00031
A	Quantile 1	GO:0010112	regulation of systemic acquired resistance	210	50.69	73	0.00033
A	Quantile 1	GO:0044249	cellular biosynthetic process	10081	2433.52	2220	0.00046
A	Quantile 1	GO:0040009	regulation of growth rate	158	38.14	57	0.0005
A	Quantile 1	GO:0009759	indole glucosinolate biosynthetic process	165	39.83	59	0.00053
A	Quantile 1	GO:0071472	cellular response to salt stress	346	83.52	105	0.00055
A	Quantile 1	GO:0009805	coumarin biosynthetic process	246	59.38	82	0.00068
A	Quantile 1	GO:0031348	negative regulation of defense response	1172	282.92	323	0.00069
A	Quantile 1	GO:0042177	negative regulation of protein catabolic process	39	9.41	19	0.00073
A	Quantile 1	GO:0009643	photosynthetic acclimation	42	10.14	20	0.00078
A	Quantile 1	GO:0009813	flavonoid biosynthetic process	850	205.19	257	0.00078
A	Quantile 1	GO:0000162	tryptophan biosynthetic process	181	43.69	63	0.00079
A	Quantile 1	GO:0006749	glutathione metabolic process	112	27.04	43	0.0008
A	Quantile 1	GO:0045792	negative regulation of cell size	5	1.21	5	0.00082
A	Quantile 1	GO:0010466	negative regulation of peptidase activity	105	25.35	49	0.00088
A	Quantile 1	GO:0046622	positive regulation of organ growth	155	37.42	55	0.00098
A	Quantile 1	GO:0051792	medium-chain fatty acid biosynthetic process	155	37.42	55	0.00098
A	Quantile 1	GO:0048527	lateral root development	666	160.77	206	0.00107
A	Quantile 1	GO:0009617	response to bacterium	2743	662.15	724	0.00122
A	Quantile 1	GO:0010082	regulation of root meristem growth	90	21.73	35	0.00131
A	Quantile 1	GO:0010363	regulation of plant-type hypersensitive response	1126	271.81	314	0.00143
A	Quantile 1	GO:0031640	killing of cells of other organism	35	8.45	17	0.00144
A	Quantile 1	GO:0071249	cellular response to nitrate	27	6.52	14	0.0017
A	Quantile 1	GO:0010447	response to acidic pH	17	4.1	10	0.00233
A	Quantile 1	GO:0009620	response to fungus	2787	672.77	781	0.00334
A	Quantile 1	GO:0009859	pollen hydration	4	0.97	4	0.00339
A	Quantile 1	GO:0006801	superoxide metabolic process	33	7.97	7	0.0034
A	Quantile 1	GO:0016045	detection of bacterium	299	72.18	93	0.00351
A	Quantile 1	GO:0010338	leaf formation	163	39.35	55	0.00352
A	Quantile 1	GO:0000160	phosphorelay signal transduction system	608	146.77	163	0.00353
A	Quantile 1	GO:0002229	defense response to oomycetes	235	56.73	74	0.00359
A	Quantile 1	GO:0048830	adventitious root development	174	42	58	0.00378
A	Quantile 1	GO:0001732	formation of cytoplasmic translation initiation complex	6	1.45	5	0.00392
A	Quantile 1	GO:0071836	nectar secretion	32	7.72	15	0.00417
A	Quantile 1	GO:0010114	response to red light	458	110.56	128	0.00427
A	Quantile 1	GO:0006744	ubiquinone biosynthetic process	196	47.31	64	0.00452
A	Quantile 1	GO:0010120	camalexin biosynthetic process	215	51.9	69	0.00486
A	Quantile 1	GO:0048437	floral organ development	1390	335.54	326	0.00511
A	Quantile 1	GO:0042631	cellular response to water deprivation	519	125.28	151	0.00515
A	Quantile 1	GO:0009862	systemic acquired resistance, salicylic acid mediated signaling pathway	740	178.63	209	0.00519
A	Quantile 1	GO:0016124	xanthophyll catabolic process	11	2.66	7	0.00613
A	Quantile 1	GO:0035336	long-chain fatty-acyl-CoA metabolic process	11	2.66	7	0.00613
A	Quantile 1	GO:0009631	cold acclimation	171	41.28	56	0.00659
A	Quantile 1	GO:0009682	induced systemic resistance	310	74.83	84	0.00685
A	Quantile 1	GO:0045493	xylan catabolic process	43	10.38	18	0.00778
A	Quantile 1	GO:0009809	lignin biosynthetic process	400	96.56	116	0.0078
A	Quantile 1	GO:0090116	C-5 methylation of cytosine	14	3.38	8	0.00823
A	Quantile 1	GO:0070988	demethylation	39	9.41	13	0.00824
A	Quantile 1	GO:0046741	transport of virus in host, tissue to tissue	9	2.17	6	0.00832
A	Quantile 1	GO:0009733	response to auxin	1280	308.99	303	0.00844
A	Quantile 1	GO:0002237	response to molecule of bacterial origin	274	66.14	85	0.01077
A	Quantile 1	GO:0009653	anatomical structure morphogenesis	3421	825.82	762	0.01157
A	Quantile 1	GO:0006083	acetate metabolic process	15	3.62	8	0.01167
A	Quantile 1	GO:0019605	butyrate metabolic process	12	2.9	7	0.01167
A	Quantile 1	GO:0030418	nicotianamine biosynthetic process	12	2.9	7	0.01167
A	Quantile 1	GO:0080028	nitrile biosynthetic process	12	2.9	7	0.01167
A	Quantile 1	GO:0009409	response to cold	3323	802.16	793	0.01224
A	Quantile 1	GO:2000083	negative regulation of L-ascorbic acid biosynthetic process	81	19.55	29	0.01228
A	Quantile 1	GO:0010025	wax biosynthetic process	117	28.24	37	0.01228
A	Quantile 1	GO:0080167	response to karrikin	914	220.64	250	0.01241
A	Quantile 1	GO:0010585	glutamine secretion	5	1.21	4	0.01369
A	Quantile 1	GO:0080143	regulation of amino acid export	5	1.21	4	0.01369
A	Quantile 1	GO:0009415	response to water	2342	565.35	568	0.01369
A	Quantile 1	GO:0010204	defense response signaling pathway, resistance gene-independent	250	60.35	76	0.01374
A	Quantile 1	GO:0006569	tryptophan catabolic process	302	72.9	90	0.01378
A	Quantile 1	GO:0045487	gibberellin catabolic process	15	3.62	8	0.01395
A	Quantile 1	GO:0002188	translation reinitiation	3	0.72	3	0.01406
A	Quantile 1	GO:0050732	negative regulation of peptidyl-tyrosine phosphorylation	3	0.72	3	0.01406
A	Quantile 1	GO:0090213	regulation of radial pattern formation	3	0.72	3	0.01406
A	Quantile 1	GO:0009611	response to wounding	1910	461.07	501	0.01409
A	Quantile 1	GO:0010231	maintenance of seed dormancy	193	46.59	61	0.01472
A	Quantile 1	GO:0048544	recognition of pollen	177	42.73	55	0.01544
A	Quantile 1	GO:0048316	seed development	2170	523.83	521	0.01578
A	Quantile 1	GO:0010224	response to UV-B	775	187.08	213	0.01617
A	Quantile 1	GO:0019253	reductive pentose-phosphate cycle	24	5.79	11	0.01645
A	Quantile 1	GO:0010286	heat acclimation	548	132.29	148	0.01685
A	Quantile 1	GO:0042754	negative regulation of circadian rhythm	37	8.93	15	0.02
A	Quantile 1	GO:0010422	regulation of brassinosteroid biosynthetic process	45	10.86	16	0.02002
A	Quantile 1	GO:0016121	carotene catabolic process	13	3.14	7	0.02008
A	Quantile 1	GO:1902075	cellular response to salt	13	3.14	7	0.02008
A	Quantile 1	GO:0031571	mitotic G1 DNA damage checkpoint	19	4.59	9	0.02304
A	Quantile 1	GO:0015770	sucrose transport	28	6.76	13	0.02305
A	Quantile 1	GO:0019762	glucosinolate catabolic process	48	11.59	13	0.02311
A	Quantile 1	GO:0006655	phosphatidylglycerol biosynthetic process	82	19.79	28	0.02631
A	Quantile 1	GO:0080036	regulation of cytokinin-activated signaling pathway	17	4.1	8	0.02907
A	Quantile 1	GO:0015706	nitrate transport	644	155.46	173	0.03041
A	Quantile 1	GO:0009641	shade avoidance	199	48.04	60	0.03054
A	Quantile 1	GO:0009901	anther dehiscence	229	55.28	68	0.03111
A	Quantile 1	GO:0080060	integument development	14	3.38	7	0.03192
A	Quantile 1	GO:0071446	cellular response to salicylic acid stimulus	1099	265.29	298	0.03246
A	Quantile 1	GO:1902476	chloride transmembrane transport	23	5.55	10	0.0325
A	Quantile 1	GO:0035444	nickel cation transmembrane transport	6	1.45	4	0.03323
A	Quantile 1	GO:0090358	positive regulation of tryptophan metabolic process	6	1.45	4	0.03323
A	Quantile 1	GO:0090355	positive regulation of auxin metabolic process	11	2.66	5	0.03323
A	Quantile 1	GO:0048510	regulation of timing of transition from vegetative to reproductive phase	73	17.62	25	0.03324
A	Quantile 1	GO:0006626	protein targeting to mitochondrion	143	34.52	40	0.03329
A	Quantile 1	GO:0002221	pattern recognition receptor signaling pathway	165	39.83	51	0.03357
A	Quantile 1	GO:0009555	pollen development	1398	337.47	386	0.03423
A	Quantile 1	GO:0031146	SCF-dependent proteasomal ubiquitin-dependent protein catabolic process	204	49.24	61	0.03449
A	Quantile 1	GO:0031396	regulation of protein ubiquitination	109	26.31	35	0.03485
A	Quantile 1	GO:0042128	nitrate assimilation	98	23.66	32	0.03488
A	Quantile 1	GO:0006508	proteolysis	2407	581.04	659	0.0359
A	Quantile 1	GO:0010045	response to nickel cation	190	45.87	69	0.03617
A	Quantile 1	GO:0009627	systemic acquired resistance	1813	437.65	503	0.03681
A	Quantile 1	GO:0006097	glyoxylate cycle	30	7.24	12	0.03958
A	Quantile 1	GO:1900459	positive regulation of brassinosteroid mediated signaling pathway	165	39.83	50	0.04131
A	Quantile 1	GO:0007169	transmembrane receptor protein tyrosine kinase signaling pathway	497	119.97	137	0.0417
A	Quantile 1	GO:0010371	regulation of gibberellin biosynthetic process	27	6.52	11	0.04183
A	Quantile 1	GO:0009229	thiamine diphosphate biosynthetic process	9	2.17	5	0.04251
A	Quantile 1	GO:0045723	positive regulation of fatty acid biosynthetic process	9	2.17	5	0.04251
A	Quantile 1	GO:0071323	cellular response to chitin	9	2.17	5	0.04251
A	Quantile 1	GO:1901601	strigolactone biosynthetic process	9	2.17	5	0.04251
A	Quantile 1	GO:0052544	defense response by callose deposition in cell wall	513	123.84	141	0.04279
A	Quantile 1	GO:0008284	positive regulation of cell proliferation	233	56.25	68	0.0439
A	Quantile 1	GO:0009407	toxin catabolic process	294	70.97	84	0.04491
A	Quantile 1	GO:0016180	snRNA processing	18	4.35	7	0.04606
A	Quantile 1	GO:0006580	ethanolamine metabolic process	4	0.97	3	0.04607
A	Quantile 1	GO:0006659	phosphatidylserine biosynthetic process	4	0.97	3	0.04607
A	Quantile 1	GO:0015720	allantoin transport	4	0.97	3	0.04607
A	Quantile 1	GO:1902603	carnitine transmembrane transport	4	0.97	3	0.04607
A	Quantile 1	GO:0015824	proline transport	196	47.31	58	0.04626
A	Quantile 1	GO:0008202	steroid metabolic process	526	126.97	127	0.04659
A	Quantile 1	GO:0015931	nucleobase-containing compound transport	274	66.14	63	0.04669
A	Quantile 1	GO:0009816	defense response to bacterium, incompatible interaction	438	105.73	122	0.04888
B	Quantile 1	GO:0009626	plant-type hypersensitive response	1947	468.33	692	1e-30
B	Quantile 1	GO:0006952	defense response	6700	1611.62	2164	1.9e-27
B	Quantile 1	GO:0006468	protein phosphorylation	2649	637.19	769	1.9e-21
B	Quantile 1	GO:0006915	apoptotic process	372	89.48	162	5e-20
B	Quantile 1	GO:0007165	signal transduction	4978	1197.41	1265	1.4e-18
B	Quantile 1	GO:0009627	systemic acquired resistance	1842	443.07	627	6.2e-18
B	Quantile 1	GO:0009611	response to wounding	1922	462.32	622	3.3e-17
B	Quantile 1	GO:0009814	defense response, incompatible interaction	2695	648.25	947	6.2e-17
B	Quantile 1	GO:0050832	defense response to fungus	2339	562.62	779	1.3e-16
B	Quantile 1	GO:0009817	defense response to fungus, incompatible interaction	358	86.11	154	2.3e-15
B	Quantile 1	GO:0046713	borate transport	134	32.23	70	3.4e-13
B	Quantile 1	GO:0010082	regulation of root meristem growth	100	24.05	57	1.7e-12
B	Quantile 1	GO:2000280	regulation of root development	312	75.05	134	2.7e-12
B	Quantile 1	GO:0009625	response to insect	268	64.46	116	3e-12
B	Quantile 1	GO:0009682	induced systemic resistance	313	75.29	118	5e-11
B	Quantile 1	GO:0009629	response to gravity	456	109.69	109	5.4e-11
B	Quantile 1	GO:0040009	regulation of growth rate	156	37.52	75	5.5e-11
B	Quantile 1	GO:0009759	indole glucosinolate biosynthetic process	168	40.41	78	1.9e-10
B	Quantile 1	GO:0046622	positive regulation of organ growth	153	36.8	72	4.5e-10
B	Quantile 1	GO:0051792	medium-chain fatty acid biosynthetic process	153	36.8	72	4.5e-10
B	Quantile 1	GO:0010497	plasmodesmata-mediated intercellular transport	82	19.72	46	4.9e-10
B	Quantile 1	GO:0033609	oxalate metabolic process	77	18.52	44	5.2e-10
B	Quantile 1	GO:0006744	ubiquinone biosynthetic process	196	47.15	86	8.2e-10
B	Quantile 1	GO:0010224	response to UV-B	805	193.63	266	1.3e-09
B	Quantile 1	GO:0055114	oxidation-reduction process	3062	736.53	827	1.9e-09
B	Quantile 1	GO:0009813	flavonoid biosynthetic process	879	211.43	269	2e-09
B	Quantile 1	GO:0080110	sporopollenin biosynthetic process	203	48.83	87	2.7e-09
B	Quantile 1	GO:0000162	tryptophan biosynthetic process	182	43.78	80	2.8e-09
B	Quantile 1	GO:0052544	defense response by callose deposition in cell wall	543	130.61	190	4.9e-09
B	Quantile 1	GO:0010338	leaf formation	161	38.73	72	7e-09
B	Quantile 1	GO:0048437	floral organ development	1448	348.3	354	1.6e-08
B	Quantile 1	GO:0009694	jasmonic acid metabolic process	354	85.15	109	1.9e-08
B	Quantile 1	GO:0010120	camalexin biosynthetic process	208	50.03	86	2.5e-08
B	Quantile 1	GO:0010112	regulation of systemic acquired resistance	202	48.59	84	2.7e-08
B	Quantile 1	GO:0048316	seed development	2180	524.38	560	3.5e-08
B	Quantile 1	GO:0048830	adventitious root development	170	40.89	73	4.4e-08
B	Quantile 1	GO:0002229	defense response to oomycetes	245	58.93	96	5.6e-08
B	Quantile 1	GO:0031348	negative regulation of defense response	1227	295.14	367	1.3e-07
B	Quantile 1	GO:0016045	detection of bacterium	306	73.61	114	1.5e-07
B	Quantile 1	GO:0016099	monoterpenoid biosynthetic process	11	2.65	11	1.6e-07
B	Quantile 1	GO:0016106	sesquiterpenoid biosynthetic process	112	26.94	32	2.2e-07
B	Quantile 1	GO:0042742	defense response to bacterium	2294	551.8	702	1.6e-06
B	Quantile 1	GO:0009641	shade avoidance	194	46.66	76	2e-06
B	Quantile 1	GO:0010025	wax biosynthetic process	121	29.11	48	2.7e-06
B	Quantile 1	GO:0009816	defense response to bacterium, incompatible interaction	492	118.35	162	2.8e-06
B	Quantile 1	GO:0009686	gibberellin biosynthetic process	149	35.84	59	3.4e-06
B	Quantile 1	GO:0006569	tryptophan catabolic process	313	75.29	111	3.5e-06
B	Quantile 1	GO:0071289	cellular response to nickel ion	23	5.53	16	5.1e-06
B	Quantile 1	GO:0009805	coumarin biosynthetic process	255	61.34	93	5.7e-06
B	Quantile 1	GO:0009715	chalcone biosynthetic process	17	4.09	13	7.8e-06
B	Quantile 1	GO:0008284	positive regulation of cell proliferation	227	54.6	84	8.3e-06
B	Quantile 1	GO:0010114	response to red light	446	107.28	139	1.2e-05
B	Quantile 1	GO:0019745	pentacyclic triterpenoid biosynthetic process	47	11.31	25	1.6e-05
B	Quantile 1	GO:0080167	response to karrikin	932	224.18	278	2.4e-05
B	Quantile 1	GO:0010363	regulation of plant-type hypersensitive response	1096	263.63	320	3.5e-05
B	Quantile 1	GO:0002679	respiratory burst involved in defense response	364	87.56	121	4.2e-05
B	Quantile 1	GO:0042593	glucose homeostasis	35	8.42	9	4.7e-05
B	Quantile 1	GO:0002237	response to molecule of bacterial origin	254	61.1	87	5.2e-05
B	Quantile 1	GO:0000160	phosphorelay signal transduction system	640	153.95	183	5.3e-05
B	Quantile 1	GO:0009684	indoleacetic acid biosynthetic process	346	83.23	115	6.5e-05
B	Quantile 1	GO:0070988	demethylation	45	10.82	16	6.6e-05
B	Quantile 1	GO:0042351	'de novo' GDP-L-fucose biosynthetic process	42	10.1	22	6.9e-05
B	Quantile 1	GO:0009809	lignin biosynthetic process	388	93.33	113	8.6e-05
B	Quantile 1	GO:0009740	gibberellic acid mediated signaling pathway	182	43.78	66	9.8e-05
B	Quantile 1	GO:0080027	response to herbivore	78	18.76	34	0.00012
B	Quantile 1	GO:0046482	para-aminobenzoic acid metabolic process	195	46.91	70	0.00013
B	Quantile 1	GO:0010439	regulation of glucosinolate biosynthetic process	25	6.01	15	0.00013
B	Quantile 1	GO:0002215	defense response to nematode	52	12.51	25	0.00014
B	Quantile 1	GO:0071249	cellular response to nitrate	26	6.25	15	0.00025
B	Quantile 1	GO:0006887	exocytosis	124	29.83	38	0.00029
B	Quantile 1	GO:0030497	fatty acid elongation	8	1.92	7	0.00029
B	Quantile 1	GO:0010106	cellular response to iron ion starvation	330	79.38	107	0.00033
B	Quantile 1	GO:0009862	systemic acquired resistance, salicylic acid mediated signaling pathway	724	174.15	214	0.00034
B	Quantile 1	GO:0070413	trehalose metabolism in response to stress	13	3.13	9	0.00073
B	Quantile 1	GO:0009643	photosynthetic acclimation	40	9.62	19	0.00103
B	Quantile 1	GO:0007133	meiotic anaphase I	7	1.68	6	0.00107
B	Quantile 1	GO:0052696	flavonoid glucuronidation	248	59.65	81	0.00127
B	Quantile 1	GO:0010231	maintenance of seed dormancy	229	55.08	75	0.00172
B	Quantile 1	GO:0009696	salicylic acid metabolic process	492	118.35	139	0.0019
B	Quantile 1	GO:0042631	cellular response to water deprivation	558	134.22	164	0.00204
B	Quantile 1	GO:0019295	coenzyme M biosynthetic process	17	4.09	10	0.00227
B	Quantile 1	GO:0009871	jasmonic acid and ethylene-dependent systemic resistance, ethylene mediated signaling pathway	25	6.01	13	0.00232
B	Quantile 1	GO:0048507	meristem development	1174	282.39	312	0.00248
B	Quantile 1	GO:0009733	response to auxin	1265	304.28	299	0.00274
B	Quantile 1	GO:0051555	flavonol biosynthetic process	205	49.31	60	0.00283
B	Quantile 1	GO:0007606	sensory perception of chemical stimulus	8	1.92	6	0.00342
B	Quantile 1	GO:0048730	epidermis morphogenesis	8	1.92	6	0.00342
B	Quantile 1	GO:0009831	plant-type cell wall modification involved in multidimensional cell growth	82	19.72	31	0.00377
B	Quantile 1	GO:0070301	cellular response to hydrogen peroxide	120	28.86	42	0.00451
B	Quantile 1	GO:0006865	amino acid transport	506	121.71	136	0.00459
B	Quantile 1	GO:0002213	defense response to insect	127	30.55	42	0.00489
B	Quantile 1	GO:0010045	response to nickel cation	214	51.48	78	0.00491
B	Quantile 1	GO:0042177	negative regulation of protein catabolic process	54	12.99	22	0.00508
B	Quantile 1	GO:0042178	xenobiotic catabolic process	97	23.33	35	0.00524
B	Quantile 1	GO:0006182	cGMP biosynthetic process	195	46.91	63	0.00538
B	Quantile 1	GO:0019953	sexual reproduction	1003	241.26	239	0.00558
B	Quantile 1	GO:0016125	sterol metabolic process	257	61.82	82	0.00559
B	Quantile 1	GO:0045926	negative regulation of growth	304	73.12	90	0.00568
B	Quantile 1	GO:0006873	cellular ion homeostasis	736	177.04	176	0.00571
B	Quantile 1	GO:0010075	regulation of meristem growth	622	149.62	208	0.00576
B	Quantile 1	GO:0030639	polyketide biosynthetic process	11	2.65	7	0.00601
B	Quantile 1	GO:0018874	benzoate metabolic process	108	25.98	38	0.00605
B	Quantile 1	GO:0071475	cellular hyperosmotic salinity response	108	25.98	38	0.00605
B	Quantile 1	GO:0009751	response to salicylic acid	1773	426.48	493	0.00609
B	Quantile 1	GO:1900459	positive regulation of brassinosteroid mediated signaling pathway	193	46.42	62	0.00656
B	Quantile 1	GO:0010016	shoot system morphogenesis	1085	260.99	277	0.00669
B	Quantile 1	GO:0009828	plant-type cell wall loosening	85	20.45	31	0.00694
B	Quantile 1	GO:0016131	brassinosteroid metabolic process	332	79.86	101	0.00718
B	Quantile 1	GO:0046323	glucose import	62	14.91	24	0.0072
B	Quantile 1	GO:0007029	endoplasmic reticulum organization	30	7.22	12	0.00734
B	Quantile 1	GO:0002221	pattern recognition receptor signaling pathway	194	46.66	62	0.00742
B	Quantile 1	GO:0051762	sesquiterpene biosynthetic process	14	3.37	8	0.00805
B	Quantile 1	GO:0043693	monoterpene biosynthetic process	31	7.46	14	0.00808
B	Quantile 1	GO:1900000	regulation of anthocyanin catabolic process	96	23.09	34	0.0081
B	Quantile 1	GO:0010260	animal organ senescence	73	17.56	27	0.00915
B	Quantile 1	GO:0032259	methylation	996	239.58	209	0.00937
B	Quantile 1	GO:0010043	response to zinc ion	364	87.56	107	0.0106
B	Quantile 1	GO:0009409	response to cold	3364	809.18	758	0.0108
B	Quantile 1	GO:0018171	peptidyl-cysteine oxidation	7	1.68	5	0.01082
B	Quantile 1	GO:0031571	mitotic G1 DNA damage checkpoint	23	5.53	11	0.01104
B	Quantile 1	GO:0080024	indolebutyric acid metabolic process	112	26.94	38	0.01162
B	Quantile 1	GO:0071370	cellular response to gibberellin stimulus	188	45.22	70	0.01335
B	Quantile 1	GO:0006580	ethanolamine metabolic process	5	1.2	4	0.01351
B	Quantile 1	GO:0009866	induced systemic resistance, ethylene mediated signaling pathway	5	1.2	4	0.01351
B	Quantile 1	GO:0010585	glutamine secretion	5	1.2	4	0.01351
B	Quantile 1	GO:0080143	regulation of amino acid export	5	1.2	4	0.01351
B	Quantile 1	GO:2001295	malonyl-CoA biosynthetic process	5	1.2	4	0.01351
B	Quantile 1	GO:0009859	pollen hydration	3	0.72	3	0.01391
B	Quantile 1	GO:0070291	N-acylethanolamine metabolic process	3	0.72	3	0.01391
B	Quantile 1	GO:0010204	defense response signaling pathway, resistance gene-independent	259	62.3	78	0.01473
B	Quantile 1	GO:0071836	nectar secretion	33	7.94	14	0.01527
B	Quantile 1	GO:0010311	lateral root formation	234	56.29	71	0.01618
B	Quantile 1	GO:0030418	nicotianamine biosynthetic process	10	2.41	6	0.01628
B	Quantile 1	GO:0030187	melatonin biosynthetic process	56	13.47	21	0.01699
B	Quantile 1	GO:1901527	abscisic acid-activated signaling pathway involved in stomatal movement	313	75.29	92	0.01704
B	Quantile 1	GO:0009266	response to temperature stimulus	4249	1022.05	997	0.01827
B	Quantile 1	GO:0008299	isoprenoid biosynthetic process	718	172.71	202	0.01928
B	Quantile 1	GO:0010193	response to ozone	330	79.38	96	0.01991
B	Quantile 1	GO:0044249	cellular biosynthetic process	10225	2459.52	2280	0.01996
B	Quantile 1	GO:0008610	lipid biosynthetic process	1842	443.07	519	0.02021
B	Quantile 1	GO:0009631	cold acclimation	159	38.25	50	0.02028
B	Quantile 1	GO:0009636	response to toxic substance	1310	315.11	332	0.02066
B	Quantile 1	GO:0009690	cytokinin metabolic process	177	42.58	54	0.02203
B	Quantile 1	GO:0045493	xylan catabolic process	44	10.58	17	0.02215
B	Quantile 1	GO:2000083	negative regulation of L-ascorbic acid biosynthetic process	99	23.81	33	0.02313
B	Quantile 1	GO:0007530	sex determination	8	1.92	5	0.02316
B	Quantile 1	GO:0009753	response to jasmonic acid	1282	308.37	339	0.02492
B	Quantile 1	GO:0006520	cellular amino acid metabolic process	1402	337.24	342	0.02599
B	Quantile 1	GO:0009617	response to bacterium	2810	675.92	850	0.02605
B	Quantile 1	GO:0000966	RNA 5'-end processing	37	8.9	15	0.02799
B	Quantile 1	GO:0080003	thalianol metabolic process	11	2.65	6	0.0286
B	Quantile 1	GO:0006511	ubiquitin-dependent protein catabolic process	1165	280.23	295	0.03163
B	Quantile 1	GO:0005985	sucrose metabolic process	70	16.84	19	0.03245
B	Quantile 1	GO:0006809	nitric oxide biosynthetic process	6	1.44	4	0.03281
B	Quantile 1	GO:0048358	mucilage pectin biosynthetic process	6	1.44	4	0.03281
B	Quantile 1	GO:0009646	response to absence of light	178	42.82	55	0.03282
B	Quantile 1	GO:0006171	cAMP biosynthetic process	36	8.66	14	0.03406
B	Quantile 1	GO:0010119	regulation of stomatal movement	274	65.91	71	0.03677
B	Quantile 1	GO:0019375	galactolipid biosynthetic process	135	32.47	42	0.03691
B	Quantile 1	GO:0000041	transition metal ion transport	438	105.36	111	0.03696
B	Quantile 1	GO:0010023	proanthocyanidin biosynthetic process	62	14.91	22	0.03708
B	Quantile 1	GO:0010466	negative regulation of peptidase activity	113	27.18	36	0.03843
B	Quantile 1	GO:0015706	nitrate transport	646	155.39	180	0.03865
B	Quantile 1	GO:0007160	cell-matrix adhesion	40	9.62	15	0.03998
B	Quantile 1	GO:0016567	protein ubiquitination	1472	354.07	376	0.0408
B	Quantile 1	GO:0050891	multicellular organismal water homeostasis	9	2.16	5	0.0419
B	Quantile 1	GO:0031408	oxylipin biosynthetic process	100	24.05	32	0.04358
B	Quantile 1	GO:0009628	response to abiotic stimulus	9117	2193	2255	0.04398
B	Quantile 1	GO:0016139	glycoside catabolic process	117	28.14	43	0.04446
B	Quantile 1	GO:0010583	response to cyclopentenone	174	41.85	52	0.04548
B	Quantile 1	GO:0001732	formation of cytoplasmic translation initiation complex	4	0.96	3	0.04561
B	Quantile 1	GO:0006659	phosphatidylserine biosynthetic process	4	0.96	3	0.04561
B	Quantile 1	GO:0007134	meiotic telophase I	4	0.96	3	0.04561
B	Quantile 1	GO:0099636	cytoplasmic streaming	4	0.96	3	0.04561
B	Quantile 1	GO:0009081	branched-chain amino acid metabolic process	43	10.34	10	0.04566
B	Quantile 1	GO:0006801	superoxide metabolic process	30	7.22	6	0.04568
B	Quantile 1	GO:0000737	DNA catabolic process, endonucleolytic	12	2.89	6	0.04576
B	Quantile 1	GO:0009270	response to humidity	12	2.89	6	0.04576
B	Quantile 1	GO:0030029	actin filament-based process	288	69.28	55	0.04592
B	Quantile 1	GO:0070085	glycosylation	365	87.8	58	0.04622
B	Quantile 1	GO:0048440	carpel development	554	133.26	134	0.04752
B	Quantile 1	GO:0032260	response to jasmonic acid stimulus involved in jasmonic acid and ethylene-dependent systemic resistance	31	7.46	12	0.04957
D	Quantile 1	GO:0009626	plant-type hypersensitive response	1864	440.01	603	1.8e-23
D	Quantile 1	GO:0050832	defense response to fungus	2356	556.15	751	8.9e-15
D	Quantile 1	GO:0006468	protein phosphorylation	2614	617.05	705	1.4e-13
D	Quantile 1	GO:0042631	cellular response to water deprivation	533	125.82	200	2.8e-13
D	Quantile 1	GO:0006952	defense response	6492	1532.48	1901	1.1e-12
D	Quantile 1	GO:0007165	signal transduction	5053	1192.79	1255	1.1e-09
D	Quantile 1	GO:0009817	defense response to fungus, incompatible interaction	357	84.27	136	1.2e-09
D	Quantile 1	GO:0009814	defense response, incompatible interaction	2612	616.58	812	2.8e-09
D	Quantile 1	GO:0010224	response to UV-B	847	199.94	272	6.4e-09
D	Quantile 1	GO:0015706	nitrate transport	690	162.88	235	6.7e-09
D	Quantile 1	GO:0009629	response to gravity	456	107.64	115	2.2e-08
D	Quantile 1	GO:0071249	cellular response to nitrate	29	6.85	21	3.7e-08
D	Quantile 1	GO:0031396	regulation of protein ubiquitination	133	31.4	57	7.7e-08
D	Quantile 1	GO:0010025	wax biosynthetic process	128	30.22	54	1e-07
D	Quantile 1	GO:0046713	borate transport	104	24.55	49	1.2e-07
D	Quantile 1	GO:0016045	detection of bacterium	339	80.02	122	1.7e-07
D	Quantile 1	GO:0080167	response to karrikin	973	229.68	297	2.9e-07
D	Quantile 1	GO:0052544	defense response by callose deposition in cell wall	596	140.69	194	3.3e-07
D	Quantile 1	GO:1990169	stress response to copper ion	27	6.37	19	3.5e-07
D	Quantile 1	GO:0080187	floral organ senescence	59	13.93	32	3.7e-07
D	Quantile 1	GO:0009611	response to wounding	1964	463.61	579	5.4e-07
D	Quantile 1	GO:0006915	apoptotic process	314	74.12	113	8.2e-07
D	Quantile 1	GO:0031348	negative regulation of defense response	1248	294.6	363	1.1e-06
D	Quantile 1	GO:0006511	ubiquitin-dependent protein catabolic process	1158	273.35	289	1.6e-06
D	Quantile 1	GO:0090059	protoxylem development	20	4.72	15	1.7e-06
D	Quantile 1	GO:0009851	auxin biosynthetic process	407	96.07	134	1.8e-06
D	Quantile 1	GO:0010623	programmed cell death involved in cell development	58	13.69	32	2e-06
D	Quantile 1	GO:0042742	defense response to bacterium	2357	556.39	672	2.6e-06
D	Quantile 1	GO:0055114	oxidation-reduction process	3062	722.8	773	2.7e-06
D	Quantile 1	GO:0009862	systemic acquired resistance, salicylic acid mediated signaling pathway	723	170.67	223	3.9e-06
D	Quantile 1	GO:2000071	regulation of defense response by callose deposition	30	7.08	19	4.1e-06
D	Quantile 1	GO:0009826	unidimensional cell growth	1338	315.84	316	4.6e-06
D	Quantile 1	GO:0009715	chalcone biosynthetic process	19	4.49	14	5.6e-06
D	Quantile 1	GO:0070988	demethylation	42	9.91	18	6.5e-06
D	Quantile 1	GO:0033609	oxalate metabolic process	60	14.16	30	7.8e-06
D	Quantile 1	GO:0009409	response to cold	3401	802.83	820	1.2e-05
D	Quantile 1	GO:0032259	methylation	1008	237.94	222	1.3e-05
D	Quantile 1	GO:0032260	response to jasmonic acid stimulus involved in jasmonic acid and ethylene-dependent systemic resistance	42	9.91	23	1.3e-05
D	Quantile 1	GO:0010167	response to nitrate	459	108.35	160	1.9e-05
D	Quantile 1	GO:0009694	jasmonic acid metabolic process	367	86.63	104	2.1e-05
D	Quantile 1	GO:0051555	flavonol biosynthetic process	210	49.57	74	2.9e-05
D	Quantile 1	GO:0016099	monoterpenoid biosynthetic process	7	1.65	7	4.1e-05
D	Quantile 1	GO:0006801	superoxide metabolic process	32	7.55	11	4.1e-05
D	Quantile 1	GO:0015824	proline transport	173	40.84	64	5.2e-05
D	Quantile 1	GO:0030639	polyketide biosynthetic process	17	4.01	12	5.4e-05
D	Quantile 1	GO:0000162	tryptophan biosynthetic process	204	48.16	73	5.8e-05
D	Quantile 1	GO:0048527	lateral root development	738	174.21	226	6.4e-05
D	Quantile 1	GO:0010497	plasmodesmata-mediated intercellular transport	66	15.58	30	7.9e-05
D	Quantile 1	GO:0009759	indole glucosinolate biosynthetic process	191	45.09	68	0.00012
D	Quantile 1	GO:0006569	tryptophan catabolic process	332	78.37	108	0.00012
D	Quantile 1	GO:0009625	response to insect	293	69.16	97	0.00013
D	Quantile 1	GO:0080027	response to herbivore	74	17.47	32	0.00015
D	Quantile 1	GO:0080148	negative regulation of response to water deprivation	65	15.34	29	0.00016
D	Quantile 1	GO:0019761	glucosinolate biosynthetic process	551	130.07	184	0.00021
D	Quantile 1	GO:0009812	flavonoid metabolic process	979	231.1	289	0.00023
D	Quantile 1	GO:0009813	flavonoid biosynthetic process	902	212.92	267	0.00024
D	Quantile 1	GO:1990110	callus formation	12	2.83	9	0.00024
D	Quantile 1	GO:0045493	xylan catabolic process	40	9.44	20	0.00025
D	Quantile 1	GO:0042593	glucose homeostasis	37	8.73	12	0.00026
D	Quantile 1	GO:0071472	cellular response to salt stress	363	85.69	122	0.00032
D	Quantile 1	GO:0009733	response to auxin	1375	324.58	352	0.00036
D	Quantile 1	GO:0002237	response to molecule of bacterial origin	251	59.25	82	0.00036
D	Quantile 1	GO:0009861	jasmonic acid and ethylene-dependent systemic resistance	105	24.79	51	0.00037
D	Quantile 1	GO:0060416	response to growth hormone	59	13.93	26	0.00042
D	Quantile 1	GO:0030187	melatonin biosynthetic process	53	12.51	24	0.00043
D	Quantile 1	GO:0009686	gibberellin biosynthetic process	142	33.52	54	0.00043
D	Quantile 1	GO:0009753	response to jasmonic acid	1365	322.22	382	0.00055
D	Quantile 1	GO:0042177	negative regulation of protein catabolic process	63	14.87	27	0.00057
D	Quantile 1	GO:0009697	salicylic acid biosynthetic process	353	83.33	110	0.00057
D	Quantile 1	GO:0009684	indoleacetic acid biosynthetic process	360	84.98	112	0.00064
D	Quantile 1	GO:0016131	brassinosteroid metabolic process	352	83.09	102	0.0007
D	Quantile 1	GO:0048578	positive regulation of long-day photoperiodism, flowering	18	4.25	11	0.00074
D	Quantile 1	GO:0046622	positive regulation of organ growth	174	41.07	60	0.00075
D	Quantile 1	GO:0051792	medium-chain fatty acid biosynthetic process	174	41.07	60	0.00075
D	Quantile 1	GO:0045491	xylan metabolic process	297	70.11	80	0.00078
D	Quantile 1	GO:0010981	regulation of cell wall macromolecule metabolic process	14	3.3	9	0.00078
D	Quantile 1	GO:0080110	sporopollenin biosynthetic process	231	54.53	76	0.0008
D	Quantile 1	GO:0042351	'de novo' GDP-L-fucose biosynthetic process	26	6.14	14	0.00083
D	Quantile 1	GO:0019605	butyrate metabolic process	9	2.12	7	0.00092
D	Quantile 1	GO:0000160	phosphorelay signal transduction system	636	150.13	170	0.00096
D	Quantile 1	GO:0007606	sensory perception of chemical stimulus	7	1.65	6	0.00096
D	Quantile 1	GO:0051762	sesquiterpene biosynthetic process	16	3.78	10	0.00102
D	Quantile 1	GO:0051607	defense response to virus	609	143.76	164	0.00102
D	Quantile 1	GO:0009556	microsporogenesis	295	69.64	93	0.0011
D	Quantile 1	GO:0019953	sexual reproduction	1022	241.25	273	0.00114
D	Quantile 1	GO:0009682	induced systemic resistance	333	78.61	95	0.00125
D	Quantile 1	GO:0048437	floral organ development	1511	356.68	377	0.00128
D	Quantile 1	GO:0009627	systemic acquired resistance	1781	420.42	523	0.0013
D	Quantile 1	GO:0048830	adventitious root development	192	45.32	64	0.00137
D	Quantile 1	GO:0048759	xylem vessel member cell differentiation	14	3.3	9	0.00139
D	Quantile 1	GO:0040009	regulation of growth rate	178	42.02	60	0.00141
D	Quantile 1	GO:0010016	shoot system morphogenesis	1146	270.52	308	0.00157
D	Quantile 1	GO:0009961	response to 1-aminocyclopropane-1-carboxylic acid	36	8.5	17	0.00163
D	Quantile 1	GO:0031540	regulation of anthocyanin biosynthetic process	36	8.5	17	0.00163
D	Quantile 1	GO:0009615	response to virus	779	183.89	221	0.00166
D	Quantile 1	GO:0009805	coumarin biosynthetic process	273	64.44	86	0.00169
D	Quantile 1	GO:0048316	seed development	2302	543.4	564	0.00169
D	Quantile 1	GO:0009816	defense response to bacterium, incompatible interaction	505	119.21	147	0.0018
D	Quantile 1	GO:0090058	metaxylem development	12	2.83	8	0.00187
D	Quantile 1	GO:0016106	sesquiterpenoid biosynthetic process	115	27.15	35	0.00193
D	Quantile 1	GO:0010082	regulation of root meristem growth	97	22.9	36	0.00194
D	Quantile 1	GO:0045338	farnesyl diphosphate metabolic process	24	5.67	11	0.00195
D	Quantile 1	GO:0010363	regulation of plant-type hypersensitive response	1067	251.87	292	0.00212
D	Quantile 1	GO:0002215	defense response to nematode	49	11.57	21	0.00225
D	Quantile 1	GO:0010106	cellular response to iron ion starvation	325	76.72	99	0.00262
D	Quantile 1	GO:0015996	chlorophyll catabolic process	72	17	28	0.0027
D	Quantile 1	GO:1901348	positive regulation of secondary cell wall biogenesis	15	3.54	9	0.00274
D	Quantile 1	GO:0002229	defense response to oomycetes	280	66.1	90	0.00275
D	Quantile 1	GO:2000083	negative regulation of L-ascorbic acid biosynthetic process	109	25.73	39	0.00279
D	Quantile 1	GO:0010338	leaf formation	183	43.2	60	0.00291
D	Quantile 1	GO:0042128	nitrate assimilation	93	21.95	34	0.00297
D	Quantile 1	GO:0006005	L-fucose biosynthetic process	8	1.89	6	0.00308
D	Quantile 1	GO:0006527	arginine catabolic process	7	1.65	5	0.0031
D	Quantile 1	GO:0009911	positive regulation of flower development	353	83.33	106	0.00314
D	Quantile 1	GO:0010114	response to red light	482	113.78	132	0.00329
D	Quantile 1	GO:1901527	abscisic acid-activated signaling pathway involved in stomatal movement	350	82.62	105	0.00338
D	Quantile 1	GO:1900140	regulation of seedling development	399	94.19	116	0.00351
D	Quantile 1	GO:0070291	N-acylethanolamine metabolic process	6	1.42	5	0.00353
D	Quantile 1	GO:0009735	response to cytokinin	655	154.62	181	0.00356
D	Quantile 1	GO:0006865	amino acid transport	487	114.96	144	0.00357
D	Quantile 1	GO:0098656	anion transmembrane transport	718	169.49	192	0.00363
D	Quantile 1	GO:0010150	leaf senescence	436	102.92	129	0.00383
D	Quantile 1	GO:0009704	de-etiolation	77	18.18	29	0.00398
D	Quantile 1	GO:0006744	ubiquinone biosynthetic process	218	51.46	69	0.00399
D	Quantile 1	GO:0019253	reductive pentose-phosphate cycle	23	5.43	12	0.00399
D	Quantile 1	GO:0009308	amine metabolic process	686	161.93	215	0.00431
D	Quantile 1	GO:0019745	pentacyclic triterpenoid biosynthetic process	45	10.62	19	0.00437
D	Quantile 1	GO:0009086	methionine biosynthetic process	152	35.88	52	0.00438
D	Quantile 1	GO:0006598	polyamine catabolic process	61	14.4	24	0.00442
D	Quantile 1	GO:0009641	shade avoidance	212	50.04	67	0.00468
D	Quantile 1	GO:0010480	microsporocyte differentiation	238	56.18	74	0.00485
D	Quantile 1	GO:0051260	protein homooligomerization	336	79.31	99	0.00491
D	Quantile 1	GO:0010951	negative regulation of endopeptidase activity	76	17.94	27	0.00492
D	Quantile 1	GO:0060548	negative regulation of cell death	526	124.17	133	0.00503
D	Quantile 1	GO:0010260	animal organ senescence	75	17.7	28	0.0053
D	Quantile 1	GO:0009115	xanthine catabolic process	11	2.6	7	0.00537
D	Quantile 1	GO:0009742	brassinosteroid mediated signaling pathway	524	123.69	153	0.00552
D	Quantile 1	GO:0018874	benzoate metabolic process	106	25.02	37	0.00561
D	Quantile 1	GO:0071475	cellular hyperosmotic salinity response	106	25.02	37	0.00561
D	Quantile 1	GO:0010112	regulation of systemic acquired resistance	226	53.35	70	0.00571
D	Quantile 1	GO:0022603	regulation of anatomical structure morphogenesis	591	139.51	151	0.00573
D	Quantile 1	GO:0007172	signal complex assembly	236	55.71	73	0.00587
D	Quantile 1	GO:0010234	anther wall tapetum cell fate specification	236	55.71	73	0.00587
D	Quantile 1	GO:0090548	response to nitrate starvation	236	55.71	73	0.00587
D	Quantile 1	GO:1901528	hydrogen peroxide mediated signaling pathway involved in stomatal movement	236	55.71	73	0.00587
D	Quantile 1	GO:1902025	nitrate import	236	55.71	73	0.00587
D	Quantile 1	GO:2000604	negative regulation of secondary growth	236	55.71	73	0.00587
D	Quantile 1	GO:0009751	response to salicylic acid	1832	432.46	508	0.00646
D	Quantile 1	GO:0048281	inflorescence morphogenesis	248	58.54	76	0.00646
D	Quantile 1	GO:0006898	receptor-mediated endocytosis	256	60.43	78	0.00654
D	Quantile 1	GO:0009945	radial axis specification	237	55.95	73	0.00656
D	Quantile 1	GO:0042493	response to drug	3471	819.35	959	0.00662
D	Quantile 1	GO:0010483	pollen tube reception	28	6.61	13	0.00676
D	Quantile 1	GO:0031640	killing of cells of other organism	31	7.32	14	0.00678
D	Quantile 1	GO:0010584	pollen exine formation	548	129.36	170	0.00684
D	Quantile 1	GO:0010067	procambium histogenesis	245	57.83	75	0.00698
D	Quantile 1	GO:0010310	regulation of hydrogen peroxide metabolic process	349	82.38	103	0.00716
D	Quantile 1	GO:2000027	regulation of animal organ morphogenesis	270	63.74	85	0.00719
D	Quantile 1	GO:0010268	brassinosteroid homeostasis	279	65.86	84	0.00727
D	Quantile 1	GO:0010068	protoderm histogenesis	238	56.18	73	0.00731
D	Quantile 1	GO:1901529	positive regulation of anion channel activity	238	56.18	73	0.00731
D	Quantile 1	GO:0051603	proteolysis involved in cellular protein catabolic process	1388	327.65	354	0.00809
D	Quantile 1	GO:0009821	alkaloid biosynthetic process	17	4.01	9	0.00835
D	Quantile 1	GO:2000029	regulation of proanthocyanidin biosynthetic process	17	4.01	9	0.00835
D	Quantile 1	GO:0046482	para-aminobenzoic acid metabolic process	195	46.03	61	0.00851
D	Quantile 1	GO:0010223	secondary shoot formation	268	63.26	82	0.0086
D	Quantile 1	GO:0070370	cellular heat acclimation	266	62.79	80	0.00887
D	Quantile 1	GO:0030155	regulation of cell adhesion	240	56.65	73	0.00905
D	Quantile 1	GO:0010304	PSII associated light-harvesting complex II catabolic process	29	6.85	13	0.00965
D	Quantile 1	GO:0009934	regulation of meristem structural organization	267	63.03	80	0.00979
D	Quantile 1	GO:0034976	response to endoplasmic reticulum stress	901	212.69	224	0.00982
D	Quantile 1	GO:0007530	sex determination	7	1.65	5	0.00994
D	Quantile 1	GO:0052696	flavonoid glucuronidation	230	54.29	70	0.01025
D	Quantile 1	GO:0048645	animal organ formation	292	68.93	89	0.01095
D	Quantile 1	GO:0040008	regulation of growth	1272	300.26	309	0.0119
D	Quantile 1	GO:0048564	photosystem I assembly	15	3.54	8	0.01215
D	Quantile 1	GO:0009432	SOS response	5	1.18	4	0.01259
D	Quantile 1	GO:0010585	glutamine secretion	5	1.18	4	0.01259
D	Quantile 1	GO:0015720	allantoin transport	5	1.18	4	0.01259
D	Quantile 1	GO:0080143	regulation of amino acid export	5	1.18	4	0.01259
D	Quantile 1	GO:0080024	indolebutyric acid metabolic process	111	26.2	37	0.01264
D	Quantile 1	GO:0009867	jasmonic acid mediated signaling pathway	625	147.54	158	0.01277
D	Quantile 1	GO:0009942	longitudinal axis specification	251	59.25	75	0.01288
D	Quantile 1	GO:0009446	putrescine biosynthetic process	7	1.65	4	0.01315
D	Quantile 1	GO:0019853	L-ascorbic acid biosynthetic process	141	33.28	52	0.01319
D	Quantile 1	GO:0090057	root radial pattern formation	18	4.25	9	0.01325
D	Quantile 1	GO:0009729	detection of brassinosteroid stimulus	244	57.6	73	0.01356
D	Quantile 1	GO:0010266	response to vitamin B1	21	4.96	10	0.01378
D	Quantile 1	GO:0010231	maintenance of seed dormancy	222	52.4	67	0.0143
D	Quantile 1	GO:0010075	regulation of meristem growth	678	160.05	195	0.01453
D	Quantile 1	GO:0010227	floral organ abscission	275	64.92	81	0.01458
D	Quantile 1	GO:0035336	long-chain fatty-acyl-CoA metabolic process	10	2.36	6	0.01482
D	Quantile 1	GO:0009407	toxin catabolic process	314	74.12	91	0.01577
D	Quantile 1	GO:0017148	negative regulation of translation	58	13.69	22	0.01598
D	Quantile 1	GO:0010119	regulation of stomatal movement	269	63.5	70	0.01602
D	Quantile 1	GO:0010089	xylem development	576	135.97	168	0.01622
D	Quantile 1	GO:0070301	cellular response to hydrogen peroxide	120	28.33	39	0.01649
D	Quantile 1	GO:0009650	UV protection	250	59.01	74	0.01678
D	Quantile 1	GO:0007169	transmembrane receptor protein tyrosine kinase signaling pathway	548	129.36	151	0.01702
D	Quantile 1	GO:0006979	response to oxidative stress	2156	508.94	563	0.01863
D	Quantile 1	GO:0010583	response to cyclopentenone	176	41.55	54	0.01869
D	Quantile 1	GO:0010103	stomatal complex morphogenesis	386	91.12	106	0.0187
D	Quantile 1	GO:0042542	response to hydrogen peroxide	762	179.88	213	0.01949
D	Quantile 1	GO:0009698	phenylpropanoid metabolic process	1073	253.29	300	0.01974
D	Quantile 1	GO:0009749	response to glucose	416	98.2	113	0.01983
D	Quantile 1	GO:0001944	vasculature development	290	68.46	84	0.01992
D	Quantile 1	GO:0000165	MAPK cascade	440	103.86	118	0.01999
D	Quantile 1	GO:0010148	transpiration	252	59.49	74	0.02017
D	Quantile 1	GO:0001558	regulation of cell growth	535	126.29	123	0.02034
D	Quantile 1	GO:0009553	embryo sac development	923	217.88	233	0.02078
D	Quantile 1	GO:0016124	xanthophyll catabolic process	8	1.89	5	0.02137
D	Quantile 1	GO:0046741	transport of virus in host, tissue to tissue	8	1.89	5	0.02137
D	Quantile 1	GO:0048730	epidermis morphogenesis	8	1.89	5	0.02137
D	Quantile 1	GO:1901684	arsenate ion transmembrane transport	8	1.89	5	0.02137
D	Quantile 1	GO:0009691	cytokinin biosynthetic process	48	11.33	18	0.02162
D	Quantile 1	GO:0006749	glutathione metabolic process	122	28.8	39	0.02162
D	Quantile 1	GO:0042398	cellular modified amino acid biosynthetic process	101	23.84	31	0.0217
D	Quantile 1	GO:0010120	camalexin biosynthetic process	234	55.24	69	0.02207
D	Quantile 1	GO:0042335	cuticle development	375	88.52	106	0.02303
D	Quantile 1	GO:0051707	response to other organism	5589	1319.32	1589	0.02448
D	Quantile 1	GO:0009808	lignin metabolic process	706	166.66	185	0.02588
D	Quantile 1	GO:0045851	pH reduction	259	61.14	74	0.02827
D	Quantile 1	GO:0048658	anther wall tapetum development	310	73.18	98	0.02836
D	Quantile 1	GO:0010152	pollen maturation	260	61.37	75	0.02902
D	Quantile 1	GO:0010311	lateral root formation	241	56.89	70	0.02939
D	Quantile 1	GO:0010286	heat acclimation	585	138.09	170	0.02979
D	Quantile 1	GO:0009595	detection of biotic stimulus	554	130.78	184	0.02986
D	Quantile 1	GO:0010102	lateral root morphogenesis	502	118.5	145	0.03022
D	Quantile 1	GO:0008219	cell death	2304	543.87	733	0.03031
D	Quantile 1	GO:0010390	histone monoubiquitination	6	1.42	4	0.0307
D	Quantile 1	GO:0048505	regulation of timing of cell differentiation	6	1.42	4	0.0307
D	Quantile 1	GO:0090358	positive regulation of tryptophan metabolic process	6	1.42	4	0.0307
D	Quantile 1	GO:0090355	positive regulation of auxin metabolic process	11	2.6	5	0.0307
D	Quantile 1	GO:0009561	megagametogenesis	548	129.36	126	0.03119
D	Quantile 1	GO:0009944	polarity specification of adaxial/abaxial axis	354	83.56	99	0.03168
D	Quantile 1	GO:2000280	regulation of root development	304	71.76	84	0.03412
D	Quantile 1	GO:0042178	xenobiotic catabolic process	93	21.95	30	0.03568
D	Quantile 1	GO:0010439	regulation of glucosinolate biosynthetic process	27	6.37	11	0.03597
D	Quantile 1	GO:0010198	synergid death	9	2.12	5	0.03884
D	Quantile 1	GO:0016121	carotene catabolic process	9	2.12	5	0.03884
D	Quantile 1	GO:0051502	diterpene phytoalexin biosynthetic process	9	2.12	5	0.03884
D	Quantile 1	GO:0010204	defense response signaling pathway, resistance gene-independent	283	66.8	80	0.03899
D	Quantile 1	GO:0006826	iron ion transport	215	50.75	63	0.03901
D	Quantile 1	GO:0009628	response to abiotic stimulus	9005	2125.69	2255	0.03989
D	Quantile 1	GO:0009567	double fertilization forming a zygote and endosperm	102	24.08	35	0.04007
D	Quantile 1	GO:0009854	oxidative photosynthetic carbon pathway	12	2.83	6	0.04203
D	Quantile 1	GO:0080028	nitrile biosynthetic process	12	2.83	6	0.04203
D	Quantile 1	GO:0010023	proanthocyanidin biosynthetic process	58	13.69	24	0.04233
D	Quantile 1	GO:0031408	oxylipin biosynthetic process	98	23.13	31	0.0428
D	Quantile 1	GO:0001732	formation of cytoplasmic translation initiation complex	4	0.94	3	0.04329
D	Quantile 1	GO:0006659	phosphatidylserine biosynthetic process	4	0.94	3	0.04329
D	Quantile 1	GO:0010378	temperature compensation of the circadian clock	4	0.94	3	0.04329
D	Quantile 1	GO:0015690	aluminum cation transport	4	0.94	3	0.04329
D	Quantile 1	GO:0042425	choline biosynthetic process	4	0.94	3	0.04329
D	Quantile 1	GO:0046256	2,4,6-trinitrotoluene catabolic process	4	0.94	3	0.04329
D	Quantile 1	GO:0080064	4,4-dimethyl-9beta,19-cyclopropylsterol oxidation	4	0.94	3	0.04329
D	Quantile 1	GO:0051238	sequestering of metal ion	57	13.46	17	0.04356
D	Quantile 1	GO:0009831	plant-type cell wall modification involved in multidimensional cell growth	73	17.23	24	0.04547
D	Quantile 1	GO:0048481	plant ovule development	538	127	144	0.04651
D	Quantile 1	GO:0009809	lignin biosynthetic process	433	102.21	106	0.04675
D	Quantile 1	GO:0045088	regulation of innate immune response	1790	422.54	495	0.04716
D	Quantile 1	GO:0009740	gibberellic acid mediated signaling pathway	178	42.02	51	0.04814
All	Quantile 2	GO:0031146	SCF-dependent proteasomal ubiquitin-dependent protein catabolic process	724	176.56	247	2.3e-09
All	Quantile 2	GO:1901527	abscisic acid-activated signaling pathway involved in stomatal movement	958	233.62	314	2.4e-09
All	Quantile 2	GO:0010266	response to vitamin B1	55	13.41	34	4.2e-09
All	Quantile 2	GO:0045851	pH reduction	700	170.7	236	9.6e-09
All	Quantile 2	GO:0006979	response to oxidative stress	6358	1550.48	1684	1.4e-08
All	Quantile 2	GO:0048544	recognition of pollen	547	133.39	182	5.5e-07
All	Quantile 2	GO:0009934	regulation of meristem structural organization	735	179.24	237	8.1e-07
All	Quantile 2	GO:0050832	defense response to fungus	6917	1686.8	1872	9.5e-07
All	Quantile 2	GO:0009808	lignin metabolic process	1968	479.92	538	9.7e-07
All	Quantile 2	GO:0009664	plant-type cell wall organization	2471	602.58	630	1.1e-06
All	Quantile 2	GO:0009942	longitudinal axis specification	678	165.34	220	1.2e-06
All	Quantile 2	GO:0042631	cellular response to water deprivation	1610	392.62	475	1.3e-06
All	Quantile 2	GO:0010227	floral organ abscission	752	183.38	240	1.7e-06
All	Quantile 2	GO:0060548	negative regulation of cell death	1481	361.16	416	2.2e-06
All	Quantile 2	GO:0010068	protoderm histogenesis	641	156.32	207	3.4e-06
All	Quantile 2	GO:0009945	radial axis specification	638	155.58	206	3.7e-06
All	Quantile 2	GO:0009755	hormone-mediated signaling pathway	8267	2016.01	2196	3.8e-06
All	Quantile 2	GO:0007172	signal complex assembly	635	154.85	205	3.9e-06
All	Quantile 2	GO:0010234	anther wall tapetum cell fate specification	635	154.85	205	3.9e-06
All	Quantile 2	GO:0090548	response to nitrate starvation	635	154.85	205	3.9e-06
All	Quantile 2	GO:1901528	hydrogen peroxide mediated signaling pathway involved in stomatal movement	635	154.85	205	3.9e-06
All	Quantile 2	GO:1902025	nitrate import	635	154.85	205	3.9e-06
All	Quantile 2	GO:2000604	negative regulation of secondary growth	635	154.85	205	3.9e-06
All	Quantile 2	GO:2000027	regulation of animal organ morphogenesis	737	179.73	216	4e-06
All	Quantile 2	GO:0030155	regulation of cell adhesion	646	157.54	208	4e-06
All	Quantile 2	GO:0001944	vasculature development	797	194.36	250	4.3e-06
All	Quantile 2	GO:0071398	cellular response to fatty acid	25	6.1	17	5.1e-06
All	Quantile 2	GO:0010102	lateral root morphogenesis	1406	342.87	399	5.1e-06
All	Quantile 2	GO:0010480	microsporocyte differentiation	641	156.32	206	5.1e-06
All	Quantile 2	GO:1901529	positive regulation of anion channel activity	641	156.32	206	5.1e-06
All	Quantile 2	GO:0009729	detection of brassinosteroid stimulus	659	160.71	211	5.3e-06
All	Quantile 2	GO:0006898	receptor-mediated endocytosis	698	170.22	213	5.6e-06
All	Quantile 2	GO:0009845	seed germination	1986	484.31	561	5.9e-06
All	Quantile 2	GO:0048645	animal organ formation	807	196.8	227	6.7e-06
All	Quantile 2	GO:0009693	ethylene biosynthetic process	579	141.2	186	7.5e-06
All	Quantile 2	GO:0048511	rhythmic process	1101	268.49	275	7.5e-06
All	Quantile 2	GO:0010148	transpiration	691	168.51	219	7.6e-06
All	Quantile 2	GO:0006883	cellular sodium ion homeostasis	83	20.24	38	7.7e-06
All	Quantile 2	GO:0071732	cellular response to nitric oxide	208	50.72	79	9e-06
All	Quantile 2	GO:0071446	cellular response to salicylic acid stimulus	3263	795.72	872	9.1e-06
All	Quantile 2	GO:0048235	pollen sperm cell differentiation	668	162.9	212	9.5e-06
All	Quantile 2	GO:0016045	detection of bacterium	944	230.21	288	1e-05
All	Quantile 2	GO:0051607	defense response to virus	1757	428.47	483	1e-05
All	Quantile 2	GO:1901430	positive regulation of syringal lignin biosynthetic process	105	25.61	46	1e-05
All	Quantile 2	GO:1900140	regulation of seedling development	1120	273.13	332	1e-05
All	Quantile 2	GO:0009626	plant-type hypersensitive response	5684	1386.12	1565	1.1e-05
All	Quantile 2	GO:0007169	transmembrane receptor protein tyrosine kinase signaling pathway	1566	381.89	455	1.1e-05
All	Quantile 2	GO:0009627	systemic acquired resistance	5436	1325.64	1469	1.2e-05
All	Quantile 2	GO:0071472	cellular response to salt stress	1096	267.27	339	1.5e-05
All	Quantile 2	GO:0042493	response to drug	10199	2487.15	2580	1.5e-05
All	Quantile 2	GO:0052696	flavonoid glucuronidation	709	172.9	222	1.6e-05
All	Quantile 2	GO:0009734	auxin-activated signaling pathway	1614	393.59	462	1.8e-05
All	Quantile 2	GO:0070370	cellular heat acclimation	722	176.07	225	2e-05
All	Quantile 2	GO:0010268	brassinosteroid homeostasis	759	185.09	235	2.1e-05
All	Quantile 2	GO:0010067	procambium histogenesis	665	162.17	209	2.2e-05
All	Quantile 2	GO:0010089	xylem development	1641	400.18	467	2.3e-05
All	Quantile 2	GO:0009650	UV protection	677	165.09	212	2.4e-05
All	Quantile 2	GO:0001558	regulation of cell growth	1521	370.92	400	2.8e-05
All	Quantile 2	GO:0007585	respiratory gaseous exchange	16	3.9	12	2.9e-05
All	Quantile 2	GO:0071260	cellular response to mechanical stimulus	73	17.8	34	3e-05
All	Quantile 2	GO:0071311	cellular response to acetate	73	17.8	34	3e-05
All	Quantile 2	GO:0010230	alternative respiration	14	3.41	11	3.1e-05
All	Quantile 2	GO:0000165	MAPK cascade	1323	322.63	366	3.4e-05
All	Quantile 2	GO:1990641	response to iron ion starvation	23	5.61	15	4e-05
All	Quantile 2	GO:0010152	pollen maturation	711	173.39	220	4e-05
All	Quantile 2	GO:0048281	inflorescence morphogenesis	678	165.34	212	4.1e-05
All	Quantile 2	GO:0044249	cellular biosynthetic process	30671	7479.51	7333	4.1e-05
All	Quantile 2	GO:2000117	negative regulation of cysteine-type endopeptidase activity	21	5.12	14	5e-05
All	Quantile 2	GO:0010223	secondary shoot formation	745	181.68	227	5.3e-05
All	Quantile 2	GO:0010204	defense response signaling pathway, resistance gene-independent	792	193.14	241	5.9e-05
All	Quantile 2	GO:0010363	regulation of plant-type hypersensitive response	3289	802.06	894	6.5e-05
All	Quantile 2	GO:0031571	mitotic G1 DNA damage checkpoint	58	14.14	28	6.7e-05
All	Quantile 2	GO:0051260	protein homooligomerization	939	228.99	285	8.1e-05
All	Quantile 2	GO:0009556	microsporogenesis	807	196.8	244	8.4e-05
All	Quantile 2	GO:0071230	cellular response to amino acid stimulus	85	20.73	37	8.5e-05
All	Quantile 2	GO:0002764	immune response-regulating signaling pathway	560	136.56	144	0.0001
All	Quantile 2	GO:0046777	protein autophosphorylation	3189	777.68	865	0.00012
All	Quantile 2	GO:0009864	induced systemic resistance, jasmonic acid mediated signaling pathway	199	48.53	72	0.00013
All	Quantile 2	GO:0030007	cellular potassium ion homeostasis	166	40.48	62	0.00014
All	Quantile 2	GO:0051302	regulation of cell division	941	229.47	265	0.00014
All	Quantile 2	GO:0034976	response to endoplasmic reticulum stress	2677	652.82	717	0.00016
All	Quantile 2	GO:0006624	vacuolar protein processing	38	9.27	20	0.00016
All	Quantile 2	GO:0010468	regulation of gene expression	13974	3407.74	3417	0.0002
All	Quantile 2	GO:0030026	cellular manganese ion homeostasis	67	16.34	30	0.00021
All	Quantile 2	GO:0015846	polyamine transport	30	7.32	11	0.00021
All	Quantile 2	GO:0042177	negative regulation of protein catabolic process	156	38.04	58	0.00025
All	Quantile 2	GO:0000226	microtubule cytoskeleton organization	1705	415.79	451	0.00026
All	Quantile 2	GO:0098869	cellular oxidant detoxification	265	64.62	91	0.00029
All	Quantile 2	GO:0035235	ionotropic glutamate receptor signaling pathway	90	21.95	37	0.00035
All	Quantile 2	GO:0031348	negative regulation of defense response	3647	889.37	971	0.00036
All	Quantile 2	GO:1902609	(R)-2-hydroxy-alpha-linolenic acid biosynthetic process	19	4.63	12	0.00038
All	Quantile 2	GO:0010310	regulation of hydrogen peroxide metabolic process	1026	250.2	298	0.00038
All	Quantile 2	GO:0009826	unidimensional cell growth	3880	946.19	943	0.00042
All	Quantile 2	GO:0009553	embryo sac development	2643	644.53	730	0.00043
All	Quantile 2	GO:0010030	positive regulation of seed germination	186	45.36	66	0.00046
All	Quantile 2	GO:0031396	regulation of protein ubiquitination	355	86.57	111	0.00059
All	Quantile 2	GO:0010224	response to UV-B	2427	591.85	658	0.0006
All	Quantile 2	GO:2000122	negative regulation of stomatal complex development	30	7.32	16	0.00061
All	Quantile 2	GO:0042744	hydrogen peroxide catabolic process	687	167.53	205	0.00062
All	Quantile 2	GO:0042549	photosystem II stabilization	33	8.05	17	0.0007
All	Quantile 2	GO:0009944	polarity specification of adaxial/abaxial axis	981	239.23	283	0.00073
All	Quantile 2	GO:0006952	defense response	19730	4811.41	5181	0.00082
All	Quantile 2	GO:0048481	plant ovule development	1500	365.79	412	0.00089
All	Quantile 2	GO:0008299	isoprenoid biosynthetic process	2129	519.18	453	0.00089
All	Quantile 2	GO:0052544	defense response by callose deposition in cell wall	1652	402.86	458	0.0009
All	Quantile 2	GO:0010584	pollen exine formation	1521	370.92	395	0.00095
All	Quantile 2	GO:0006334	nucleosome assembly	428	104.37	132	0.00096
All	Quantile 2	GO:0009268	response to pH	61	14.88	16	0.001
All	Quantile 2	GO:0080027	response to herbivore	215	52.43	73	0.001
All	Quantile 2	GO:0009816	defense response to bacterium, incompatible interaction	1435	349.94	398	0.00105
All	Quantile 2	GO:0016567	protein ubiquitination	4389	1070.31	1171	0.00112
All	Quantile 2	GO:0006212	uracil catabolic process	9	2.19	7	0.00114
All	Quantile 2	GO:0019483	beta-alanine biosynthetic process	9	2.19	7	0.00114
All	Quantile 2	GO:0045088	regulation of innate immune response	5354	1305.64	1467	0.00126
All	Quantile 2	GO:0071456	cellular response to hypoxia	462	112.66	139	0.00132
All	Quantile 2	GO:0051016	barbed-end actin filament capping	52	12.68	23	0.00136
All	Quantile 2	GO:0009753	response to jasmonic acid	3963	966.43	1061	0.00138
All	Quantile 2	GO:0009960	endosperm development	1042	254.1	296	0.00142
All	Quantile 2	GO:0006857	oligopeptide transport	666	162.41	171	0.00158
All	Quantile 2	GO:0070588	calcium ion transmembrane transport	187	45.6	64	0.00158
All	Quantile 2	GO:0006468	protein phosphorylation	7806	1903.59	2051	0.00167
All	Quantile 2	GO:0009920	cell plate formation involved in plant-type cell wall biogenesis	325	79.26	103	0.00168
All	Quantile 2	GO:0006880	intracellular sequestering of iron ion	44	10.73	20	0.00183
All	Quantile 2	GO:1900000	regulation of anthocyanin catabolic process	273	66.57	88	0.00202
All	Quantile 2	GO:0006874	cellular calcium ion homeostasis	151	36.82	51	0.00215
All	Quantile 2	GO:0042742	defense response to bacterium	6869	1675.09	1817	0.00221
All	Quantile 2	GO:0002679	respiratory burst involved in defense response	1140	278	320	0.00224
All	Quantile 2	GO:0010305	leaf vascular tissue pattern formation	1003	244.59	284	0.00228
All	Quantile 2	GO:0009696	salicylic acid metabolic process	1459	355.8	407	0.00229
All	Quantile 2	GO:0030834	regulation of actin filament depolymerization	76	18.53	31	0.00234
All	Quantile 2	GO:0009620	response to fungus	8614	2100.63	2344	0.00252
All	Quantile 2	GO:0009817	defense response to fungus, incompatible interaction	1030	251.18	290	0.00253
All	Quantile 2	GO:0042178	xenobiotic catabolic process	275	67.06	88	0.00255
All	Quantile 2	GO:1990069	stomatal opening	192	46.82	41	0.00257
All	Quantile 2	GO:0080156	mitochondrial mRNA modification	156	38.04	54	0.00264
All	Quantile 2	GO:0010103	stomatal complex morphogenesis	1082	263.86	304	0.0027
All	Quantile 2	GO:0006605	protein targeting	3133	764.02	733	0.00299
All	Quantile 2	GO:2001142	nicotinate transport	10	2.44	7	0.003
All	Quantile 2	GO:2001143	N-methylnicotinate transport	10	2.44	7	0.003
All	Quantile 2	GO:0009862	systemic acquired resistance, salicylic acid mediated signaling pathway	2187	533.33	588	0.00338
All	Quantile 2	GO:0009856	pollination	3539	863.03	910	0.00341
All	Quantile 2	GO:0009742	brassinosteroid mediated signaling pathway	1485	362.14	399	0.00342
All	Quantile 2	GO:0031930	mitochondria-nucleus signaling pathway	37	9.02	17	0.00343
All	Quantile 2	GO:0009561	megagametogenesis	1599	389.94	428	0.00349
All	Quantile 2	GO:0030833	regulation of actin filament polymerization	459	111.93	120	0.00349
All	Quantile 2	GO:0046168	glycerol-3-phosphate catabolic process	15	3.66	9	0.00349
All	Quantile 2	GO:0015976	carbon utilization	24	5.85	11	0.00349
All	Quantile 2	GO:0030001	metal ion transport	3428	835.96	811	0.0039
All	Quantile 2	GO:0012501	programmed cell death	6689	1631.2	1822	0.00392
All	Quantile 2	GO:0071421	manganese ion transmembrane transport	62	15.12	25	0.00403
All	Quantile 2	GO:0065004	protein-DNA complex assembly	563	137.29	170	0.00409
All	Quantile 2	GO:0019323	pentose catabolic process	9	2.19	6	0.00412
All	Quantile 2	GO:0006792	regulation of sulfur utilization	6	1.46	5	0.00412
All	Quantile 2	GO:0045717	negative regulation of fatty acid biosynthetic process	6	1.46	5	0.00412
All	Quantile 2	GO:1904030	negative regulation of cyclin-dependent protein kinase activity	66	16.09	10	0.00413
All	Quantile 2	GO:0016131	brassinosteroid metabolic process	1001	244.11	249	0.0046
All	Quantile 2	GO:0032973	amino acid export across plasma membrane	50	12.19	20	0.00476
All	Quantile 2	GO:0006869	lipid transport	770	187.77	203	0.00496
All	Quantile 2	GO:0006750	glutathione biosynthetic process	21	5.12	11	0.00524
All	Quantile 2	GO:0010492	maintenance of shoot apical meristem identity	73	17.8	28	0.00558
All	Quantile 2	GO:0042335	cuticle development	1022	249.23	284	0.00569
All	Quantile 2	GO:0009911	positive regulation of flower development	974	237.52	272	0.0059
All	Quantile 2	GO:0046916	cellular transition metal ion homeostasis	1401	341.65	379	0.00616
All	Quantile 2	GO:0071475	cellular hyperosmotic salinity response	305	74.38	94	0.00621
All	Quantile 2	GO:0009901	anther dehiscence	773	188.51	219	0.0064
All	Quantile 2	GO:0016139	glycoside catabolic process	337	82.18	113	0.00643
All	Quantile 2	GO:0010654	apical cell fate commitment	11	2.68	7	0.00652
All	Quantile 2	GO:0010608	posttranscriptional regulation of gene expression	1519	370.43	368	0.00654
All	Quantile 2	GO:0009414	response to water deprivation	7096	1730.45	1881	0.00655
All	Quantile 2	GO:0009727	detection of ethylene stimulus	39	9.51	17	0.00663
All	Quantile 2	GO:0071490	cellular response to far red light	122	29.75	41	0.00664
All	Quantile 2	GO:0071491	cellular response to red light	124	30.24	36	0.00666
All	Quantile 2	GO:0071281	cellular response to iron ion	273	66.57	85	0.00667
All	Quantile 2	GO:0009943	adaxial/abaxial axis specification	1000	243.86	293	0.00727
All	Quantile 2	GO:0051555	flavonol biosynthetic process	594	144.85	170	0.00772
All	Quantile 2	GO:0009581	detection of external stimulus	394	96.08	103	0.00775
All	Quantile 2	GO:0043900	regulation of multi-organism process	1943	473.83	506	0.00807
All	Quantile 2	GO:0006171	cAMP biosynthetic process	105	25.61	37	0.00826
All	Quantile 2	GO:0009698	phenylpropanoid metabolic process	3071	748.9	804	0.00834
All	Quantile 2	GO:0030397	membrane disassembly	43	10.49	18	0.00872
All	Quantile 2	GO:0010245	radial microtubular system formation	9	2.19	6	0.00878
All	Quantile 2	GO:0016540	protein autoprocessing	9	2.19	6	0.00878
All	Quantile 2	GO:1990067	intrachromosomal DNA recombination	9	2.19	6	0.00878
All	Quantile 2	GO:0048445	carpel morphogenesis	58	14.14	17	0.00878
All	Quantile 2	GO:0006617	SRP-dependent cotranslational protein targeting to membrane, signal sequence recognition	14	3.41	8	0.0088
All	Quantile 2	GO:0010220	positive regulation of vernalization response	14	3.41	8	0.0088
All	Quantile 2	GO:0090451	cotyledon boundary formation	14	3.41	8	0.0088
All	Quantile 2	GO:0050688	regulation of defense response to virus	80	19.51	19	0.00881
All	Quantile 2	GO:0018874	benzoate metabolic process	305	74.38	93	0.00884
All	Quantile 2	GO:0046482	para-aminobenzoic acid metabolic process	561	136.81	160	0.00966
All	Quantile 2	GO:0070301	cellular response to hydrogen peroxide	344	83.89	104	0.01046
All	Quantile 2	GO:0009947	centrolateral axis specification	17	4.15	9	0.01046
All	Quantile 2	GO:0010865	stipule development	17	4.15	9	0.01046
All	Quantile 2	GO:0046938	phytochelatin biosynthetic process	17	4.15	9	0.01046
All	Quantile 2	GO:0051103	DNA ligation involved in DNA repair	17	4.15	9	0.01046
All	Quantile 2	GO:0043562	cellular response to nitrogen levels	668	162.9	187	0.01068
All	Quantile 2	GO:0000966	RNA 5'-end processing	111	27.07	38	0.01082
All	Quantile 2	GO:0070828	heterochromatin organization	175	42.68	51	0.01084
All	Quantile 2	GO:0071492	cellular response to UV-A	47	11.46	19	0.011
All	Quantile 2	GO:0006351	transcription, DNA-templated	13187	3215.82	3180	0.01103
All	Quantile 2	GO:0009697	salicylic acid biosynthetic process	1043	254.35	284	0.01133
All	Quantile 2	GO:0006817	phosphate ion transport	137	33.41	42	0.01186
All	Quantile 2	GO:0071158	positive regulation of cell cycle arrest	12	2.93	7	0.01238
All	Quantile 2	GO:1900366	negative regulation of defense response to insect	54	13.17	21	0.01274
All	Quantile 2	GO:0010623	programmed cell death involved in cell development	159	38.77	48	0.01371
All	Quantile 2	GO:0010582	floral meristem determinacy	98	23.9	34	0.01415
All	Quantile 2	GO:0055091	phospholipid homeostasis	5	1.22	4	0.01423
All	Quantile 2	GO:0070328	triglyceride homeostasis	5	1.22	4	0.01423
All	Quantile 2	GO:0070918	production of small RNA involved in gene silencing by RNA	584	142.42	137	0.01425
All	Quantile 2	GO:0006323	DNA packaging	535	130.47	156	0.01445
All	Quantile 2	GO:0000056	ribosomal small subunit export from nucleus	3	0.73	3	0.0145
All	Quantile 2	GO:0000237	leptotene	3	0.73	3	0.0145
All	Quantile 2	GO:0000238	zygotene	3	0.73	3	0.0145
All	Quantile 2	GO:0006481	C-terminal protein methylation	3	0.73	3	0.0145
All	Quantile 2	GO:0015768	maltose transport	3	0.73	3	0.0145
All	Quantile 2	GO:0019424	sulfide oxidation, using siroheme sulfite reductase	3	0.73	3	0.0145
All	Quantile 2	GO:0046396	D-galacturonate metabolic process	3	0.73	3	0.0145
All	Quantile 2	GO:2000145	regulation of cell motility	3	0.73	3	0.0145
All	Quantile 2	GO:0033683	nucleotide-excision repair, DNA incision	12	2.93	5	0.0145
All	Quantile 2	GO:1902749	regulation of cell cycle G2/M phase transition	224	54.63	50	0.01452
All	Quantile 2	GO:0009611	response to wounding	5796	1413.43	1472	0.01466
All	Quantile 2	GO:0009052	pentose-phosphate shunt, non-oxidative branch	15	3.66	8	0.01486
All	Quantile 2	GO:0044206	UMP salvage	15	3.66	8	0.01486
All	Quantile 2	GO:0044211	CTP salvage	15	3.66	8	0.01486
All	Quantile 2	GO:0030244	cellulose biosynthetic process	1127	274.83	304	0.01502
All	Quantile 2	GO:0010197	polar nucleus fusion	700	170.7	196	0.01517
All	Quantile 2	GO:0071480	cellular response to gamma radiation	18	4.39	9	0.01644
All	Quantile 2	GO:0006971	hypotonic response	59	14.39	13	0.01648
All	Quantile 2	GO:0046345	abscisic acid catabolic process	428	104.37	124	0.01671
All	Quantile 2	GO:0009643	photosynthetic acclimation	127	30.97	42	0.0169
All	Quantile 2	GO:0019295	coenzyme M biosynthetic process	52	12.68	20	0.01692
All	Quantile 2	GO:0051603	proteolysis involved in cellular protein catabolic process	4035	983.99	1078	0.01712
All	Quantile 2	GO:0009648	photoperiodism	1183	288.49	278	0.01773
All	Quantile 2	GO:0009690	cytokinin metabolic process	514	125.35	142	0.01832
All	Quantile 2	GO:0006955	immune response	12363	3014.87	3356	0.01836
All	Quantile 2	GO:0010016	shoot system morphogenesis	3316	808.65	830	0.01858
All	Quantile 2	GO:0010150	leaf senescence	1302	317.51	351	0.01863
All	Quantile 2	GO:0080024	indolebutyric acid metabolic process	318	77.55	94	0.02
All	Quantile 2	GO:0009559	embryo sac central cell differentiation	713	173.87	203	0.02109
All	Quantile 2	GO:0010024	phytochromobilin biosynthetic process	13	3.17	7	0.02123
All	Quantile 2	GO:0010075	regulation of meristem growth	1908	465.29	509	0.02208
All	Quantile 2	GO:0034440	lipid oxidation	753	183.63	210	0.0222
All	Quantile 2	GO:0046283	anthocyanin-containing compound metabolic process	954	232.64	253	0.02239
All	Quantile 2	GO:0009269	response to desiccation	440	107.3	126	0.02279
All	Quantile 2	GO:0009409	response to cold	10088	2460.09	2508	0.02332
All	Quantile 2	GO:0019048	modulation by virus of host morphology or physiology	47	11.46	18	0.02381
All	Quantile 2	GO:0006284	base-excision repair	108	26.34	35	0.02424
All	Quantile 2	GO:0006176	dATP biosynthetic process from ADP	8	1.95	5	0.02456
All	Quantile 2	GO:0019447	D-cysteine catabolic process	8	1.95	5	0.02456
All	Quantile 2	GO:0006696	ergosterol biosynthetic process	19	4.63	9	0.0246
All	Quantile 2	GO:1902000	homogentisate catabolic process	19	4.63	9	0.0246
All	Quantile 2	GO:0009451	RNA modification	1742	424.81	439	0.02612
All	Quantile 2	GO:0070838	divalent metal ion transport	1314	320.44	303	0.02643
All	Quantile 2	GO:0000041	transition metal ion transport	1329	324.09	307	0.02799
All	Quantile 2	GO:0010236	plastoquinone biosynthetic process	38	9.27	15	0.02824
All	Quantile 2	GO:0009870	defense response signaling pathway, resistance gene-dependent	149	36.34	47	0.02856
All	Quantile 2	GO:0048240	sperm capacitation	11	2.68	6	0.03053
All	Quantile 2	GO:1901183	positive regulation of camalexin biosynthetic process	11	2.68	6	0.03053
All	Quantile 2	GO:2000008	regulation of protein localization to cell surface	11	2.68	6	0.03053
All	Quantile 2	GO:0052542	defense response by callose deposition	2063	503.09	578	0.03079
All	Quantile 2	GO:0071369	cellular response to ethylene stimulus	1246	303.85	311	0.03216
All	Quantile 2	GO:0071294	cellular response to zinc ion	14	3.41	7	0.03367
All	Quantile 2	GO:0009251	glucan catabolic process	234	57.06	67	0.03375
All	Quantile 2	GO:0071554	cell wall organization or biogenesis	6411	1563.4	1554	0.03379
All	Quantile 2	GO:0010424	DNA methylation on cytosine within a CG sequence	26	6.34	11	0.03381
All	Quantile 2	GO:0031347	regulation of defense response	6813	1661.44	1867	0.03416
All	Quantile 2	GO:0045048	protein insertion into ER membrane	9	2.19	5	0.03445
All	Quantile 2	GO:0090706	specification of plant organ position	6	1.46	4	0.03445
All	Quantile 2	GO:1903288	positive regulation of potassium ion import	6	1.46	4	0.03445
All	Quantile 2	GO:0018345	protein palmitoylation	72	17.56	15	0.03448
All	Quantile 2	GO:0035066	positive regulation of histone acetylation	17	4.15	8	0.03502
All	Quantile 2	GO:0009267	cellular response to starvation	2687	655.26	673	0.03562
All	Quantile 2	GO:0051289	protein homotetramerization	39	9.51	15	0.0358
All	Quantile 2	GO:0010117	photoprotection	66	16.09	23	0.03672
All	Quantile 2	GO:0009617	response to bacterium	8448	2060.15	2229	0.03753
All	Quantile 2	GO:0010417	glucuronoxylan biosynthetic process	56	13.66	20	0.03831
All	Quantile 2	GO:0080086	stamen filament development	170	41.46	52	0.03868
All	Quantile 2	GO:0050896	response to stimulus	49188	11995.1	12229	0.03872
All	Quantile 2	GO:0043086	negative regulation of catalytic activity	1205	293.85	309	0.03892
All	Quantile 2	GO:0010274	hydrotropism	33	8.05	13	0.0403
All	Quantile 2	GO:0019509	L-methionine salvage from methylthioadenosine	33	8.05	13	0.0403
All	Quantile 2	GO:0034755	iron ion transmembrane transport	84	20.48	28	0.04054
All	Quantile 2	GO:0006465	signal peptide processing	60	14.63	21	0.04258
All	Quantile 2	GO:0048441	petal development	388	94.62	76	0.04348
All	Quantile 2	GO:0048655	anther wall tapetum morphogenesis	712	173.63	227	0.04385
All	Quantile 2	GO:0032956	regulation of actin cytoskeleton organization	468	114.13	125	0.04422
All	Quantile 2	GO:2000214	regulation of proline metabolic process	12	2.93	7	0.04428
All	Quantile 2	GO:0006488	dolichol-linked oligosaccharide biosynthetic process	12	2.93	6	0.04429
All	Quantile 2	GO:0035280	miRNA loading onto RISC involved in gene silencing by miRNA	9	2.19	5	0.04429
All	Quantile 2	GO:1990019	protein storage vacuole organization	9	2.19	5	0.04429
All	Quantile 2	GO:0006612	protein targeting to membrane	1689	411.88	438	0.04614
All	Quantile 2	GO:0055062	phosphate ion homeostasis	120	29.26	36	0.04625
All	Quantile 2	GO:0048513	animal organ development	1449	353.36	396	0.04627
All	Quantile 2	GO:0009558	embryo sac cellularization	24	5.85	10	0.04689
All	Quantile 2	GO:0009733	response to auxin	3920	955.94	1043	0.04758
All	Quantile 2	GO:1900057	positive regulation of leaf senescence	37	9.02	14	0.04783
All	Quantile 2	GO:0009062	fatty acid catabolic process	812	198.02	227	0.04824
All	Quantile 2	GO:0043619	regulation of transcription from RNA polymerase II promoter in response to oxidative stress	21	5.12	9	0.04866
All	Quantile 2	GO:0051410	detoxification of nitrogen compound	21	5.12	9	0.04866
All	Quantile 2	GO:0030912	response to deep water	12	2.93	6	0.04869
All	Quantile 2	GO:0080187	floral organ senescence	165	40.24	50	0.04883
All	Quantile 2	GO:0045003	double-strand break repair via synthesis-dependent strand annealing	130	31.7	40	0.04898
All	Quantile 2	GO:0007186	G protein-coupled receptor signaling pathway	1128	275.08	302	0.04914
All	Quantile 2	GO:0071483	cellular response to blue light	193	47.07	48	0.04956
All	Quantile 2	GO:0006501	C-terminal protein lipidation	18	4.39	8	0.04987
All	Quantile 2	GO:0007568	aging	1832	446.76	487	0.04998
A	Quantile 2	GO:0009817	defense response to fungus, incompatible interaction	315	77.29	129	8.6e-11
A	Quantile 2	GO:0080086	stamen filament development	53	13.01	33	6.3e-09
A	Quantile 2	GO:0046620	regulation of organ growth	199	48.83	59	4.6e-08
A	Quantile 2	GO:0009734	auxin-activated signaling pathway	517	126.86	172	4.1e-07
A	Quantile 2	GO:0042631	cellular response to water deprivation	519	127.35	177	5.1e-07
A	Quantile 2	GO:0010266	response to vitamin B1	17	4.17	14	8.9e-07
A	Quantile 2	GO:0034976	response to endoplasmic reticulum stress	885	217.16	254	2.4e-06
A	Quantile 2	GO:0010030	positive regulation of seed germination	57	13.99	30	4.7e-06
A	Quantile 2	GO:0080027	response to herbivore	63	15.46	32	6.1e-06
A	Quantile 2	GO:0009693	ethylene biosynthetic process	184	45.15	70	1.1e-05
A	Quantile 2	GO:0080187	floral organ senescence	51	12.51	27	1.2e-05
A	Quantile 2	GO:0010623	programmed cell death involved in cell development	48	11.78	25	1.5e-05
A	Quantile 2	GO:0052696	flavonoid glucuronidation	231	56.68	85	2.1e-05
A	Quantile 2	GO:0010310	regulation of hydrogen peroxide metabolic process	352	86.37	119	5.3e-05
A	Quantile 2	GO:0002764	immune response-regulating signaling pathway	172	42.21	50	5.3e-05
A	Quantile 2	GO:0051555	flavonol biosynthetic process	179	43.92	60	5.4e-05
A	Quantile 2	GO:0005975	carbohydrate metabolic process	2827	693.69	716	0.0001
A	Quantile 2	GO:0071491	cellular response to red light	43	10.55	17	0.00011
A	Quantile 2	GO:0071490	cellular response to far red light	43	10.55	13	0.00011
A	Quantile 2	GO:0002215	defense response to nematode	43	10.55	22	0.00015
A	Quantile 2	GO:0000165	MAPK cascade	441	108.21	132	0.00023
A	Quantile 2	GO:0043900	regulation of multi-organism process	642	157.53	158	0.00027
A	Quantile 2	GO:1901527	abscisic acid-activated signaling pathway involved in stomatal movement	295	72.39	99	0.00029
A	Quantile 2	GO:0016131	brassinosteroid metabolic process	317	77.79	101	0.00031
A	Quantile 2	GO:0098869	cellular oxidant detoxification	93	22.82	42	0.00032
A	Quantile 2	GO:0009697	salicylic acid biosynthetic process	345	84.66	113	0.00033
A	Quantile 2	GO:0071398	cellular response to fatty acid	8	1.96	7	0.00034
A	Quantile 2	GO:1990641	response to iron ion starvation	8	1.96	7	0.00034
A	Quantile 2	GO:1900000	regulation of anthocyanin catabolic process	84	20.61	35	0.00041
A	Quantile 2	GO:0009920	cell plate formation involved in plant-type cell wall biogenesis	100	24.54	40	0.00045
A	Quantile 2	GO:0071492	cellular response to UV-A	17	4.17	11	0.00052
A	Quantile 2	GO:0042178	xenobiotic catabolic process	85	20.86	35	0.00053
A	Quantile 2	GO:0031396	regulation of protein ubiquitination	109	26.75	41	0.0006
A	Quantile 2	GO:0009741	response to brassinosteroid	652	159.99	192	0.00061
A	Quantile 2	GO:0071370	cellular response to gibberellin stimulus	197	48.34	53	0.00068
A	Quantile 2	GO:0019295	coenzyme M biosynthetic process	20	4.91	12	0.00078
A	Quantile 2	GO:0045338	farnesyl diphosphate metabolic process	20	4.91	10	0.00085
A	Quantile 2	GO:0008299	isoprenoid biosynthetic process	702	172.26	162	0.00087
A	Quantile 2	GO:0007606	sensory perception of chemical stimulus	5	1.23	5	0.00089
A	Quantile 2	GO:0010150	leaf senescence	427	104.78	134	0.00092
A	Quantile 2	GO:0009814	defense response, incompatible interaction	2575	631.85	750	0.00098
A	Quantile 2	GO:0009816	defense response to bacterium, incompatible interaction	438	107.48	135	0.00101
A	Quantile 2	GO:0018874	benzoate metabolic process	91	22.33	36	0.00107
A	Quantile 2	GO:0071475	cellular hyperosmotic salinity response	91	22.33	36	0.00107
A	Quantile 2	GO:0070301	cellular response to hydrogen peroxide	104	25.52	40	0.00112
A	Quantile 2	GO:0019375	galactolipid biosynthetic process	154	37.79	55	0.00124
A	Quantile 2	GO:0090057	root radial pattern formation	16	3.93	10	0.0014
A	Quantile 2	GO:0050832	defense response to fungus	2222	545.23	644	0.00172
A	Quantile 2	GO:0009627	systemic acquired resistance	1813	444.87	504	0.00183
A	Quantile 2	GO:0009926	auxin polar transport	257	63.06	77	0.00187
A	Quantile 2	GO:0046482	para-aminobenzoic acid metabolic process	171	41.96	59	0.00216
A	Quantile 2	GO:0007015	actin filament organization	184	45.15	52	0.00244
A	Quantile 2	GO:0010016	shoot system morphogenesis	1085	266.24	278	0.00255
A	Quantile 2	GO:0080024	indolebutyric acid metabolic process	95	23.31	36	0.0026
A	Quantile 2	GO:0009581	detection of external stimulus	146	35.83	37	0.00279
A	Quantile 2	GO:0071230	cellular response to amino acid stimulus	28	6.87	14	0.00313
A	Quantile 2	GO:0071483	cellular response to blue light	68	16.69	18	0.00338
A	Quantile 2	GO:0015706	nitrate transport	644	158.02	185	0.00355
A	Quantile 2	GO:0009718	anthocyanin-containing compound biosynthetic process	249	61.1	80	0.00366
A	Quantile 2	GO:0048658	anther wall tapetum development	265	65.03	83	0.00369
A	Quantile 2	GO:0010117	photoprotection	23	5.64	12	0.00393
A	Quantile 2	GO:0009862	systemic acquired resistance, salicylic acid mediated signaling pathway	740	181.58	213	0.00417
A	Quantile 2	GO:0007585	respiratory gaseous exchange	6	1.47	5	0.00424
A	Quantile 2	GO:0000302	response to reactive oxygen species	1095	268.69	309	0.0043
A	Quantile 2	GO:0009696	salicylic acid metabolic process	471	115.57	157	0.00466
A	Quantile 2	GO:0009867	jasmonic acid mediated signaling pathway	653	160.23	197	0.00483
A	Quantile 2	GO:0051762	sesquiterpene biosynthetic process	13	3.19	8	0.00498
A	Quantile 2	GO:1900057	positive regulation of leaf senescence	13	3.19	8	0.00498
A	Quantile 2	GO:0045088	regulation of innate immune response	1769	434.08	481	0.00522
A	Quantile 2	GO:0016045	detection of bacterium	299	73.37	93	0.00571
A	Quantile 2	GO:0071472	cellular response to salt stress	346	84.9	117	0.00591
A	Quantile 2	GO:0071486	cellular response to high light intensity	24	5.89	12	0.00612
A	Quantile 2	GO:0035235	ionotropic glutamate receptor signaling pathway	30	7.36	14	0.00684
A	Quantile 2	GO:0010363	regulation of plant-type hypersensitive response	1126	276.3	314	0.00691
A	Quantile 2	GO:0005985	sucrose metabolic process	83	20.37	26	0.00702
A	Quantile 2	GO:0009690	cytokinin metabolic process	162	39.75	50	0.0072
A	Quantile 2	GO:0009056	catabolic process	4263	1046.05	1044	0.0078
A	Quantile 2	GO:0009251	glucan catabolic process	80	19.63	27	0.00903
A	Quantile 2	GO:0010375	stomatal complex patterning	24	5.89	8	0.00907
A	Quantile 2	GO:0071260	cellular response to mechanical stimulus	25	6.13	12	0.00917
A	Quantile 2	GO:0071311	cellular response to acetate	25	6.13	12	0.00917
A	Quantile 2	GO:0006284	base-excision repair	37	9.08	16	0.00966
A	Quantile 2	GO:0009615	response to virus	708	173.73	192	0.01052
A	Quantile 2	GO:0009864	induced systemic resistance, jasmonic acid mediated signaling pathway	66	16.2	25	0.01097
A	Quantile 2	GO:0051603	proteolysis involved in cellular protein catabolic process	1257	308.44	308	0.01101
A	Quantile 2	GO:0006612	protein targeting to membrane	594	145.76	166	0.01139
A	Quantile 2	GO:0015979	photosynthesis	585	143.55	127	0.01168
A	Quantile 2	GO:0009727	detection of ethylene stimulus	12	2.94	7	0.01281
A	Quantile 2	GO:0030026	cellular manganese ion homeostasis	23	5.64	11	0.01286
A	Quantile 2	GO:0006883	cellular sodium ion homeostasis	29	7.12	13	0.01345
A	Quantile 2	GO:0010230	alternative respiration	5	1.23	4	0.01456
A	Quantile 2	GO:0033345	asparagine catabolic process via L-aspartate	5	1.23	4	0.01456
A	Quantile 2	GO:0016540	protein autoprocessing	3	0.74	3	0.01477
A	Quantile 2	GO:2001142	nicotinate transport	3	0.74	3	0.01477
A	Quantile 2	GO:2001143	N-methylnicotinate transport	3	0.74	3	0.01477
A	Quantile 2	GO:0006073	cellular glucan metabolic process	874	214.46	206	0.01484
A	Quantile 2	GO:0006955	immune response	4067	997.96	1161	0.01492
A	Quantile 2	GO:2000029	regulation of proanthocyanidin biosynthetic process	15	3.68	8	0.01542
A	Quantile 2	GO:1990069	stomatal opening	61	14.97	13	0.01551
A	Quantile 2	GO:0071446	cellular response to salicylic acid stimulus	1099	269.67	314	0.01594
A	Quantile 2	GO:0019761	glucosinolate biosynthetic process	502	123.18	133	0.01644
A	Quantile 2	GO:0002679	respiratory burst involved in defense response	396	97.17	116	0.01684
A	Quantile 2	GO:0009115	xanthine catabolic process	10	2.45	6	0.01797
A	Quantile 2	GO:0071226	cellular response to molecule of fungal origin	10	2.45	6	0.01797
A	Quantile 2	GO:2000122	negative regulation of stomatal complex development	10	2.45	6	0.01797
A	Quantile 2	GO:0030007	cellular potassium ion homeostasis	52	12.76	20	0.01802
A	Quantile 2	GO:1902475	L-alpha-amino acid transmembrane transport	39	9.57	15	0.01808
A	Quantile 2	GO:0055085	transmembrane transport	1988	487.82	472	0.01811
A	Quantile 2	GO:0060918	auxin transport	284	69.69	91	0.01824
A	Quantile 2	GO:0048438	floral whorl development	1162	285.13	297	0.01835
A	Quantile 2	GO:0009698	phenylpropanoid metabolic process	985	241.7	250	0.01861
A	Quantile 2	GO:0006171	cAMP biosynthetic process	27	6.63	12	0.01867
A	Quantile 2	GO:0052542	defense response by callose deposition	658	161.46	191	0.019
A	Quantile 2	GO:0009311	oligosaccharide metabolic process	356	87.36	88	0.0192
A	Quantile 2	GO:0006952	defense response	6538	1604.29	1758	0.0193
A	Quantile 2	GO:0031930	mitochondria-nucleus signaling pathway	13	3.19	7	0.02194
A	Quantile 2	GO:0016106	sesquiterpenoid biosynthetic process	116	28.46	33	0.02429
A	Quantile 2	GO:0080155	regulation of double fertilization forming a zygote and endosperm	16	3.93	8	0.0243
A	Quantile 2	GO:0019919	peptidyl-arginine methylation, to asymmetrical-dimethyl arginine	8	1.96	5	0.02521
A	Quantile 2	GO:0016036	cellular response to phosphate starvation	319	78.28	96	0.02549
A	Quantile 2	GO:0006605	protein targeting	1091	267.71	256	0.02602
A	Quantile 2	GO:0009738	abscisic acid-activated signaling pathway	1212	297.4	338	0.02621
A	Quantile 2	GO:0001944	vasculature development	250	61.34	75	0.02794
A	Quantile 2	GO:0009723	response to ethylene	849	208.33	236	0.02819
A	Quantile 2	GO:0010167	response to nitrate	449	110.18	127	0.02822
A	Quantile 2	GO:0042254	ribosome biogenesis	548	134.47	126	0.02825
A	Quantile 2	GO:0009269	response to desiccation	141	34.6	45	0.02848
A	Quantile 2	GO:0009664	plant-type cell wall organization	818	200.72	186	0.02858
A	Quantile 2	GO:0070588	calcium ion transmembrane transport	61	14.97	22	0.02937
A	Quantile 2	GO:0071555	cell wall organization	1567	384.51	399	0.02978
A	Quantile 2	GO:0006869	lipid transport	241	59.14	67	0.03016
A	Quantile 2	GO:0071395	cellular response to jasmonic acid stimulus	664	162.93	203	0.03061
A	Quantile 2	GO:0010200	response to chitin	841	206.36	230	0.03094
A	Quantile 2	GO:0080156	mitochondrial mRNA modification	48	11.78	18	0.03131
A	Quantile 2	GO:0006308	DNA catabolic process	26	6.38	10	0.03142
A	Quantile 2	GO:0046473	phosphatidic acid metabolic process	11	2.7	6	0.03142
A	Quantile 2	GO:0000041	transition metal ion transport	451	110.67	120	0.03154
A	Quantile 2	GO:0071732	cellular response to nitric oxide	72	17.67	25	0.03388
A	Quantile 2	GO:0009626	plant-type hypersensitive response	1873	459.6	518	0.0343
A	Quantile 2	GO:1990169	stress response to copper ion	16	3.93	8	0.03472
A	Quantile 2	GO:0070483	detection of hypoxia	14	3.44	7	0.03474
A	Quantile 2	GO:0030162	regulation of proteolysis	175	42.94	57	0.03499
A	Quantile 2	GO:0006850	mitochondrial pyruvate transmembrane transport	6	1.47	4	0.0352
A	Quantile 2	GO:0043067	regulation of programmed cell death	1255	307.95	350	0.03528
A	Quantile 2	GO:0019430	removal of superoxide radicals	22	5.4	11	0.03617
A	Quantile 2	GO:0010212	response to ionizing radiation	224	54.97	56	0.03747
A	Quantile 2	GO:0030187	melatonin biosynthetic process	39	9.57	15	0.0376
A	Quantile 2	GO:0006468	protein phosphorylation	2543	624	659	0.03964
A	Quantile 2	GO:0009966	regulation of signal transduction	960	235.56	239	0.04052
A	Quantile 2	GO:0009062	fatty acid catabolic process	272	66.74	78	0.04081
A	Quantile 2	GO:0009934	regulation of meristem structural organization	229	56.19	68	0.04268
A	Quantile 2	GO:0009845	seed germination	637	156.31	184	0.04314
A	Quantile 2	GO:0050688	regulation of defense response to virus	27	6.63	10	0.04538
A	Quantile 2	GO:0045739	positive regulation of DNA repair	9	2.21	5	0.04539
A	Quantile 2	GO:0034605	cellular response to heat	279	68.46	81	0.04628
A	Quantile 2	GO:0012501	programmed cell death	2217	544.01	618	0.04728
A	Quantile 2	GO:0009813	flavonoid biosynthetic process	850	208.57	235	0.04729
A	Quantile 2	GO:0010024	phytochromobilin biosynthetic process	4	0.98	3	0.04821
A	Quantile 2	GO:0010220	positive regulation of vernalization response	4	0.98	3	0.04821
A	Quantile 2	GO:0010654	apical cell fate commitment	4	0.98	3	0.04821
A	Quantile 2	GO:0015884	folic acid transport	4	0.98	3	0.04821
A	Quantile 2	GO:0010608	posttranscriptional regulation of gene expression	515	126.37	123	0.04832
A	Quantile 2	GO:0010440	stomatal lineage progression	67	16.44	21	0.0486
A	Quantile 2	GO:0009644	response to high light intensity	525	128.82	151	0.04933
A	Quantile 2	GO:0010260	animal organ senescence	64	15.7	22	0.04959
A	Quantile 2	GO:0051301	cell division	1029	252.5	273	0.05
B	Quantile 2	GO:0048511	rhythmic process	365	88.93	107	3.8e-07
B	Quantile 2	GO:1901430	positive regulation of syringal lignin biosynthetic process	34	8.28	21	3.9e-06
B	Quantile 2	GO:0006857	oligopeptide transport	228	55.55	77	4.9e-06
B	Quantile 2	GO:0071230	cellular response to amino acid stimulus	30	7.31	19	6.7e-06
B	Quantile 2	GO:0031146	SCF-dependent proteasomal ubiquitin-dependent protein catabolic process	273	66.52	99	6.9e-06
B	Quantile 2	GO:0048235	pollen sperm cell differentiation	245	59.69	90	9.8e-06
B	Quantile 2	GO:0080086	stamen filament development	60	14.62	30	1.5e-05
B	Quantile 2	GO:0009901	anther dehiscence	283	68.95	100	2.2e-05
B	Quantile 2	GO:0006874	cellular calcium ion homeostasis	51	12.43	26	2.7e-05
B	Quantile 2	GO:0071472	cellular response to salt stress	387	94.29	125	3.4e-05
B	Quantile 2	GO:0006883	cellular sodium ion homeostasis	29	7.07	18	6.1e-05
B	Quantile 2	GO:0071260	cellular response to mechanical stimulus	26	6.33	16	6.1e-05
B	Quantile 2	GO:0071311	cellular response to acetate	26	6.33	16	6.1e-05
B	Quantile 2	GO:0010197	polar nucleus fusion	259	63.11	91	6.2e-05
B	Quantile 2	GO:0009734	auxin-activated signaling pathway	529	128.89	167	7e-05
B	Quantile 2	GO:0035235	ionotropic glutamate receptor signaling pathway	34	8.28	19	8.1e-05
B	Quantile 2	GO:0009769	photosynthesis, light harvesting in photosystem II	35	8.53	19	0.00014
B	Quantile 2	GO:0045851	pH reduction	223	54.33	78	0.00023
B	Quantile 2	GO:1901657	glycosyl compound metabolic process	741	180.54	170	0.00032
B	Quantile 2	GO:0006351	transcription, DNA-templated	4411	1074.74	1050	0.00033
B	Quantile 2	GO:0071398	cellular response to fatty acid	10	2.44	8	0.00034
B	Quantile 2	GO:0006334	nucleosome assembly	143	34.84	53	0.0005
B	Quantile 2	GO:0006979	response to oxidative stress	2139	521.17	548	0.0006
B	Quantile 2	GO:0010183	pollen tube guidance	68	16.57	29	0.0007
B	Quantile 2	GO:0009664	plant-type cell wall organization	807	196.62	206	0.00073
B	Quantile 2	GO:0006624	vacuolar protein processing	13	3.17	9	0.00081
B	Quantile 2	GO:0071456	cellular response to hypoxia	153	37.28	55	0.00099
B	Quantile 2	GO:1990641	response to iron ion starvation	9	2.19	7	0.00114
B	Quantile 2	GO:0051410	detoxification of nitrogen compound	7	1.71	6	0.00116
B	Quantile 2	GO:0006649	phospholipid transfer to membrane	16	3.9	10	0.00132
B	Quantile 2	GO:0009845	seed germination	653	159.1	197	0.00133
B	Quantile 2	GO:0051607	defense response to virus	582	141.8	166	0.00135
B	Quantile 2	GO:0045490	pectin catabolic process	59	14.38	25	0.00177
B	Quantile 2	GO:0009768	photosynthesis, light harvesting in photosystem I	30	7.31	15	0.00208
B	Quantile 2	GO:0070588	calcium ion transmembrane transport	63	15.35	26	0.00227
B	Quantile 2	GO:0010411	xyloglucan metabolic process	96	23.39	31	0.00235
B	Quantile 2	GO:0006730	one-carbon metabolic process	47	11.45	21	0.00244
B	Quantile 2	GO:0010266	response to vitamin B1	17	4.14	10	0.00252
B	Quantile 2	GO:0042545	cell wall modification	1005	244.87	256	0.00282
B	Quantile 2	GO:0000165	MAPK cascade	442	107.69	128	0.0033
B	Quantile 2	GO:0010227	floral organ abscission	243	59.21	79	0.00331
B	Quantile 2	GO:0006880	intracellular sequestering of iron ion	15	3.65	9	0.00346
B	Quantile 2	GO:0042631	cellular response to water deprivation	558	135.96	164	0.00352
B	Quantile 2	GO:1904526	regulation of microtubule binding	4	0.97	4	0.00352
B	Quantile 2	GO:0043619	regulation of transcription from RNA polymerase II promoter in response to oxidative stress	8	1.95	6	0.00367
B	Quantile 2	GO:0042744	hydrogen peroxide catabolic process	231	56.28	74	0.0049
B	Quantile 2	GO:0009942	longitudinal axis specification	217	52.87	70	0.00506
B	Quantile 2	GO:0018298	protein-chromophore linkage	51	12.43	21	0.00595
B	Quantile 2	GO:0042493	response to drug	3377	822.8	837	0.00605
B	Quantile 2	GO:0035725	sodium ion transmembrane transport	46	11.21	19	0.00645
B	Quantile 2	GO:0048645	animal organ formation	264	64.32	79	0.00658
B	Quantile 2	GO:0051260	protein homooligomerization	312	76.02	97	0.0071
B	Quantile 2	GO:0071732	cellular response to nitric oxide	71	17.3	27	0.00719
B	Quantile 2	GO:0006952	defense response	6700	1632.45	1701	0.00729
B	Quantile 2	GO:0009401	phosphoenolpyruvate-dependent sugar phosphotransferase system	19	4.63	10	0.00733
B	Quantile 2	GO:0090057	root radial pattern formation	19	4.63	10	0.00733
B	Quantile 2	GO:0009409	response to cold	3364	819.64	880	0.00762
B	Quantile 2	GO:0006559	L-phenylalanine catabolic process	43	10.48	18	0.00861
B	Quantile 2	GO:0031396	regulation of protein ubiquitination	113	27.53	37	0.00868
B	Quantile 2	GO:2000068	regulation of defense response to insect	27	6.58	14	0.00871
B	Quantile 2	GO:0009294	DNA mediated transformation	66	16.08	25	0.01001
B	Quantile 2	GO:0010068	protoderm histogenesis	205	49.95	65	0.01014
B	Quantile 2	GO:0044030	regulation of DNA methylation	17	4.14	9	0.01038
B	Quantile 2	GO:0007169	transmembrane receptor protein tyrosine kinase signaling pathway	521	126.94	150	0.01102
B	Quantile 2	GO:0010067	procambium histogenesis	213	51.9	67	0.01108
B	Quantile 2	GO:0060548	negative regulation of cell death	465	113.3	132	0.01121
B	Quantile 2	GO:0009835	fruit ripening	44	10.72	18	0.01131
B	Quantile 2	GO:0009556	microsporogenesis	257	62.62	79	0.01156
B	Quantile 2	GO:0009729	detection of brassinosteroid stimulus	210	51.17	66	0.01186
B	Quantile 2	GO:0019827	stem cell population maintenance	129	31.43	46	0.01206
B	Quantile 2	GO:0007172	signal complex assembly	203	49.46	64	0.01215
B	Quantile 2	GO:0010234	anther wall tapetum cell fate specification	203	49.46	64	0.01215
B	Quantile 2	GO:0090548	response to nitrate starvation	203	49.46	64	0.01215
B	Quantile 2	GO:1901528	hydrogen peroxide mediated signaling pathway involved in stomatal movement	203	49.46	64	0.01215
B	Quantile 2	GO:1902025	nitrate import	203	49.46	64	0.01215
B	Quantile 2	GO:2000604	negative regulation of secondary growth	203	49.46	64	0.01215
B	Quantile 2	GO:0048509	regulation of meristem development	753	183.47	201	0.01217
B	Quantile 2	GO:0015700	arsenite transport	12	2.92	7	0.01231
B	Quantile 2	GO:0009945	radial axis specification	204	49.7	64	0.01358
B	Quantile 2	GO:0000226	microtubule cytoskeleton organization	557	135.71	151	0.01365
B	Quantile 2	GO:0006898	receptor-mediated endocytosis	224	54.58	67	0.01366
B	Quantile 2	GO:0010030	positive regulation of seed germination	61	14.86	23	0.01398
B	Quantile 2	GO:0000769	syncytium formation by mitosis without cytokinesis	5	1.22	4	0.01418
B	Quantile 2	GO:0006617	SRP-dependent cotranslational protein targeting to membrane, signal sequence recognition	5	1.22	4	0.01418
B	Quantile 2	GO:0019284	L-methionine salvage from S-adenosylmethionine	5	1.22	4	0.01418
B	Quantile 2	GO:0046938	phytochelatin biosynthetic process	5	1.22	4	0.01418
B	Quantile 2	GO:0051307	meiotic chromosome separation	16	3.9	6	0.01418
B	Quantile 2	GO:0006772	thiamine metabolic process	22	5.36	7	0.01419
B	Quantile 2	GO:0048655	anther wall tapetum morphogenesis	229	55.8	72	0.01437
B	Quantile 2	GO:0019499	cyanide metabolic process	13	3.17	8	0.01444
B	Quantile 2	GO:0009826	unidimensional cell growth	1266	308.46	300	0.01445
B	Quantile 2	GO:0071266	'de novo' L-methionine biosynthetic process	10	2.44	6	0.01445
B	Quantile 2	GO:0002540	leukotriene production involved in inflammatory response	3	0.73	3	0.01446
B	Quantile 2	GO:0010184	cytokinin transport	3	0.73	3	0.01446
B	Quantile 2	GO:0018343	protein farnesylation	3	0.73	3	0.01446
B	Quantile 2	GO:0019447	D-cysteine catabolic process	3	0.73	3	0.01446
B	Quantile 2	GO:0019458	methionine catabolic process via 2-oxobutanoate	3	0.73	3	0.01446
B	Quantile 2	GO:0009808	lignin metabolic process	629	153.26	192	0.01468
B	Quantile 2	GO:0000060	protein import into nucleus, translocation	15	3.65	8	0.01477
B	Quantile 2	GO:0001558	regulation of cell growth	493	120.12	132	0.01484
B	Quantile 2	GO:0010480	microsporocyte differentiation	205	49.95	64	0.01514
B	Quantile 2	GO:1901529	positive regulation of anion channel activity	205	49.95	64	0.01514
B	Quantile 2	GO:2000027	regulation of animal organ morphogenesis	240	58.48	72	0.01516
B	Quantile 2	GO:0042351	'de novo' GDP-L-fucose biosynthetic process	42	10.23	17	0.01531
B	Quantile 2	GO:1900140	regulation of seedling development	364	88.69	111	0.01641
B	Quantile 2	GO:0001944	vasculature development	257	62.62	78	0.01649
B	Quantile 2	GO:0030155	regulation of cell adhesion	206	50.19	64	0.01684
B	Quantile 2	GO:0009934	regulation of meristem structural organization	239	58.23	73	0.01708
B	Quantile 2	GO:0010102	lateral root morphogenesis	463	112.81	126	0.01712
B	Quantile 2	GO:0071490	cellular response to far red light	37	9.02	16	0.01731
B	Quantile 2	GO:0019509	L-methionine salvage from methylthioadenosine	10	2.44	6	0.01735
B	Quantile 2	GO:0071491	cellular response to red light	39	9.5	12	0.01736
B	Quantile 2	GO:0048467	gynoecium development	582	141.8	160	0.01737
B	Quantile 2	GO:1990169	stress response to copper ion	27	6.58	12	0.01767
B	Quantile 2	GO:0046620	regulation of organ growth	202	49.22	56	0.01769
B	Quantile 2	GO:0050832	defense response to fungus	2339	569.9	603	0.01823
B	Quantile 2	GO:0048281	inflorescence morphogenesis	219	53.36	68	0.01876
B	Quantile 2	GO:0030007	cellular potassium ion homeostasis	56	13.64	21	0.01955
B	Quantile 2	GO:0030187	melatonin biosynthetic process	56	13.64	21	0.01955
B	Quantile 2	GO:0009944	polarity specification of adaxial/abaxial axis	319	77.72	94	0.02082
B	Quantile 2	GO:0009727	detection of ethylene stimulus	16	3.9	8	0.02332
B	Quantile 2	GO:0019762	glucosinolate catabolic process	45	10.96	14	0.02334
B	Quantile 2	GO:0006955	immune response	4192	1021.38	1060	0.02354
B	Quantile 2	GO:0010089	xylem development	543	132.3	152	0.02355
B	Quantile 2	GO:0009913	epidermal cell differentiation	67	16.32	19	0.02357
B	Quantile 2	GO:0071365	cellular response to auxin stimulus	572	139.37	180	0.02375
B	Quantile 2	GO:0006102	isocitrate metabolic process	19	4.63	9	0.02443
B	Quantile 2	GO:0010047	fruit dehiscence	19	4.63	9	0.02443
B	Quantile 2	GO:0015976	carbon utilization	8	1.95	5	0.02446
B	Quantile 2	GO:0043562	cellular response to nitrogen levels	231	56.28	61	0.0248
B	Quantile 2	GO:0030026	cellular manganese ion homeostasis	22	5.36	10	0.02481
B	Quantile 2	GO:0009311	oligosaccharide metabolic process	329	80.16	70	0.02554
B	Quantile 2	GO:0009723	response to ethylene	846	206.13	223	0.02619
B	Quantile 2	GO:0009887	animal organ morphogenesis	375	91.37	115	0.02662
B	Quantile 2	GO:0010148	transpiration	222	54.09	67	0.02772
B	Quantile 2	GO:0009861	jasmonic acid and ethylene-dependent systemic resistance	94	22.9	24	0.02813
B	Quantile 2	GO:0010073	meristem maintenance	815	198.57	228	0.02851
B	Quantile 2	GO:0009958	positive gravitropism	103	25.1	34	0.02951
B	Quantile 2	GO:0042594	response to starvation	1108	269.96	279	0.03027
B	Quantile 2	GO:0007165	signal transduction	4978	1212.89	1252	0.03061
B	Quantile 2	GO:0009626	plant-type hypersensitive response	1947	474.38	495	0.03177
B	Quantile 2	GO:0071492	cellular response to UV-A	14	3.41	7	0.03349
B	Quantile 2	GO:1901695	tyramine biosynthetic process	14	3.41	7	0.03349
B	Quantile 2	GO:0042391	regulation of membrane potential	29	7.07	12	0.03356
B	Quantile 2	GO:0046148	pigment biosynthetic process	632	153.99	158	0.0343
B	Quantile 2	GO:1902609	(R)-2-hydroxy-alpha-linolenic acid biosynthetic process	6	1.46	4	0.03433
B	Quantile 2	GO:2000117	negative regulation of cysteine-type endopeptidase activity	6	1.46	4	0.03433
B	Quantile 2	GO:0030244	cellulose biosynthetic process	363	88.44	104	0.03445
B	Quantile 2	GO:0006896	Golgi to vacuole transport	23	5.6	10	0.03452
B	Quantile 2	GO:0010037	response to carbon dioxide	23	5.6	10	0.03452
B	Quantile 2	GO:0030397	membrane disassembly	17	4.14	8	0.03482
B	Quantile 2	GO:0034976	response to endoplasmic reticulum stress	891	217.09	234	0.03537
B	Quantile 2	GO:0098869	cellular oxidant detoxification	84	20.47	25	0.0364
B	Quantile 2	GO:0045088	regulation of innate immune response	1795	437.35	451	0.03731
B	Quantile 2	GO:0006171	cAMP biosynthetic process	36	8.77	14	0.0377
B	Quantile 2	GO:0070828	heterochromatin organization	63	15.35	20	0.03773
B	Quantile 2	GO:0009650	UV protection	218	53.12	65	0.03782
B	Quantile 2	GO:0080156	mitochondrial mRNA modification	53	12.91	19	0.04076
B	Quantile 2	GO:0006814	sodium ion transport	89	21.68	35	0.04101
B	Quantile 2	GO:0016049	cell growth	1697	413.47	423	0.04143
B	Quantile 2	GO:0048441	petal development	135	32.89	27	0.04198
B	Quantile 2	GO:0009072	aromatic amino acid family metabolic process	669	163	173	0.04203
B	Quantile 2	GO:0071805	potassium ion transmembrane transport	164	39.96	46	0.04322
B	Quantile 2	GO:0006610	ribosomal protein import into nucleus	9	2.19	5	0.04412
B	Quantile 2	GO:0071722	detoxification of arsenic-containing substance	9	2.19	5	0.04412
B	Quantile 2	GO:0070370	cellular heat acclimation	231	56.28	68	0.04424
B	Quantile 2	GO:0046713	borate transport	134	32.65	41	0.0459
B	Quantile 2	GO:0070838	divalent metal ion transport	435	105.99	117	0.04601
B	Quantile 2	GO:0009864	induced systemic resistance, jasmonic acid mediated signaling pathway	64	15.59	22	0.04624
B	Quantile 2	GO:0010374	stomatal complex development	437	106.47	116	0.04713
B	Quantile 2	GO:0045003	double-strand break repair via synthesis-dependent strand annealing	58	14.13	20	0.04717
B	Quantile 2	GO:0030834	regulation of actin filament depolymerization	27	6.58	9	0.04726
B	Quantile 2	GO:0051574	positive regulation of histone H3-K9 methylation	19	4.63	7	0.04727
B	Quantile 2	GO:0009052	pentose-phosphate shunt, non-oxidative branch	4	0.97	3	0.04727
B	Quantile 2	GO:0010258	NADH dehydrogenase complex (plastoquinone) assembly	4	0.97	3	0.04727
B	Quantile 2	GO:0019343	cysteine biosynthetic process via cystathionine	4	0.97	3	0.04727
B	Quantile 2	GO:0019346	transsulfuration	4	0.97	3	0.04727
B	Quantile 2	GO:0019370	leukotriene biosynthetic process	4	0.97	3	0.04727
B	Quantile 2	GO:0019500	cyanide catabolic process	4	0.97	3	0.04727
B	Quantile 2	GO:0032197	transposition, RNA-mediated	4	0.97	3	0.04727
B	Quantile 2	GO:0032264	IMP salvage	4	0.97	3	0.04727
B	Quantile 2	GO:0042407	cristae formation	4	0.97	3	0.04727
B	Quantile 2	GO:0045041	protein import into mitochondrial intermembrane space	4	0.97	3	0.04727
B	Quantile 2	GO:0048700	acquisition of desiccation tolerance in seed	4	0.97	3	0.04727
B	Quantile 2	GO:0080145	cysteine homeostasis	4	0.97	3	0.04727
B	Quantile 2	GO:0090241	negative regulation of histone H4 acetylation	4	0.97	3	0.04727
B	Quantile 2	GO:1902395	regulation of 1-deoxy-D-xylulose-5-phosphate synthase activity	4	0.97	3	0.04727
B	Quantile 2	GO:1902626	assembly of large subunit precursor of preribosome	4	0.97	3	0.04727
B	Quantile 2	GO:0034613	cellular protein localization	1480	360.6	368	0.04822
B	Quantile 2	GO:0071421	manganese ion transmembrane transport	21	5.12	9	0.04837
B	Quantile 2	GO:0016567	protein ubiquitination	1472	358.65	398	0.04909
B	Quantile 2	GO:1900366	negative regulation of defense response to insect	18	4.39	8	0.0496
B	Quantile 2	GO:0006298	mismatch repair	27	6.58	10	0.04987
B	Quantile 2	GO:0009856	pollination	1170	285.07	281	0.04991
D	Quantile 2	GO:0071289	cellular response to nickel ion	27	6.56	24	2.3e-12
D	Quantile 2	GO:0009643	photosynthetic acclimation	45	10.93	33	5.8e-12
D	Quantile 2	GO:0045926	negative regulation of growth	335	81.39	107	1.3e-09
D	Quantile 2	GO:2000280	regulation of root development	304	73.86	99	2.2e-07
D	Quantile 2	GO:0016139	glycoside catabolic process	115	27.94	40	2.3e-06
D	Quantile 2	GO:0046916	cellular transition metal ion homeostasis	467	113.46	135	1e-05
D	Quantile 2	GO:0044249	cellular biosynthetic process	10365	2518.19	2524	2.3e-05
D	Quantile 2	GO:0009755	hormone-mediated signaling pathway	2813	683.42	720	2.3e-05
D	Quantile 2	GO:0033473	indoleacetic acid conjugate metabolic process	16	3.89	12	2.8e-05
D	Quantile 2	GO:0030001	metal ion transport	1145	278.18	269	4.6e-05
D	Quantile 2	GO:0098869	cellular oxidant detoxification	88	21.38	37	7.3e-05
D	Quantile 2	GO:0071446	cellular response to salicylic acid stimulus	1094	265.79	311	0.00013
D	Quantile 2	GO:0010363	regulation of plant-type hypersensitive response	1067	259.23	309	0.00015
D	Quantile 2	GO:0031146	SCF-dependent proteasomal ubiquitin-dependent protein catabolic process	247	60.01	85	0.00021
D	Quantile 2	GO:0010310	regulation of hydrogen peroxide metabolic process	349	84.79	113	0.0003
D	Quantile 2	GO:1901657	glycosyl compound metabolic process	783	190.23	203	0.00033
D	Quantile 2	GO:0009631	cold acclimation	171	41.54	61	0.00055
D	Quantile 2	GO:1990069	stomatal opening	69	16.76	21	0.00071
D	Quantile 2	GO:0048544	recognition of pollen	183	44.46	65	0.00077
D	Quantile 2	GO:0042127	regulation of cell proliferation	425	103.25	128	0.00094
D	Quantile 2	GO:0009664	plant-type cell wall organization	846	205.54	229	0.00096
D	Quantile 2	GO:0071226	cellular response to molecule of fungal origin	7	1.7	6	0.00114
D	Quantile 2	GO:0042549	photosystem II stabilization	16	3.89	10	0.00129
D	Quantile 2	GO:0044550	secondary metabolite biosynthetic process	1154	280.37	299	0.00141
D	Quantile 2	GO:0016567	protein ubiquitination	1547	375.85	420	0.00144
D	Quantile 2	GO:0002679	respiratory burst involved in defense response	380	92.32	118	0.00153
D	Quantile 2	GO:0006612	protein targeting to membrane	560	136.05	164	0.00217
D	Quantile 2	GO:0080141	regulation of jasmonic acid biosynthetic process	22	5.34	12	0.0022
D	Quantile 2	GO:0050896	response to stimulus	16152	3924.15	3992	0.00255
D	Quantile 2	GO:0045851	pH reduction	259	62.92	83	0.00281
D	Quantile 2	GO:0050732	negative regulation of peptidyl-tyrosine phosphorylation	4	0.97	4	0.00348
D	Quantile 2	GO:0048640	negative regulation of developmental growth	16	3.89	6	0.00348
D	Quantile 2	GO:0071395	cellular response to jasmonic acid stimulus	633	153.79	181	0.00354
D	Quantile 2	GO:2000117	negative regulation of cysteine-type endopeptidase activity	8	1.94	6	0.00361
D	Quantile 2	GO:0012501	programmed cell death	2193	532.79	580	0.00391
D	Quantile 2	GO:0010220	positive regulation of vernalization response	6	1.46	5	0.00405
D	Quantile 2	GO:0006979	response to oxidative stress	2156	523.8	541	0.00422
D	Quantile 2	GO:0009611	response to wounding	1964	477.16	518	0.00432
D	Quantile 2	GO:0048235	pollen sperm cell differentiation	231	56.12	74	0.00454
D	Quantile 2	GO:0009901	anther dehiscence	261	63.41	82	0.00521
D	Quantile 2	GO:0009642	response to light intensity	803	195.09	192	0.00607
D	Quantile 2	GO:0031571	mitotic G1 DNA damage checkpoint	16	3.89	9	0.00609
D	Quantile 2	GO:0080144	amino acid homeostasis	38	9.23	17	0.00634
D	Quantile 2	GO:2000022	regulation of jasmonic acid mediated signaling pathway	33	8.02	15	0.00635
D	Quantile 2	GO:0030007	cellular potassium ion homeostasis	58	14.09	23	0.00682
D	Quantile 2	GO:1902475	L-alpha-amino acid transmembrane transport	38	9.23	16	0.00793
D	Quantile 2	GO:0070828	heterochromatin organization	56	13.61	20	0.00873
D	Quantile 2	GO:0010252	auxin homeostasis	37	8.99	16	0.00875
D	Quantile 2	GO:0009864	induced systemic resistance, jasmonic acid mediated signaling pathway	69	16.76	26	0.00908
D	Quantile 2	GO:0009617	response to bacterium	2895	703.34	743	0.00988
D	Quantile 2	GO:0000165	MAPK cascade	440	106.9	120	0.01004
D	Quantile 2	GO:0042744	hydrogen peroxide catabolic process	228	55.39	71	0.01096
D	Quantile 2	GO:0009693	ethylene biosynthetic process	191	46.4	60	0.01225
D	Quantile 2	GO:0009862	systemic acquired resistance, salicylic acid mediated signaling pathway	723	175.65	202	0.01242
D	Quantile 2	GO:0019593	mannitol biosynthetic process	5	1.21	4	0.01403
D	Quantile 2	GO:0043328	protein transport to vacuole involved in ubiquitin-dependent protein catabolic process via the multivesicular body sorting pathway	5	1.21	4	0.01403
D	Quantile 2	GO:0090451	cotyledon boundary formation	5	1.21	4	0.01403
D	Quantile 2	GO:0009268	response to pH	20	4.86	7	0.01403
D	Quantile 2	GO:0006212	uracil catabolic process	3	0.73	3	0.01434
D	Quantile 2	GO:0006580	ethanolamine metabolic process	3	0.73	3	0.01434
D	Quantile 2	GO:0019483	beta-alanine biosynthetic process	3	0.73	3	0.01434
D	Quantile 2	GO:1990019	protein storage vacuole organization	3	0.73	3	0.01434
D	Quantile 2	GO:0009960	endosperm development	377	91.59	109	0.01447
D	Quantile 2	GO:1901527	abscisic acid-activated signaling pathway involved in stomatal movement	350	85.03	103	0.01557
D	Quantile 2	GO:0046777	protein autophosphorylation	1101	267.49	298	0.01647
D	Quantile 2	GO:0006555	methionine metabolic process	175	42.52	38	0.01705
D	Quantile 2	GO:0048766	root hair initiation	27	6.56	12	0.01727
D	Quantile 2	GO:0010200	response to chitin	844	205.05	232	0.0178
D	Quantile 2	GO:0080092	regulation of pollen tube growth	157	38.14	50	0.01912
D	Quantile 2	GO:0050832	defense response to fungus	2356	572.39	604	0.01932
D	Quantile 2	GO:0009620	response to fungus	2923	710.15	773	0.01977
D	Quantile 2	GO:0009826	unidimensional cell growth	1338	325.07	365	0.02028
D	Quantile 2	GO:0042177	negative regulation of protein catabolic process	63	15.31	23	0.02031
D	Quantile 2	GO:1901430	positive regulation of syringal lignin biosynthetic process	37	8.99	15	0.02116
D	Quantile 2	GO:0051016	barbed-end actin filament capping	16	3.89	8	0.02293
D	Quantile 2	GO:0010026	trichome differentiation	245	59.52	63	0.02302
D	Quantile 2	GO:0051302	regulation of cell division	334	81.15	94	0.02337
D	Quantile 2	GO:0010112	regulation of systemic acquired resistance	226	54.91	68	0.0238
D	Quantile 2	GO:0010228	vegetative to reproductive phase transition of meristem	729	177.11	174	0.02391
D	Quantile 2	GO:0010417	glucuronoxylan biosynthetic process	19	4.62	9	0.02399
D	Quantile 2	GO:0048511	rhythmic process	368	89.41	90	0.02598
D	Quantile 2	GO:0009269	response to desiccation	153	37.17	48	0.02783
D	Quantile 2	GO:0031347	regulation of defense response	2290	556.36	628	0.02948
D	Quantile 2	GO:0071732	cellular response to nitric oxide	65	15.79	23	0.02953
D	Quantile 2	GO:0071585	detoxification of cadmium ion	11	2.67	6	0.02998
D	Quantile 2	GO:0071370	cellular response to gibberellin stimulus	190	46.16	47	0.03003
D	Quantile 2	GO:0010074	maintenance of meristem identity	90	21.87	33	0.03007
D	Quantile 2	GO:0055085	transmembrane transport	2007	487.6	465	0.03076
D	Quantile 2	GO:0071281	cellular response to iron ion	86	20.89	29	0.03085
D	Quantile 2	GO:0005986	sucrose biosynthetic process	29	7.05	12	0.03167
D	Quantile 2	GO:0006873	cellular ion homeostasis	727	176.63	203	0.03241
D	Quantile 2	GO:0030968	endoplasmic reticulum unfolded protein response	399	96.94	114	0.03247
D	Quantile 2	GO:0010492	maintenance of shoot apical meristem identity	26	6.32	11	0.03291
D	Quantile 2	GO:0006817	phosphate ion transport	47	11.42	14	0.03302
D	Quantile 2	GO:0009828	plant-type cell wall loosening	76	18.46	26	0.0331
D	Quantile 2	GO:0034613	cellular protein localization	1502	364.91	379	0.03354
D	Quantile 2	GO:0007169	transmembrane receptor protein tyrosine kinase signaling pathway	548	133.14	152	0.0337
D	Quantile 2	GO:0009739	response to gibberellin	400	97.18	110	0.03392
D	Quantile 2	GO:0007052	mitotic spindle organization	22	5.34	8	0.03398
D	Quantile 2	GO:0009947	centrolateral axis specification	6	1.46	4	0.03399
D	Quantile 2	GO:0010865	stipule development	6	1.46	4	0.03399
D	Quantile 2	GO:0030388	fructose 1,6-bisphosphate metabolic process	6	1.46	4	0.03399
D	Quantile 2	GO:0033506	glucosinolate biosynthetic process from homomethionine	6	1.46	4	0.03399
D	Quantile 2	GO:0035269	protein O-linked mannosylation	6	1.46	4	0.03399
D	Quantile 2	GO:0043619	regulation of transcription from RNA polymerase II promoter in response to oxidative stress	6	1.46	4	0.03399
D	Quantile 2	GO:0046168	glycerol-3-phosphate catabolic process	6	1.46	4	0.03399
D	Quantile 2	GO:1902609	(R)-2-hydroxy-alpha-linolenic acid biosynthetic process	6	1.46	4	0.03399
D	Quantile 2	GO:0043562	cellular response to nitrogen levels	208	50.53	64	0.03413
D	Quantile 2	GO:0032973	amino acid export across plasma membrane	17	4.13	8	0.03426
D	Quantile 2	GO:0048481	plant ovule development	538	130.71	148	0.0355
D	Quantile 2	GO:0048510	regulation of timing of transition from vegetative to reproductive phase	80	19.44	27	0.0359
D	Quantile 2	GO:0009682	induced systemic resistance	333	80.9	103	0.03821
D	Quantile 2	GO:0010305	leaf vascular tissue pattern formation	363	88.19	103	0.04067
D	Quantile 2	GO:0010075	regulation of meristem growth	678	164.72	180	0.04202
D	Quantile 2	GO:0080117	secondary growth	245	59.52	72	0.04336
D	Quantile 2	GO:0005985	sucrose metabolic process	77	18.71	27	0.04349
D	Quantile 2	GO:0007021	tubulin complex assembly	9	2.19	5	0.04362
D	Quantile 2	GO:0090501	RNA phosphodiester bond hydrolysis	158	38.39	38	0.0437
D	Quantile 2	GO:0045087	innate immune response	3940	957.23	1042	0.04418
D	Quantile 2	GO:0071456	cellular response to hypoxia	161	39.12	49	0.04432
D	Quantile 2	GO:0009819	drought recovery	47	11.42	17	0.04605
D	Quantile 2	GO:0030834	regulation of actin filament depolymerization	24	5.83	11	0.04684
D	Quantile 2	GO:0010324	membrane invagination	4	0.97	3	0.0469
D	Quantile 2	GO:0010654	apical cell fate commitment	4	0.97	3	0.0469
D	Quantile 2	GO:0015819	lysine transport	4	0.97	3	0.0469
D	Quantile 2	GO:0016487	farnesol metabolic process	4	0.97	3	0.0469
D	Quantile 2	GO:0070085	glycosylation	357	86.73	84	0.04699
D	Quantile 2	GO:0002764	immune response-regulating signaling pathway	192	46.65	43	0.04701
D	Quantile 2	GO:0046283	anthocyanin-containing compound metabolic process	325	78.96	72	0.04705
D	Quantile 2	GO:0010951	negative regulation of endopeptidase activity	76	18.46	29	0.04855
D	Quantile 2	GO:0010264	myo-inositol hexakisphosphate biosynthetic process	61	14.82	21	0.04856
D	Quantile 2	GO:0010466	negative regulation of peptidase activity	110	26.72	42	0.04911
D	Quantile 2	GO:0035434	copper ion transmembrane transport	16	3.89	8	0.04915
D	Quantile 2	GO:0008610	lipid biosynthetic process	1882	457.23	412	0.04953
All	Quantile 3	GO:0046620	regulation of organ growth	624	156.64	140	6.8e-09
All	Quantile 3	GO:0050790	regulation of catalytic activity	2393	600.71	647	1.4e-08
All	Quantile 3	GO:0042545	cell wall modification	3014	756.6	746	4.2e-07
All	Quantile 3	GO:0043622	cortical microtubule organization	166	41.67	69	2.5e-06
All	Quantile 3	GO:0045893	positive regulation of transcription, DNA-templated	2325	583.64	690	2.9e-06
All	Quantile 3	GO:0080086	stamen filament development	170	42.67	70	3.2e-06
All	Quantile 3	GO:0046373	L-arabinose metabolic process	24	6.02	17	3.3e-06
All	Quantile 3	GO:0010336	gibberellic acid homeostasis	9	2.26	9	4e-06
All	Quantile 3	GO:0006306	DNA methylation	681	170.95	215	4.6e-06
All	Quantile 3	GO:0009638	phototropism	80	20.08	38	1.2e-05
All	Quantile 3	GO:0007049	cell cycle	4174	1047.79	1130	1.6e-05
All	Quantile 3	GO:0048366	leaf development	4388	1101.51	1091	1.8e-05
All	Quantile 3	GO:0016458	gene silencing	1737	436.04	506	1.8e-05
All	Quantile 3	GO:0000303	response to superoxide	220	55.23	77	1.9e-05
All	Quantile 3	GO:0009058	biosynthetic process	32430	8140.85	8446	2e-05
All	Quantile 3	GO:0009832	plant-type cell wall biogenesis	1330	333.87	409	2.2e-05
All	Quantile 3	GO:0009926	auxin polar transport	751	188.52	250	2.7e-05
All	Quantile 3	GO:0006597	spermine biosynthetic process	20	5.02	14	3.1e-05
All	Quantile 3	GO:0009819	drought recovery	144	36.15	58	4.5e-05
All	Quantile 3	GO:0009800	cinnamic acid biosynthetic process	56	14.06	28	5.3e-05
All	Quantile 3	GO:0006396	RNA processing	4360	1094.48	1202	5.8e-05
All	Quantile 3	GO:0009624	response to nematode	1295	325.08	386	6.3e-05
All	Quantile 3	GO:1901140	p-coumaryl alcohol transport	51	12.8	26	6.3e-05
All	Quantile 3	GO:0006596	polyamine biosynthetic process	88	22.09	43	7.2e-05
All	Quantile 3	GO:0042309	homoiothermy	3001	753.34	843	7.8e-05
All	Quantile 3	GO:0010071	root meristem specification	267	67.02	95	8.8e-05
All	Quantile 3	GO:0008216	spermidine metabolic process	73	18.33	40	9.6e-05
All	Quantile 3	GO:0010500	transmitting tissue development	31	7.78	18	9.7e-05
All	Quantile 3	GO:0010087	phloem or xylem histogenesis	1809	454.11	413	0.0001
All	Quantile 3	GO:0071366	cellular response to indolebutyric acid stimulus	55	13.81	27	0.00011
All	Quantile 3	GO:0045492	xylan biosynthetic process	780	195.8	242	0.00011
All	Quantile 3	GO:0010422	regulation of brassinosteroid biosynthetic process	138	34.64	55	0.00012
All	Quantile 3	GO:0008295	spermidine biosynthetic process	42	10.54	22	0.00014
All	Quantile 3	GO:0009908	flower development	6564	1647.75	1702	0.00014
All	Quantile 3	GO:0006357	regulation of transcription by RNA polymerase II	854	214.38	269	0.00015
All	Quantile 3	GO:0030245	cellulose catabolic process	83	20.84	36	0.00021
All	Quantile 3	GO:0006816	calcium ion transport	669	167.94	195	0.00024
All	Quantile 3	GO:0010541	acropetal auxin transport	69	17.32	31	0.00027
All	Quantile 3	GO:0048443	stamen development	2278	571.84	582	0.00027
All	Quantile 3	GO:0042344	indole glucosinolate catabolic process	90	22.59	38	0.00028
All	Quantile 3	GO:0010059	positive regulation of atrichoblast fate specification	252	63.26	88	0.00032
All	Quantile 3	GO:0010063	positive regulation of trichoblast fate specification	252	63.26	88	0.00032
All	Quantile 3	GO:0006782	protoporphyrinogen IX biosynthetic process	44	11.05	22	0.00033
All	Quantile 3	GO:0007000	nucleolus organization	70	17.57	31	0.00036
All	Quantile 3	GO:0045747	positive regulation of Notch signaling pathway	8	2.01	7	0.00039
All	Quantile 3	GO:0006221	pyrimidine nucleotide biosynthetic process	612	153.63	185	0.0004
All	Quantile 3	GO:0051457	maintenance of protein location in nucleus	12	3.01	9	0.0004
All	Quantile 3	GO:0042754	negative regulation of circadian rhythm	110	27.61	44	0.00042
All	Quantile 3	GO:0050826	response to freezing	3790	951.4	1036	0.00058
All	Quantile 3	GO:0031116	positive regulation of microtubule polymerization	50	12.55	24	0.00063
All	Quantile 3	GO:0052096	formation by symbiont of syncytium involving giant cell for nutrient acquisition from host	32	8.03	17	0.00063
All	Quantile 3	GO:2000652	regulation of secondary cell wall biogenesis	179	44.93	60	0.00065
All	Quantile 3	GO:0000467	exonucleolytic trimming to generate mature 3'-end of 5.8S rRNA from tricistronic rRNA transcript (SSU-rRNA, 5.8S rRNA, LSU-rRNA)	17	4.27	11	0.00065
All	Quantile 3	GO:0071035	nuclear polyadenylation-dependent rRNA catabolic process	17	4.27	11	0.00065
All	Quantile 3	GO:0071038	nuclear polyadenylation-dependent tRNA catabolic process	17	4.27	11	0.00065
All	Quantile 3	GO:0007155	cell adhesion	1372	344.41	343	0.00066
All	Quantile 3	GO:0016070	RNA metabolic process	17943	4504.2	4733	0.00067
All	Quantile 3	GO:0045732	positive regulation of protein catabolic process	146	36.65	57	0.00073
All	Quantile 3	GO:0010315	auxin efflux	100	25.1	40	0.00074
All	Quantile 3	GO:0000911	cytokinesis by cell plate formation	1068	268.1	316	0.00075
All	Quantile 3	GO:0007623	circadian rhythm	976	245	312	0.00075
All	Quantile 3	GO:0016572	histone phosphorylation	220	55.23	78	0.00083
All	Quantile 3	GO:0000082	G1/S transition of mitotic cell cycle	94	23.6	26	0.00086
All	Quantile 3	GO:0010351	lithium ion transport	123	30.88	47	0.0009
All	Quantile 3	GO:0048462	carpel formation	35	8.79	16	0.00097
All	Quantile 3	GO:0080126	ovary septum development	20	5.02	12	0.00097
All	Quantile 3	GO:0016554	cytidine to uridine editing	33	8.28	17	0.001
All	Quantile 3	GO:0006096	glycolytic process	989	248.27	291	0.00108
All	Quantile 3	GO:0015995	chlorophyll biosynthetic process	532	133.55	161	0.0011
All	Quantile 3	GO:0009827	plant-type cell wall modification	934	234.46	272	0.00111
All	Quantile 3	GO:0006071	glycerol metabolic process	85	21.34	31	0.00117
All	Quantile 3	GO:0048227	plasma membrane to endosome transport	11	2.76	8	0.00122
All	Quantile 3	GO:0006090	pyruvate metabolic process	1770	444.32	504	0.00126
All	Quantile 3	GO:0006680	glucosylceramide catabolic process	18	4.52	11	0.00129
All	Quantile 3	GO:0044347	cell wall polysaccharide catabolic process	18	4.52	11	0.00129
All	Quantile 3	GO:0045948	positive regulation of translational initiation	23	5.77	13	0.00129
All	Quantile 3	GO:0006833	water transport	1340	336.38	341	0.00133
All	Quantile 3	GO:0010540	basipetal auxin transport	138	34.64	51	0.00134
All	Quantile 3	GO:0030865	cortical cytoskeleton organization	175	43.93	76	0.00137
All	Quantile 3	GO:0043457	regulation of cellular respiration	7	1.76	6	0.00137
All	Quantile 3	GO:0033494	ferulate metabolic process	9	2.26	7	0.00138
All	Quantile 3	GO:0090431	alkyl caffeate ester biosynthetic process	9	2.26	7	0.00138
All	Quantile 3	GO:1901672	positive regulation of systemic acquired resistance	9	2.26	7	0.00138
All	Quantile 3	GO:0016197	endosomal transport	192	48.2	63	0.0014
All	Quantile 3	GO:0051301	cell division	3141	788.48	871	0.00152
All	Quantile 3	GO:0009051	pentose-phosphate shunt, oxidative branch	34	8.53	17	0.00153
All	Quantile 3	GO:0010262	somatic embryogenesis	34	8.53	17	0.00153
All	Quantile 3	GO:0048364	root development	6184	1552.36	1461	0.00169
All	Quantile 3	GO:0006206	pyrimidine nucleobase metabolic process	81	20.33	25	0.00175
All	Quantile 3	GO:0010413	glucuronoxylan metabolic process	680	170.7	205	0.00186
All	Quantile 3	GO:0007129	synapsis	325	81.58	101	0.00196
All	Quantile 3	GO:0071806	protein transmembrane transport	620	155.64	190	0.00204
All	Quantile 3	GO:0032875	regulation of DNA endoreduplication	101	25.35	36	0.00208
All	Quantile 3	GO:0002098	tRNA wobble uridine modification	41	10.29	18	0.00209
All	Quantile 3	GO:0048193	Golgi vesicle transport	1308	328.35	372	0.00216
All	Quantile 3	GO:0032922	circadian regulation of gene expression	24	6.02	13	0.00218
All	Quantile 3	GO:0052324	plant-type cell wall cellulose biosynthetic process	21	5.27	12	0.00222
All	Quantile 3	GO:0009888	tissue development	7444	1868.66	1893	0.00236
All	Quantile 3	GO:0009102	biotin biosynthetic process	19	4.77	11	0.00237
All	Quantile 3	GO:0010099	regulation of photomorphogenesis	168	42.17	59	0.00238
All	Quantile 3	GO:0048367	shoot system development	8919	2238.92	2400	0.00239
All	Quantile 3	GO:0007018	microtubule-based movement	212	53.22	72	0.00242
All	Quantile 3	GO:1902074	response to salt	66	16.57	23	0.00257
All	Quantile 3	GO:0009958	positive gravitropism	306	76.81	99	0.00258
All	Quantile 3	GO:0009734	auxin-activated signaling pathway	1614	405.16	472	0.00262
All	Quantile 3	GO:0090333	regulation of stomatal closure	87	21.84	34	0.00281
All	Quantile 3	GO:0046417	chorismate metabolic process	43	10.79	17	0.00286
All	Quantile 3	GO:0006657	CDP-choline pathway	12	3.01	8	0.00286
All	Quantile 3	GO:0080159	zygote elongation	12	3.01	8	0.00286
All	Quantile 3	GO:0010090	trichome morphogenesis	637	159.91	189	0.003
All	Quantile 3	GO:0033365	protein localization to organelle	2032	510.09	582	0.00302
All	Quantile 3	GO:0048829	root cap development	72	18.07	29	0.00331
All	Quantile 3	GO:0010021	amylopectin biosynthetic process	36	9.04	17	0.00333
All	Quantile 3	GO:0045490	pectin catabolic process	177	44.43	61	0.00339
All	Quantile 3	GO:0016123	xanthophyll biosynthetic process	66	16.57	27	0.00348
All	Quantile 3	GO:0000819	sister chromatid segregation	575	144.34	178	0.00356
All	Quantile 3	GO:0006265	DNA topological change	174	43.68	60	0.00358
All	Quantile 3	GO:0009073	aromatic amino acid family biosynthetic process	832	208.86	176	0.0036
All	Quantile 3	GO:0044774	mitotic DNA integrity checkpoint	85	21.34	19	0.0036
All	Quantile 3	GO:0016051	carbohydrate biosynthetic process	4366	1095.99	1141	0.00363
All	Quantile 3	GO:0007131	reciprocal meiotic recombination	529	132.79	160	0.00366
All	Quantile 3	GO:0008283	cell proliferation	1843	462.65	494	0.00383
All	Quantile 3	GO:0019344	cysteine biosynthetic process	764	191.79	220	0.00401
All	Quantile 3	GO:0042538	hyperosmotic salinity response	2173	545.48	593	0.00405
All	Quantile 3	GO:0035524	proline transmembrane transport	20	5.02	11	0.00408
All	Quantile 3	GO:0042732	D-xylose metabolic process	118	29.62	43	0.00409
All	Quantile 3	GO:0099402	plant organ development	10686	2682.49	2699	0.0043
All	Quantile 3	GO:0060213	positive regulation of nuclear-transcribed mRNA poly(A) tail shortening	8	2.01	6	0.00432
All	Quantile 3	GO:0006513	protein monoubiquitination	21	5.27	9	0.00432
All	Quantile 3	GO:1902806	regulation of cell cycle G1/S phase transition	72	18.07	16	0.00433
All	Quantile 3	GO:0006891	intra-Golgi vesicle-mediated transport	269	67.53	87	0.0045
All	Quantile 3	GO:0009107	lipoate biosynthetic process	34	8.53	16	0.00454
All	Quantile 3	GO:0006629	lipid metabolic process	8716	2187.96	2231	0.00467
All	Quantile 3	GO:0010376	stomatal complex formation	6	1.51	5	0.00473
All	Quantile 3	GO:0031119	tRNA pseudouridine synthesis	6	1.51	5	0.00473
All	Quantile 3	GO:0071332	cellular response to fructose stimulus	6	1.51	5	0.00473
All	Quantile 3	GO:0090153	regulation of sphingolipid biosynthetic process	6	1.51	5	0.00473
All	Quantile 3	GO:2000025	regulation of leaf formation	6	1.51	5	0.00473
All	Quantile 3	GO:0009820	alkaloid metabolic process	49	12.3	14	0.00473
All	Quantile 3	GO:0060919	auxin influx	64	16.07	27	0.00478
All	Quantile 3	GO:0010160	formation of animal organ boundary	58	14.56	24	0.00479
All	Quantile 3	GO:0098712	L-glutamate import across plasma membrane	23	5.77	12	0.00481
All	Quantile 3	GO:0042254	ribosome biogenesis	1625	407.92	469	0.00506
All	Quantile 3	GO:0042127	regulation of cell proliferation	1224	307.26	309	0.00515
All	Quantile 3	GO:0019748	secondary metabolic process	5420	1360.57	1315	0.00515
All	Quantile 3	GO:0009750	response to fructose	847	212.62	249	0.00528
All	Quantile 3	GO:0045132	meiotic chromosome segregation	559	140.32	185	0.0053
All	Quantile 3	GO:0007568	aging	1832	459.88	453	0.00545
All	Quantile 3	GO:1901141	regulation of lignin biosynthetic process	176	44.18	50	0.00547
All	Quantile 3	GO:0009741	response to brassinosteroid	2048	514.11	496	0.00553
All	Quantile 3	GO:0071668	plant-type cell wall assembly	96	24.1	35	0.00558
All	Quantile 3	GO:0052325	cell wall pectin biosynthetic process	47	11.8	16	0.00559
All	Quantile 3	GO:0042744	hydrogen peroxide catabolic process	687	172.46	202	0.00572
All	Quantile 3	GO:1901371	regulation of leaf morphogenesis	19	4.77	13	0.00579
All	Quantile 3	GO:0031425	chloroplast RNA processing	418	104.93	125	0.00581
All	Quantile 3	GO:0080092	regulation of pollen tube growth	454	113.97	138	0.00604
All	Quantile 3	GO:0010107	potassium ion import	184	46.19	61	0.00627
All	Quantile 3	GO:0009957	epidermal cell fate specification	56	14.06	23	0.00633
All	Quantile 3	GO:0008356	asymmetric cell division	163	40.92	58	0.00641
All	Quantile 3	GO:0030307	positive regulation of cell growth	51	12.8	21	0.00644
All	Quantile 3	GO:0015994	chlorophyll metabolic process	798	200.32	242	0.00644
All	Quantile 3	GO:0042761	very long-chain fatty acid biosynthetic process	124	31.13	44	0.00645
All	Quantile 3	GO:0007020	microtubule nucleation	283	71.04	89	0.00669
All	Quantile 3	GO:0000085	mitotic G2 phase	131	32.88	46	0.00677
All	Quantile 3	GO:0009658	chloroplast organization	1006	252.53	282	0.00689
All	Quantile 3	GO:0007267	cell-cell signaling	348	87.36	108	0.00699
All	Quantile 3	GO:0061136	regulation of proteasomal protein catabolic process	212	53.22	76	0.00699
All	Quantile 3	GO:0080026	response to indolebutyric acid	79	19.83	39	0.00741
All	Quantile 3	GO:0010581	regulation of starch biosynthetic process	11	2.76	7	0.00774
All	Quantile 3	GO:0050665	hydrogen peroxide biosynthetic process	308	77.32	97	0.00786
All	Quantile 3	GO:0009116	nucleoside metabolic process	329	82.59	111	0.00826
All	Quantile 3	GO:0006914	autophagy	314	78.82	102	0.00829
All	Quantile 3	GO:0046939	nucleotide phosphorylation	1060	266.09	318	0.00867
All	Quantile 3	GO:0007596	blood coagulation	70	17.57	27	0.00883
All	Quantile 3	GO:0048528	post-embryonic root development	2181	547.49	494	0.00883
All	Quantile 3	GO:0016569	covalent chromatin modification	1817	456.12	532	0.00895
All	Quantile 3	GO:0010098	suspensor development	42	10.54	18	0.00897
All	Quantile 3	GO:0071333	cellular response to glucose stimulus	77	19.33	31	0.00897
All	Quantile 3	GO:0000280	nuclear division	1387	348.18	422	0.00902
All	Quantile 3	GO:0010337	regulation of salicylic acid metabolic process	81	20.33	30	0.0092
All	Quantile 3	GO:0031048	chromatin silencing by small RNA	415	104.18	131	0.00946
All	Quantile 3	GO:0030154	cell differentiation	7283	1828.24	1927	0.00949
All	Quantile 3	GO:0006270	DNA replication initiation	234	58.74	75	0.00993
All	Quantile 3	GO:0051453	regulation of intracellular pH	82	20.58	29	0.00996
All	Quantile 3	GO:0009736	cytokinin-activated signaling pathway	418	104.93	121	0.00996
All	Quantile 3	GO:0019079	viral genome replication	33	8.28	15	0.0102
All	Quantile 3	GO:0000412	histone peptidyl-prolyl isomerization	9	2.26	6	0.01021
All	Quantile 3	GO:0006003	fructose 2,6-bisphosphate metabolic process	9	2.26	6	0.01021
All	Quantile 3	GO:0006557	S-adenosylmethioninamine biosynthetic process	9	2.26	6	0.01021
All	Quantile 3	GO:0034473	U1 snRNA 3'-end processing	9	2.26	6	0.01021
All	Quantile 3	GO:0034476	U5 snRNA 3'-end processing	9	2.26	6	0.01021
All	Quantile 3	GO:0071042	nuclear polyadenylation-dependent mRNA catabolic process	9	2.26	6	0.01021
All	Quantile 3	GO:2000469	negative regulation of peroxidase activity	9	2.26	6	0.01021
All	Quantile 3	GO:2001294	malonyl-CoA catabolic process	9	2.26	6	0.01021
All	Quantile 3	GO:0016104	triterpenoid biosynthetic process	144	36.15	34	0.01022
All	Quantile 3	GO:0009249	protein lipoylation	22	5.52	11	0.01029
All	Quantile 3	GO:0070676	intralumenal vesicle formation	22	5.52	11	0.01029
All	Quantile 3	GO:0045010	actin nucleation	410	102.92	123	0.01043
All	Quantile 3	GO:0015810	aspartate transmembrane transport	14	3.51	8	0.01057
All	Quantile 3	GO:0015827	tryptophan transport	14	3.51	8	0.01057
All	Quantile 3	GO:0046740	transport of virus in host, cell to cell	14	3.51	8	0.01057
All	Quantile 3	GO:0043570	maintenance of DNA repeat elements	23	5.77	10	0.01058
All	Quantile 3	GO:0055065	metal ion homeostasis	2096	526.16	526	0.01059
All	Quantile 3	GO:0009739	response to gibberellin	1197	300.48	297	0.01068
All	Quantile 3	GO:0051788	response to misfolded protein	922	231.45	263	0.01154
All	Quantile 3	GO:0045944	positive regulation of transcription by RNA polymerase II	335	84.09	102	0.0116
All	Quantile 3	GO:0001709	cell fate determination	49	12.3	22	0.01162
All	Quantile 3	GO:0015692	lead ion transport	65	16.32	25	0.01193
All	Quantile 3	GO:0051403	stress-activated MAPK cascade	65	16.32	25	0.01193
All	Quantile 3	GO:0070919	production of siRNA involved in chromatin silencing by small RNA	31	7.78	14	0.01195
All	Quantile 3	GO:0019243	methylglyoxal catabolic process to D-lactate via S-lactoyl-glutathione	257	64.51	81	0.01196
All	Quantile 3	GO:0080186	developmental vegetative growth	34	8.53	15	0.01211
All	Quantile 3	GO:0034765	regulation of ion transmembrane transport	1203	301.99	279	0.01227
All	Quantile 3	GO:0010105	negative regulation of ethylene-activated signaling pathway	108	27.11	38	0.01248
All	Quantile 3	GO:0016926	protein desumoylation	304	76.31	94	0.01264
All	Quantile 3	GO:0042823	pyridoxal phosphate biosynthetic process	35	8.79	12	0.01273
All	Quantile 3	GO:0010817	regulation of hormone levels	5937	1490.36	1467	0.01361
All	Quantile 3	GO:0000070	mitotic sister chromatid segregation	124	31.13	42	0.01455
All	Quantile 3	GO:0043097	pyrimidine nucleoside salvage	27	6.78	12	0.01457
All	Quantile 3	GO:0031022	nuclear migration along microfilament	12	3.01	7	0.01458
All	Quantile 3	GO:0006490	oligosaccharide-lipid intermediate biosynthetic process	24	6.02	9	0.01458
All	Quantile 3	GO:0046856	phosphatidylinositol dephosphorylation	79	19.83	29	0.0146
All	Quantile 3	GO:0002181	cytoplasmic translation	195	48.95	55	0.01467
All	Quantile 3	GO:0006012	galactose metabolic process	102	25.6	36	0.01483
All	Quantile 3	GO:0009909	regulation of flower development	2469	619.79	614	0.01522
All	Quantile 3	GO:0015825	L-serine transport	23	5.77	11	0.01531
All	Quantile 3	GO:0006268	DNA unwinding involved in DNA replication	44	11.05	18	0.01545
All	Quantile 3	GO:0042138	meiotic DNA double-strand break formation	292	73.3	90	0.01567
All	Quantile 3	GO:0010018	far-red light signaling pathway	86	21.59	31	0.01569
All	Quantile 3	GO:0007015	actin filament organization	558	140.07	166	0.0157
All	Quantile 3	GO:0048609	multicellular organismal reproductive process	3053	766.39	781	0.01579
All	Quantile 3	GO:1901605	alpha-amino acid metabolic process	3005	754.34	758	0.01581
All	Quantile 3	GO:0009093	cysteine catabolic process	11	2.76	6	0.01581
All	Quantile 3	GO:0015743	malate transport	46	11.55	14	0.01582
All	Quantile 3	GO:0010084	specification of animal organ axis polarity	3	0.75	3	0.01582
All	Quantile 3	GO:0010477	response to sulfur dioxide	3	0.75	3	0.01582
All	Quantile 3	GO:0016046	detection of fungus	3	0.75	3	0.01582
All	Quantile 3	GO:0018160	peptidyl-pyrromethane cofactor linkage	3	0.75	3	0.01582
All	Quantile 3	GO:0031940	positive regulation of chromatin silencing at telomere	3	0.75	3	0.01582
All	Quantile 3	GO:0032258	protein localization by the Cvt pathway	3	0.75	3	0.01582
All	Quantile 3	GO:0032467	positive regulation of cytokinesis	3	0.75	3	0.01582
All	Quantile 3	GO:0032953	regulation of (1->3)-beta-D-glucan biosynthetic process	3	0.75	3	0.01582
All	Quantile 3	GO:0034089	establishment of meiotic sister chromatid cohesion	3	0.75	3	0.01582
All	Quantile 3	GO:0035407	histone H3-T11 phosphorylation	3	0.75	3	0.01582
All	Quantile 3	GO:0043482	cellular pigment accumulation	3	0.75	3	0.01582
All	Quantile 3	GO:0048867	stem cell fate determination	3	0.75	3	0.01582
All	Quantile 3	GO:0071951	conversion of methionyl-tRNA to N-formyl-methionyl-tRNA	3	0.75	3	0.01582
All	Quantile 3	GO:0072355	histone H3-T3 phosphorylation	3	0.75	3	0.01582
All	Quantile 3	GO:0080157	regulation of plant-type cell wall organization or biogenesis	3	0.75	3	0.01582
All	Quantile 3	GO:0090053	positive regulation of chromatin silencing at centromere	3	0.75	3	0.01582
All	Quantile 3	GO:0090400	stress-induced premature senescence	3	0.75	3	0.01582
All	Quantile 3	GO:0090549	response to carbon starvation	3	0.75	3	0.01582
All	Quantile 3	GO:1901997	negative regulation of indoleacetic acid biosynthetic process via tryptophan	3	0.75	3	0.01582
All	Quantile 3	GO:1902325	negative regulation of chlorophyll biosynthetic process	3	0.75	3	0.01582
All	Quantile 3	GO:1904222	positive regulation of serine C-palmitoyltransferase activity	3	0.75	3	0.01582
All	Quantile 3	GO:1904250	positive regulation of age-related resistance	3	0.75	3	0.01582
All	Quantile 3	GO:2000694	regulation of phragmoplast microtubule organization	3	0.75	3	0.01582
All	Quantile 3	GO:2000786	positive regulation of autophagosome assembly	3	0.75	3	0.01582
All	Quantile 3	GO:2000104	negative regulation of DNA-dependent DNA replication	35	8.79	11	0.01582
All	Quantile 3	GO:0006482	protein demethylation	45	11.3	12	0.01582
[truncated: 1,937 more rows]

## Sheet: TableS5
Supplemental Table S5. High-level gene ontology (GO slim) term enrichment analysis of genes grouped by decreasing crossover rate. Genes grouped into four quantiles defined by decreasing crossover rate (cM/Mb) (across all subgenomes or within each subgenome) were analyzed for enrichment of “biological process” GO slim terms, relative to their representation among all genes in the genome or the cor…
Subgenome	cM/Mb gene quantile	GO ID	GO term	Annotated genes in subgenome	Expected genes in quantile	Observed genes in quantile	P-value
All	Quantile 1	GO:0006950	response to stress	37670	9137.6	9984	1e-30
All	Quantile 1	GO:0008219	cell death	6322	1533.53	2003	1e-30
All	Quantile 1	GO:0009605	response to external stimulus	21336	5175.47	5834	1e-30
All	Quantile 1	GO:0009607	response to biotic stimulus	16668	4043.15	4704	1e-30
All	Quantile 1	GO:0007154	cell communication	17752	4306.1	4392	5e-17
All	Quantile 1	GO:0019748	secondary metabolic process	5015	1216.49	1352	2.7e-06
All	Quantile 1	GO:0040007	growth	7125	1728.31	1725	7.2e-05
All	Quantile 1	GO:0006629	lipid metabolic process	8181	1984.46	2089	0.0024
All	Quantile 1	GO:0009991	response to extracellular stimulus	4224	1024.61	1096	0.0046
All	Quantile 1	GO:0009628	response to abiotic stimulus	27058	6563.45	6666	0.0364
A	Quantile 1	GO:0008219	cell death	2094	509.5	653	6.2e-14
A	Quantile 1	GO:0006950	response to stress	12520	3046.29	3262	1.9e-10
A	Quantile 1	GO:0009605	response to external stimulus	7052	1715.85	1825	4.5e-06
A	Quantile 1	GO:0009607	response to biotic stimulus	5495	1337.01	1452	2.7e-05
A	Quantile 1	GO:0007154	cell communication	5868	1427.77	1452	7.2e-05
A	Quantile 1	GO:0040007	growth	2341	569.6	539	0.0052
A	Quantile 1	GO:0006464	cellular protein modification process	5140	1250.63	1315	0.0104
A	Quantile 1	GO:0019748	secondary metabolic process	1631	396.84	426	0.0445
A	Quantile 1	GO:0009875	pollen-pistil interaction	184	44.77	55	0.049
B	Quantile 1	GO:0006950	response to stress	12784	3120.45	3522	1e-30
B	Quantile 1	GO:0009605	response to external stimulus	7168	1749.64	2067	1e-29
B	Quantile 1	GO:0009607	response to biotic stimulus	5601	1367.15	1692	2.2e-29
B	Quantile 1	GO:0008219	cell death	2154	525.77	728	7.9e-25
B	Quantile 1	GO:0007154	cell communication	5942	1450.38	1527	3.4e-10
B	Quantile 1	GO:0006629	lipid metabolic process	2713	662.22	739	0.00018
B	Quantile 1	GO:0040007	growth	2331	568.97	579	0.00034
B	Quantile 1	GO:0019748	secondary metabolic process	1642	400.8	442	0.0083
D	Quantile 1	GO:0009607	response to biotic stimulus	5572	1332.87	1589	1.7e-19
D	Quantile 1	GO:0008219	cell death	2074	496.12	662	3.3e-18
D	Quantile 1	GO:0009605	response to external stimulus	7116	1702.21	1987	7.8e-18
D	Quantile 1	GO:0006950	response to stress	12366	2958.06	3244	2.7e-17
D	Quantile 1	GO:0007154	cell communication	5942	1421.38	1493	3e-09
D	Quantile 1	GO:0009991	response to extracellular stimulus	1390	332.5	404	3.4e-06
D	Quantile 1	GO:0019748	secondary metabolic process	1742	416.7	493	7.2e-06
D	Quantile 1	GO:0009628	response to abiotic stimulus	8980	2148.09	2251	0.00085
D	Quantile 1	GO:0006629	lipid metabolic process	2748	657.35	715	0.00362
D	Quantile 1	GO:0008152	metabolic process	18669	4465.79	4357	0.01
D	Quantile 1	GO:0009719	response to endogenous stimulus	5303	1268.52	1318	0.03859
All	Quantile 2	GO:0008219	cell death	6322	1550.37	1744	2.9e-09
All	Quantile 2	GO:0009607	response to biotic stimulus	16668	4087.56	4330	4.9e-07
All	Quantile 2	GO:0009875	pollen-pistil interaction	567	139.05	187	3.3e-06
All	Quantile 2	GO:0009991	response to extracellular stimulus	4224	1035.87	1160	3.5e-06
All	Quantile 2	GO:0006950	response to stress	37670	9237.96	9507	3.6e-06
All	Quantile 2	GO:0009605	response to external stimulus	21336	5232.31	5497	5.2e-05
All	Quantile 2	GO:0009838	abscission	806	197.66	246	5.9e-05
All	Quantile 2	GO:0009719	response to endogenous stimulus	15569	3818.05	3994	0.00013
All	Quantile 2	GO:0007165	signal transduction	13236	3245.92	3409	0.00016
All	Quantile 2	GO:0006464	cellular protein modification process	15882	3894.81	4066	0.00022
All	Quantile 2	GO:0019725	cellular homeostasis	1961	480.9	529	0.00606
All	Quantile 2	GO:0007154	cell communication	17752	4353.39	4586	0.00615
All	Quantile 2	GO:0009908	flower development	6004	1472.38	1528	0.04297
A	Quantile 2	GO:0009991	response to extracellular stimulus	1396	345.32	419	2.3e-06
A	Quantile 2	GO:0009607	response to biotic stimulus	5495	1359.26	1472	4.2e-05
A	Quantile 2	GO:0008219	cell death	2094	517.98	591	7.7e-05
A	Quantile 2	GO:0009719	response to endogenous stimulus	5129	1268.72	1351	0.0016
A	Quantile 2	GO:0009605	response to external stimulus	7052	1744.4	1853	0.0181
A	Quantile 2	GO:0006950	response to stress	12520	3096.98	3163	0.029
B	Quantile 2	GO:0006950	response to stress	12784	3131.23	3239	0.001
B	Quantile 2	GO:0019725	cellular homeostasis	645	157.98	192	0.0011
B	Quantile 2	GO:0009908	flower development	2006	491.34	546	0.0019
B	Quantile 2	GO:0006464	cellular protein modification process	5360	1312.84	1391	0.0029
B	Quantile 2	GO:0007154	cell communication	5942	1455.39	1509	0.0043
B	Quantile 2	GO:0009838	abscission	260	63.68	80	0.0123
B	Quantile 2	GO:0009991	response to extracellular stimulus	1438	352.21	386	0.0186
D	Quantile 2	GO:0009875	pollen-pistil interaction	189	45.99	67	0.00039
D	Quantile 2	GO:0019725	cellular homeostasis	660	160.59	187	0.0094
D	Quantile 2	GO:0008219	cell death	2074	504.65	549	0.01004
D	Quantile 2	GO:0009605	response to external stimulus	7116	1731.48	1774	0.0201
D	Quantile 2	GO:0009607	response to biotic stimulus	5572	1355.79	1411	0.02696
All	Quantile 3	GO:0006139	nucleobase-containing compound metabolic process	22849	5679.6	6102	3.9e-11
All	Quantile 3	GO:0009058	biosynthetic process	31681	7874.97	8245	8e-10
All	Quantile 3	GO:0016043	cellular component organization	19283	4793.19	5095	4e-09
All	Quantile 3	GO:0000003	reproduction	15565	3869.01	4080	9.1e-07
All	Quantile 3	GO:0009791	post-embryonic development	15121	3758.64	3960	3.5e-06
All	Quantile 3	GO:0006259	DNA metabolic process	4160	1034.05	1154	6.6e-06
All	Quantile 3	GO:0009056	catabolic process	12331	3065.13	3247	2e-05
All	Quantile 3	GO:0005975	carbohydrate metabolic process	6623	1646.28	1785	2.3e-05
All	Quantile 3	GO:0009987	cellular process	60993	15161.1	15324	0.0001
All	Quantile 3	GO:0007049	cell cycle	4055	1007.95	1091	0.0011
All	Quantile 3	GO:0040029	regulation of gene expression, epigenetic	1514	376.34	424	0.0025
All	Quantile 3	GO:0008152	metabolic process	55817	13874.5	14262	0.0033
All	Quantile 3	GO:0030154	cell differentiation	6429	1598.06	1684	0.0052
All	Quantile 3	GO:0006810	transport	15624	3883.67	4003	0.007
All	Quantile 3	GO:0009653	anatomical structure morphogenesis	10306	2561.77	2656	0.0111
All	Quantile 3	GO:0007275	multicellular organism development	20613	5123.79	5375	0.0145
All	Quantile 3	GO:0009606	tropism	1281	318.42	351	0.019
All	Quantile 3	GO:0016049	cell growth	4764	1184.19	1244	0.0205
All	Quantile 3	GO:0009790	embryo development	4238	1053.44	1101	0.0432
All	Quantile 3	GO:0006412	translation	1755	436.24	467	0.0462
A	Quantile 3	GO:0016043	cellular component organization	6382	1374.19	1541	3.5e-09
A	Quantile 3	GO:0009058	biosynthetic process	10433	2246.46	2422	2.8e-08
A	Quantile 3	GO:0006139	nucleobase-containing compound metabolic process	7527	1620.74	1789	5.1e-07
A	Quantile 3	GO:0009653	anatomical structure morphogenesis	3389	729.73	808	0.00027
A	Quantile 3	GO:0030154	cell differentiation	2094	450.89	510	0.00066
A	Quantile 3	GO:0000003	reproduction	5126	1103.75	1197	0.00089
A	Quantile 3	GO:0007049	cell cycle	1342	288.96	332	0.00211
A	Quantile 3	GO:0007275	multicellular organism development	6803	1464.84	1564	0.00224
A	Quantile 3	GO:0016049	cell growth	1569	337.84	382	0.00313
A	Quantile 3	GO:0006259	DNA metabolic process	1382	297.58	339	0.00328
A	Quantile 3	GO:0009987	cellular process	20130	4334.45	4422	0.00452
A	Quantile 3	GO:0006810	transport	5207	1121.19	1185	0.00864
A	Quantile 3	GO:0009056	catabolic process	4016	864.74	922	0.00913
A	Quantile 3	GO:0040029	regulation of gene expression, epigenetic	498	107.23	129	0.0107
A	Quantile 3	GO:0009791	post-embryonic development	4966	1069.29	1127	0.01268
A	Quantile 3	GO:0009856	pollination	1141	245.68	274	0.01785
A	Quantile 3	GO:0009606	tropism	426	91.73	109	0.02476
A	Quantile 3	GO:0005975	carbohydrate metabolic process	2232	480.6	514	0.03885
B	Quantile 3	GO:0009058	biosynthetic process	10546	2641.25	2748	0.0009
B	Quantile 3	GO:0006139	nucleobase-containing compound metabolic process	7676	1922.46	2024	0.0018
B	Quantile 3	GO:0000003	reproduction	5176	1296.33	1313	0.0057
B	Quantile 3	GO:0007049	cell cycle	1343	336.35	374	0.0086
B	Quantile 3	GO:0009987	cellular process	20497	5133.48	5134	0.0135
B	Quantile 3	GO:0009056	catabolic process	4123	1032.61	1089	0.0146
D	Quantile 3	GO:0006259	DNA metabolic process	1329	323.17	380	0.00014
D	Quantile 3	GO:0005975	carbohydrate metabolic process	2231	542.5	601	0.0015
D	Quantile 3	GO:0000003	reproduction	5263	1279.78	1334	0.00173
D	Quantile 3	GO:0006139	nucleobase-containing compound metabolic process	7646	1859.24	1984	0.0025
D	Quantile 3	GO:0009791	post-embryonic development	5100	1240.14	1299	0.00288
D	Quantile 3	GO:0009058	biosynthetic process	10702	2602.35	2699	0.00358
D	Quantile 3	GO:0008152	metabolic process	18669	4539.65	4693	0.00652
D	Quantile 3	GO:0007275	multicellular organism development	6954	1690.97	1789	0.00818
D	Quantile 3	GO:0009987	cellular process	20366	4952.3	5024	0.00932
D	Quantile 3	GO:0009056	catabolic process	4192	1019.35	1068	0.02934
D	Quantile 3	GO:0016043	cellular component organization	6523	1586.16	1639	0.04025
All	Quantile 4	GO:0006091	generation of precursor metabolites and energy	3218	807.39	1030	1.2e-19
All	Quantile 4	GO:0015979	photosynthesis	1389	348.5	494	1.3e-18
All	Quantile 4	GO:0006139	nucleobase-containing compound metabolic process	22849	5732.79	6207	5.1e-13
All	Quantile 4	GO:0016043	cellular component organization	19283	4838.08	5176	6e-11
All	Quantile 4	GO:0006810	transport	15624	3920.04	4226	1.8e-10
All	Quantile 4	GO:0006259	DNA metabolic process	4160	1043.74	1189	7.5e-08
All	Quantile 4	GO:0009987	cellular process	60993	15303.1	15590	3.2e-07
All	Quantile 4	GO:0009058	biosynthetic process	31681	7948.73	8279	7.9e-07
All	Quantile 4	GO:0005975	carbohydrate metabolic process	6623	1661.7	1821	1.5e-06
All	Quantile 4	GO:0006412	translation	1755	440.33	523	3.5e-06
All	Quantile 4	GO:0007049	cell cycle	4055	1017.39	1133	1.1e-05
All	Quantile 4	GO:0040029	regulation of gene expression, epigenetic	1514	379.86	446	5.5e-05
All	Quantile 4	GO:0009606	tropism	1281	321.4	382	6.2e-05
All	Quantile 4	GO:0030154	cell differentiation	6429	1613.03	1735	0.00014
All	Quantile 4	GO:0009653	anatomical structure morphogenesis	10306	2585.76	2709	0.00142
All	Quantile 4	GO:0016049	cell growth	4764	1195.28	1262	0.01148
All	Quantile 4	GO:0009856	pollination	3490	875.64	916	0.02351
All	Quantile 4	GO:0007275	multicellular organism development	20613	5171.78	5247	0.03418
All	Quantile 4	GO:0019725	cellular homeostasis	1961	492.01	525	0.04397
A	Quantile 4	GO:0006091	generation of precursor metabolites and energy	1034	297.48	372	1.8e-07
A	Quantile 4	GO:0015979	photosynthesis	426	122.56	169	7.3e-07
A	Quantile 4	GO:0006139	nucleobase-containing compound metabolic process	7527	2165.47	2341	9.6e-06
A	Quantile 4	GO:0016043	cellular component organization	6382	1836.06	1956	7.4e-05
A	Quantile 4	GO:0009058	biosynthetic process	10433	3001.51	3139	0.00016
A	Quantile 4	GO:0006259	DNA metabolic process	1382	397.59	456	0.00024
A	Quantile 4	GO:0005975	carbohydrate metabolic process	2232	642.13	712	0.00038
A	Quantile 4	GO:0006810	transport	5207	1498.02	1586	0.0014
A	Quantile 4	GO:0009987	cellular process	20130	5791.28	5875	0.00262
A	Quantile 4	GO:0030154	cell differentiation	2094	602.43	658	0.00294
A	Quantile 4	GO:0016049	cell growth	1569	451.39	500	0.00301
A	Quantile 4	GO:0009628	response to abiotic stimulus	8987	2585.51	2673	0.00602
A	Quantile 4	GO:0009653	anatomical structure morphogenesis	3389	975	1032	0.01094
A	Quantile 4	GO:0009908	flower development	1936	556.98	600	0.01361
A	Quantile 4	GO:0009606	tropism	426	122.56	143	0.01667
A	Quantile 4	GO:0040029	regulation of gene expression, epigenetic	498	143.27	165	0.01785
A	Quantile 4	GO:0007049	cell cycle	1342	386.09	415	0.03987
B	Quantile 4	GO:0006139	nucleobase-containing compound metabolic process	7676	1945.98	2185	1.4e-10
B	Quantile 4	GO:0006091	generation of precursor metabolites and energy	1039	263.4	339	5e-08
B	Quantile 4	GO:0016043	cellular component organization	6378	1616.92	1774	1.3e-07
B	Quantile 4	GO:0015979	photosynthesis	430	109.01	155	4.7e-07
B	Quantile 4	GO:0009058	biosynthetic process	10546	2673.57	2857	1.1e-06
B	Quantile 4	GO:0006810	transport	5232	1326.39	1460	1.3e-06
B	Quantile 4	GO:0005975	carbohydrate metabolic process	2160	547.59	636	3.8e-06
B	Quantile 4	GO:0006259	DNA metabolic process	1449	367.34	435	2e-05
B	Quantile 4	GO:0009987	cellular process	20497	5196.3	5354	0.00028
B	Quantile 4	GO:0006412	translation	606	153.63	191	0.00032
B	Quantile 4	GO:0030154	cell differentiation	2131	540.24	606	0.0004
B	Quantile 4	GO:0007049	cell cycle	1343	340.47	393	0.00047
B	Quantile 4	GO:0009653	anatomical structure morphogenesis	3402	862.46	941	0.00053
B	Quantile 4	GO:0009856	pollination	1153	292.3	338	0.00378
B	Quantile 4	GO:0000003	reproduction	5176	1312.19	1400	0.01199
B	Quantile 4	GO:0016049	cell growth	1558	394.98	432	0.01471
B	Quantile 4	GO:0007275	multicellular organism development	6856	1738.1	1804	0.03181
B	Quantile 4	GO:0008152	metabolic process	18707	4742.51	4928	0.04352
B	Quantile 4	GO:0040029	regulation of gene expression, epigenetic	516	130.81	148	0.04539
B	Quantile 4	GO:0009791	post-embryonic development	5055	1281.52	1317	0.04541
D	Quantile 4	GO:0006091	generation of precursor metabolites and energy	1145	285.42	357	5.9e-07
D	Quantile 4	GO:0015979	photosynthesis	533	132.86	180	2.4e-06
D	Quantile 4	GO:0006810	transport	5185	1292.49	1408	2e-05
D	Quantile 4	GO:0040029	regulation of gene expression, epigenetic	500	124.64	160	0.00019
D	Quantile 4	GO:0016043	cellular component organization	6523	1626.02	1726	0.00051
D	Quantile 4	GO:0009606	tropism	428	106.69	137	0.00052
D	Quantile 4	GO:0007049	cell cycle	1370	341.51	391	0.00095
D	Quantile 4	GO:0006139	nucleobase-containing compound metabolic process	7646	1905.96	2016	0.00143
D	Quantile 4	GO:0006412	translation	555	138.35	167	0.00303
D	Quantile 4	GO:0009987	cellular process	20366	5076.74	5140	0.00599
D	Quantile 4	GO:0006259	DNA metabolic process	1329	331.29	360	0.03389

## Sheet: TableS6
Supplemental Table S6. GO term enrichment analysis of genes grouped by decreasing DMC1 ChIP-seq signal. Genes grouped into four quantiles defined by decreasing DMC1 ChIP-seq signal (log2[ChIP/input]) (across all subgenomes or within each subgenome) were analyzed for enrichment of “biological process” GO terms, relative to their representation among all genes in the genome or the corresponding sub…
Subgenome	DMC1 gene quantile	GO ID	GO term	Annotated genes in subgenome	Expected genes in quantile	Observed genes in quantile	P-value
All	Quantile 1	GO:0006354	DNA-templated transcription, elongation	612	154.72	369	1e-30
All	Quantile 1	GO:0006412	translation	3383	855.24	1201	4.7e-28
All	Quantile 1	GO:0006091	generation of precursor metabolites and energy	3337	843.61	1109	4.5e-18
All	Quantile 1	GO:0019684	photosynthesis, light reaction	1316	332.69	504	1.2e-17
All	Quantile 1	GO:0010207	photosystem II assembly	632	159.77	252	8e-15
All	Quantile 1	GO:0006606	protein import into nucleus	424	107.19	175	2.5e-13
All	Quantile 1	GO:0042773	ATP synthesis coupled electron transport	200	50.56	103	8.9e-12
All	Quantile 1	GO:0006413	translational initiation	457	115.53	192	4.6e-11
All	Quantile 1	GO:0015979	photosynthesis	1878	474.77	706	8.5e-11
All	Quantile 1	GO:0006406	mRNA export from nucleus	293	74.07	126	1.2e-10
All	Quantile 1	GO:0001510	RNA methylation	759	191.88	285	5.1e-10
All	Quantile 1	GO:0009560	embryo sac egg cell differentiation	421	106.43	161	3.2e-09
All	Quantile 1	GO:0006810	transport	16682	4217.29	4304	6.2e-09
All	Quantile 1	GO:0051788	response to misfolded protein	922	233.09	306	2.4e-08
All	Quantile 1	GO:0006506	GPI anchor biosynthetic process	95	24.02	53	7.6e-08
All	Quantile 1	GO:0000028	ribosomal small subunit assembly	62	15.67	35	9.7e-08
All	Quantile 1	GO:0000394	RNA splicing, via endonucleolytic cleavage and ligation	528	133.48	188	1.1e-07
All	Quantile 1	GO:0000398	mRNA splicing, via spliceosome	656	165.84	222	3.3e-07
All	Quantile 1	GO:0009561	megagametogenesis	1599	404.24	450	3.8e-07
All	Quantile 1	GO:0009853	photorespiration	601	151.94	203	5.8e-07
All	Quantile 1	GO:0016444	somatic cell DNA recombination	122	30.84	56	6.5e-07
All	Quantile 1	GO:0007129	synapsis	325	82.16	117	6.8e-07
All	Quantile 1	GO:0006468	protein phosphorylation	7806	1973.4	2013	7.8e-07
All	Quantile 1	GO:0045338	farnesyl diphosphate metabolic process	63	15.93	31	1.1e-06
All	Quantile 1	GO:0006623	protein targeting to vacuole	509	128.68	178	1.2e-06
All	Quantile 1	GO:0009767	photosynthetic electron transport chain	396	100.11	149	1.3e-06
All	Quantile 1	GO:0006646	phosphatidylethanolamine biosynthetic process	21	5.31	16	1.5e-06
All	Quantile 1	GO:0032543	mitochondrial translation	96	24.27	45	1.9e-06
All	Quantile 1	GO:0006635	fatty acid beta-oxidation	664	167.86	219	2.1e-06
All	Quantile 1	GO:0006450	regulation of translational fidelity	62	15.67	37	3.7e-06
All	Quantile 1	GO:0051762	sesquiterpene biosynthetic process	43	10.87	25	4.8e-06
All	Quantile 1	GO:0006626	protein targeting to mitochondrion	415	104.91	151	5.4e-06
All	Quantile 1	GO:0000462	maturation of SSU-rRNA from tricistronic rRNA transcript (SSU-rRNA, 5.8S rRNA, LSU-rRNA)	137	34.63	58	8.8e-06
All	Quantile 1	GO:0009769	photosynthesis, light harvesting in photosystem II	119	30.08	52	9.4e-06
All	Quantile 1	GO:0015991	ATP hydrolysis coupled proton transport	128	32.36	55	9.6e-06
All	Quantile 1	GO:0022904	respiratory electron transport chain	232	58.65	122	9.9e-06
All	Quantile 1	GO:0010564	regulation of cell cycle process	600	151.68	200	2.1e-05
All	Quantile 1	GO:0016579	protein deubiquitination	399	100.87	137	2.2e-05
All	Quantile 1	GO:0006891	intra-Golgi vesicle-mediated transport	269	68	101	2.5e-05
All	Quantile 1	GO:0042254	ribosome biogenesis	1625	410.81	551	2.8e-05
All	Quantile 1	GO:0050821	protein stabilization	65	16.43	32	2.8e-05
All	Quantile 1	GO:0015986	ATP synthesis coupled proton transport	275	69.52	106	2.8e-05
All	Quantile 1	GO:0048578	positive regulation of long-day photoperiodism, flowering	49	12.39	26	2.9e-05
All	Quantile 1	GO:0010048	vernalization response	592	149.66	199	3e-05
All	Quantile 1	GO:0000278	mitotic cell cycle	2162	546.56	601	3.2e-05
All	Quantile 1	GO:0080129	proteasome core complex assembly	477	120.59	160	3.2e-05
All	Quantile 1	GO:0000724	double-strand break repair via homologous recombination	711	179.74	221	3.6e-05
All	Quantile 1	GO:0007052	mitotic spindle organization	63	15.93	21	3.9e-05
All	Quantile 1	GO:2001020	regulation of response to DNA damage stimulus	82	20.73	33	4.2e-05
All	Quantile 1	GO:0007062	sister chromatid cohesion	489	123.62	167	4.5e-05
All	Quantile 1	GO:0000741	karyogamy	789	199.46	160	4.7e-05
All	Quantile 1	GO:0035196	production of miRNAs involved in gene silencing by miRNA	500	126.4	160	5.1e-05
All	Quantile 1	GO:0007131	reciprocal meiotic recombination	529	133.73	167	5.4e-05
All	Quantile 1	GO:0009220	pyrimidine ribonucleotide biosynthetic process	507	128.17	175	5.8e-05
All	Quantile 1	GO:0009814	defense response, incompatible interaction	7882	1992.61	1941	6.7e-05
All	Quantile 1	GO:0016310	phosphorylation	10020	2533.11	2708	7e-05
All	Quantile 1	GO:0009772	photosynthetic electron transport in photosystem II	57	14.41	28	9e-05
All	Quantile 1	GO:0006325	chromatin organization	2663	673.22	810	0.00012
All	Quantile 1	GO:0008299	isoprenoid biosynthetic process	2129	538.22	586	0.00013
All	Quantile 1	GO:0006396	RNA processing	4360	1102.23	1413	0.00013
All	Quantile 1	GO:0032259	methylation	2994	756.9	969	0.00013
All	Quantile 1	GO:0043687	post-translational protein modification	462	116.8	157	0.00014
All	Quantile 1	GO:0045116	protein neddylation	29	7.33	17	0.00014
All	Quantile 1	GO:0010225	response to UV-C	37	9.35	22	0.00016
All	Quantile 1	GO:0006458	'de novo' protein folding	83	20.98	38	0.00017
All	Quantile 1	GO:0006281	DNA repair	2006	507.13	637	0.00019
All	Quantile 1	GO:0006563	L-serine metabolic process	88	22.25	32	0.00021
All	Quantile 1	GO:0048449	floral organ formation	1245	314.74	282	0.00021
All	Quantile 1	GO:0006865	amino acid transport	1495	377.94	363	0.00022
All	Quantile 1	GO:0009630	gravitropism	1244	314.49	361	0.00024
All	Quantile 1	GO:0016106	sesquiterpenoid biosynthetic process	343	86.71	75	0.00026
All	Quantile 1	GO:0000578	embryonic axis specification	684	172.92	125	0.00026
All	Quantile 1	GO:0006465	signal peptide processing	60	15.17	28	0.00027
All	Quantile 1	GO:0048573	photoperiodism, flowering	1132	286.18	343	0.00027
All	Quantile 1	GO:0006446	regulation of translational initiation	135	34.13	57	0.00031
All	Quantile 1	GO:0006499	N-terminal protein myristoylation	355	89.75	119	0.00031
All	Quantile 1	GO:0032456	endocytic recycling	23	5.81	14	0.00032
All	Quantile 1	GO:0009966	regulation of signal transduction	3041	768.78	695	0.00036
All	Quantile 1	GO:0008535	respiratory chain complex IV assembly	65	16.43	30	0.00036
All	Quantile 1	GO:0009660	amyloplast organization	14	3.54	10	0.00038
All	Quantile 1	GO:0008643	carbohydrate transport	630	159.27	155	0.00038
All	Quantile 1	GO:0000085	mitotic G2 phase	131	33.12	51	0.0004
All	Quantile 1	GO:0090213	regulation of radial pattern formation	8	2.02	7	0.00041
All	Quantile 1	GO:0006384	transcription initiation from RNA polymerase III promoter	21	5.31	13	0.00042
All	Quantile 1	GO:0016255	attachment of GPI anchor to protein	21	5.31	13	0.00042
All	Quantile 1	GO:0070814	hydrogen sulfide biosynthetic process	21	5.31	13	0.00042
All	Quantile 1	GO:0070940	dephosphorylation of RNA polymerase II C-terminal domain	21	5.31	13	0.00042
All	Quantile 1	GO:0000460	maturation of 5.8S rRNA	81	20.48	37	0.00043
All	Quantile 1	GO:0006261	DNA-dependent DNA replication	895	226.26	292	0.00045
All	Quantile 1	GO:0006275	regulation of DNA replication	430	108.71	143	0.00045
All	Quantile 1	GO:0000956	nuclear-transcribed mRNA catabolic process	500	126.4	172	0.00047
All	Quantile 1	GO:0043248	proteasome assembly	628	158.76	217	0.00049
All	Quantile 1	GO:0006289	nucleotide-excision repair	138	34.89	51	0.00054
All	Quantile 1	GO:0035269	protein O-linked mannosylation	19	4.8	12	0.00054
All	Quantile 1	GO:0000478	endonucleolytic cleavage involved in rRNA processing	91	23.01	36	0.00054
All	Quantile 1	GO:0044267	cellular protein metabolic process	20848	5270.48	5810	0.00055
All	Quantile 1	GO:0043693	monoterpene biosynthetic process	68	17.19	30	0.00056
All	Quantile 1	GO:0006379	mRNA cleavage	49	12.39	22	0.00057
All	Quantile 1	GO:0006402	mRNA catabolic process	571	144.35	192	0.00058
All	Quantile 1	GO:0010267	production of ta-siRNAs involved in RNA interference	392	99.1	128	0.00063
All	Quantile 1	GO:0006120	mitochondrial electron transport, NADH to ubiquinone	54	13.65	25	0.00066
All	Quantile 1	GO:0032204	regulation of telomere maintenance	175	44.24	66	0.00066
All	Quantile 1	GO:0045903	positive regulation of translational fidelity	17	4.3	11	0.00069
All	Quantile 1	GO:0051014	actin filament severing	17	4.3	11	0.00069
All	Quantile 1	GO:0010228	vegetative to reproductive phase transition of meristem	2198	555.67	658	0.00069
All	Quantile 1	GO:0042732	D-xylose metabolic process	118	29.83	46	0.00072
All	Quantile 1	GO:0061136	regulation of proteasomal protein catabolic process	212	53.59	74	0.00074
All	Quantile 1	GO:0016926	protein desumoylation	304	76.85	102	0.00076
All	Quantile 1	GO:0005980	glycogen catabolic process	30	7.58	17	0.00076
All	Quantile 1	GO:0046168	glycerol-3-phosphate catabolic process	15	3.79	10	0.00087
All	Quantile 1	GO:0019745	pentacyclic triterpenoid biosynthetic process	135	34.13	51	0.0009
All	Quantile 1	GO:0016571	histone methylation	1105	279.35	329	0.00092
All	Quantile 1	GO:0007033	vacuole organization	354	89.49	119	0.00098
All	Quantile 1	GO:0006122	mitochondrial electron transport, ubiquinol to cytochrome c	41	10.37	20	0.00099
All	Quantile 1	GO:0010072	primary shoot apical meristem specification	155	39.18	57	0.001
All	Quantile 1	GO:0006650	glycerophospholipid metabolic process	963	243.45	304	0.00102
All	Quantile 1	GO:0000470	maturation of LSU-rRNA	58	14.66	25	0.00104
All	Quantile 1	GO:0006312	mitotic recombination	235	59.41	82	0.00106
All	Quantile 1	GO:0048193	Golgi vesicle transport	1308	330.67	401	0.00107
All	Quantile 1	GO:0031627	telomeric loop formation	44	11.12	21	0.00107
All	Quantile 1	GO:0045899	positive regulation of RNA polymerase II transcriptional preinitiation complex assembly	44	11.12	21	0.00107
All	Quantile 1	GO:0006419	alanyl-tRNA aminoacylation	24	6.07	13	0.00108
All	Quantile 1	GO:0006306	DNA methylation	681	172.16	214	0.00118
All	Quantile 1	GO:0042026	protein refolding	89	22.5	36	0.0012
All	Quantile 1	GO:0019252	starch biosynthetic process	737	186.32	221	0.00122
All	Quantile 1	GO:0030422	production of siRNA involved in RNA interference	523	132.22	178	0.00124
All	Quantile 1	GO:0009933	meristem structural organization	1751	442.66	402	0.00129
All	Quantile 1	GO:0006896	Golgi to vacuole transport	68	17.19	29	0.00132
All	Quantile 1	GO:0008380	RNA splicing	1453	367.33	503	0.00138
All	Quantile 1	GO:0051567	histone H3-K9 methylation	670	169.38	196	0.00139
All	Quantile 1	GO:0006952	defense response	19730	4987.84	4769	0.00139
All	Quantile 1	GO:0034243	regulation of transcription elongation from RNA polymerase II promoter	48	12.13	23	0.00143
All	Quantile 1	GO:0006907	pinocytosis	7	1.77	6	0.00143
All	Quantile 1	GO:0042776	mitochondrial ATP synthesis coupled proton transport	7	1.77	6	0.00143
All	Quantile 1	GO:0051974	negative regulation of telomerase activity	7	1.77	6	0.00143
All	Quantile 1	GO:0006488	dolichol-linked oligosaccharide biosynthetic process	12	3.03	9	0.00144
All	Quantile 1	GO:0006428	isoleucyl-tRNA aminoacylation	9	2.28	7	0.00144
All	Quantile 1	GO:0051726	regulation of cell cycle	1308	330.67	400	0.00151
All	Quantile 1	GO:0016226	iron-sulfur cluster assembly	343	86.71	112	0.00152
All	Quantile 1	GO:0006270	DNA replication initiation	234	59.16	81	0.00153
All	Quantile 1	GO:0006301	postreplication repair	211	53.34	77	0.00154
All	Quantile 1	GO:0006906	vesicle fusion	142	35.9	59	0.00155
All	Quantile 1	GO:0061077	chaperone-mediated protein folding	184	46.52	69	0.00156
All	Quantile 1	GO:0016558	protein import into peroxisome matrix	302	76.35	99	0.0016
All	Quantile 1	GO:0000911	cytokinesis by cell plate formation	1068	270	267	0.00162
All	Quantile 1	GO:0000023	maltose metabolic process	531	134.24	165	0.00163
All	Quantile 1	GO:0042147	retrograde transport, endosome to Golgi	63	15.93	27	0.00174
All	Quantile 1	GO:0000027	ribosomal large subunit assembly	97	24.52	38	0.00179
All	Quantile 1	GO:0000160	phosphorelay signal transduction system	1884	476.28	448	0.00195
All	Quantile 1	GO:0009793	embryo development ending in seed dormancy	4164	1052.68	1061	0.00213
All	Quantile 1	GO:0033523	histone H2B ubiquitination	24	6.07	13	0.00233
All	Quantile 1	GO:0051604	protein maturation	577	145.87	184	0.00269
All	Quantile 1	GO:0051781	positive regulation of cell division	35	8.85	17	0.00274
All	Quantile 1	GO:1901800	positive regulation of proteasomal protein catabolic process	124	31.35	36	0.0028
All	Quantile 1	GO:0030488	tRNA methylation	77	19.47	34	0.00297
All	Quantile 1	GO:0002943	tRNA dihydrouridine synthesis	12	3.03	8	0.003
All	Quantile 1	GO:0000466	maturation of 5.8S rRNA from tricistronic rRNA transcript (SSU-rRNA, 5.8S rRNA, LSU-rRNA)	69	17.44	28	0.00317
All	Quantile 1	GO:0042549	photosystem II stabilization	33	8.34	16	0.00337
All	Quantile 1	GO:0019288	isopentenyl diphosphate biosynthetic process, methylerythritol 4-phosphate pathway	831	210.08	244	0.00346
All	Quantile 1	GO:0009086	methionine biosynthetic process	448	113.26	140	0.00347
All	Quantile 1	GO:0070681	glutaminyl-tRNAGln biosynthesis via transamidation	10	2.53	7	0.00375
All	Quantile 1	GO:0006360	transcription by RNA polymerase I	51	12.89	22	0.00391
All	Quantile 1	GO:0048034	heme O biosynthetic process	4	1.01	4	0.00408
All	Quantile 1	GO:0006621	protein retention in ER lumen	20	5.06	11	0.00432
All	Quantile 1	GO:0016570	histone modification	1522	384.77	479	0.0044
All	Quantile 1	GO:0019348	dolichol metabolic process	53	13.4	19	0.00454
All	Quantile 1	GO:0006436	tryptophanyl-tRNA aminoacylation	15	3.79	9	0.00454
All	Quantile 1	GO:0006850	mitochondrial pyruvate transmembrane transport	15	3.79	9	0.00454
All	Quantile 1	GO:0010270	photosystem II oxygen evolving complex assembly	15	3.79	9	0.00454
All	Quantile 1	GO:0006886	intracellular protein transport	4274	1080.49	1272	0.00471
All	Quantile 1	GO:0009910	negative regulation of flower development	168	42.47	58	0.00472
All	Quantile 1	GO:0045017	glycerolipid biosynthetic process	833	210.59	296	0.0048
All	Quantile 1	GO:0006475	internal protein amino acid acetylation	208	52.58	68	0.00488
All	Quantile 1	GO:0070816	phosphorylation of RNA polymerase II C-terminal domain	31	7.84	16	0.00488
All	Quantile 1	GO:0001778	plasma membrane repair	6	1.52	5	0.00489
All	Quantile 1	GO:0017186	peptidyl-pyroglutamic acid biosynthetic process, using glutaminyl-peptide cyclotransferase	6	1.52	5	0.00489
All	Quantile 1	GO:0017198	N-terminal peptidyl-serine acetylation	6	1.52	5	0.00489
All	Quantile 1	GO:0018002	N-terminal peptidyl-glutamic acid acetylation	6	1.52	5	0.00489
All	Quantile 1	GO:0032049	cardiolipin biosynthetic process	6	1.52	5	0.00489
All	Quantile 1	GO:0042819	vitamin B6 biosynthetic process	44	11.12	13	0.00489
All	Quantile 1	GO:0010332	response to gamma radiation	417	105.42	129	0.00517
All	Quantile 1	GO:0016055	Wnt signaling pathway	52	13.15	22	0.0054
All	Quantile 1	GO:0090116	C-5 methylation of cytosine	46	11.63	20	0.00542
All	Quantile 1	GO:1901135	carbohydrate derivative metabolic process	8005	2023.7	2170	0.00558
All	Quantile 1	GO:0006260	DNA replication	1115	281.88	368	0.00563
All	Quantile 1	GO:0006221	pyrimidine nucleotide biosynthetic process	612	154.72	204	0.00566
All	Quantile 1	GO:0007264	small GTPase mediated signal transduction	401	101.37	124	0.0058
All	Quantile 1	GO:0010390	histone monoubiquitination	13	3.29	8	0.00608
All	Quantile 1	GO:0048505	regulation of timing of cell differentiation	13	3.29	8	0.00608
All	Quantile 1	GO:0070291	N-acylethanolamine metabolic process	13	3.29	8	0.00608
All	Quantile 1	GO:0006364	rRNA processing	1185	299.57	389	0.00611
All	Quantile 1	GO:0006338	chromatin remodeling	202	51.07	72	0.00611
All	Quantile 1	GO:0046621	negative regulation of organ growth	29	7.33	14	0.00627
All	Quantile 1	GO:0019432	triglyceride biosynthetic process	116	29.33	43	0.00646
All	Quantile 1	GO:0080036	regulation of cytokinin-activated signaling pathway	52	13.15	21	0.00665
All	Quantile 1	GO:0009098	leucine biosynthetic process	32	8.09	15	0.00665
All	Quantile 1	GO:0009072	aromatic amino acid family metabolic process	1983	501.31	427	0.00687
All	Quantile 1	GO:0006511	ubiquitin-dependent protein catabolic process	3354	847.91	889	0.00691
All	Quantile 1	GO:0034314	Arp2/3 complex-mediated actin nucleation	38	9.61	17	0.0071
All	Quantile 1	GO:0031047	gene silencing by RNA	1268	320.56	396	0.00712
All	Quantile 1	GO:0051321	meiotic cell cycle	1703	430.53	451	0.00717
All	Quantile 1	GO:0031098	stress-activated protein kinase signaling cascade	115	29.07	30	0.00719
All	Quantile 1	GO:0007165	signal transduction	14964	3782.97	3491	0.00739
All	Quantile 1	GO:0071805	potassium ion transmembrane transport	489	123.62	135	0.00751
All	Quantile 1	GO:0010074	maintenance of meristem identity	271	68.51	76	0.00753
All	Quantile 1	GO:0007034	vacuolar transport	718	181.51	248	0.00754
All	Quantile 1	GO:0052543	callose deposition in cell wall	1730	437.35	326	0.00763
All	Quantile 1	GO:0015721	bile acid and bile salt transport	11	2.78	7	0.00807
All	Quantile 1	GO:0050665	hydrogen peroxide biosynthetic process	308	77.86	97	0.00818
All	Quantile 1	GO:0030433	ubiquitin-dependent ERAD pathway	117	29.58	43	0.0085
All	Quantile 1	GO:0006346	methylation-dependent chromatin silencing	445	112.5	136	0.00881
All	Quantile 1	GO:0016573	histone acetylation	202	51.07	63	0.00895
All	Quantile 1	GO:0010100	negative regulation of photomorphogenesis	76	19.21	29	0.00896
All	Quantile 1	GO:0009652	thigmotropism	30	7.58	14	0.00906
All	Quantile 1	GO:0042138	meiotic DNA double-strand break formation	292	73.82	92	0.00966
All	Quantile 1	GO:0045787	positive regulation of cell cycle	152	38.43	48	0.00966
All	Quantile 1	GO:0018344	protein geranylgeranylation	19	4.8	10	0.00966
All	Quantile 1	GO:0000266	mitochondrial fission	45	11.38	19	0.00967
All	Quantile 1	GO:0000002	mitochondrial genome maintenance	23	5.81	12	0.01058
All	Quantile 1	GO:0019628	urate catabolic process	9	2.28	6	0.01059
All	Quantile 1	GO:0043987	histone H3-S10 phosphorylation	9	2.28	6	0.01059
All	Quantile 1	GO:1990067	intrachromosomal DNA recombination	9	2.28	6	0.01059
All	Quantile 1	GO:0006144	purine nucleobase metabolic process	86	21.74	15	0.01061
All	Quantile 1	GO:0034976	response to endoplasmic reticulum stress	2677	676.76	697	0.01079
All	Quantile 1	GO:0016192	vesicle-mediated transport	3081	778.89	854	0.01089
All	Quantile 1	GO:0006096	glycolytic process	989	250.02	282	0.01094
All	Quantile 1	GO:0045047	protein targeting to ER	98	24.77	41	0.01102
All	Quantile 1	GO:0000413	protein peptidyl-prolyl isomerization	173	43.74	57	0.01104
All	Quantile 1	GO:0010220	positive regulation of vernalization response	14	3.54	8	0.01106
All	Quantile 1	GO:0006544	glycine metabolic process	261	65.98	70	0.01106
All	Quantile 1	GO:0007018	microtubule-based movement	212	53.59	69	0.01111
All	Quantile 1	GO:0010351	lithium ion transport	123	31.1	44	0.01122
All	Quantile 1	GO:0010182	sugar mediated signaling pathway	504	127.41	151	0.01126
All	Quantile 1	GO:0009311	oligosaccharide metabolic process	1034	261.4	292	0.01162
All	Quantile 1	GO:0046713	borate transport	337	85.2	102	0.0118
All	Quantile 1	GO:0006614	SRP-dependent cotranslational protein targeting to membrane	69	17.44	26	0.01228
All	Quantile 1	GO:0016032	viral process	368	93.03	117	0.01233
All	Quantile 1	GO:0048280	vesicle fusion with Golgi apparatus	28	7.08	13	0.01236
All	Quantile 1	GO:0010090	trichome morphogenesis	637	161.04	183	0.01237
All	Quantile 1	GO:0008654	phospholipid biosynthetic process	1499	378.95	475	0.01242
All	Quantile 1	GO:0001676	long-chain fatty acid metabolic process	118	29.83	40	0.0125
All	Quantile 1	GO:0008610	lipid biosynthetic process	5578	1410.15	1443	0.0126
All	Quantile 1	GO:0000303	response to superoxide	220	55.62	71	0.01326
All	Quantile 1	GO:0000395	mRNA 5'-splice site recognition	7	1.77	5	0.01353
All	Quantile 1	GO:0006897	endocytosis	955	241.43	212	0.01366
All	Quantile 1	GO:0044283	small molecule biosynthetic process	7776	1965.81	1884	0.0138
All	Quantile 1	GO:0009616	virus induced gene silencing	654	165.33	186	0.01397
All	Quantile 1	GO:0051510	regulation of unidimensional cell growth	700	176.96	159	0.01437
All	Quantile 1	GO:0043247	telomere maintenance in response to DNA damage	294	74.32	90	0.01445
All	Quantile 1	GO:1903825	organic acid transmembrane transport	471	119.07	91	0.01517
All	Quantile 1	GO:0009231	riboflavin biosynthetic process	53	13.4	21	0.01519
All	Quantile 1	GO:0006655	phosphatidylglycerol biosynthetic process	243	61.43	80	0.01602
All	Quantile 1	GO:0045595	regulation of cell differentiation	730	184.55	166	0.01603
All	Quantile 1	GO:0006665	sphingolipid metabolic process	313	79.13	102	0.01605
All	Quantile 1	GO:0031123	RNA 3'-end processing	200	50.56	71	0.01611
All	Quantile 1	GO:1902749	regulation of cell cycle G2/M phase transition	224	56.63	75	0.01612
All	Quantile 1	GO:0006123	mitochondrial electron transport, cytochrome c to oxygen	23	5.81	11	0.01615
All	Quantile 1	GO:0045038	protein import into chloroplast thylakoid membrane	23	5.81	11	0.01615
All	Quantile 1	GO:0000965	mitochondrial RNA 3'-end processing	6	1.52	6	0.01615
All	Quantile 1	GO:0006266	DNA ligation	20	5.06	8	0.01615
All	Quantile 1	GO:0071569	protein ufmylation	6	1.52	4	0.01615
All	Quantile 1	GO:0034724	DNA replication-independent nucleosome organization	14	3.54	6	0.01615
All	Quantile 1	GO:0000056	ribosomal small subunit export from nucleus	3	0.76	3	0.01616
All	Quantile 1	GO:0001700	embryonic development via the syncytial blastoderm	3	0.76	3	0.01616
All	Quantile 1	GO:0006481	C-terminal protein methylation	3	0.76	3	0.01616
All	Quantile 1	GO:0010350	cellular response to magnesium starvation	3	0.76	3	0.01616
All	Quantile 1	GO:0010867	positive regulation of triglyceride biosynthetic process	3	0.76	3	0.01616
All	Quantile 1	GO:0015782	CMP-N-acetylneuraminate transmembrane transport	3	0.76	3	0.01616
All	Quantile 1	GO:0016031	tRNA import into mitochondrion	3	0.76	3	0.01616
All	Quantile 1	GO:0019516	lactate oxidation	3	0.76	3	0.01616
All	Quantile 1	GO:0019805	quinolinate biosynthetic process	3	0.76	3	0.01616
All	Quantile 1	GO:0032211	negative regulation of telomere maintenance via telomerase	3	0.76	3	0.01616
All	Quantile 1	GO:0034197	triglyceride transport	3	0.76	3	0.01616
All	Quantile 1	GO:0034501	protein localization to kinetochore	3	0.76	3	0.01616
All	Quantile 1	GO:0036066	protein O-linked fucosylation	3	0.76	3	0.01616
All	Quantile 1	GO:0042777	plasma membrane ATP synthesis coupled proton transport	3	0.76	3	0.01616
All	Quantile 1	GO:0043419	urea catabolic process	3	0.76	3	0.01616
All	Quantile 1	GO:0043968	histone H2A acetylation	3	0.76	3	0.01616
All	Quantile 1	GO:0043971	histone H3-K18 acetylation	3	0.76	3	0.01616
All	Quantile 1	GO:0043972	histone H3-K23 acetylation	3	0.76	3	0.01616
All	Quantile 1	GO:0044154	histone H3-K14 acetylation	3	0.76	3	0.01616
All	Quantile 1	GO:0045697	regulation of synergid differentiation	3	0.76	3	0.01616
All	Quantile 1	GO:0046104	thymidine metabolic process	3	0.76	3	0.01616
All	Quantile 1	GO:0046294	formaldehyde catabolic process	3	0.76	3	0.01616
All	Quantile 1	GO:0048488	synaptic vesicle endocytosis	3	0.76	3	0.01616
All	Quantile 1	GO:0051391	tRNA acetylation	3	0.76	3	0.01616
All	Quantile 1	GO:0097222	mitochondrial mRNA polyadenylation	3	0.76	3	0.01616
All	Quantile 1	GO:1901969	positive regulation of polynucleotide 3'-phosphatase activity	3	0.76	3	0.01616
All	Quantile 1	GO:1901972	positive regulation of DNA-5-methylcytosine glycosylase activity	3	0.76	3	0.01616
All	Quantile 1	GO:0006482	protein demethylation	45	11.38	13	0.01616
All	Quantile 1	GO:0051347	positive regulation of transferase activity	281	71.04	68	0.01617
All	Quantile 1	GO:0010603	regulation of cytoplasmic mRNA processing body assembly	7	1.77	5	0.01629
All	Quantile 1	GO:0034063	stress granule assembly	5	1.26	4	0.01629
All	Quantile 1	GO:0034628	'de novo' NAD biosynthetic process from aspartate	5	1.26	4	0.01629
All	Quantile 1	GO:0055091	phospholipid homeostasis	5	1.26	4	0.01629
All	Quantile 1	GO:0055121	response to high fluence blue light stimulus by blue high-fluence system	5	1.26	4	0.01629
All	Quantile 1	GO:0070328	triglyceride homeostasis	5	1.26	4	0.01629
All	Quantile 1	GO:0006302	double-strand break repair	941	237.89	293	0.01652
All	Quantile 1	GO:0000188	inactivation of MAPK activity	44	11.12	18	0.01661
All	Quantile 1	GO:0043207	response to external biotic stimulus	16721	4227.15	4029	0.01673
All	Quantile 1	GO:0044375	regulation of peroxisome size	26	6.57	12	0.01688
All	Quantile 1	GO:0032968	positive regulation of transcription elongation from RNA polymerase II promoter	41	10.37	17	0.01698
All	Quantile 1	GO:0006183	GTP biosynthetic process	29	7.33	13	0.0173
All	Quantile 1	GO:0007276	gamete generation	1348	340.78	358	0.0182
All	Quantile 1	GO:0010389	regulation of G2/M transition of mitotic cell cycle	221	55.87	72	0.01829
All	Quantile 1	GO:0010506	regulation of autophagy	108	27.3	32	0.0185
All	Quantile 1	GO:0006424	glutamyl-tRNA aminoacylation	15	3.79	8	0.0185
All	Quantile 1	GO:0034402	recruitment of 3'-end processing factors to RNA polymerase II holoenzyme complex	15	3.79	8	0.0185
All	Quantile 1	GO:0071494	cellular response to UV-C	15	3.79	8	0.0185
All	Quantile 1	GO:0006007	glucose catabolic process	335	84.69	102	0.01852
All	Quantile 1	GO:0006359	regulation of transcription by RNA polymerase III	92	23.26	33	0.01942
All	Quantile 1	GO:0019915	lipid storage	372	94.04	112	0.01982
All	Quantile 1	GO:0009236	cobalamin biosynthetic process	18	4.55	9	0.02078
All	Quantile 1	GO:0015739	sialic acid transport	18	4.55	9	0.02078
All	Quantile 1	GO:1990937	xylan acetylation	18	4.55	9	0.02078
All	Quantile 1	GO:2000114	regulation of establishment of cell polarity	18	4.55	9	0.02078
All	Quantile 1	GO:0006013	mannose metabolic process	18	4.55	11	0.02082
All	Quantile 1	GO:0019941	modification-dependent protein catabolic process	3421	864.85	916	0.02104
All	Quantile 1	GO:0080027	response to herbivore	215	54.35	68	0.02124
All	Quantile 1	GO:0006298	mismatch repair	77	19.47	26	0.02127
All	Quantile 1	GO:0031507	heterochromatin assembly	61	15.42	23	0.02157
All	Quantile 1	GO:0033365	protein localization to organelle	2032	513.7	721	0.02181
All	Quantile 1	GO:0042023	DNA endoreduplication	359	90.76	110	0.02185
All	Quantile 1	GO:0000245	spliceosomal complex assembly	74	18.71	32	0.02187
All	Quantile 1	GO:0007010	cytoskeleton organization	2611	660.07	651	0.02219
All	Quantile 1	GO:0046443	FAD metabolic process	21	5.31	10	0.02226
All	Quantile 1	GO:0090503	RNA phosphodiester bond hydrolysis, exonucleolytic	75	18.96	28	0.02257
All	Quantile 1	GO:0006995	cellular response to nitrogen starvation	605	152.95	175	0.02266
All	Quantile 1	GO:0048638	regulation of developmental growth	2763	698.5	601	0.02303
All	Quantile 1	GO:0009558	embryo sac cellularization	24	6.07	11	0.02312
All	Quantile 1	GO:0010587	miRNA catabolic process	27	6.83	12	0.02353
All	Quantile 1	GO:0019932	second-messenger-mediated signaling	384	97.08	112	0.02355
All	Quantile 1	GO:0016575	histone deacetylation	80	20.22	30	0.02362
All	Quantile 1	GO:0006094	gluconeogenesis	658	166.35	189	0.02414
All	Quantile 1	GO:0051016	barbed-end actin filament capping	52	13.15	20	0.02472
All	Quantile 1	GO:0015886	heme transport	65	16.43	24	0.02497
All	Quantile 1	GO:0048278	vesicle docking	176	44.49	45	0.02637
All	Quantile 1	GO:0009610	response to symbiotic fungus	344	86.96	103	0.02677
All	Quantile 1	GO:0051085	chaperone cofactor-dependent protein refolding	46	11.63	18	0.02688
All	Quantile 1	GO:0009640	photomorphogenesis	1877	474.51	503	0.02788
All	Quantile 1	GO:0006352	DNA-templated transcription, initiation	337	85.2	126	0.02812
All	Quantile 1	GO:0031048	chromatin silencing by small RNA	415	104.91	121	0.02817
All	Quantile 1	GO:0019307	mannose biosynthetic process	8	2.02	5	0.02861
All	Quantile 1	GO:0031063	regulation of histone deacetylation	8	2.02	5	0.02861
All	Quantile 1	GO:0019478	D-amino acid catabolic process	16	4.04	7	0.02861
All	Quantile 1	GO:0006888	ER to Golgi vesicle-mediated transport	469	118.57	138	0.02882
All	Quantile 1	GO:0000154	rRNA modification	112	28.31	44	0.02883
All	Quantile 1	GO:0000055	ribosomal large subunit export from nucleus	16	4.04	8	0.02893
All	Quantile 1	GO:0009856	pollination	3539	894.68	727	0.02915
All	Quantile 1	GO:0016572	histone phosphorylation	220	55.62	72	0.0304
All	Quantile 1	GO:0045324	late endosome to vacuole transport	50	12.64	21	0.03072
All	Quantile 1	GO:0042148	strand invasion	34	8.6	14	0.03076
All	Quantile 1	GO:0006696	ergosterol biosynthetic process	19	4.8	9	0.03079
All	Quantile 1	GO:1902000	homogentisate catabolic process	19	4.8	9	0.03079
All	Quantile 1	GO:0009861	jasmonic acid and ethylene-dependent systemic resistance	283	71.54	78	0.03094
All	Quantile 1	GO:0043967	histone H4 acetylation	53	13.4	19	0.03173
All	Quantile 1	GO:0070676	intralumenal vesicle formation	22	5.56	10	0.03174
All	Quantile 1	GO:0006383	transcription by RNA polymerase III	160	40.45	63	0.03175
All	Quantile 1	GO:0043087	regulation of GTPase activity	246	62.19	66	0.03188
All	Quantile 1	GO:0006344	maintenance of chromatin silencing	28	7.08	12	0.03191
All	Quantile 1	GO:0035999	tetrahydrofolate interconversion	28	7.08	12	0.03191
All	Quantile 1	GO:0045039	protein import into mitochondrial inner membrane	25	6.32	11	0.03206
All	Quantile 1	GO:1901409	positive regulation of phosphorylation of RNA polymerase II C-terminal domain	25	6.32	11	0.03206
All	Quantile 1	GO:0009658	chloroplast organization	1006	254.32	273	0.03245
All	Quantile 1	GO:0030243	cellulose metabolic process	1304	329.66	257	0.03482
All	Quantile 1	GO:0006268	DNA unwinding involved in DNA replication	44	11.12	17	0.03507
All	Quantile 1	GO:0010440	stomatal lineage progression	198	50.06	58	0.03582
All	Quantile 1	GO:0006397	mRNA processing	1628	411.57	500	0.03607
All	Quantile 1	GO:1904159	megasporocyte differentiation	11	2.78	6	0.03615
All	Quantile 1	GO:1904667	negative regulation of ubiquitin protein ligase activity	11	2.78	6	0.03615
All	Quantile 1	GO:0060211	regulation of nuclear-transcribed mRNA poly(A) tail shortening	19	4.8	8	0.03615
All	Quantile 1	GO:0051301	cell division	3141	794.06	762	0.03653
All	Quantile 1	GO:0000387	spliceosomal snRNP assembly	61	15.42	24	0.03658
All	Quantile 1	GO:0016197	endosomal transport	192	48.54	78	0.03668
All	Quantile 1	GO:0071806	protein transmembrane transport	620	156.74	206	0.03718
All	Quantile 1	GO:0006414	translational elongation	235	59.41	74	0.03832
All	Quantile 1	GO:0070925	organelle assembly	537	135.76	185	0.03879
All	Quantile 1	GO:0007166	cell surface receptor signaling pathway	2469	624.18	532	0.03897
All	Quantile 1	GO:0018345	protein palmitoylation	72	18.2	24	0.03907
All	Quantile 1	GO:0031456	glycine betaine biosynthetic process	15	3.79	9	0.03907
All	Quantile 1	GO:0046838	phosphorylated carbohydrate dephosphorylation	96	24.27	28	0.03908
All	Quantile 1	GO:0045048	protein insertion into ER membrane	9	2.28	6	0.03908
All	Quantile 1	GO:0070206	protein trimerization	18	4.55	8	0.03908
All	Quantile 1	GO:0070734	histone H3-K27 methylation	27	6.83	10	0.03909
All	Quantile 1	GO:0000183	chromatin silencing at rDNA	6	1.52	4	0.03909
All	Quantile 1	GO:0019358	nicotinate nucleotide salvage	6	1.52	4	0.03909
All	Quantile 1	GO:0031567	mitotic cell size control checkpoint	6	1.52	4	0.03909
All	Quantile 1	GO:0034337	RNA folding	6	1.52	4	0.03909
All	Quantile 1	GO:0042352	GDP-L-fucose salvage	6	1.52	4	0.03909
All	Quantile 1	GO:0043988	histone H3-S28 phosphorylation	6	1.52	4	0.03909
All	Quantile 1	GO:0045900	negative regulation of translational elongation	6	1.52	4	0.03909
All	Quantile 1	GO:0070478	nuclear-transcribed mRNA catabolic process, 3'-5' exonucleolytic nonsense-mediated decay	6	1.52	4	0.03909
All	Quantile 1	GO:0080056	petal vascular tissue pattern formation	6	1.52	4	0.03909
All	Quantile 1	GO:0080057	sepal vascular tissue pattern formation	6	1.52	4	0.03909
All	Quantile 1	GO:0080164	regulation of nitric oxide metabolic process	6	1.52	4	0.03909
All	Quantile 1	GO:0090153	regulation of sphingolipid biosynthetic process	6	1.52	4	0.03909
All	Quantile 1	GO:1902458	positive regulation of stomatal opening	6	1.52	4	0.03909
All	Quantile 1	GO:0019566	arabinose metabolic process	43	10.87	13	0.03909
All	Quantile 1	GO:0070601	centromeric sister chromatid cohesion	14	3.54	5	0.0391
All	Quantile 1	GO:0030705	cytoskeleton-dependent intracellular transport	21	5.31	6	0.0391
All	Quantile 1	GO:0015846	polyamine transport	30	7.58	7	0.03911
All	Quantile 1	GO:0015693	magnesium ion transport	60	15.17	23	0.03919
All	Quantile 1	GO:0080155	regulation of double fertilization forming a zygote and endosperm	51	12.89	19	0.03922
All	Quantile 1	GO:2000029	regulation of proanthocyanidin biosynthetic process	51	12.89	19	0.03922
All	Quantile 1	GO:0043161	proteasome-mediated ubiquitin-dependent protein catabolic process	1735	438.62	432	0.04007
All	Quantile 1	GO:0046835	carbohydrate phosphorylation	112	28.31	37	0.04023
All	Quantile 1	GO:0009615	response to virus	2235	565.02	563	0.04036
All	Quantile 1	GO:0048825	cotyledon development	444	112.25	118	0.04085
All	Quantile 1	GO:0002098	tRNA wobble uridine modification	41	10.37	15	0.04102
All	Quantile 1	GO:0006417	regulation of translation	746	188.59	237	0.04148
All	Quantile 1	GO:0010638	positive regulation of organelle organization	670	169.38	187	0.04158
All	Quantile 1	GO:0009773	photosynthetic electron transport in photosystem I	165	41.71	52	0.04198
All	Quantile 1	GO:0007021	tubulin complex assembly	29	7.33	12	0.04223
All	Quantile 1	GO:0006303	double-strand break repair via nonhomologous end joining	58	14.66	21	0.04251
All	Quantile 1	GO:0006165	nucleoside diphosphate phosphorylation	1015	256.6	293	0.04274
All	Quantile 1	GO:0050792	regulation of viral process	22	5.56	11	0.04276
All	Quantile 1	GO:0031125	rRNA 3'-end processing	50	12.64	17	0.04277
All	Quantile 1	GO:0000973	posttranscriptional tethering of RNA polymerase II gene DNA at nuclear periphery	17	4.3	8	0.04278
All	Quantile 1	GO:0006429	leucyl-tRNA aminoacylation	17	4.3	8	0.04278
All	Quantile 1	GO:0009939	positive regulation of gibberellic acid mediated signaling pathway	17	4.3	8	0.04278
All	Quantile 1	GO:0043981	histone H4-K5 acetylation	17	4.3	8	0.04278
All	Quantile 1	GO:0046938	phytochelatin biosynthetic process	17	4.3	8	0.04278
All	Quantile 1	GO:0046939	nucleotide phosphorylation	1060	267.97	310	0.04279
All	Quantile 1	GO:0002181	cytoplasmic translation	195	49.3	63	0.04286
All	Quantile 1	GO:0006241	CTP biosynthetic process	56	14.16	23	0.04312
All	Quantile 1	GO:0046513	ceramide biosynthetic process	29	7.33	12	0.04318
All	Quantile 1	GO:0006048	UDP-N-acetylglucosamine biosynthetic process	26	6.57	11	0.04318
All	Quantile 1	GO:0006228	UTP biosynthetic process	26	6.57	11	0.04318
All	Quantile 1	GO:0051764	actin crosslink formation	26	6.57	11	0.04318
All	Quantile 1	GO:0015031	protein transport	5098	1288.8	1503	0.04325
All	Quantile 1	GO:0006535	cysteine biosynthetic process from serine	45	11.38	17	0.04344
All	Quantile 1	GO:0042593	glucose homeostasis	106	26.8	38	0.04362
All	Quantile 1	GO:0061025	membrane fusion	1018	257.36	304	0.04373
All	Quantile 1	GO:0008612	peptidyl-lysine modification to peptidyl-hypusine	23	5.81	10	0.04374
All	Quantile 1	GO:0045948	positive regulation of translational initiation	23	5.81	10	0.04374
All	Quantile 1	GO:0071554	cell wall organization or biogenesis	6411	1620.73	1249	0.04459
All	Quantile 1	GO:0008360	regulation of cell shape	99	25.03	33	0.04484
All	Quantile 1	GO:0009970	cellular response to sulfate starvation	99	25.03	33	0.04484
All	Quantile 1	GO:0000122	negative regulation of transcription by RNA polymerase II	65	16.43	23	0.04511
All	Quantile 1	GO:0006075	(1->3)-beta-D-glucan biosynthetic process	42	10.62	16	0.04566
All	Quantile 1	GO:0043622	cortical microtubule organization	166	41.97	52	0.04649
All	Quantile 1	GO:0009880	embryonic pattern specification	804	203.26	164	0.04724
All	Quantile 1	GO:0023014	signal transduction by protein phosphorylation	1419	358.73	376	0.04735
All	Quantile 1	GO:2000024	regulation of leaf development	265	66.99	62	0.04884
A	Quantile 1	GO:0006354	DNA-templated transcription, elongation	155	39.33	85	4.3e-18
A	Quantile 1	GO:0006412	translation	1119	283.94	386	2.8e-07
A	Quantile 1	GO:0006091	generation of precursor metabolites and energy	1070	271.5	324	6.5e-07
A	Quantile 1	GO:0006406	mRNA export from nucleus	98	24.87	44	6.1e-06
A	Quantile 1	GO:0006261	DNA-dependent DNA replication	300	76.12	119	2.7e-05
A	Quantile 1	GO:0051567	histone H3-K9 methylation	219	55.57	80	3e-05
A	Quantile 1	GO:0032259	methylation	990	251.2	351	5.9e-05
A	Quantile 1	GO:0007052	mitotic spindle organization	23	5.84	9	6.8e-05
A	Quantile 1	GO:0006275	regulation of DNA replication	143	36.28	62	0.00012
A	Quantile 1	GO:0001510	RNA methylation	251	63.69	95	0.00016
A	Quantile 1	GO:0048193	Golgi vesicle transport	443	112.41	156	0.00016
A	Quantile 1	GO:0007129	synapsis	109	27.66	45	0.0002
A	Quantile 1	GO:0000028	ribosomal small subunit assembly	22	5.58	15	0.00021
A	Quantile 1	GO:0007276	gamete generation	420	106.57	121	0.00026
A	Quantile 1	GO:0042254	ribosome biogenesis	548	139.05	190	0.00031
A	Quantile 1	GO:0006306	DNA methylation	224	56.84	81	0.00032
A	Quantile 1	GO:0006623	protein targeting to vacuole	171	43.39	65	0.0004
A	Quantile 1	GO:0000724	double-strand break repair via homologous recombination	219	55.57	76	0.00044
A	Quantile 1	GO:0042773	ATP synthesis coupled electron transport	65	16.49	30	0.00061
A	Quantile 1	GO:0008643	carbohydrate transport	207	52.52	61	0.00083
A	Quantile 1	GO:0006606	protein import into nucleus	146	37.05	54	0.00088
A	Quantile 1	GO:0019684	photosynthesis, light reaction	401	101.75	132	0.00096
A	Quantile 1	GO:0000278	mitotic cell cycle	714	181.17	212	0.00136
A	Quantile 1	GO:0006646	phosphatidylethanolamine biosynthetic process	7	1.78	6	0.00146
A	Quantile 1	GO:0070940	dephosphorylation of RNA polymerase II C-terminal domain	7	1.78	6	0.00146
A	Quantile 1	GO:0050790	regulation of catalytic activity	807	204.77	211	0.00161
A	Quantile 1	GO:0009560	embryo sac egg cell differentiation	148	37.55	55	0.00183
A	Quantile 1	GO:0009561	megagametogenesis	498	126.36	149	0.00188
A	Quantile 1	GO:0006891	intra-Golgi vesicle-mediated transport	92	23.34	38	0.00213
A	Quantile 1	GO:0000085	mitotic G2 phase	46	11.67	21	0.00225
A	Quantile 1	GO:0007033	vacuole organization	124	31.46	49	0.00257
A	Quantile 1	GO:0006465	signal peptide processing	19	4.82	11	0.00259
A	Quantile 1	GO:0006810	transport	5563	1411.56	1465	0.00264
A	Quantile 1	GO:0006413	translational initiation	159	40.34	61	0.00308
A	Quantile 1	GO:0015694	mercury ion transport	10	2.54	7	0.00384
A	Quantile 1	GO:0045116	protein neddylation	10	2.54	7	0.00384
A	Quantile 1	GO:0009853	photorespiration	201	51	67	0.00388
A	Quantile 1	GO:0016444	somatic cell DNA recombination	42	10.66	19	0.00407
A	Quantile 1	GO:0043687	post-translational protein modification	157	39.84	57	0.00416
A	Quantile 1	GO:0050821	protein stabilization	20	5.07	11	0.00445
A	Quantile 1	GO:0006270	DNA replication initiation	79	20.05	31	0.00461
A	Quantile 1	GO:0035269	protein O-linked mannosylation	6	1.52	5	0.00497
A	Quantile 1	GO:0000398	mRNA splicing, via spliceosome	225	57.09	79	0.005
A	Quantile 1	GO:0010389	regulation of G2/M transition of mitotic cell cycle	74	18.78	30	0.00503
A	Quantile 1	GO:0000741	karyogamy	234	59.38	54	0.00517
A	Quantile 1	GO:0006007	glucose catabolic process	115	29.18	42	0.00522
A	Quantile 1	GO:0050665	hydrogen peroxide biosynthetic process	102	25.88	38	0.00524
A	Quantile 1	GO:0006338	chromatin remodeling	67	17	24	0.00531
A	Quantile 1	GO:0000902	cell morphogenesis	1557	395.07	337	0.00611
A	Quantile 1	GO:0008299	isoprenoid biosynthetic process	702	178.13	193	0.00616
A	Quantile 1	GO:0045899	positive regulation of RNA polymerase II transcriptional preinitiation complex assembly	13	3.3	8	0.00622
A	Quantile 1	GO:0080129	proteasome core complex assembly	156	39.58	54	0.00625
A	Quantile 1	GO:0006626	protein targeting to mitochondrion	143	36.28	51	0.00645
A	Quantile 1	GO:0051788	response to misfolded protein	302	76.63	96	0.00696
A	Quantile 1	GO:0006506	GPI anchor biosynthetic process	30	7.61	18	0.00718
A	Quantile 1	GO:0007264	small GTPase mediated signal transduction	135	34.26	47	0.00754
A	Quantile 1	GO:0051510	regulation of unidimensional cell growth	231	58.61	57	0.00781
A	Quantile 1	GO:0006886	intracellular protein transport	1480	375.54	446	0.00786
A	Quantile 1	GO:0032875	regulation of DNA endoreduplication	35	8.88	15	0.00814
A	Quantile 1	GO:0006183	GTP biosynthetic process	11	2.79	7	0.00824
A	Quantile 1	GO:0006665	sphingolipid metabolic process	105	26.64	33	0.00826
A	Quantile 1	GO:0008535	respiratory chain complex IV assembly	23	5.84	10	0.00828
A	Quantile 1	GO:0048573	photoperiodism, flowering	390	98.96	119	0.00858
A	Quantile 1	GO:0006661	phosphatidylinositol biosynthetic process	129	32.73	56	0.00888
A	Quantile 1	GO:0006635	fatty acid beta-oxidation	226	57.35	74	0.00891
A	Quantile 1	GO:0010267	production of ta-siRNAs involved in RNA interference	132	33.49	46	0.00958
A	Quantile 1	GO:0019932	second-messenger-mediated signaling	129	32.73	41	0.00988
A	Quantile 1	GO:0030433	ubiquitin-dependent ERAD pathway	39	9.9	18	0.00989
A	Quantile 1	GO:0006325	chromatin organization	893	226.59	292	0.01068
A	Quantile 1	GO:0005980	glycogen catabolic process	10	2.54	7	0.01078
A	Quantile 1	GO:0006048	UDP-N-acetylglucosamine biosynthetic process	9	2.28	6	0.01078
A	Quantile 1	GO:0006896	Golgi to vacuole transport	22	5.58	11	0.01117
A	Quantile 1	GO:0006450	regulation of translational fidelity	18	4.57	11	0.01128
A	Quantile 1	GO:0090116	C-5 methylation of cytosine	14	3.55	8	0.0113
A	Quantile 1	GO:0006396	RNA processing	1464	371.48	467	0.01132
A	Quantile 1	GO:0035196	production of miRNAs involved in gene silencing by miRNA	172	43.64	57	0.01183
A	Quantile 1	GO:0000462	maturation of SSU-rRNA from tricistronic rRNA transcript (SSU-rRNA, 5.8S rRNA, LSU-rRNA)	42	10.66	19	0.01332
A	Quantile 1	GO:0000027	ribosomal large subunit assembly	34	8.63	15	0.01335
A	Quantile 1	GO:0016255	attachment of GPI anchor to protein	7	1.78	5	0.01375
A	Quantile 1	GO:0032456	endocytic recycling	7	1.78	5	0.01375
A	Quantile 1	GO:0033523	histone H2B ubiquitination	7	1.78	5	0.01375
A	Quantile 1	GO:0006563	L-serine metabolic process	34	8.63	11	0.01376
A	Quantile 1	GO:0016926	protein desumoylation	101	25.63	36	0.01394
A	Quantile 1	GO:0009814	defense response, incompatible interaction	2575	653.38	634	0.01505
A	Quantile 1	GO:0032543	mitochondrial translation	29	7.36	15	0.01534
A	Quantile 1	GO:0009231	riboflavin biosynthetic process	20	5.07	10	0.01538
A	Quantile 1	GO:1901800	positive regulation of proteasomal protein catabolic process	37	9.39	14	0.01547
A	Quantile 1	GO:1903506	regulation of nucleic acid-templated transcription	3940	999.74	999	0.01554
A	Quantile 1	GO:0007034	vacuolar transport	238	60.39	91	0.01613
A	Quantile 1	GO:0034243	regulation of transcription elongation from RNA polymerase II promoter	17	4.31	7	0.01633
A	Quantile 1	GO:0030242	autophagy of peroxisome	3	0.76	3	0.01633
A	Quantile 1	GO:0033512	L-lysine catabolic process to acetyl-CoA via saccharopine	3	0.76	3	0.01633
A	Quantile 1	GO:0043987	histone H3-S10 phosphorylation	3	0.76	3	0.01633
A	Quantile 1	GO:0046967	cytosol to ER transport	3	0.76	3	0.01633
A	Quantile 1	GO:0080121	AMP transport	3	0.76	3	0.01633
A	Quantile 1	GO:0042593	glucose homeostasis	34	8.63	14	0.01649
A	Quantile 1	GO:0045047	protein targeting to ER	40	10.15	14	0.0165
A	Quantile 1	GO:0019348	dolichol metabolic process	18	4.57	8	0.0165
A	Quantile 1	GO:0006436	tryptophanyl-tRNA aminoacylation	5	1.27	4	0.01651
A	Quantile 1	GO:0006695	cholesterol biosynthetic process	5	1.27	4	0.01651
A	Quantile 1	GO:0009660	amyloplast organization	5	1.27	4	0.01651
A	Quantile 1	GO:0010506	regulation of autophagy	37	9.39	9	0.01654
A	Quantile 1	GO:0007000	nucleolus organization	24	6.09	12	0.01656
A	Quantile 1	GO:0044283	small molecule biosynthetic process	2586	656.17	614	0.01667
A	Quantile 1	GO:0016310	phosphorylation	3288	834.3	884	0.01692
A	Quantile 1	GO:0006468	protein phosphorylation	2543	645.26	661	0.01757
A	Quantile 1	GO:0006888	ER to Golgi vesicle-mediated transport	163	41.36	55	0.01783
A	Quantile 1	GO:0006298	mismatch repair	27	6.85	12	0.01888
A	Quantile 1	GO:0000188	inactivation of MAPK activity	15	3.81	8	0.0189
A	Quantile 1	GO:0006075	(1->3)-beta-D-glucan biosynthetic process	15	3.81	8	0.0189
A	Quantile 1	GO:0007062	sister chromatid cohesion	167	42.37	54	0.01973
A	Quantile 1	GO:0010207	photosystem II assembly	191	48.46	63	0.02054
A	Quantile 1	GO:0016311	dephosphorylation	502	127.38	150	0.0211
A	Quantile 1	GO:0006165	nucleoside diphosphate phosphorylation	351	89.06	94	0.02118
A	Quantile 1	GO:0006228	UTP biosynthetic process	10	2.54	6	0.0212
A	Quantile 1	GO:0034314	Arp2/3 complex-mediated actin nucleation	10	2.54	6	0.0212
A	Quantile 1	GO:0043693	monoterpene biosynthetic process	18	4.57	9	0.02126
A	Quantile 1	GO:0016579	protein deubiquitination	133	33.75	45	0.02168
A	Quantile 1	GO:0048449	floral organ formation	395	100.23	92	0.02197
A	Quantile 1	GO:0030422	production of siRNA involved in RNA interference	176	44.66	64	0.02227
A	Quantile 1	GO:0015996	chlorophyll catabolic process	74	18.78	27	0.02229
A	Quantile 1	GO:0015991	ATP hydrolysis coupled proton transport	42	10.66	17	0.02267
A	Quantile 1	GO:0042732	D-xylose metabolic process	39	9.9	16	0.02326
A	Quantile 1	GO:0008380	RNA splicing	490	124.33	163	0.02341
A	Quantile 1	GO:0051726	regulation of cell cycle	442	112.15	149	0.02348
A	Quantile 1	GO:0009769	photosynthesis, light harvesting in photosystem II	36	9.13	15	0.02375
A	Quantile 1	GO:0015986	ATP synthesis coupled proton transport	84	21.31	31	0.02385
A	Quantile 1	GO:0009910	negative regulation of flower development	55	13.96	21	0.02452
A	Quantile 1	GO:0010359	regulation of anion channel activity	284	72.06	62	0.02472
A	Quantile 1	GO:0052543	callose deposition in cell wall	540	137.02	105	0.02516
A	Quantile 1	GO:0007131	reciprocal meiotic recombination	179	45.42	59	0.02519
A	Quantile 1	GO:0006346	methylation-dependent chromatin silencing	146	37.05	48	0.02535
A	Quantile 1	GO:0006301	postreplication repair	73	18.52	27	0.02591
A	Quantile 1	GO:0043248	proteasome assembly	207	52.52	74	0.02613
A	Quantile 1	GO:0048578	positive regulation of long-day photoperiodism, flowering	13	3.3	7	0.02627
A	Quantile 1	GO:0009966	regulation of signal transduction	960	243.59	227	0.02638
A	Quantile 1	GO:0006302	double-strand break repair	299	75.87	103	0.02778
A	Quantile 1	GO:0019745	pentacyclic triterpenoid biosynthetic process	43	10.91	17	0.02883
A	Quantile 1	GO:0070534	protein K63-linked ubiquitination	8	2.03	5	0.02904
A	Quantile 1	GO:0045010	actin nucleation	136	34.51	48	0.02913
A	Quantile 1	GO:0000245	spliceosomal complex assembly	24	6.09	14	0.02943
A	Quantile 1	GO:0015031	protein transport	1750	444.05	529	0.02953
A	Quantile 1	GO:0010228	vegetative to reproductive phase transition of meristem	750	190.31	226	0.03153
A	Quantile 1	GO:0006865	amino acid transport	502	127.38	119	0.03169
A	Quantile 1	GO:0009220	pyrimidine ribonucleotide biosynthetic process	171	43.39	58	0.03171
A	Quantile 1	GO:0015886	heme transport	22	5.58	10	0.03249
A	Quantile 1	GO:0001676	long-chain fatty acid metabolic process	41	10.4	17	0.03269
A	Quantile 1	GO:0010100	negative regulation of photomorphogenesis	28	7.1	12	0.03274
A	Quantile 1	GO:0051225	spindle assembly	72	18.27	24	0.03474
A	Quantile 1	GO:0051246	regulation of protein metabolic process	1013	257.04	277	0.0355
A	Quantile 1	GO:0042023	DNA endoreduplication	122	30.96	45	0.03611
A	Quantile 1	GO:0000911	cytokinesis by cell plate formation	353	89.57	95	0.03637
A	Quantile 1	GO:0010564	regulation of cell cycle process	206	52.27	81	0.03667
A	Quantile 1	GO:0035336	long-chain fatty-acyl-CoA metabolic process	11	2.79	6	0.03676
A	Quantile 1	GO:0016049	cell growth	1717	435.67	376	0.03806
A	Quantile 1	GO:1901135	carbohydrate derivative metabolic process	2635	668.61	708	0.03879
A	Quantile 1	GO:0019252	starch biosynthetic process	253	64.2	77	0.03897
A	Quantile 1	GO:0022904	respiratory electron transport chain	74	18.78	35	0.03932
A	Quantile 1	GO:0000460	maturation of 5.8S rRNA	28	7.1	14	0.0395
A	Quantile 1	GO:0032107	regulation of response to nutrient levels	13	3.3	6	0.03958
A	Quantile 1	GO:0006850	mitochondrial pyruvate transmembrane transport	6	1.52	4	0.03959
A	Quantile 1	GO:0046938	phytochelatin biosynthetic process	6	1.52	4	0.03959
A	Quantile 1	GO:0006281	DNA repair	670	170.01	226	0.0402
A	Quantile 1	GO:0031048	chromatin silencing by small RNA	139	35.27	43	0.0404
A	Quantile 1	GO:0009767	photosynthetic electron transport chain	124	31.46	42	0.04049
A	Quantile 1	GO:0010072	primary shoot apical meristem specification	51	12.94	19	0.04051
A	Quantile 1	GO:0000266	mitochondrial fission	15	3.81	8	0.04122
A	Quantile 1	GO:0006268	DNA unwinding involved in DNA replication	14	3.55	7	0.04124
A	Quantile 1	GO:0007018	microtubule-based movement	72	18.27	26	0.04159
A	Quantile 1	GO:0015979	photosynthesis	585	148.44	187	0.04176
A	Quantile 1	GO:0018105	peptidyl-serine phosphorylation	81	20.55	30	0.0433
A	Quantile 1	GO:0051016	barbed-end actin filament capping	17	4.31	8	0.04362
A	Quantile 1	GO:0031098	stress-activated protein kinase signaling cascade	39	9.9	11	0.04371
A	Quantile 1	GO:0090305	nucleic acid phosphodiester bond hydrolysis	334	84.75	107	0.04545
A	Quantile 1	GO:0016571	histone methylation	370	93.88	130	0.04718
A	Quantile 1	GO:0016572	histone phosphorylation	76	19.28	29	0.04865
A	Quantile 1	GO:0006084	acetyl-CoA metabolic process	109	27.66	36	0.04875
B	Quantile 1	GO:0006354	DNA-templated transcription, elongation	191	48.19	101	1.7e-20
B	Quantile 1	GO:0042773	ATP synthesis coupled electron transport	63	15.9	39	4e-07
B	Quantile 1	GO:0006091	generation of precursor metabolites and energy	1079	272.24	360	1.2e-06
B	Quantile 1	GO:0051788	response to misfolded protein	323	81.49	119	1.6e-06
B	Quantile 1	GO:0015979	photosynthesis	585	147.6	213	5.3e-06
B	Quantile 1	GO:0006412	translation	1135	286.37	374	7e-06
B	Quantile 1	GO:0009853	photorespiration	207	52.23	79	2.4e-05
B	Quantile 1	GO:0019684	photosynthesis, light reaction	406	102.44	145	3.9e-05
B	Quantile 1	GO:0006458	'de novo' protein folding	24	6.06	15	0.00014
B	Quantile 1	GO:0000394	RNA splicing, via endonucleolytic cleavage and ligation	174	43.9	67	0.00021
B	Quantile 1	GO:0080129	proteasome core complex assembly	169	42.64	63	0.00034
B	Quantile 1	GO:0006468	protein phosphorylation	2649	668.36	686	0.00036
B	Quantile 1	GO:0010048	vernalization response	194	48.95	73	0.00037
B	Quantile 1	GO:0010207	photosystem II assembly	194	48.95	72	0.00037
B	Quantile 1	GO:0051762	sesquiterpene biosynthetic process	14	3.53	10	0.00037
B	Quantile 1	GO:0006635	fatty acid beta-oxidation	216	54.5	76	0.00056
B	Quantile 1	GO:0006499	N-terminal protein myristoylation	118	29.77	46	0.00068
B	Quantile 1	GO:0009236	cobalamin biosynthetic process	5	1.26	5	0.00102
B	Quantile 1	GO:0008299	isoprenoid biosynthetic process	718	181.16	206	0.00104
B	Quantile 1	GO:0045338	farnesyl diphosphate metabolic process	19	4.79	10	0.00106
B	Quantile 1	GO:0006413	translational initiation	152	38.35	60	0.00125
B	Quantile 1	GO:0006120	mitochondrial electron transport, NADH to ubiquinone	18	4.54	11	0.00135
B	Quantile 1	GO:0006450	regulation of translational fidelity	23	5.8	15	0.00176
B	Quantile 1	GO:0006810	transport	5587	1409.63	1401	0.002
B	Quantile 1	GO:0006606	protein import into nucleus	138	34.82	53	0.00243
B	Quantile 1	GO:0000028	ribosomal small subunit assembly	19	4.79	11	0.00247
B	Quantile 1	GO:0006506	GPI anchor biosynthetic process	33	8.33	16	0.00267
B	Quantile 1	GO:0010183	pollen tube guidance	68	17.16	28	0.00284
B	Quantile 1	GO:0044267	cellular protein metabolic process	7037	1775.47	1931	0.00334
B	Quantile 1	GO:0001510	RNA methylation	251	63.33	90	0.00354
B	Quantile 1	GO:0009220	pyrimidine ribonucleotide biosynthetic process	168	42.39	60	0.00385
B	Quantile 1	GO:0035196	production of miRNAs involved in gene silencing by miRNA	160	40.37	54	0.0039
B	Quantile 1	GO:0048573	photoperiodism, flowering	375	94.61	122	0.00396
B	Quantile 1	GO:0009086	methionine biosynthetic process	148	37.34	53	0.00401
B	Quantile 1	GO:2001020	regulation of response to DNA damage stimulus	26	6.56	11	0.00405
B	Quantile 1	GO:0046168	glycerol-3-phosphate catabolic process	4	1.01	4	0.00405
B	Quantile 1	GO:0042026	protein refolding	28	7.06	14	0.00412
B	Quantile 1	GO:0016226	iron-sulfur cluster assembly	105	26.49	40	0.00472
B	Quantile 1	GO:1990937	xylan acetylation	6	1.51	5	0.00484
B	Quantile 1	GO:0015991	ATP hydrolysis coupled proton transport	37	9.34	17	0.00499
B	Quantile 1	GO:0006096	glycolytic process	326	82.25	103	0.00547
B	Quantile 1	GO:0048578	positive regulation of long-day photoperiodism, flowering	18	4.54	10	0.0058
B	Quantile 1	GO:0015986	ATP synthesis coupled proton transport	90	22.71	36	0.00591
B	Quantile 1	GO:0010564	regulation of cell cycle process	194	48.95	53	0.00679
B	Quantile 1	GO:0000462	maturation of SSU-rRNA from tricistronic rRNA transcript (SSU-rRNA, 5.8S rRNA, LSU-rRNA)	50	12.62	19	0.00694
B	Quantile 1	GO:0006406	mRNA export from nucleus	100	25.23	38	0.00754
B	Quantile 1	GO:0061136	regulation of proteasomal protein catabolic process	70	17.66	25	0.00775
B	Quantile 1	GO:0016558	protein import into peroxisome matrix	94	23.72	34	0.00878
B	Quantile 1	GO:0009072	aromatic amino acid family metabolic process	669	168.79	148	0.0092
B	Quantile 1	GO:0009793	embryo development ending in seed dormancy	1346	339.6	355	0.01033
B	Quantile 1	GO:0031627	telomeric loop formation	14	3.53	8	0.01091
B	Quantile 1	GO:0000956	nuclear-transcribed mRNA catabolic process	166	41.88	56	0.01128
B	Quantile 1	GO:0016579	protein deubiquitination	125	31.54	44	0.01135
B	Quantile 1	GO:0051604	protein maturation	193	48.69	64	0.01148
B	Quantile 1	GO:0009560	embryo sac egg cell differentiation	134	33.81	46	0.01159
B	Quantile 1	GO:0043693	monoterpene biosynthetic process	31	7.82	14	0.01248
B	Quantile 1	GO:0009933	meristem structural organization	575	145.08	136	0.0125
B	Quantile 1	GO:0006384	transcription initiation from RNA polymerase III promoter	7	1.77	5	0.01341
B	Quantile 1	GO:0006646	phosphatidylethanolamine biosynthetic process	7	1.77	5	0.01341
B	Quantile 1	GO:0015790	UDP-xylose transmembrane transport	7	1.77	5	0.01341
B	Quantile 1	GO:0045903	positive regulation of translational fidelity	7	1.77	5	0.01341
B	Quantile 1	GO:0070940	dephosphorylation of RNA polymerase II C-terminal domain	7	1.77	5	0.01341
B	Quantile 1	GO:0042147	retrograde transport, endosome to Golgi	20	5.05	10	0.01477
B	Quantile 1	GO:0010267	production of ta-siRNAs involved in RNA interference	129	32.55	44	0.01499
B	Quantile 1	GO:0032543	mitochondrial translation	36	9.08	15	0.01587
B	Quantile 1	GO:0006488	dolichol-linked oligosaccharide biosynthetic process	4	1.01	4	0.01605
B	Quantile 1	GO:0000455	enzyme-directed rRNA pseudouridine synthesis	3	0.76	3	0.01606
B	Quantile 1	GO:0019484	beta-alanine catabolic process	3	0.76	3	0.01606
B	Quantile 1	GO:0090213	regulation of radial pattern formation	3	0.76	3	0.01606
B	Quantile 1	GO:0034402	recruitment of 3'-end processing factors to RNA polymerase II holoenzyme complex	5	1.26	4	0.01616
B	Quantile 1	GO:0051307	meiotic chromosome separation	16	4.04	5	0.01618
B	Quantile 1	GO:0010074	maintenance of meristem identity	93	23.46	26	0.01717
B	Quantile 1	GO:0030488	tRNA methylation	25	6.31	13	0.01822
B	Quantile 1	GO:0009610	response to symbiotic fungus	112	28.26	39	0.01829
B	Quantile 1	GO:0006085	acetyl-CoA biosynthetic process	26	6.56	15	0.02055
B	Quantile 1	GO:0006122	mitochondrial electron transport, ubiquinol to cytochrome c	10	2.52	6	0.02062
B	Quantile 1	GO:0009088	threonine biosynthetic process	10	2.52	6	0.02062
B	Quantile 1	GO:0007062	sister chromatid cohesion	159	40.12	53	0.02118
B	Quantile 1	GO:0019288	isopentenyl diphosphate biosynthetic process, methylerythritol 4-phosphate pathway	276	69.64	84	0.02121
B	Quantile 1	GO:0008380	RNA splicing	483	121.86	163	0.02181
B	Quantile 1	GO:0050821	protein stabilization	21	5.3	10	0.02193
B	Quantile 1	GO:0006281	DNA repair	710	179.14	206	0.02195
B	Quantile 1	GO:0006730	one-carbon metabolic process	47	11.86	19	0.02206
B	Quantile 1	GO:0042732	D-xylose metabolic process	39	9.84	16	0.02209
B	Quantile 1	GO:0006952	defense response	6700	1690.45	1659	0.02214
B	Quantile 1	GO:0010072	primary shoot apical meristem specification	52	13.12	20	0.02415
B	Quantile 1	GO:0006626	protein targeting to mitochondrion	133	33.56	50	0.02447
B	Quantile 1	GO:0006086	acetyl-CoA biosynthetic process from pyruvate	13	3.28	7	0.02549
B	Quantile 1	GO:0061077	chaperone-mediated protein folding	59	14.89	24	0.02621
B	Quantile 1	GO:0045038	protein import into chloroplast thylakoid membrane	8	2.02	5	0.02836
B	Quantile 1	GO:0045039	protein import into mitochondrial inner membrane	8	2.02	5	0.02836
B	Quantile 1	GO:0010225	response to UV-C	12	3.03	6	0.02836
B	Quantile 1	GO:0016114	terpenoid biosynthetic process	479	120.85	122	0.02856
B	Quantile 1	GO:0009089	lysine biosynthetic process via diaminopimelate	16	4.04	8	0.02857
B	Quantile 1	GO:0016055	Wnt signaling pathway	16	4.04	8	0.02857
B	Quantile 1	GO:0045899	positive regulation of RNA polymerase II transcriptional preinitiation complex assembly	16	4.04	8	0.02857
B	Quantile 1	GO:0051726	regulation of cell cycle	432	109	120	0.02913
B	Quantile 1	GO:0006446	regulation of translational initiation	46	11.61	19	0.02929
B	Quantile 1	GO:0032204	regulation of telomere maintenance	54	13.62	21	0.02978
B	Quantile 1	GO:0010182	sugar mediated signaling pathway	171	43.14	54	0.031
B	Quantile 1	GO:0016106	sesquiterpenoid biosynthetic process	112	28.26	29	0.03141
B	Quantile 1	GO:0000741	karyogamy	287	72.41	55	0.03214
B	Quantile 1	GO:0009616	virus induced gene silencing	220	55.51	66	0.03259
B	Quantile 1	GO:0016032	viral process	125	31.54	42	0.0329
B	Quantile 1	GO:0030422	production of siRNA involved in RNA interference	173	43.65	62	0.03538
B	Quantile 1	GO:0006491	N-glycan processing	11	2.78	6	0.0358
B	Quantile 1	GO:0042148	strand invasion	11	2.78	6	0.0358
B	Quantile 1	GO:0009966	regulation of signal transduction	1023	258.11	221	0.03593
B	Quantile 1	GO:0016444	somatic cell DNA recombination	41	10.34	16	0.03593
B	Quantile 1	GO:0022904	respiratory electron transport chain	72	18.17	44	0.03837
B	Quantile 1	GO:0006517	protein deglycosylation	6	1.51	4	0.03881
B	Quantile 1	GO:0009939	positive regulation of gibberellic acid mediated signaling pathway	6	1.51	4	0.03881
B	Quantile 1	GO:0051014	actin filament severing	6	1.51	4	0.03881
B	Quantile 1	GO:0045859	regulation of protein kinase activity	166	41.88	42	0.03886
B	Quantile 1	GO:0009769	photosynthesis, light harvesting in photosystem II	35	8.83	14	0.03896
B	Quantile 1	GO:0009630	gravitropism	413	104.2	116	0.03914
B	Quantile 1	GO:0019748	secondary metabolic process	1784	450.11	384	0.03936
B	Quantile 1	GO:0009772	photosynthetic electron transport in photosystem II	14	3.53	7	0.04007
B	Quantile 1	GO:0006511	ubiquitin-dependent protein catabolic process	1165	293.94	308	0.04016
B	Quantile 1	GO:0080027	response to herbivore	78	19.68	27	0.04074
B	Quantile 1	GO:0006383	transcription by RNA polymerase III	58	14.63	25	0.04206
B	Quantile 1	GO:0016571	histone methylation	366	92.34	103	0.04236
B	Quantile 1	GO:0006995	cellular response to nitrogen starvation	209	52.73	64	0.04469
B	Quantile 1	GO:0006623	protein targeting to vacuole	165	41.63	52	0.04729
B	Quantile 1	GO:0009697	salicylic acid biosynthetic process	345	87.05	101	0.04832
D	Quantile 1	GO:0006354	DNA-templated transcription, elongation	266	67.2	182	1e-30
D	Quantile 1	GO:0006412	translation	1129	285.22	439	7.5e-21
D	Quantile 1	GO:0010207	photosystem II assembly	247	62.4	117	1.4e-13
D	Quantile 1	GO:0019684	photosynthesis, light reaction	509	128.59	227	7.6e-13
D	Quantile 1	GO:0006606	protein import into nucleus	140	35.37	67	6.6e-10
D	Quantile 1	GO:0006091	generation of precursor metabolites and energy	1188	300.12	428	3.5e-07
D	Quantile 1	GO:0009767	photosynthetic electron transport chain	152	38.4	66	1.4e-06
D	Quantile 1	GO:0006413	translational initiation	146	36.88	67	1.4e-06
D	Quantile 1	GO:0000394	RNA splicing, via endonucleolytic cleavage and ligation	178	44.97	70	3.1e-06
D	Quantile 1	GO:0009560	embryo sac egg cell differentiation	139	35.12	59	7e-06
D	Quantile 1	GO:0015979	photosynthesis	708	178.86	303	1.2e-05
D	Quantile 1	GO:0006406	mRNA export from nucleus	95	24	44	3.8e-05
D	Quantile 1	GO:0006810	transport	5532	1397.53	1431	4.3e-05
D	Quantile 1	GO:0001510	RNA methylation	257	64.92	97	6.1e-05
D	Quantile 1	GO:0009561	megagametogenesis	548	138.44	164	7.1e-05
D	Quantile 1	GO:0016444	somatic cell DNA recombination	39	9.85	21	0.00013
D	Quantile 1	GO:0000724	double-strand break repair via homologous recombination	208	52.55	74	0.00018
D	Quantile 1	GO:0009772	photosynthetic electron transport in photosystem II	27	6.82	16	0.00018
D	Quantile 1	GO:0007129	synapsis	108	27.28	43	0.00024
D	Quantile 1	GO:0006621	protein retention in ER lumen	6	1.52	6	0.00026
D	Quantile 1	GO:0000398	mRNA splicing, via spliceosome	214	54.06	79	0.00026
D	Quantile 1	GO:0051762	sesquiterpene biosynthetic process	16	4.04	11	0.00031
D	Quantile 1	GO:0032456	endocytic recycling	8	2.02	7	0.00041
D	Quantile 1	GO:0006906	vesicle fusion	45	11.37	24	0.00043
D	Quantile 1	GO:0009814	defense response, incompatible interaction	2612	659.86	632	0.00048
D	Quantile 1	GO:0009769	photosynthesis, light harvesting in photosystem II	48	12.13	23	0.00058
D	Quantile 1	GO:0071805	potassium ion transmembrane transport	164	41.43	53	0.00074
D	Quantile 1	GO:0009861	jasmonic acid and ethylene-dependent systemic resistance	105	26.53	35	0.00098
D	Quantile 1	GO:0042773	ATP synthesis coupled electron transport	72	18.19	34	0.00101
D	Quantile 1	GO:0022904	respiratory electron transport chain	86	21.73	43	0.00126
D	Quantile 1	GO:0045116	protein neddylation	9	2.27	7	0.00143
D	Quantile 1	GO:0051301	cell division	1069	270.06	265	0.00154
D	Quantile 1	GO:0043687	post-translational protein modification	155	39.16	58	0.00157
D	Quantile 1	GO:0009630	gravitropism	417	105.35	132	0.00162
D	Quantile 1	GO:0007131	reciprocal meiotic recombination	176	44.46	62	0.00178
D	Quantile 1	GO:0009615	response to virus	779	196.8	200	0.00202
D	Quantile 1	GO:0006468	protein phosphorylation	2614	660.37	672	0.00207
D	Quantile 1	GO:0009311	oligosaccharide metabolic process	349	88.17	107	0.00219
D	Quantile 1	GO:0006506	GPI anchor biosynthetic process	32	8.08	19	0.0023
D	Quantile 1	GO:0000160	phosphorelay signal transduction system	636	160.67	145	0.00243
D	Quantile 1	GO:0016310	phosphorylation	3352	846.8	907	0.00249
D	Quantile 1	GO:0010048	vernalization response	189	47.75	67	0.00299
D	Quantile 1	GO:0006626	protein targeting to mitochondrion	139	35.12	49	0.0034
D	Quantile 1	GO:0006623	protein targeting to vacuole	173	43.7	60	0.00354
D	Quantile 1	GO:0000278	mitotic cell cycle	716	180.88	198	0.00397
D	Quantile 1	GO:0000460	maturation of 5.8S rRNA	26	6.57	15	0.00406
D	Quantile 1	GO:0006396	RNA processing	1452	366.81	491	0.00409
D	Quantile 1	GO:0006402	mRNA catabolic process	192	48.5	77	0.00438
D	Quantile 1	GO:0006312	mitotic recombination	80	20.21	32	0.00443
D	Quantile 1	GO:0042254	ribosome biogenesis	541	136.67	192	0.00444
D	Quantile 1	GO:0016255	attachment of GPI anchor to protein	8	2.02	6	0.00447
D	Quantile 1	GO:0051321	meiotic cell cycle	589	148.8	160	0.00449
D	Quantile 1	GO:0000478	endonucleolytic cleavage involved in rRNA processing	28	7.07	13	0.00451
D	Quantile 1	GO:0006535	cysteine biosynthetic process from serine	15	3.79	9	0.00451
D	Quantile 1	GO:0031627	telomeric loop formation	15	3.79	9	0.00451
D	Quantile 1	GO:0007062	sister chromatid cohesion	163	41.18	61	0.00462
D	Quantile 1	GO:0006865	amino acid transport	487	123.03	113	0.00464
D	Quantile 1	GO:0070291	N-acylethanolamine metabolic process	6	1.52	5	0.00487
D	Quantile 1	GO:0007052	mitotic spindle organization	22	5.56	9	0.00487
D	Quantile 1	GO:0006891	intra-Golgi vesicle-mediated transport	90	22.74	36	0.00511
D	Quantile 1	GO:0000956	nuclear-transcribed mRNA catabolic process	168	42.44	69	0.00512
D	Quantile 1	GO:0010564	regulation of cell cycle process	200	50.53	67	0.00513
D	Quantile 1	GO:0032204	regulation of telomere maintenance	60	15.16	25	0.00518
D	Quantile 1	GO:0015991	ATP hydrolysis coupled proton transport	49	12.38	21	0.00535
D	Quantile 1	GO:0010228	vegetative to reproductive phase transition of meristem	729	184.16	218	0.00562
D	Quantile 1	GO:0006364	rRNA processing	395	99.79	139	0.00572
D	Quantile 1	GO:0006325	chromatin organization	884	223.32	262	0.00584
D	Quantile 1	GO:0000184	nuclear-transcribed mRNA catabolic process, nonsense-mediated decay	20	5.05	12	0.00585
D	Quantile 1	GO:0006360	transcription by RNA polymerase I	18	4.55	10	0.00586
D	Quantile 1	GO:0000023	maltose metabolic process	179	45.22	61	0.00621
D	Quantile 1	GO:0009640	photomorphogenesis	583	147.28	169	0.00645
D	Quantile 1	GO:0048449	floral organ formation	439	110.9	96	0.00647
D	Quantile 1	GO:0016925	protein sumoylation	36	9.09	17	0.00684
D	Quantile 1	GO:0045338	farnesyl diphosphate metabolic process	24	6.06	12	0.00784
D	Quantile 1	GO:0009098	leucine biosynthetic process	11	2.78	7	0.00803
D	Quantile 1	GO:0009970	cellular response to sulfate starvation	33	8.34	15	0.0093
D	Quantile 1	GO:0019745	pentacyclic triterpenoid biosynthetic process	45	11.37	19	0.0095
D	Quantile 1	GO:0010587	miRNA catabolic process	9	2.27	6	0.01054
D	Quantile 1	GO:0010027	thylakoid membrane organization	241	60.88	77	0.01133
D	Quantile 1	GO:0006952	defense response	6492	1640.05	1543	0.01189
D	Quantile 1	GO:0016570	histone modification	511	129.09	150	0.0126
D	Quantile 1	GO:0010225	response to UV-C	13	3.28	9	0.01346
D	Quantile 1	GO:0000470	maturation of LSU-rRNA	21	5.31	10	0.01347
D	Quantile 1	GO:0043967	histone H4 acetylation	18	4.55	8	0.01348
D	Quantile 1	GO:0000244	spliceosomal tri-snRNP complex assembly	7	1.77	5	0.01348
D	Quantile 1	GO:0006646	phosphatidylethanolamine biosynthetic process	7	1.77	5	0.01348
D	Quantile 1	GO:0043157	response to cation stress	7	1.77	5	0.01348
D	Quantile 1	GO:0080036	regulation of cytokinin-activated signaling pathway	19	4.8	9	0.01509
D	Quantile 1	GO:0016120	carotene biosynthetic process	12	3.03	7	0.0151
D	Quantile 1	GO:0006790	sulfur compound metabolic process	1481	374.14	346	0.01551
D	Quantile 1	GO:0032543	mitochondrial translation	31	7.83	15	0.016
D	Quantile 1	GO:0006465	signal peptide processing	23	5.81	11	0.01604
D	Quantile 1	GO:0006896	Golgi to vacuole transport	23	5.81	11	0.01604
D	Quantile 1	GO:0019985	translesion synthesis	9	2.27	5	0.01611
D	Quantile 1	GO:0001778	plasma membrane repair	3	0.76	3	0.01612
D	Quantile 1	GO:0006428	isoleucyl-tRNA aminoacylation	3	0.76	3	0.01612
D	Quantile 1	GO:0034473	U1 snRNA 3'-end processing	3	0.76	3	0.01612
D	Quantile 1	GO:0034476	U5 snRNA 3'-end processing	3	0.76	3	0.01612
D	Quantile 1	GO:0042776	mitochondrial ATP synthesis coupled proton transport	3	0.76	3	0.01612
D	Quantile 1	GO:0043987	histone H3-S10 phosphorylation	3	0.76	3	0.01612
D	Quantile 1	GO:0046902	regulation of mitochondrial membrane permeability	3	0.76	3	0.01612
D	Quantile 1	GO:0071042	nuclear polyadenylation-dependent mRNA catabolic process	3	0.76	3	0.01612
D	Quantile 1	GO:1903830	magnesium ion transmembrane transport	3	0.76	3	0.01612
D	Quantile 1	GO:1904216	positive regulation of protein import into chloroplast stroma	3	0.76	3	0.01612
D	Quantile 1	GO:0031047	gene silencing by RNA	419	105.85	127	0.0162
D	Quantile 1	GO:0000289	nuclear-transcribed mRNA poly(A) tail shortening	11	2.78	7	0.01623
D	Quantile 1	GO:0000973	posttranscriptional tethering of RNA polymerase II gene DNA at nuclear periphery	5	1.26	4	0.01624
D	Quantile 1	GO:0009660	amyloplast organization	5	1.26	4	0.01624
D	Quantile 1	GO:0046740	transport of virus in host, cell to cell	5	1.26	4	0.01624
D	Quantile 1	GO:0080145	cysteine homeostasis	5	1.26	4	0.01624
D	Quantile 1	GO:0006544	glycine metabolic process	89	22.48	24	0.01625
D	Quantile 1	GO:0000085	mitotic G2 phase	44	11.12	18	0.01644
D	Quantile 1	GO:0010374	stomatal complex development	472	119.24	98	0.01645
D	Quantile 1	GO:0000462	maturation of SSU-rRNA from tricistronic rRNA transcript (SSU-rRNA, 5.8S rRNA, LSU-rRNA)	45	11.37	19	0.01707
D	Quantile 1	GO:0023014	signal transduction by protein phosphorylation	472	119.24	119	0.01745
D	Quantile 1	GO:0051788	response to misfolded protein	297	75.03	92	0.018
D	Quantile 1	GO:0006450	regulation of translational fidelity	21	5.31	11	0.01838
D	Quantile 1	GO:0006486	protein glycosylation	288	72.76	92	0.01897
D	Quantile 1	GO:0007165	signal transduction	5053	1276.52	1158	0.01936
D	Quantile 1	GO:0043248	proteasome assembly	203	51.28	63	0.01947
D	Quantile 1	GO:0015986	ATP synthesis coupled proton transport	101	25.52	38	0.01998
D	Quantile 1	GO:0042138	meiotic DNA double-strand break formation	97	24.5	34	0.02011
D	Quantile 1	GO:0046520	sphingoid biosynthetic process	50	12.63	20	0.02033
D	Quantile 1	GO:0048578	positive regulation of long-day photoperiodism, flowering	18	4.55	9	0.02066
D	Quantile 1	GO:0046621	negative regulation of organ growth	10	2.53	6	0.02075
D	Quantile 1	GO:0016579	protein deubiquitination	141	35.62	47	0.0217
D	Quantile 1	GO:0031507	heterochromatin assembly	21	5.31	10	0.02212
D	Quantile 1	GO:0010332	response to gamma radiation	131	33.09	44	0.02264
D	Quantile 1	GO:0050821	protein stabilization	24	6.06	11	0.02297
D	Quantile 1	GO:0009220	pyrimidine ribonucleotide biosynthetic process	168	42.44	57	0.0231
D	Quantile 1	GO:0006446	regulation of translational initiation	44	11.12	19	0.02317
D	Quantile 1	GO:0016573	histone acetylation	71	17.94	25	0.02332
D	Quantile 1	GO:0009933	meristem structural organization	610	154.1	145	0.02334
D	Quantile 1	GO:0009086	methionine biosynthetic process	152	38.4	49	0.0244
D	Quantile 1	GO:0034314	Arp2/3 complex-mediated actin nucleation	13	3.28	7	0.02566
D	Quantile 1	GO:0016926	protein desumoylation	99	25.01	34	0.0273
D	Quantile 1	GO:0006221	pyrimidine nucleotide biosynthetic process	202	51.03	67	0.02829
D	Quantile 1	GO:0043928	exonucleolytic nuclear-transcribed mRNA catabolic process involved in deadenylation-dependent decay	10	2.53	7	0.02848
D	Quantile 1	GO:0000077	DNA damage checkpoint	28	7.07	11	0.02849
D	Quantile 1	GO:0009649	entrainment of circadian clock	8	2.02	5	0.02851
D	Quantile 1	GO:0010507	negative regulation of autophagy	8	2.02	5	0.02851
D	Quantile 1	GO:1901409	positive regulation of phosphorylation of RNA polymerase II C-terminal domain	8	2.02	5	0.02851
D	Quantile 1	GO:0019432	triglyceride biosynthetic process	42	10.61	17	0.02869
D	Quantile 1	GO:0010501	RNA secondary structure unwinding	56	14.15	21	0.02874
D	Quantile 1	GO:0018298	protein-chromophore linkage	56	14.15	21	0.02874
D	Quantile 1	GO:0042549	photosystem II stabilization	16	4.04	8	0.02878
D	Quantile 1	GO:0016226	iron-sulfur cluster assembly	120	30.32	40	0.02911
D	Quantile 1	GO:0006260	DNA replication	370	93.47	119	0.02937
D	Quantile 1	GO:0006303	double-strand break repair via nonhomologous end joining	19	4.8	9	0.03062
D	Quantile 1	GO:0048278	vesicle docking	58	14.65	16	0.0307
D	Quantile 1	GO:0045333	cellular respiration	245	61.89	90	0.03093
D	Quantile 1	GO:0006261	DNA-dependent DNA replication	298	75.28	91	0.03096
D	Quantile 1	GO:0010090	trichome morphogenesis	214	54.06	66	0.0315
D	Quantile 1	GO:0016106	sesquiterpenoid biosynthetic process	115	29.05	23	0.0322
D	Quantile 1	GO:0035725	sodium ion transmembrane transport	49	12.38	19	0.03474
D	Quantile 1	GO:0016973	poly(A)+ mRNA export from nucleus	11	2.78	6	0.03601
D	Quantile 1	GO:0019915	lipid storage	122	30.82	40	0.0376
D	Quantile 1	GO:0006281	DNA repair	626	158.14	206	0.03767
D	Quantile 1	GO:0006289	nucleotide-excision repair	46	11.62	18	0.03782
D	Quantile 1	GO:0032508	DNA duplex unwinding	53	13.39	18	0.0379
D	Quantile 1	GO:0046713	borate transport	104	26.27	34	0.03863
D	Quantile 1	GO:0000467	exonucleolytic trimming to generate mature 3'-end of 5.8S rRNA from tricistronic rRNA transcript (SSU-rRNA, 5.8S rRNA, LSU-rRNA)	6	1.52	4	0.03898
D	Quantile 1	GO:0006384	transcription initiation from RNA polymerase III promoter	6	1.52	4	0.03898
D	Quantile 1	GO:0010042	response to manganese ion	6	1.52	4	0.03898
D	Quantile 1	GO:0010213	non-photoreactive DNA repair	6	1.52	4	0.03898
D	Quantile 1	GO:0010220	positive regulation of vernalization response	6	1.52	4	0.03898
D	Quantile 1	GO:0010390	histone monoubiquitination	6	1.52	4	0.03898
D	Quantile 1	GO:0015739	sialic acid transport	6	1.52	4	0.03898
D	Quantile 1	GO:0018344	protein geranylgeranylation	6	1.52	4	0.03898
D	Quantile 1	GO:0048505	regulation of timing of cell differentiation	6	1.52	4	0.03898
D	Quantile 1	GO:0051014	actin filament severing	6	1.52	4	0.03898
D	Quantile 1	GO:0071035	nuclear polyadenylation-dependent rRNA catabolic process	6	1.52	4	0.03898
D	Quantile 1	GO:0071038	nuclear polyadenylation-dependent tRNA catabolic process	6	1.52	4	0.03898
D	Quantile 1	GO:0071494	cellular response to UV-C	6	1.52	4	0.03898
D	Quantile 1	GO:2000114	regulation of establishment of cell polarity	6	1.52	4	0.03898
D	Quantile 1	GO:0016233	telomere capping	10	2.53	5	0.03898
D	Quantile 1	GO:0045787	positive regulation of cell cycle	52	13.14	18	0.04029
D	Quantile 1	GO:0006122	mitochondrial electron transport, ubiquinol to cytochrome c	14	3.54	7	0.04033
D	Quantile 1	GO:0019430	removal of superoxide radicals	18	4.55	8	0.04033
D	Quantile 1	GO:0007049	cell cycle	1407	355.45	398	0.04104
D	Quantile 1	GO:0008643	carbohydrate transport	206	52.04	49	0.04142
D	Quantile 1	GO:0006635	fatty acid beta-oxidation	222	56.08	68	0.04171
D	Quantile 1	GO:0006301	postreplication repair	67	16.93	26	0.04195
D	Quantile 1	GO:0006383	transcription by RNA polymerase III	50	12.63	21	0.04242
D	Quantile 1	GO:0080155	regulation of double fertilization forming a zygote and endosperm	17	4.29	8	0.04258
D	Quantile 1	GO:0006094	gluconeogenesis	216	54.57	66	0.04489
D	Quantile 1	GO:0010072	primary shoot apical meristem specification	52	13.14	19	0.04715
D	Quantile 1	GO:0045944	positive regulation of transcription by RNA polymerase II	110	27.79	41	0.04764
D	Quantile 1	GO:0016117	carotenoid biosynthetic process	142	35.87	45	0.04782
D	Quantile 1	GO:0010053	root epidermal cell differentiation	696	175.83	167	0.04834
All	Quantile 2	GO:0006886	intracellular protein transport	4274	1111.06	1233	4.5e-09
All	Quantile 2	GO:0007165	signal transduction	14964	3890.02	3931	1.6e-07
All	Quantile 2	GO:0009630	gravitropism	1244	323.39	377	2.5e-07
All	Quantile 2	GO:0000956	nuclear-transcribed mRNA catabolic process	500	129.98	189	8.5e-07
All	Quantile 2	GO:0006346	methylation-dependent chromatin silencing	445	115.68	160	2.9e-06
All	Quantile 2	GO:0006487	protein N-linked glycosylation	403	104.76	140	3.4e-06
All	Quantile 2	GO:0051567	histone H3-K9 methylation	670	174.17	231	3.9e-06
All	Quantile 2	GO:0016579	protein deubiquitination	399	103.72	146	5e-06
All	Quantile 2	GO:0016558	protein import into peroxisome matrix	302	78.51	116	8e-06
All	Quantile 2	GO:0016569	covalent chromatin modification	1817	472.35	622	9e-06
All	Quantile 2	GO:0016246	RNA interference	647	168.19	216	1.6e-05
All	Quantile 2	GO:0006094	gluconeogenesis	658	171.05	219	1.8e-05
All	Quantile 2	GO:0080129	proteasome core complex assembly	477	124	165	1.9e-05
All	Quantile 2	GO:0010082	regulation of root meristem growth	287	74.61	105	4.9e-05
All	Quantile 2	GO:0006893	Golgi to plasma membrane transport	21	5.46	15	5.3e-05
All	Quantile 2	GO:0031537	regulation of anthocyanin metabolic process	441	114.64	96	5.6e-05
All	Quantile 2	GO:0032197	transposition, RNA-mediated	14	3.64	11	5.9e-05
All	Quantile 2	GO:0090241	negative regulation of histone H4 acetylation	14	3.64	11	5.9e-05
All	Quantile 2	GO:0051574	positive regulation of histone H3-K9 methylation	63	16.38	23	5.9e-05
All	Quantile 2	GO:0009887	animal organ morphogenesis	1151	299.21	352	6.7e-05
All	Quantile 2	GO:0033044	regulation of chromosome organization	591	153.64	213	7.7e-05
All	Quantile 2	GO:0051788	response to misfolded protein	922	239.68	289	0.0001
All	Quantile 2	GO:0006310	DNA recombination	1491	387.6	440	0.0001
All	Quantile 2	GO:0018106	peptidyl-histidine phosphorylation	51	13.26	26	0.00012
All	Quantile 2	GO:0006349	regulation of gene expression by genetic imprinting	62	16.12	30	0.00013
All	Quantile 2	GO:0006635	fatty acid beta-oxidation	664	172.61	219	0.00013
All	Quantile 2	GO:0006396	RNA processing	4360	1133.42	1301	0.00015
All	Quantile 2	GO:0016926	protein desumoylation	304	79.03	108	0.00015
All	Quantile 2	GO:0000911	cytokinesis by cell plate formation	1068	277.64	295	0.00015
All	Quantile 2	GO:0010498	proteasomal protein catabolic process	2022	525.64	592	0.00015
All	Quantile 2	GO:0010051	xylem and phloem pattern formation	1378	358.22	404	0.00016
All	Quantile 2	GO:0000902	cell morphogenesis	4717	1226.23	1274	0.00017
All	Quantile 2	GO:0042147	retrograde transport, endosome to Golgi	63	16.38	30	0.00017
All	Quantile 2	GO:0009855	determination of bilateral symmetry	398	103.46	136	0.00018
All	Quantile 2	GO:0050665	hydrogen peroxide biosynthetic process	308	80.07	111	0.00018
All	Quantile 2	GO:0019243	methylglyoxal catabolic process to D-lactate via S-lactoyl-glutathione	257	66.81	93	0.0002
All	Quantile 2	GO:0046686	response to cadmium ion	3081	800.93	887	0.00021
All	Quantile 2	GO:0006275	regulation of DNA replication	430	111.78	147	0.00023
All	Quantile 2	GO:0000278	mitotic cell cycle	2162	562.03	662	0.00026
All	Quantile 2	GO:0007030	Golgi organization	1366	355.1	412	0.00027
All	Quantile 2	GO:0051028	mRNA transport	392	101.9	124	0.00028
All	Quantile 2	GO:0016192	vesicle-mediated transport	3081	800.93	985	0.00029
All	Quantile 2	GO:0009957	epidermal cell fate specification	56	14.56	27	0.00029
All	Quantile 2	GO:0006520	cellular amino acid metabolic process	4175	1085.33	1097	0.00032
All	Quantile 2	GO:0048481	plant ovule development	1500	389.94	449	0.00032
All	Quantile 2	GO:0048364	root development	6184	1607.58	1668	0.0004
All	Quantile 2	GO:0009965	leaf morphogenesis	2118	550.59	585	0.0004
All	Quantile 2	GO:0010043	response to zinc ion	1054	274	322	0.0004
All	Quantile 2	GO:0015867	ATP transport	38	9.88	20	0.00042
All	Quantile 2	GO:0006629	lipid metabolic process	8716	2265.8	2412	0.00043
All	Quantile 2	GO:0009266	response to temperature stimulus	12674	3294.72	3203	0.00044
All	Quantile 2	GO:0009165	nucleotide biosynthetic process	3155	820.17	970	0.00053
All	Quantile 2	GO:0006270	DNA replication initiation	234	60.83	84	0.00054
All	Quantile 2	GO:0000086	G2/M transition of mitotic cell cycle	231	60.05	79	0.00055
All	Quantile 2	GO:0043153	entrainment of circadian clock by photoperiod	10	2.6	8	0.00056
All	Quantile 2	GO:0010014	meristem initiation	802	208.49	251	0.00061
All	Quantile 2	GO:0007010	cytoskeleton organization	2611	678.75	808	0.00062
All	Quantile 2	GO:0009944	polarity specification of adaxial/abaxial axis	981	255.02	300	0.00067
All	Quantile 2	GO:0042138	meiotic DNA double-strand break formation	292	75.91	101	0.00069
All	Quantile 2	GO:0006306	DNA methylation	681	177.03	232	0.00072
All	Quantile 2	GO:0031048	chromatin silencing by small RNA	415	107.88	137	0.00075
All	Quantile 2	GO:0009853	photorespiration	601	156.24	197	0.00076
All	Quantile 2	GO:0016126	sterol biosynthetic process	630	163.77	195	0.00082
All	Quantile 2	GO:0009560	embryo sac egg cell differentiation	421	109.44	141	0.00088
All	Quantile 2	GO:1901140	p-coumaryl alcohol transport	51	13.26	24	0.00096
All	Quantile 2	GO:0043087	regulation of GTPase activity	246	63.95	87	0.00097
All	Quantile 2	GO:0006096	glycolytic process	989	257.1	301	0.00101
All	Quantile 2	GO:0009911	positive regulation of flower development	974	253.2	296	0.0011
All	Quantile 2	GO:0030307	positive regulation of cell growth	51	13.26	24	0.00114
All	Quantile 2	GO:0007062	sister chromatid cohesion	489	127.12	162	0.0012
All	Quantile 2	GO:0016197	endosomal transport	192	49.91	75	0.00125
All	Quantile 2	GO:1901679	nucleotide transmembrane transport	100	26	40	0.00127
All	Quantile 2	GO:0048015	phosphatidylinositol-mediated signaling	20	5.2	12	0.00136
All	Quantile 2	GO:0009846	pollen germination	1235	321.05	368	0.00136
All	Quantile 2	GO:0071366	cellular response to indolebutyric acid stimulus	55	14.3	25	0.00142
All	Quantile 2	GO:0046854	phosphatidylinositol phosphorylation	134	34.83	51	0.00144
All	Quantile 2	GO:0010103	stomatal complex morphogenesis	1082	281.28	327	0.00158
All	Quantile 2	GO:0045010	actin nucleation	410	106.58	135	0.00159
All	Quantile 2	GO:0006261	DNA-dependent DNA replication	895	232.66	302	0.00174
All	Quantile 2	GO:0045132	meiotic chromosome segregation	559	145.32	186	0.00183
All	Quantile 2	GO:0007131	reciprocal meiotic recombination	529	137.52	175	0.00189
All	Quantile 2	GO:0016132	brassinosteroid biosynthetic process	641	166.63	196	0.00201
All	Quantile 2	GO:0015692	lead ion transport	65	16.9	28	0.00207
All	Quantile 2	GO:0009220	pyrimidine ribonucleotide biosynthetic process	507	131.8	165	0.00208
All	Quantile 2	GO:0044267	cellular protein metabolic process	20848	5419.62	5840	0.0024
All	Quantile 2	GO:0006312	mitotic recombination	235	61.09	82	0.00241
All	Quantile 2	GO:0036092	phosphatidylinositol-3-phosphate biosynthetic process	21	5.46	12	0.00242
All	Quantile 2	GO:0090502	RNA phosphodiester bond hydrolysis, endonucleolytic	335	87.09	110	0.00252
All	Quantile 2	GO:0006511	ubiquitin-dependent protein catabolic process	3354	871.9	959	0.00255
All	Quantile 2	GO:0090333	regulation of stomatal closure	87	22.62	35	0.0026
All	Quantile 2	GO:0006623	protein targeting to vacuole	509	132.32	161	0.00273
All	Quantile 2	GO:0006470	protein dephosphorylation	948	246.44	263	0.0028
All	Quantile 2	GO:0006099	tricarboxylic acid cycle	167	43.41	60	0.0029
All	Quantile 2	GO:0055065	metal ion homeostasis	2096	544.87	537	0.0029
All	Quantile 2	GO:0044265	cellular macromolecule catabolic process	4872	1266.52	1467	0.00295
All	Quantile 2	GO:2000014	regulation of endosperm development	43	11.18	20	0.00296
All	Quantile 2	GO:0030010	establishment of cell polarity	47	12.22	21	0.00305
All	Quantile 2	GO:0055047	generative cell mitosis	24	6.24	13	0.00305
All	Quantile 2	GO:0010050	vegetative phase change	245	63.69	85	0.00313
All	Quantile 2	GO:0007169	transmembrane receptor protein tyrosine kinase signaling pathway	1566	407.1	455	0.00317
All	Quantile 2	GO:0008380	RNA splicing	1453	377.72	450	0.0032
All	Quantile 2	GO:0051646	mitochondrion localization	85	22.1	35	0.00336
All	Quantile 2	GO:0055069	zinc ion homeostasis	173	44.97	63	0.00339
All	Quantile 2	GO:0051645	Golgi localization	79	20.54	32	0.00341
All	Quantile 2	GO:0060151	peroxisome localization	79	20.54	32	0.00341
All	Quantile 2	GO:0051604	protein maturation	577	150	186	0.00349
All	Quantile 2	GO:0006891	intra-Golgi vesicle-mediated transport	269	69.93	94	0.00351
All	Quantile 2	GO:0045857	negative regulation of molecular function, epigenetic	12	3.12	8	0.00363
All	Quantile 2	GO:0048314	embryo sac morphogenesis	12	3.12	8	0.00363
All	Quantile 2	GO:0071158	positive regulation of cell cycle arrest	12	3.12	8	0.00363
All	Quantile 2	GO:0009060	aerobic respiration	412	107.1	139	0.00369
All	Quantile 2	GO:0042793	plastid transcription	215	55.89	74	0.00376
All	Quantile 2	GO:0006268	DNA unwinding involved in DNA replication	44	11.44	20	0.00412
All	Quantile 2	GO:0030244	cellulose biosynthetic process	1127	292.97	333	0.00432
All	Quantile 2	GO:0009245	lipid A biosynthetic process	33	8.58	16	0.00455
All	Quantile 2	GO:0009749	response to glucose	1219	316.89	366	0.0046
All	Quantile 2	GO:0000160	phosphorelay signal transduction system	1884	489.76	484	0.00463
All	Quantile 2	GO:0023014	signal transduction by protein phosphorylation	1419	368.88	388	0.00468
All	Quantile 2	GO:0009639	response to red or far red light	3680	956.65	887	0.00472
All	Quantile 2	GO:0016310	phosphorylation	10020	2604.79	2804	0.00478
All	Quantile 2	GO:0006913	nucleocytoplasmic transport	851	221.22	249	0.00483
All	Quantile 2	GO:0035196	production of miRNAs involved in gene silencing by miRNA	500	129.98	156	0.00486
All	Quantile 2	GO:0006888	ER to Golgi vesicle-mediated transport	469	121.92	148	0.00491
All	Quantile 2	GO:0006486	protein glycosylation	882	229.28	291	0.00501
All	Quantile 2	GO:0009793	embryo development ending in seed dormancy	4164	1082.47	1174	0.00516
All	Quantile 2	GO:0044772	mitotic cell cycle phase transition	374	97.22	133	0.00518
All	Quantile 2	GO:0048507	meristem development	3561	925.71	1014	0.00525
All	Quantile 2	GO:0010501	RNA secondary structure unwinding	171	44.45	60	0.00527
All	Quantile 2	GO:0006281	DNA repair	2006	521.48	557	0.00543
All	Quantile 2	GO:0006344	maintenance of chromatin silencing	28	7.28	14	0.00553
All	Quantile 2	GO:0051726	regulation of cell cycle	1308	340.03	403	0.00554
All	Quantile 2	GO:0010271	regulation of chlorophyll catabolic process	21	5.46	12	0.00556
All	Quantile 2	GO:0006042	glucosamine biosynthetic process	6	1.56	5	0.00558
All	Quantile 2	GO:0045717	negative regulation of fatty acid biosynthetic process	6	1.56	5	0.00558
All	Quantile 2	GO:0071332	cellular response to fructose stimulus	6	1.56	5	0.00558
All	Quantile 2	GO:0071422	succinate transmembrane transport	6	1.56	5	0.00558
All	Quantile 2	GO:0080009	mRNA methylation	6	1.56	5	0.00558
All	Quantile 2	GO:0065004	protein-DNA complex assembly	563	146.36	134	0.0056
All	Quantile 2	GO:0015866	ADP transport	45	11.7	20	0.00562
All	Quantile 2	GO:0010072	primary shoot apical meristem specification	155	40.29	55	0.00564
All	Quantile 2	GO:0000184	nuclear-transcribed mRNA catabolic process, nonsense-mediated decay	63	16.38	26	0.00591
All	Quantile 2	GO:0006955	immune response	12363	3213.87	3200	0.006
All	Quantile 2	GO:0051601	exocyst localization	23	5.98	12	0.00652
All	Quantile 2	GO:0006661	phosphatidylinositol biosynthetic process	390	101.38	125	0.00672
All	Quantile 2	GO:0006284	base-excision repair	108	28.08	39	0.00694
All	Quantile 2	GO:0046713	borate transport	337	87.61	109	0.00701
All	Quantile 2	GO:0009556	microsporogenesis	807	209.79	241	0.0072
All	Quantile 2	GO:0051775	response to redox state	31	8.06	14	0.0073
All	Quantile 2	GO:0071329	cellular response to sucrose stimulus	44	11.44	18	0.00742
All	Quantile 2	GO:0008033	tRNA processing	373	96.96	126	0.00755
All	Quantile 2	GO:0010073	meristem maintenance	2472	642.62	713	0.00779
All	Quantile 2	GO:0010228	vegetative to reproductive phase transition of meristem	2198	571.39	634	0.00782
All	Quantile 2	GO:0016050	vesicle organization	253	65.77	86	0.00874
All	Quantile 2	GO:0046836	glycolipid transport	21	5.46	11	0.00878
All	Quantile 2	GO:0009934	regulation of meristem structural organization	735	191.07	220	0.00884
All	Quantile 2	GO:0009817	defense response to fungus, incompatible interaction	1030	267.76	301	0.00891
All	Quantile 2	GO:0009553	embryo sac development	2643	687.07	761	0.009
All	Quantile 2	GO:1901141	regulation of lignin biosynthetic process	176	45.75	45	0.00909
All	Quantile 2	GO:0007018	microtubule-based movement	212	55.11	71	0.00911
All	Quantile 2	GO:0016458	gene silencing	1737	451.55	565	0.00915
All	Quantile 2	GO:0016485	protein processing	247	64.21	81	0.00922
All	Quantile 2	GO:0042344	indole glucosinolate catabolic process	90	23.4	34	0.00927
All	Quantile 2	GO:0006741	NADP biosynthetic process	11	2.86	7	0.00951
All	Quantile 2	GO:0008333	endosome to lysosome transport	11	2.86	7	0.00951
All	Quantile 2	GO:0032790	ribosome disassembly	11	2.86	7	0.00951
All	Quantile 2	GO:0010359	regulation of anion channel activity	887	230.58	269	0.00954
All	Quantile 2	GO:0051321	meiotic cell cycle	1703	442.71	531	0.00956
All	Quantile 2	GO:0015860	purine nucleoside transmembrane transport	44	11.44	19	0.00991
All	Quantile 2	GO:0019538	protein metabolic process	23328	6064.32	6466	0.00992
All	Quantile 2	GO:0006665	sphingolipid metabolic process	313	81.37	92	0.00996
All	Quantile 2	GO:0032482	Rab protein signal transduction	97	25.22	36	0.01038
All	Quantile 2	GO:0006357	regulation of transcription by RNA polymerase II	854	222	251	0.01039
All	Quantile 2	GO:0006084	acetyl-CoA metabolic process	333	86.57	110	0.01041
All	Quantile 2	GO:0010027	thylakoid membrane organization	727	188.99	217	0.01048
All	Quantile 2	GO:0006415	translational termination	62	16.12	24	0.01095
All	Quantile 2	GO:0030154	cell differentiation	7283	1893.28	1999	0.0114
All	Quantile 2	GO:0048443	stamen development	2278	592.19	572	0.0114
All	Quantile 2	GO:1900459	positive regulation of brassinosteroid mediated signaling pathway	546	141.94	166	0.01142
All	Quantile 2	GO:0000712	resolution of meiotic recombination intermediates	30	7.8	14	0.01169
All	Quantile 2	GO:0006839	mitochondrial transport	590	153.38	182	0.01173
All	Quantile 2	GO:0031935	regulation of chromatin silencing	61	15.86	25	0.01185
All	Quantile 2	GO:0043171	peptide catabolic process	40	10.4	19	0.01185
All	Quantile 2	GO:0070192	chromosome organization involved in meiotic cell cycle	364	94.62	119	0.01217
All	Quantile 2	GO:0000917	division septum assembly	15	3.9	9	0.01222
All	Quantile 2	GO:0010366	negative regulation of ethylene biosynthetic process	9	2.34	6	0.01223
All	Quantile 2	GO:0035280	miRNA loading onto RISC involved in gene silencing by miRNA	9	2.34	6	0.01223
All	Quantile 2	GO:0051127	positive regulation of actin nucleation	9	2.34	6	0.01223
All	Quantile 2	GO:0071596	ubiquitin-dependent protein catabolic process via the N-end rule pathway	9	2.34	6	0.01223
All	Quantile 2	GO:0090351	seedling development	2052	533.44	559	0.01242
All	Quantile 2	GO:0006777	Mo-molybdopterin cofactor biosynthetic process	36	9.36	16	0.01262
All	Quantile 2	GO:0000398	mRNA splicing, via spliceosome	656	170.53	200	0.01297
All	Quantile 2	GO:0009610	response to symbiotic fungus	344	89.43	109	0.01298
All	Quantile 2	GO:0010468	regulation of gene expression	13974	3632.66	3793	0.01302
All	Quantile 2	GO:0010204	defense response signaling pathway, resistance gene-independent	792	205.89	234	0.01309
All	Quantile 2	GO:0042176	regulation of protein catabolic process	405	105.28	122	0.01344
All	Quantile 2	GO:0016571	histone methylation	1105	287.25	376	0.01347
All	Quantile 2	GO:0016099	monoterpenoid biosynthetic process	22	5.72	11	0.01349
All	Quantile 2	GO:0035344	hypoxanthine transport	22	5.72	11	0.01349
All	Quantile 2	GO:0098702	adenine import across plasma membrane	22	5.72	11	0.01349
All	Quantile 2	GO:0098710	guanine import across plasma membrane	22	5.72	11	0.01349
All	Quantile 2	GO:0098721	uracil import across plasma membrane	22	5.72	11	0.01349
All	Quantile 2	GO:0080188	RNA-directed DNA methylation	105	27.3	38	0.0135
All	Quantile 2	GO:0009910	negative regulation of flower development	168	43.67	57	0.01421
All	Quantile 2	GO:0042335	cuticle development	1022	265.68	300	0.01425
All	Quantile 2	GO:0071805	potassium ion transmembrane transport	489	127.12	151	0.01426
All	Quantile 2	GO:0001887	selenium compound metabolic process	25	6.5	12	0.01474
All	Quantile 2	GO:0000303	response to superoxide	220	57.19	71	0.01487
All	Quantile 2	GO:0019252	starch biosynthetic process	737	191.59	221	0.01504
All	Quantile 2	GO:0045595	regulation of cell differentiation	730	189.77	198	0.01508
All	Quantile 2	GO:0006409	tRNA export from nucleus	9	2.34	6	0.01533
All	Quantile 2	GO:0046901	tetrahydrofolylpolyglutamate biosynthetic process	7	1.82	5	0.01533
All	Quantile 2	GO:0010268	brassinosteroid homeostasis	759	197.31	224	0.01559
All	Quantile 2	GO:0010069	zygote asymmetric cytokinesis in embryo sac	17	4.42	9	0.01607
All	Quantile 2	GO:0016049	cell growth	5203	1352.57	1390	0.01613
All	Quantile 2	GO:0006007	glucose catabolic process	335	87.09	105	0.01616
All	Quantile 2	GO:0007029	endoplasmic reticulum organization	83	21.58	32	0.01641
All	Quantile 2	GO:0033500	carbohydrate homeostasis	155	40.29	56	0.01663
All	Quantile 2	GO:0048317	seed morphogenesis	49	12.74	20	0.0167
All	Quantile 2	GO:0048439	flower morphogenesis	251	65.25	81	0.01687
All	Quantile 2	GO:0009152	purine ribonucleotide biosynthetic process	2228	579.19	662	0.01737
All	Quantile 2	GO:0046777	protein autophosphorylation	3189	829.01	881	0.01746
All	Quantile 2	GO:0010101	post-embryonic root morphogenesis	1409	366.28	404	0.01748
All	Quantile 2	GO:0042558	pteridine-containing compound metabolic process	102	26.52	37	0.01755
All	Quantile 2	GO:0030149	sphingolipid catabolic process	55	14.3	22	0.01755
All	Quantile 2	GO:0090480	purine nucleotide-sugar transmembrane transport	47	12.22	19	0.01755
All	Quantile 2	GO:0008053	mitochondrial fusion	6	1.56	5	0.01756
All	Quantile 2	GO:0034982	mitochondrial protein processing	30	7.8	11	0.01756
All	Quantile 2	GO:1903427	negative regulation of reactive oxygen species biosynthetic process	6	1.56	4	0.01757
All	Quantile 2	GO:0006337	nucleosome disassembly	3	0.78	3	0.01757
All	Quantile 2	GO:0006761	dihydrofolate biosynthetic process	3	0.78	3	0.01757
All	Quantile 2	GO:0015015	heparan sulfate proteoglycan biosynthetic process, enzymatic modification	3	0.78	3	0.01757
All	Quantile 2	GO:0015741	fumarate transport	3	0.78	3	0.01757
All	Quantile 2	GO:0034184	positive regulation of maintenance of mitotic sister chromatid cohesion	3	0.78	3	0.01757
All	Quantile 2	GO:0042908	xenobiotic transport	3	0.78	3	0.01757
All	Quantile 2	GO:0042966	biotin carboxyl carrier protein biosynthetic process	3	0.78	3	0.01757
All	Quantile 2	GO:0060250	germ-line stem-cell niche homeostasis	3	0.78	3	0.01757
All	Quantile 2	GO:0071951	conversion of methionyl-tRNA to N-formyl-methionyl-tRNA	3	0.78	3	0.01757
All	Quantile 2	GO:0090392	sepal giant cell differentiation	3	0.78	3	0.01757
All	Quantile 2	GO:0097264	self proteolysis	3	0.78	3	0.01757
All	Quantile 2	GO:1901355	response to rapamycin	3	0.78	3	0.01757
All	Quantile 2	GO:1902661	positive regulation of glucose mediated signaling pathway	3	0.78	3	0.01757
All	Quantile 2	GO:1904874	positive regulation of telomerase RNA localization to Cajal body	3	0.78	3	0.01757
All	Quantile 2	GO:1904960	positive regulation of cytochrome-c oxidase activity	3	0.78	3	0.01757
All	Quantile 2	GO:1905157	positive regulation of photosynthesis	3	0.78	3	0.01757
All	Quantile 2	GO:1990426	mitotic recombination-dependent replication fork processing	3	0.78	3	0.01757
All	Quantile 2	GO:2000145	regulation of cell motility	3	0.78	3	0.01757
All	Quantile 2	GO:2000234	positive regulation of rRNA processing	3	0.78	3	0.01757
All	Quantile 2	GO:2000541	positive regulation of protein geranylgeranylation	3	0.78	3	0.01757
All	Quantile 2	GO:0006611	protein export from nucleus	360	93.59	106	0.01769
All	Quantile 2	GO:0051693	actin filament capping	64	16.64	21	0.01773
All	Quantile 2	GO:0019481	L-alanine catabolic process, by transamination	12	3.12	7	0.01773
All	Quantile 2	GO:0045041	protein import into mitochondrial intermembrane space	12	3.12	7	0.01773
All	Quantile 2	GO:0048569	post-embryonic animal organ development	12	3.12	7	0.01773
All	Quantile 2	GO:0051639	actin filament network formation	12	3.12	7	0.01773
All	Quantile 2	GO:1902459	positive regulation of stem cell population maintenance	12	3.12	7	0.01773
All	Quantile 2	GO:0009880	embryonic pattern specification	804	209.01	241	0.01774
All	Quantile 2	GO:0000730	DNA recombinase assembly	34	8.84	10	0.01774
All	Quantile 2	GO:0052541	plant-type cell wall cellulose metabolic process	89	23.14	33	0.01787
All	Quantile 2	GO:0048441	petal development	388	100.86	121	0.0179
All	Quantile 2	GO:0018283	iron incorporation into metallo-sulfur cluster	5	1.3	4	0.01808
All	Quantile 2	GO:0070370	cellular heat acclimation	722	187.69	213	0.01819
All	Quantile 2	GO:0048645	animal organ formation	807	209.79	229	0.01827
All	Quantile 2	GO:0090279	regulation of calcium ion import	20	5.2	10	0.01827
All	Quantile 2	GO:0071474	cellular hyperosmotic response	325	84.49	62	0.01844
All	Quantile 2	GO:0010216	maintenance of DNA methylation	65	16.9	25	0.01847
All	Quantile 2	GO:0052546	cell wall pectin metabolic process	203	52.77	66	0.01864
All	Quantile 2	GO:0010638	positive regulation of organelle organization	670	174.17	233	0.01884
All	Quantile 2	GO:0031047	gene silencing by RNA	1268	329.63	422	0.01936
All	Quantile 2	GO:0048838	release of seed from dormancy	59	15.34	23	0.01962
All	Quantile 2	GO:0046185	aldehyde catabolic process	285	74.09	104	0.01971
All	Quantile 2	GO:0006499	N-terminal protein myristoylation	355	92.29	110	0.01977
All	Quantile 2	GO:0043085	positive regulation of catalytic activity	867	225.38	258	0.01986
All	Quantile 2	GO:0009650	UV protection	677	175.99	200	0.02032
All	Quantile 2	GO:0000394	RNA splicing, via endonucleolytic cleavage and ligation	528	137.26	160	0.02072
All	Quantile 2	GO:0000381	regulation of alternative mRNA splicing, via spliceosome	26	6.76	12	0.02101
All	Quantile 2	GO:0010424	DNA methylation on cytosine within a CG sequence	26	6.76	12	0.02101
All	Quantile 2	GO:0019676	ammonia assimilation cycle	26	6.76	12	0.02101
All	Quantile 2	GO:0051205	protein insertion into membrane	35	9.1	13	0.02102
All	Quantile 2	GO:0001510	RNA methylation	759	197.31	234	0.02118
All	Quantile 2	GO:0060321	acceptance of pollen	29	7.54	13	0.02175
All	Quantile 2	GO:0033356	UDP-L-arabinose metabolic process	31	8.06	15	0.02185
All	Quantile 2	GO:0044210	'de novo' CTP biosynthetic process	15	3.9	8	0.02187
All	Quantile 2	GO:0046208	spermine catabolic process	15	3.9	8	0.02187
All	Quantile 2	GO:0016120	carotene biosynthetic process	35	9.1	15	0.02238
All	Quantile 2	GO:0010267	production of ta-siRNAs involved in RNA interference	392	101.9	120	0.02248
All	Quantile 2	GO:0016556	mRNA modification	479	124.52	156	0.02248
All	Quantile 2	GO:0006182	cGMP biosynthetic process	553	143.76	165	0.02297
All	Quantile 2	GO:0010090	trichome morphogenesis	637	165.59	191	0.02339
All	Quantile 2	GO:0006900	vesicle budding from membrane	67	17.42	23	0.02388
All	Quantile 2	GO:0034508	centromere complex assembly	27	7.02	11	0.02389
All	Quantile 2	GO:0051502	diterpene phytoalexin biosynthetic process	19	4.94	8	0.02389
All	Quantile 2	GO:0007267	cell-cell signaling	348	90.47	103	0.02395
All	Quantile 2	GO:0010380	regulation of chlorophyll biosynthetic process	108	28.08	39	0.02477
All	Quantile 2	GO:0090063	positive regulation of microtubule nucleation	18	4.68	9	0.02485
All	Quantile 2	GO:0002221	pattern recognition receptor signaling pathway	547	142.2	163	0.02501
All	Quantile 2	GO:0010068	protoderm histogenesis	641	166.63	189	0.02515
All	Quantile 2	GO:0000226	microtubule cytoskeleton organization	1705	443.23	506	0.02526
All	Quantile 2	GO:0015031	protein transport	5098	1325.27	1476	0.02544
All	Quantile 2	GO:0070588	calcium ion transmembrane transport	187	48.61	61	0.02558
All	Quantile 2	GO:0009116	nucleoside metabolic process	329	85.53	106	0.02558
All	Quantile 2	GO:0019827	stem cell population maintenance	381	99.04	126	0.02597
All	Quantile 2	GO:0009945	radial axis specification	638	165.85	188	0.02604
All	Quantile 2	GO:0051017	actin filament bundle assembly	70	18.2	26	0.02624
All	Quantile 2	GO:0009942	longitudinal axis specification	678	176.25	199	0.02632
All	Quantile 2	GO:2000027	regulation of animal organ morphogenesis	737	191.59	205	0.02699
All	Quantile 2	GO:0045944	positive regulation of transcription by RNA polymerase II	335	87.09	100	0.02715
All	Quantile 2	GO:0030155	regulation of cell adhesion	646	167.93	190	0.02719
All	Quantile 2	GO:0042545	cell wall modification	3014	783.52	756	0.02734
All	Quantile 2	GO:0045851	pH reduction	700	181.97	206	0.02773
All	Quantile 2	GO:0009851	auxin biosynthetic process	1168	303.63	291	0.02795
All	Quantile 2	GO:0010584	pollen exine formation	1521	395.4	402	0.02816
All	Quantile 2	GO:0032922	circadian regulation of gene expression	24	6.24	11	0.02825
All	Quantile 2	GO:0010045	response to nickel cation	618	160.65	173	0.02862
All	Quantile 2	GO:0010332	response to gamma radiation	417	108.4	129	0.02878
All	Quantile 2	GO:0006075	(1->3)-beta-D-glucan biosynthetic process	42	10.92	18	0.02898
All	Quantile 2	GO:0034051	negative regulation of plant-type hypersensitive response	27	7.02	12	0.02905
All	Quantile 2	GO:0006282	regulation of DNA repair	63	16.38	18	0.02909
All	Quantile 2	GO:0048440	carpel development	1719	446.87	516	0.02939
All	Quantile 2	GO:0006085	acetyl-CoA biosynthetic process	76	19.76	27	0.02942
All	Quantile 2	GO:0006302	double-strand break repair	941	244.62	240	0.02943
All	Quantile 2	GO:0010107	potassium ion import	184	47.83	61	0.02943
All	Quantile 2	GO:0006890	retrograde vesicle-mediated transport, Golgi to ER	61	15.86	23	0.02947
All	Quantile 2	GO:0080165	callose deposition in phloem sieve plate	33	8.58	14	0.02951
All	Quantile 2	GO:0010148	transpiration	691	179.63	202	0.02953
All	Quantile 2	GO:0009156	ribonucleoside monophosphate biosynthetic process	1523	395.92	449	0.02954
All	Quantile 2	GO:0002764	immune response-regulating signaling pathway	560	145.58	170	0.02975
All	Quantile 2	GO:0006468	protein phosphorylation	7806	2029.24	2151	0.02978
All	Quantile 2	GO:0019674	NAD metabolic process	53	13.78	21	0.02988
All	Quantile 2	GO:0009663	plasmodesma organization	13	3.38	7	0.0299
All	Quantile 2	GO:2001295	malonyl-CoA biosynthetic process	13	3.38	7	0.0299
All	Quantile 2	GO:0009616	virus induced gene silencing	654	170.01	194	0.02993
All	Quantile 2	GO:1900140	regulation of seedling development	1120	291.15	300	0.03036
All	Quantile 2	GO:0090503	RNA phosphodiester bond hydrolysis, exonucleolytic	75	19.5	27	0.03057
All	Quantile 2	GO:0007129	synapsis	325	84.49	101	0.03115
All	Quantile 2	GO:0006898	receptor-mediated endocytosis	698	181.45	209	0.03154
All	Quantile 2	GO:0006760	folic acid-containing compound metabolic process	93	24.18	32	0.03214
All	Quantile 2	GO:0034635	glutathione transport	15	3.9	7	0.03217
All	Quantile 2	GO:0000494	box C/D snoRNA 3'-end processing	8	2.08	5	0.03217
All	Quantile 2	GO:0006953	acute-phase response	8	2.08	5	0.03217
All	Quantile 2	GO:0030322	stabilization of membrane potential	8	2.08	5	0.03217
All	Quantile 2	GO:1990258	histone glutamine methylation	8	2.08	5	0.03217
All	Quantile 2	GO:0006897	endocytosis	955	248.26	290	0.03255
All	Quantile 2	GO:0007172	signal complex assembly	635	165.07	186	0.03297
All	Quantile 2	GO:0010234	anther wall tapetum cell fate specification	635	165.07	186	0.03297
All	Quantile 2	GO:0090548	response to nitrate starvation	635	165.07	186	0.03297
All	Quantile 2	GO:1901528	hydrogen peroxide mediated signaling pathway involved in stomatal movement	635	165.07	186	0.03297
All	Quantile 2	GO:1902025	nitrate import	635	165.07	186	0.03297
All	Quantile 2	GO:2000604	negative regulation of secondary growth	635	165.07	186	0.03297
All	Quantile 2	GO:0010540	basipetal auxin transport	138	35.87	46	0.03314
All	Quantile 2	GO:0010265	SCF complex assembly	16	4.16	8	0.03394
All	Quantile 2	GO:0016560	protein import into peroxisome matrix, docking	16	4.16	8	0.03394
All	Quantile 2	GO:0019593	mannitol biosynthetic process	16	4.16	8	0.03394
All	Quantile 2	GO:0051013	microtubule severing	16	4.16	8	0.03394
All	Quantile 2	GO:0010093	specification of floral organ identity	150	38.99	52	0.03471
All	Quantile 2	GO:0019745	pentacyclic triterpenoid biosynthetic process	135	35.09	45	0.03478
All	Quantile 2	GO:0009736	cytokinin-activated signaling pathway	418	108.66	125	0.03485
All	Quantile 2	GO:0070988	demethylation	126	32.75	41	0.03495
All	Quantile 2	GO:0048657	anther wall tapetum cell differentiation	697	181.19	209	0.03525
All	Quantile 2	GO:0030007	cellular potassium ion homeostasis	166	43.15	54	0.03563
All	Quantile 2	GO:0010116	positive regulation of abscisic acid biosynthetic process	75	19.5	27	0.03567
All	Quantile 2	GO:0030036	actin cytoskeleton organization	662	172.09	216	0.03594
All	Quantile 2	GO:0035556	intracellular signal transduction	5138	1335.67	1386	0.03621
All	Quantile 2	GO:0051302	regulation of cell division	941	244.62	266	0.0364
All	Quantile 2	GO:0009649	entrainment of circadian clock	29	7.54	17	0.03648
All	Quantile 2	GO:0043066	negative regulation of apoptotic process	19	4.94	9	0.03653
All	Quantile 2	GO:0009956	radial pattern formation	778	202.25	222	0.03687
All	Quantile 2	GO:0010305	leaf vascular tissue pattern formation	1003	260.74	286	0.03742
All	Quantile 2	GO:0010480	microsporocyte differentiation	641	166.63	187	0.03745
All	Quantile 2	GO:1901529	positive regulation of anion channel activity	641	166.63	187	0.03745
All	Quantile 2	GO:0006207	'de novo' pyrimidine nucleobase biosynthetic process	37	9.62	15	0.03778
All	Quantile 2	GO:0071217	cellular response to external biotic stimulus	22	5.72	10	0.03808
All	Quantile 2	GO:0071786	endoplasmic reticulum tubular network organization	22	5.72	10	0.03808
All	Quantile 2	GO:0045324	late endosome to vacuole transport	50	13	17	0.03848
All	Quantile 2	GO:0006855	drug transmembrane transport	519	134.92	159	0.03859
All	Quantile 2	GO:0000023	maltose metabolic process	531	138.04	157	0.03866
All	Quantile 2	GO:0045040	protein import into mitochondrial outer membrane	31	8.06	13	0.03893
All	Quantile 2	GO:0009908	flower development	6564	1706.37	1784	0.03915
All	Quantile 2	GO:0010025	wax biosynthetic process	366	95.14	110	0.03952
All	Quantile 2	GO:0015994	chlorophyll metabolic process	798	207.45	243	0.03963
All	Quantile 2	GO:0043407	negative regulation of MAP kinase activity	97	25.22	30	0.04018
All	Quantile 2	GO:0006367	transcription initiation from RNA polymerase II promoter	158	41.07	51	0.04038
All	Quantile 2	GO:0006103	2-oxoglutarate metabolic process	11	2.86	6	0.04115
All	Quantile 2	GO:0006540	glutamate decarboxylation to succinate	11	2.86	6	0.04115
All	Quantile 2	GO:0009450	gamma-aminobutyric acid catabolic process	11	2.86	6	0.04115
All	Quantile 2	GO:0010275	NAD(P)H dehydrogenase complex assembly	11	2.86	6	0.04115
All	Quantile 2	GO:0010581	regulation of starch biosynthetic process	11	2.86	6	0.04115
All	Quantile 2	GO:0050687	negative regulation of defense response to virus	11	2.86	6	0.04115
All	Quantile 2	GO:0048281	inflorescence morphogenesis	678	176.25	199	0.04115
All	Quantile 2	GO:0032502	developmental process	24188	6287.88	6508	0.04175
All	Quantile 2	GO:0007155	cell adhesion	1372	356.66	390	0.04189
All	Quantile 2	GO:0010067	procambium histogenesis	665	172.87	193	0.04191
All	Quantile 2	GO:0051171	regulation of nitrogen compound metabolic process	14843	3858.57	3948	0.04237
All	Quantile 2	GO:0048193	Golgi vesicle transport	1308	340.03	421	0.0425
All	Quantile 2	GO:0034968	histone lysine methylation	934	242.8	315	0.04259
All	Quantile 2	GO:1905393	plant organ formation	2582	671.21	722	0.04275
All	Quantile 2	GO:0001558	regulation of cell growth	1521	395.4	420	0.04299
All	Quantile 2	GO:0042853	L-alanine catabolic process	18	4.68	11	0.04306
All	Quantile 2	GO:0035493	SNARE complex assembly	15	3.9	9	0.04307
All	Quantile 2	GO:0043200	response to amino acid	331	86.05	89	0.04309
All	Quantile 2	GO:0009257	10-formyltetrahydrofolate biosynthetic process	6	1.56	4	0.04309
All	Quantile 2	GO:0010323	negative regulation of isopentenyl diphosphate biosynthetic process, methylerythritol 4-phosphate pathway	6	1.56	4	0.04309
All	Quantile 2	GO:0010729	positive regulation of hydrogen peroxide biosynthetic process	6	1.56	4	0.04309
All	Quantile 2	GO:0019878	lysine biosynthetic process via aminoadipic acid	6	1.56	4	0.04309
All	Quantile 2	GO:0035278	miRNA mediated inhibition of translation	6	1.56	4	0.04309
All	Quantile 2	GO:0040019	positive regulation of embryonic development	6	1.56	4	0.04309
All	Quantile 2	GO:0042149	cellular response to glucose starvation	6	1.56	4	0.04309
All	Quantile 2	GO:0048211	Golgi vesicle docking	6	1.56	4	0.04309
All	Quantile 2	GO:0048283	indeterminate inflorescence morphogenesis	6	1.56	4	0.04309
All	Quantile 2	GO:0070455	positive regulation of heme biosynthetic process	6	1.56	4	0.04309
All	Quantile 2	GO:0071578	zinc ion import across plasma membrane	6	1.56	4	0.04309
All	Quantile 2	GO:0071586	CAAX-box protein processing	6	1.56	4	0.04309
All	Quantile 2	GO:0090156	cellular sphingolipid homeostasis	6	1.56	4	0.04309
All	Quantile 2	GO:0090359	negative regulation of abscisic acid biosynthetic process	6	1.56	4	0.04309
All	Quantile 2	GO:0097250	mitochondrial respiratory chain supercomplex assembly	6	1.56	4	0.04309
All	Quantile 2	GO:2000025	regulation of leaf formation	6	1.56	4	0.04309
All	Quantile 2	GO:0015714	phosphoenolpyruvate transport	18	4.68	7	0.04309
All	Quantile 2	GO:0001708	cell fate specification	1066	277.12	320	0.0431
All	Quantile 2	GO:0046459	short-chain fatty acid metabolic process	40	10.4	11	0.0431
All	Quantile 2	GO:0015755	fructose transmembrane transport	70	18.2	17	0.04312
All	Quantile 2	GO:0000060	protein import into nucleus, translocation	47	12.22	18	0.04329
All	Quantile 2	GO:0007584	response to nutrient	375	97.48	95	0.04359
All	Quantile 2	GO:0072583	clathrin-dependent endocytosis	60	15.6	22	0.04459
All	Quantile 2	GO:0009753	response to jasmonic acid	3963	1030.22	1047	0.04465
All	Quantile 2	GO:0060548	negative regulation of cell death	1481	385	412	0.04473
All	Quantile 2	GO:0009729	detection of brassinosteroid stimulus	659	171.31	191	0.04474
All	Quantile 2	GO:0031627	telomeric loop formation	44	11.44	17	0.04485
All	Quantile 2	GO:0048366	leaf development	4388	1140.7	1149	0.04497
All	Quantile 2	GO:1902358	sulfate transmembrane transport	41	10.66	16	0.04637
All	Quantile 2	GO:0051262	protein tetramerization	96	24.96	28	0.04664
All	Quantile 2	GO:0010152	pollen maturation	711	184.83	205	0.04675
All	Quantile 2	GO:0009845	seed germination	1986	516.28	533	0.04755
All	Quantile 2	GO:0009854	oxidative photosynthetic carbon pathway	38	9.88	15	0.04783
All	Quantile 2	GO:0010304	PSII associated light-harvesting complex II catabolic process	87	22.62	30	0.04911
All	Quantile 2	GO:0010255	glucose mediated signaling pathway	38	9.88	17	0.04915
All	Quantile 2	GO:0000737	DNA catabolic process, endonucleolytic	35	9.1	14	0.04919
All	Quantile 2	GO:0035066	positive regulation of histone acetylation	17	4.42	8	0.04982
All	Quantile 2	GO:0070932	histone H3 deacetylation	17	4.42	8	0.04982
All	Quantile 2	GO:0070933	histone H4 deacetylation	17	4.42	8	0.04982
A	Quantile 2	GO:0006635	fatty acid beta-oxidation	226	59.27	86	6.9e-05
A	Quantile 2	GO:0051788	response to misfolded protein	302	79.2	110	7e-05
A	Quantile 2	GO:0080129	proteasome core complex assembly	156	40.91	62	0.00015
A	Quantile 2	GO:0016558	protein import into peroxisome matrix	108	28.32	49	0.00015
A	Quantile 2	GO:0046854	phosphatidylinositol phosphorylation	47	12.33	24	0.00024
A	Quantile 2	GO:0000911	cytokinesis by cell plate formation	353	92.57	111	0.00068
A	Quantile 2	GO:0009846	pollen germination	391	102.54	131	0.00078
A	Quantile 2	GO:0007062	sister chromatid cohesion	167	43.8	62	0.00106
A	Quantile 2	GO:0031537	regulation of anthocyanin metabolic process	143	37.5	32	0.00121
A	Quantile 2	GO:0010430	fatty acid omega-oxidation	5	1.31	5	0.00124
A	Quantile 2	GO:0046202	cyanide biosynthetic process	5	1.31	5	0.00124
A	Quantile 2	GO:0006629	lipid metabolic process	2895	759.2	826	0.00144
A	Quantile 2	GO:0055069	zinc ion homeostasis	58	15.21	27	0.00188
A	Quantile 2	GO:0019243	methylglyoxal catabolic process to D-lactate via S-lactoyl-glutathione	82	21.5	34	0.00189
A	Quantile 2	GO:0072583	clathrin-dependent endocytosis	21	5.51	12	0.00262
A	Quantile 2	GO:0006357	regulation of transcription by RNA polymerase II	285	74.74	93	0.00263
A	Quantile 2	GO:0010082	regulation of root meristem growth	90	23.6	36	0.00297
A	Quantile 2	GO:0048366	leaf development	1431	375.27	379	0.00311
A	Quantile 2	GO:0016569	covalent chromatin modification	602	157.87	191	0.00315
A	Quantile 2	GO:0009853	photorespiration	201	52.71	73	0.00333
A	Quantile 2	GO:0010332	response to gamma radiation	144	37.76	55	0.00351
A	Quantile 2	GO:0006096	glycolytic process	341	89.43	112	0.00368
A	Quantile 2	GO:0042138	meiotic DNA double-strand break formation	101	26.49	39	0.00424
A	Quantile 2	GO:0006886	intracellular protein transport	1480	388.12	450	0.00433
A	Quantile 2	GO:0006811	ion transport	2702	708.59	727	0.00442
A	Quantile 2	GO:0009610	response to symbiotic fungus	120	31.47	46	0.00443
A	Quantile 2	GO:0042127	regulation of cell proliferation	405	106.21	118	0.00446
A	Quantile 2	GO:0015884	folic acid transport	4	1.05	4	0.00473
A	Quantile 2	GO:0070536	protein K63-linked deubiquitination	4	1.05	4	0.00473
A	Quantile 2	GO:0071108	protein K48-linked deubiquitination	4	1.05	4	0.00473
A	Quantile 2	GO:0006520	cellular amino acid metabolic process	1366	358.23	368	0.00473
A	Quantile 2	GO:0016925	protein sumoylation	34	8.92	17	0.00498
A	Quantile 2	GO:0010025	wax biosynthetic process	117	30.68	45	0.00499
A	Quantile 2	GO:0048443	stamen development	713	186.98	182	0.00515
A	Quantile 2	GO:0048481	plant ovule development	481	126.14	151	0.00578
A	Quantile 2	GO:0006893	Golgi to plasma membrane transport	7	1.84	6	0.00581
A	Quantile 2	GO:0016560	protein import into peroxisome matrix, docking	6	1.57	5	0.00581
A	Quantile 2	GO:0031627	telomeric loop formation	15	3.93	9	0.00592
A	Quantile 2	GO:0000394	RNA splicing, via endonucleolytic cleavage and ligation	176	46.16	62	0.00595
A	Quantile 2	GO:0006511	ubiquitin-dependent protein catabolic process	1031	270.38	313	0.00675
A	Quantile 2	GO:0043900	regulation of multi-organism process	642	168.36	174	0.00764
A	Quantile 2	GO:0000184	nuclear-transcribed mRNA catabolic process, nonsense-mediated decay	20	5.24	11	0.00779
A	Quantile 2	GO:0006094	gluconeogenesis	216	56.65	73	0.00799
A	Quantile 2	GO:0071805	potassium ion transmembrane transport	161	42.22	54	0.00799
A	Quantile 2	GO:0051645	Golgi localization	26	6.82	13	0.00801
A	Quantile 2	GO:0060151	peroxisome localization	26	6.82	13	0.00801
A	Quantile 2	GO:0006310	DNA recombination	480	125.88	140	0.0082
A	Quantile 2	GO:0032204	regulation of telomere maintenance	61	16	25	0.00846
A	Quantile 2	GO:0046686	response to cadmium ion	1033	270.9	304	0.00872
A	Quantile 2	GO:0007169	transmembrane receptor protein tyrosine kinase signaling pathway	497	130.34	154	0.00938
A	Quantile 2	GO:0016132	brassinosteroid biosynthetic process	209	54.81	70	0.00945
A	Quantile 2	GO:0001510	RNA methylation	251	65.82	84	0.00982
A	Quantile 2	GO:0009245	lipid A biosynthetic process	11	2.88	7	0.01
A	Quantile 2	GO:0006413	translational initiation	159	41.7	59	0.01013
A	Quantile 2	GO:0051646	mitochondrion localization	28	7.34	14	0.01179
A	Quantile 2	GO:0016310	phosphorylation	3288	862.26	958	0.01237
A	Quantile 2	GO:0007165	signal transduction	4933	1293.66	1273	0.01241
A	Quantile 2	GO:0009749	response to glucose	387	101.49	124	0.0126
A	Quantile 2	GO:1901679	nucleotide transmembrane transport	36	9.44	17	0.01261
A	Quantile 2	GO:0043447	alkane biosynthetic process	19	4.98	10	0.01263
A	Quantile 2	GO:0046185	aldehyde catabolic process	93	24.39	40	0.01268
A	Quantile 2	GO:0071329	cellular response to sucrose stimulus	16	4.2	8	0.01278
A	Quantile 2	GO:0006878	cellular copper ion homeostasis	9	2.36	6	0.01278
A	Quantile 2	GO:0032508	DNA duplex unwinding	53	13.9	22	0.01399
A	Quantile 2	GO:0052541	plant-type cell wall cellulose metabolic process	27	7.08	13	0.0144
A	Quantile 2	GO:0006468	protein phosphorylation	2543	666.89	717	0.01506
A	Quantile 2	GO:0019538	protein metabolic process	7612	1996.21	2159	0.01569
A	Quantile 2	GO:0002764	immune response-regulating signaling pathway	172	45.11	60	0.01582
A	Quantile 2	GO:0015914	phospholipid transport	27	7.08	10	0.01593
A	Quantile 2	GO:0009630	gravitropism	414	108.57	124	0.01594
A	Quantile 2	GO:0045132	meiotic chromosome segregation	189	49.56	64	0.01606
A	Quantile 2	GO:0051604	protein maturation	192	50.35	66	0.01644
A	Quantile 2	GO:0006882	cellular zinc ion homeostasis	40	10.49	16	0.01682
A	Quantile 2	GO:0070085	glycosylation	359	94.15	107	0.01795
A	Quantile 2	GO:0000086	G2/M transition of mitotic cell cycle	77	20.19	24	0.01802
A	Quantile 2	GO:0044090	positive regulation of vacuole organization	4	1.05	4	0.01802
A	Quantile 2	GO:0002143	tRNA wobble position uridine thiolation	3	0.79	3	0.01803
A	Quantile 2	GO:0015885	5-formyltetrahydrofolate transport	3	0.79	3	0.01803
A	Quantile 2	GO:0019918	peptidyl-arginine methylation, to symmetrical-dimethyl arginine	3	0.79	3	0.01803
A	Quantile 2	GO:0046902	regulation of mitochondrial membrane permeability	3	0.79	3	0.01803
A	Quantile 2	GO:0050687	negative regulation of defense response to virus	3	0.79	3	0.01803
A	Quantile 2	GO:0051958	methotrexate transport	3	0.79	3	0.01803
A	Quantile 2	GO:0070143	mitochondrial alanyl-tRNA aminoacylation	3	0.79	3	0.01803
A	Quantile 2	GO:0019673	GDP-mannose metabolic process	11	2.88	4	0.01804
A	Quantile 2	GO:0030091	protein repair	27	7.08	12	0.01859
A	Quantile 2	GO:0006222	UMP biosynthetic process	15	3.93	10	0.01865
A	Quantile 2	GO:0010069	zygote asymmetric cytokinesis in embryo sac	5	1.31	4	0.01868
A	Quantile 2	GO:0044206	UMP salvage	5	1.31	4	0.01868
A	Quantile 2	GO:0044211	CTP salvage	5	1.31	4	0.01868
A	Quantile 2	GO:0016579	protein deubiquitination	133	34.88	50	0.01877
A	Quantile 2	GO:0006626	protein targeting to mitochondrion	143	37.5	52	0.01924
A	Quantile 2	GO:0042147	retrograde transport, endosome to Golgi	21	5.51	11	0.01939
A	Quantile 2	GO:0048759	xylem vessel member cell differentiation	20	5.24	10	0.01941
A	Quantile 2	GO:0048364	root development	2009	526.85	564	0.0198
A	Quantile 2	GO:0009735	response to cytokinin	655	171.77	195	0.02038
A	Quantile 2	GO:0043161	proteasome-mediated ubiquitin-dependent protein catabolic process	530	138.99	157	0.02062
A	Quantile 2	GO:0016192	vesicle-mediated transport	1018	266.97	320	0.02064
A	Quantile 2	GO:0010050	vegetative phase change	84	22.03	31	0.02092
A	Quantile 2	GO:0016126	sterol biosynthetic process	205	53.76	66	0.02116
A	Quantile 2	GO:0006260	DNA replication	373	97.82	107	0.02211
A	Quantile 2	GO:0009108	coenzyme biosynthetic process	838	219.76	258	0.02284
A	Quantile 2	GO:1901140	p-coumaryl alcohol transport	15	3.93	8	0.02302
A	Quantile 2	GO:0071482	cellular response to light stimulus	226	59.27	54	0.0232
A	Quantile 2	GO:0042344	indole glucosinolate catabolic process	29	7.61	13	0.02331
A	Quantile 2	GO:0010311	lateral root formation	219	57.43	71	0.02367
A	Quantile 2	GO:0043266	regulation of potassium ion transport	65	17.05	20	0.02392
A	Quantile 2	GO:0009965	leaf morphogenesis	686	179.9	191	0.02415
A	Quantile 2	GO:0048441	petal development	124	32.52	39	0.02418
A	Quantile 2	GO:0006085	acetyl-CoA biosynthetic process	25	6.56	12	0.02488
A	Quantile 2	GO:0001560	regulation of cell growth by extracellular stimulus	10	2.62	6	0.02492
A	Quantile 2	GO:0009266	response to temperature stimulus	4166	1092.52	1062	0.02526
A	Quantile 2	GO:0009560	embryo sac egg cell differentiation	148	38.81	50	0.02584
A	Quantile 2	GO:0071366	cellular response to indolebutyric acid stimulus	18	4.72	9	0.02624
A	Quantile 2	GO:0015692	lead ion transport	21	5.51	10	0.0285
A	Quantile 2	GO:0010072	primary shoot apical meristem specification	51	13.37	20	0.02892
A	Quantile 2	GO:0010059	positive regulation of atrichoblast fate specification	83	21.77	30	0.02947
A	Quantile 2	GO:0010063	positive regulation of trichoblast fate specification	83	21.77	30	0.02947
A	Quantile 2	GO:0043547	positive regulation of GTPase activity	53	13.9	20	0.03028
A	Quantile 2	GO:0052546	cell wall pectin metabolic process	69	18.09	26	0.03087
A	Quantile 2	GO:0007164	establishment of tissue polarity	23	6.03	10	0.03129
A	Quantile 2	GO:0009854	oxidative photosynthetic carbon pathway	13	3.41	7	0.0313
A	Quantile 2	GO:0015867	ATP transport	13	3.41	7	0.0313
A	Quantile 2	GO:0051028	mRNA transport	131	34.35	41	0.0316
A	Quantile 2	GO:0006470	protein dephosphorylation	327	85.75	82	0.03207
A	Quantile 2	GO:0042176	regulation of protein catabolic process	115	30.16	35	0.03332
A	Quantile 2	GO:0006545	glycine biosynthetic process	8	2.1	5	0.03335
A	Quantile 2	GO:0030497	fatty acid elongation	8	2.1	5	0.03335
A	Quantile 2	GO:0048015	phosphatidylinositol-mediated signaling	8	2.1	5	0.03335
A	Quantile 2	GO:0051764	actin crosslink formation	8	2.1	5	0.03335
A	Quantile 2	GO:0009405	pathogenesis	58	15.21	22	0.03346
A	Quantile 2	GO:0031048	chromatin silencing by small RNA	139	36.45	47	0.03348
A	Quantile 2	GO:0006066	alcohol metabolic process	446	116.96	112	0.03351
A	Quantile 2	GO:0006099	tricarboxylic acid cycle	55	14.42	21	0.03459
A	Quantile 2	GO:0009793	embryo development ending in seed dormancy	1375	360.59	396	0.03488
A	Quantile 2	GO:0051321	meiotic cell cycle	552	144.76	171	0.03501
A	Quantile 2	GO:0008219	cell death	2311	606.05	605	0.0352
A	Quantile 2	GO:0006182	cGMP biosynthetic process	168	44.06	55	0.03525
A	Quantile 2	GO:0009220	pyrimidine ribonucleotide biosynthetic process	171	44.84	61	0.03563
A	Quantile 2	GO:0048317	seed morphogenesis	16	4.2	8	0.03564
A	Quantile 2	GO:0034968	histone lysine methylation	308	80.77	87	0.03611
A	Quantile 2	GO:0042335	cuticle development	331	86.8	104	0.03644
A	Quantile 2	GO:0010051	xylem and phloem pattern formation	444	116.44	134	0.03677
A	Quantile 2	GO:1900459	positive regulation of brassinosteroid mediated signaling pathway	165	43.27	54	0.03688
A	Quantile 2	GO:0000160	phosphorelay signal transduction system	608	159.45	166	0.03773
A	Quantile 2	GO:0000956	nuclear-transcribed mRNA catabolic process	166	43.53	66	0.03814
A	Quantile 2	GO:0031571	mitotic G1 DNA damage checkpoint	19	4.98	9	0.03849
A	Quantile 2	GO:0010071	root meristem specification	88	23.08	31	0.03869
A	Quantile 2	GO:0009960	endosperm development	337	88.38	104	0.03963
A	Quantile 2	GO:0006366	transcription by RNA polymerase II	371	97.29	119	0.03979
A	Quantile 2	GO:0019288	isopentenyl diphosphate biosynthetic process, methylerythritol 4-phosphate pathway	277	72.64	89	0.04017
A	Quantile 2	GO:0005978	glycogen biosynthetic process	22	5.77	10	0.04024
A	Quantile 2	GO:1901141	regulation of lignin biosynthetic process	56	14.69	16	0.04035
A	Quantile 2	GO:0016573	histone acetylation	69	18.09	26	0.04107
A	Quantile 2	GO:0006012	galactose metabolic process	32	8.39	14	0.04154
A	Quantile 2	GO:0010043	response to zinc ion	327	85.75	100	0.04268
A	Quantile 2	GO:0006887	exocytosis	117	30.68	40	0.04269
A	Quantile 2	GO:0030307	positive regulation of cell growth	17	4.46	8	0.04281
A	Quantile 2	GO:0006207	'de novo' pyrimidine nucleobase biosynthetic process	11	2.88	6	0.04282
A	Quantile 2	GO:0002221	pattern recognition receptor signaling pathway	165	43.27	55	0.04283
A	Quantile 2	GO:0035196	production of miRNAs involved in gene silencing by miRNA	172	45.11	57	0.04325
A	Quantile 2	GO:0006486	protein glycosylation	295	77.36	89	0.04327
A	Quantile 2	GO:0007010	cytoskeleton organization	855	224.22	250	0.04327
A	Quantile 2	GO:0007131	reciprocal meiotic recombination	179	46.94	57	0.04342
A	Quantile 2	GO:0006723	cuticle hydrocarbon biosynthetic process	6	1.57	4	0.04441
A	Quantile 2	GO:0007133	meiotic anaphase I	6	1.57	4	0.04441
A	Quantile 2	GO:0071480	cellular response to gamma radiation	6	1.57	4	0.04441
A	Quantile 2	GO:0090279	regulation of calcium ion import	6	1.57	4	0.04441
A	Quantile 2	GO:0071474	cellular hyperosmotic response	97	25.44	19	0.0446
A	Quantile 2	GO:0010540	basipetal auxin transport	47	12.33	18	0.04673
A	Quantile 2	GO:0006281	DNA repair	670	175.7	191	0.04721
A	Quantile 2	GO:0006499	N-terminal protein myristoylation	123	32.26	41	0.04768
A	Quantile 2	GO:0010045	response to nickel cation	190	49.83	56	0.04813
A	Quantile 2	GO:0010351	lithium ion transport	44	11.54	17	0.04828
A	Quantile 2	GO:0090502	RNA phosphodiester bond hydrolysis, endonucleolytic	113	29.63	36	0.04925
B	Quantile 2	GO:0006275	regulation of DNA replication	144	37.04	61	5.5e-06
B	Quantile 2	GO:0006346	methylation-dependent chromatin silencing	154	39.62	63	2.1e-05
B	Quantile 2	GO:0006487	protein N-linked glycosylation	135	34.73	55	2.7e-05
B	Quantile 2	GO:0006306	DNA methylation	232	59.68	94	4e-05
B	Quantile 2	GO:0009855	determination of bilateral symmetry	133	34.21	55	5.9e-05
B	Quantile 2	GO:0006261	DNA-dependent DNA replication	297	76.4	115	7.5e-05
B	Quantile 2	GO:0051567	histone H3-K9 methylation	228	58.65	88	7.8e-05
B	Quantile 2	GO:0016246	RNA interference	215	55.31	80	0.00012
B	Quantile 2	GO:0010014	meristem initiation	265	68.17	82	0.00013
B	Quantile 2	GO:0048193	Golgi vesicle transport	427	109.85	158	0.00016
B	Quantile 2	GO:0045010	actin nucleation	136	34.99	55	0.00026
B	Quantile 2	GO:0050665	hydrogen peroxide biosynthetic process	106	27.27	46	0.00028
B	Quantile 2	GO:0010076	maintenance of floral meristem identity	18	4.63	12	0.00031
B	Quantile 2	GO:0006396	RNA processing	1444	371.47	442	0.00047
B	Quantile 2	GO:0009887	animal organ morphogenesis	375	96.47	122	0.00056
B	Quantile 2	GO:0000956	nuclear-transcribed mRNA catabolic process	166	42.7	64	0.00076
B	Quantile 2	GO:0033044	regulation of chromosome organization	190	48.88	78	0.0009
B	Quantile 2	GO:0007030	Golgi organization	435	111.9	141	0.00099
B	Quantile 2	GO:0000278	mitotic cell cycle	732	188.31	221	0.00155
B	Quantile 2	GO:0010165	response to X-ray	12	3.09	8	0.00161
B	Quantile 2	GO:0010501	RNA secondary structure unwinding	56	14.41	25	0.00164
B	Quantile 2	GO:0006310	DNA recombination	540	138.92	166	0.00165
B	Quantile 2	GO:0009944	polarity specification of adaxial/abaxial axis	319	82.06	105	0.00236
B	Quantile 2	GO:0016458	gene silencing	589	151.52	206	0.00275
B	Quantile 2	GO:0016926	protein desumoylation	104	26.75	40	0.00287
B	Quantile 2	GO:0006349	regulation of gene expression by genetic imprinting	19	4.89	11	0.00292
B	Quantile 2	GO:0010389	regulation of G2/M transition of mitotic cell cycle	70	18.01	30	0.00296
B	Quantile 2	GO:0010073	meristem maintenance	815	209.66	242	0.00316
B	Quantile 2	GO:0045087	innate immune response	4043	1040.07	1059	0.00331
B	Quantile 2	GO:0009630	gravitropism	413	106.25	118	0.00345
B	Quantile 2	GO:0018106	peptidyl-histidine phosphorylation	17	4.37	10	0.00388
B	Quantile 2	GO:0046686	response to cadmium ion	1025	263.68	302	0.00407
B	Quantile 2	GO:0051574	positive regulation of histone H3-K9 methylation	19	4.89	9	0.00437
B	Quantile 2	GO:0032197	transposition, RNA-mediated	4	1.03	4	0.00438
B	Quantile 2	GO:0043153	entrainment of circadian clock by photoperiod	4	1.03	4	0.00438
B	Quantile 2	GO:0090241	negative regulation of histone H4 acetylation	4	1.03	4	0.00438
B	Quantile 2	GO:2001142	nicotinate transport	4	1.03	4	0.00438
B	Quantile 2	GO:2001143	N-methylnicotinate transport	4	1.03	4	0.00438
B	Quantile 2	GO:0007165	signal transduction	4978	1280.6	1278	0.0045
B	Quantile 2	GO:0016569	covalent chromatin modification	604	155.38	226	0.0045
B	Quantile 2	GO:0001172	transcription, RNA-templated	8	2.06	6	0.00493
B	Quantile 2	GO:0051601	exocyst localization	8	2.06	6	0.00493
B	Quantile 2	GO:0055047	generative cell mitosis	8	2.06	6	0.00493
B	Quantile 2	GO:0009957	epidermal cell fate specification	20	5.15	11	0.00499
B	Quantile 2	GO:0043087	regulation of GTPase activity	84	21.61	34	0.00543
B	Quantile 2	GO:0030244	cellulose biosynthetic process	363	93.38	116	0.0058
B	Quantile 2	GO:0009845	seed germination	653	167.99	193	0.00589
B	Quantile 2	GO:0019827	stem cell population maintenance	129	33.19	46	0.0059
B	Quantile 2	GO:0006007	glucose catabolic process	111	28.55	41	0.0059
B	Quantile 2	GO:0007131	reciprocal meiotic recombination	174	44.76	65	0.00597
B	Quantile 2	GO:0009560	embryo sac egg cell differentiation	134	34.47	49	0.00635
B	Quantile 2	GO:0071366	cellular response to indolebutyric acid stimulus	18	4.63	10	0.00673
B	Quantile 2	GO:1900366	negative regulation of defense response to insect	18	4.63	10	0.00673
B	Quantile 2	GO:1901140	p-coumaryl alcohol transport	18	4.63	10	0.00673
B	Quantile 2	GO:0006623	protein targeting to vacuole	165	42.45	57	0.00721
B	Quantile 2	GO:0010498	proteasomal protein catabolic process	710	182.65	199	0.0077
B	Quantile 2	GO:0000902	cell morphogenesis	1545	397.45	424	0.00786
B	Quantile 2	GO:0006099	tricarboxylic acid cycle	59	15.18	24	0.00848
B	Quantile 2	GO:0010043	response to zinc ion	364	93.64	116	0.00876
B	Quantile 2	GO:0032876	negative regulation of DNA endoreduplication	11	2.83	7	0.00893
B	Quantile 2	GO:0010077	maintenance of inflorescence meristem identity	16	4.12	9	0.0091
B	Quantile 2	GO:0032436	positive regulation of proteasomal ubiquitin-dependent protein catabolic process	28	7.2	13	0.00914
B	Quantile 2	GO:0006661	phosphatidylinositol biosynthetic process	131	33.7	45	0.00941
B	Quantile 2	GO:0048449	floral organ formation	411	105.73	140	0.00945
B	Quantile 2	GO:0009814	defense response, incompatible interaction	2695	693.29	701	0.00967
B	Quantile 2	GO:0007018	microtubule-based movement	69	17.75	27	0.00991
B	Quantile 2	GO:0016049	cell growth	1697	436.56	464	0.01073
B	Quantile 2	GO:0010051	xylem and phloem pattern formation	443	113.96	128	0.01077
B	Quantile 2	GO:0048446	petal morphogenesis	92	23.67	36	0.01097
B	Quantile 2	GO:0051028	mRNA transport	133	34.21	44	0.01101
B	Quantile 2	GO:0023014	signal transduction by protein phosphorylation	475	122.19	128	0.01107
B	Quantile 2	GO:0007267	cell-cell signaling	115	29.58	37	0.01188
B	Quantile 2	GO:0051301	cell division	1043	268.31	293	0.01265
B	Quantile 2	GO:0009266	response to temperature stimulus	4249	1093.06	1061	0.01315
B	Quantile 2	GO:0006891	intra-Golgi vesicle-mediated transport	87	22.38	36	0.01325
B	Quantile 2	GO:0001676	long-chain fatty acid metabolic process	38	9.78	15	0.01353
B	Quantile 2	GO:0048507	meristem development	1174	302.01	339	0.01377
B	Quantile 2	GO:0000023	maltose metabolic process	170	43.73	57	0.01397
B	Quantile 2	GO:0016197	endosomal transport	64	16.46	27	0.01423
B	Quantile 2	GO:0016050	vesicle organization	84	21.61	35	0.01453
B	Quantile 2	GO:0042593	glucose homeostasis	35	9	16	0.01459
B	Quantile 2	GO:0006399	tRNA metabolic process	275	70.74	89	0.01462
B	Quantile 2	GO:0010507	negative regulation of autophagy	7	1.8	5	0.01462
B	Quantile 2	GO:0030397	membrane disassembly	17	4.37	9	0.01498
B	Quantile 2	GO:0044030	regulation of DNA methylation	17	4.37	9	0.01498
B	Quantile 2	GO:0009616	virus induced gene silencing	220	56.6	73	0.01513
B	Quantile 2	GO:0080188	RNA-directed DNA methylation	34	8.75	15	0.01516
B	Quantile 2	GO:0009553	embryo sac development	889	228.7	269	0.01565
B	Quantile 2	GO:0001510	RNA methylation	251	64.57	85	0.0157
B	Quantile 2	GO:0007129	synapsis	108	27.78	40	0.01601
B	Quantile 2	GO:0006777	Mo-molybdopterin cofactor biosynthetic process	12	3.09	7	0.01671
B	Quantile 2	GO:0006281	DNA repair	710	182.65	192	0.01683
B	Quantile 2	GO:0009799	specification of symmetry	136	34.99	58	0.01687
B	Quantile 2	GO:0070192	chromosome organization involved in meiotic cell cycle	121	31.13	49	0.01691
B	Quantile 2	GO:0016104	triterpenoid biosynthetic process	50	12.86	17	0.01701
B	Quantile 2	GO:0000212	meiotic spindle organization	6	1.54	4	0.01702
B	Quantile 2	GO:0000913	preprophase band assembly	3	0.77	3	0.01702
B	Quantile 2	GO:0006953	acute-phase response	3	0.77	3	0.01702
B	Quantile 2	GO:0010366	negative regulation of ethylene biosynthetic process	3	0.77	3	0.01702
B	Quantile 2	GO:0030322	stabilization of membrane potential	3	0.77	3	0.01702
B	Quantile 2	GO:0051127	positive regulation of actin nucleation	3	0.77	3	0.01702
B	Quantile 2	GO:0071158	positive regulation of cell cycle arrest	3	0.77	3	0.01702
B	Quantile 2	GO:0009452	7-methylguanosine RNA capping	11	2.83	5	0.01702
B	Quantile 2	GO:0019252	starch biosynthetic process	238	61.23	78	0.01732
B	Quantile 2	GO:0000301	retrograde transport, vesicle recycling within Golgi	5	1.29	4	0.01738
B	Quantile 2	GO:0001927	exocyst assembly	5	1.29	4	0.01738
B	Quantile 2	GO:0090063	positive regulation of microtubule nucleation	5	1.29	4	0.01738
B	Quantile 2	GO:2001289	lipid X metabolic process	5	1.29	4	0.01738
B	Quantile 2	GO:0016579	protein deubiquitination	125	32.16	43	0.01741
B	Quantile 2	GO:0055065	metal ion homeostasis	699	179.82	179	0.01741
B	Quantile 2	GO:0007033	vacuole organization	115	29.58	41	0.01744
B	Quantile 2	GO:0035196	production of miRNAs involved in gene silencing by miRNA	160	41.16	52	0.01791
B	Quantile 2	GO:0009851	auxin biosynthetic process	385	99.04	97	0.01851
B	Quantile 2	GO:0009909	regulation of flower development	824	211.98	249	0.01855
B	Quantile 2	GO:0051726	regulation of cell cycle	432	111.13	147	0.01889
B	Quantile 2	GO:0007010	cytoskeleton organization	857	220.46	284	0.01892
B	Quantile 2	GO:0042344	indole glucosinolate catabolic process	29	7.46	13	0.01994
B	Quantile 2	GO:0009308	amine metabolic process	663	170.56	161	0.02028
B	Quantile 2	GO:0015860	purine nucleoside transmembrane transport	15	3.86	8	0.02052
B	Quantile 2	GO:0006270	DNA replication initiation	76	19.55	28	0.0211
B	Quantile 2	GO:0051225	spindle assembly	68	17.49	27	0.0221
B	Quantile 2	GO:0006094	gluconeogenesis	226	58.14	72	0.02235
B	Quantile 2	GO:0051775	response to redox state	11	2.83	7	0.02267
B	Quantile 2	GO:0045737	positive regulation of cyclin-dependent protein serine/threonine kinase activity	10	2.57	6	0.02268
B	Quantile 2	GO:0042545	cell wall modification	1005	258.54	255	0.02285
B	Quantile 2	GO:0000160	phosphorelay signal transduction system	640	164.64	165	0.02317
B	Quantile 2	GO:0009911	positive regulation of flower development	315	81.03	97	0.02403
B	Quantile 2	GO:0010093	specification of floral organ identity	53	13.63	22	0.02441
B	Quantile 2	GO:0010311	lateral root formation	234	60.2	74	0.02464
B	Quantile 2	GO:0000184	nuclear-transcribed mRNA catabolic process, nonsense-mediated decay	23	5.92	11	0.02502
B	Quantile 2	GO:0015692	lead ion transport	21	5.4	10	0.02504
B	Quantile 2	GO:0048481	plant ovule development	481	123.74	145	0.02537
B	Quantile 2	GO:0070370	cellular heat acclimation	231	59.43	73	0.02587
B	Quantile 2	GO:0000723	telomere maintenance	145	37.3	43	0.02616
B	Quantile 2	GO:1901141	regulation of lignin biosynthetic process	58	14.92	16	0.02628
B	Quantile 2	GO:0006312	mitotic recombination	76	19.55	29	0.02634
B	Quantile 2	GO:2000012	regulation of auxin polar transport	27	6.95	12	0.02682
B	Quantile 2	GO:0042138	meiotic DNA double-strand break formation	94	24.18	33	0.02736
B	Quantile 2	GO:0015867	ATP transport	13	3.34	7	0.02827
B	Quantile 2	GO:0070413	trehalose metabolism in response to stress	13	3.34	7	0.02827
B	Quantile 2	GO:0009934	regulation of meristem structural organization	239	61.48	75	0.02835
B	Quantile 2	GO:0048453	sepal formation	52	13.38	20	0.02946
B	Quantile 2	GO:0045944	positive regulation of transcription by RNA polymerase II	112	28.81	37	0.02989
B	Quantile 2	GO:0034968	histone lysine methylation	314	80.78	120	0.03021
B	Quantile 2	GO:0009753	response to jasmonic acid	1282	329.8	335	0.03067
B	Quantile 2	GO:0002240	response to molecule of oomycetes origin	8	2.06	5	0.03077
B	Quantile 2	GO:0032456	endocytic recycling	8	2.06	5	0.03077
B	Quantile 2	GO:0035344	hypoxanthine transport	8	2.06	5	0.03077
B	Quantile 2	GO:0098702	adenine import across plasma membrane	8	2.06	5	0.03077
B	Quantile 2	GO:0098710	guanine import across plasma membrane	8	2.06	5	0.03077
B	Quantile 2	GO:0098721	uracil import across plasma membrane	8	2.06	5	0.03077
B	Quantile 2	GO:0051321	meiotic cell cycle	562	144.58	187	0.03097
B	Quantile 2	GO:0007154	cell communication	6031	1551.49	1541	0.03107
B	Quantile 2	GO:0010228	vegetative to reproductive phase transition of meristem	719	184.96	211	0.03167
B	Quantile 2	GO:0060964	regulation of gene silencing by miRNA	16	4.12	8	0.03195
B	Quantile 2	GO:0055085	transmembrane transport	1910	491.35	549	0.03207
B	Quantile 2	GO:0010267	production of ta-siRNAs involved in RNA interference	129	33.19	43	0.03249
B	Quantile 2	GO:0006839	mitochondrial transport	188	48.36	56	0.03262
B	Quantile 2	GO:0045595	regulation of cell differentiation	236	60.71	68	0.03264
B	Quantile 2	GO:0016310	phosphorylation	3380	869.51	925	0.03282
B	Quantile 2	GO:0031048	chromatin silencing by small RNA	139	35.76	49	0.03398
B	Quantile 2	GO:0034440	lipid oxidation	248	63.8	76	0.03401
B	Quantile 2	GO:0090503	RNA phosphodiester bond hydrolysis, exonucleolytic	24	6.17	10	0.03425
B	Quantile 2	GO:0051302	regulation of cell division	306	78.72	92	0.03455
B	Quantile 2	GO:0048825	cotyledon development	142	36.53	42	0.03515
B	Quantile 2	GO:0052541	plant-type cell wall cellulose metabolic process	30	7.72	13	0.03551
B	Quantile 2	GO:0010449	root meristem growth	125	32.16	42	0.03595
B	Quantile 2	GO:0052546	cell wall pectin metabolic process	64	16.46	23	0.03614
B	Quantile 2	GO:0009886	post-embryonic animal morphogenesis	28	7.2	12	0.0362
B	Quantile 2	GO:0048281	inflorescence morphogenesis	219	56.34	69	0.03629
B	Quantile 2	GO:0090305	nucleic acid phosphodiester bond hydrolysis	327	84.12	109	0.03711
B	Quantile 2	GO:0009664	plant-type cell wall organization	807	207.6	222	0.03747
B	Quantile 2	GO:0006414	translational elongation	80	20.58	33	0.03781
B	Quantile 2	GO:0010090	trichome morphogenesis	207	53.25	66	0.03788
B	Quantile 2	GO:0006886	intracellular protein transport	1386	356.55	371	0.03831
B	Quantile 2	GO:0009561	megagametogenesis	553	142.26	163	0.03918
B	Quantile 2	GO:0000712	resolution of meiotic recombination intermediates	11	2.83	6	0.03918
B	Quantile 2	GO:0009245	lipid A biosynthetic process	11	2.83	6	0.03918
B	Quantile 2	GO:0016099	monoterpenoid biosynthetic process	11	2.83	6	0.03918
B	Quantile 2	GO:0016120	carotene biosynthetic process	11	2.83	6	0.03918
B	Quantile 2	GO:0033198	response to ATP	11	2.83	6	0.03918
B	Quantile 2	GO:0009556	microsporogenesis	257	66.11	79	0.03974
B	Quantile 2	GO:0009650	UV protection	218	56.08	68	0.03985
B	Quantile 2	GO:0009965	leaf morphogenesis	686	176.47	184	0.04021
B	Quantile 2	GO:0044265	cellular macromolecule catabolic process	1665	428.32	486	0.04038
B	Quantile 2	GO:0006333	chromatin assembly or disassembly	210	54.02	56	0.04103
B	Quantile 2	GO:0010468	regulation of gene expression	4659	1198.54	1268	0.04104
B	Quantile 2	GO:0031935	regulation of chromatin silencing	21	5.4	11	0.04147
B	Quantile 2	GO:0006893	Golgi to plasma membrane transport	7	1.8	5	0.04152
B	Quantile 2	GO:0006273	lagging strand elongation	9	2.32	5	0.04153
B	Quantile 2	GO:0000244	spliceosomal tri-snRNP complex assembly	6	1.54	4	0.04154
B	Quantile 2	GO:0006751	glutathione catabolic process	6	1.54	4	0.04154
B	Quantile 2	GO:0009443	pyridoxal 5'-phosphate salvage	6	1.54	4	0.04154
B	Quantile 2	GO:0010493	Lewis a epitope biosynthetic process	6	1.54	4	0.04154
B	Quantile 2	GO:0048577	negative regulation of short-day photoperiodism, flowering	6	1.54	4	0.04154
B	Quantile 2	GO:0015936	coenzyme A metabolic process	19	4.89	7	0.04154
B	Quantile 2	GO:0010148	transpiration	222	57.11	69	0.04155
B	Quantile 2	GO:0006664	glycolipid metabolic process	215	55.31	55	0.04159
B	Quantile 2	GO:0000303	response to superoxide	72	18.52	26	0.04386
B	Quantile 2	GO:2000693	positive regulation of seed maturation	14	3.6	7	0.04421
B	Quantile 2	GO:0010068	protoderm histogenesis	205	52.74	64	0.04423
B	Quantile 2	GO:0048645	animal organ formation	264	67.91	76	0.04431
B	Quantile 2	GO:2000027	regulation of animal organ morphogenesis	240	61.74	68	0.04478
B	Quantile 2	GO:0010638	positive regulation of organelle organization	218	56.08	89	0.04639
B	Quantile 2	GO:0033500	carbohydrate homeostasis	52	13.38	24	0.04679
B	Quantile 2	GO:0043407	negative regulation of MAP kinase activity	31	7.97	13	0.04698
B	Quantile 2	GO:0090351	seedling development	676	173.9	204	0.04735
B	Quantile 2	GO:0010039	response to iron ion	117	30.1	37	0.04833
B	Quantile 2	GO:0005513	detection of calcium ion	20	5.15	9	0.04838
B	Quantile 2	GO:0015074	DNA integration	20	5.15	9	0.04838
B	Quantile 2	GO:1900140	regulation of seedling development	364	93.64	105	0.0484
B	Quantile 2	GO:0030155	regulation of cell adhesion	206	52.99	64	0.04845
B	Quantile 2	GO:0009639	response to red or far red light	1233	317.19	281	0.04863
B	Quantile 2	GO:0006896	Golgi to vacuole transport	23	5.92	10	0.04875
B	Quantile 2	GO:0010116	positive regulation of abscisic acid biosynthetic process	23	5.92	10	0.04875
B	Quantile 2	GO:0006888	ER to Golgi vesicle-mediated transport	147	37.82	49	0.04956
D	Quantile 2	GO:0006886	intracellular protein transport	1408	366.37	417	2.8e-08
D	Quantile 2	GO:0007165	signal transduction	5053	1314.83	1373	3.5e-05
D	Quantile 2	GO:0051567	histone H3-K9 methylation	223	58.03	85	8.6e-05
D	Quantile 2	GO:0009630	gravitropism	417	108.51	134	0.00015
D	Quantile 2	GO:0009165	nucleotide biosynthetic process	1066	277.38	334	0.00041
D	Quantile 2	GO:0000280	nuclear division	463	120.48	129	0.00046
D	Quantile 2	GO:0000902	cell morphogenesis	1615	420.23	409	0.00048
D	Quantile 2	GO:0030010	establishment of cell polarity	16	4.16	9	0.0005
D	Quantile 2	GO:0030154	cell differentiation	2490	647.92	653	0.00053
D	Quantile 2	GO:0016579	protein deubiquitination	141	36.69	54	0.00095
D	Quantile 2	GO:0046713	borate transport	104	27.06	41	0.00098
D	Quantile 2	GO:0006268	DNA unwinding involved in DNA replication	15	3.9	10	0.00111
D	Quantile 2	GO:0010082	regulation of root meristem growth	97	25.24	39	0.00156
D	Quantile 2	GO:0036092	phosphatidylinositol-3-phosphate biosynthetic process	7	1.82	6	0.00169
D	Quantile 2	GO:0090502	RNA phosphodiester bond hydrolysis, endonucleolytic	112	29.14	43	0.0021
D	Quantile 2	GO:0000956	nuclear-transcribed mRNA catabolic process	168	43.71	57	0.00248
D	Quantile 2	GO:0010304	PSII associated light-harvesting complex II catabolic process	29	7.55	15	0.00273
D	Quantile 2	GO:0006270	DNA replication initiation	79	20.56	32	0.00344
D	Quantile 2	GO:0051726	regulation of cell cycle	434	112.93	120	0.00357
D	Quantile 2	GO:0009870	defense response signaling pathway, resistance gene-dependent	47	12.23	21	0.0043
D	Quantile 2	GO:0051693	actin filament capping	20	5.2	7	0.00458
D	Quantile 2	GO:0009887	animal organ morphogenesis	410	106.68	127	0.00464
D	Quantile 2	GO:0009220	pyrimidine ribonucleotide biosynthetic process	168	43.71	57	0.00601
D	Quantile 2	GO:0009911	positive regulation of flower development	353	91.85	113	0.00665
D	Quantile 2	GO:2000014	regulation of endosperm development	13	3.38	8	0.00733
D	Quantile 2	GO:0006888	ER to Golgi vesicle-mediated transport	159	41.37	55	0.00796
D	Quantile 2	GO:0006349	regulation of gene expression by genetic imprinting	21	5.46	11	0.00884
D	Quantile 2	GO:0016192	vesicle-mediated transport	1042	271.14	329	0.00956
D	Quantile 2	GO:0080129	proteasome core complex assembly	152	39.55	53	0.00959
D	Quantile 2	GO:0006665	sphingolipid metabolic process	105	27.32	33	0.00984
D	Quantile 2	GO:0050665	hydrogen peroxide biosynthetic process	100	26.02	37	0.01045
D	Quantile 2	GO:1903959	regulation of anion transmembrane transport	357	92.89	112	0.01085
D	Quantile 2	GO:0043087	regulation of GTPase activity	82	21.34	26	0.01104
D	Quantile 2	GO:0006415	translational termination	21	5.46	10	0.01227
D	Quantile 2	GO:0000712	resolution of meiotic recombination intermediates	9	2.34	6	0.01228
D	Quantile 2	GO:0006346	methylation-dependent chromatin silencing	145	37.73	51	0.01319
D	Quantile 2	GO:0042147	retrograde transport, endosome to Golgi	22	5.72	11	0.01357
D	Quantile 2	GO:0048838	release of seed from dormancy	22	5.72	11	0.01357
D	Quantile 2	GO:0010051	xylem and phloem pattern formation	491	127.76	142	0.01407
D	Quantile 2	GO:0006094	gluconeogenesis	216	56.2	71	0.0145
D	Quantile 2	GO:0016926	protein desumoylation	99	25.76	36	0.01479
D	Quantile 2	GO:0006750	glutathione biosynthetic process	7	1.82	5	0.01539
D	Quantile 2	GO:1901679	nucleotide transmembrane transport	33	8.59	15	0.01574
D	Quantile 2	GO:0019243	methylglyoxal catabolic process to D-lactate via S-lactoyl-glutathione	93	24.2	34	0.01605
D	Quantile 2	GO:1902476	chloride transmembrane transport	17	4.42	9	0.01616
D	Quantile 2	GO:0019762	glucosinolate catabolic process	49	12.75	17	0.01616
D	Quantile 2	GO:0009910	negative regulation of flower development	55	14.31	22	0.01624
D	Quantile 2	GO:0042793	plastid transcription	71	18.47	27	0.01743
D	Quantile 2	GO:0000494	box C/D snoRNA 3'-end processing	3	0.78	3	0.01761
D	Quantile 2	GO:0051754	meiotic sister chromatid cohesion, centromeric	3	0.78	3	0.01761
D	Quantile 2	GO:0071596	ubiquitin-dependent protein catabolic process via the N-end rule pathway	3	0.78	3	0.01761
D	Quantile 2	GO:1990258	histone glutamine methylation	3	0.78	3	0.01761
D	Quantile 2	GO:0000086	G2/M transition of mitotic cell cycle	80	20.82	23	0.01761
D	Quantile 2	GO:0009263	deoxyribonucleotide biosynthetic process	11	2.86	4	0.01762
D	Quantile 2	GO:0006075	(1->3)-beta-D-glucan biosynthetic process	13	3.38	8	0.0178
D	Quantile 2	GO:0080028	nitrile biosynthetic process	12	3.12	7	0.01781
D	Quantile 2	GO:0032197	transposition, RNA-mediated	5	1.3	4	0.01814
D	Quantile 2	GO:0090241	negative regulation of histone H4 acetylation	5	1.3	4	0.01814
D	Quantile 2	GO:0006913	nucleocytoplasmic transport	279	72.6	77	0.01814
D	Quantile 2	GO:0051574	positive regulation of histone H3-K9 methylation	22	5.72	8	0.01814
D	Quantile 2	GO:0006661	phosphatidylinositol biosynthetic process	130	33.83	46	0.01971
D	Quantile 2	GO:0080187	floral organ senescence	59	15.35	23	0.01976
D	Quantile 2	GO:0048657	anther wall tapetum cell differentiation	259	67.39	78	0.01988
D	Quantile 2	GO:0016132	brassinosteroid biosynthetic process	223	58.03	73	0.02107
D	Quantile 2	GO:0009908	flower development	2248	584.95	625	0.02127
D	Quantile 2	GO:0000911	cytokinesis by cell plate formation	354	92.11	97	0.02175
D	Quantile 2	GO:0046855	inositol phosphate dephosphorylation	29	7.55	13	0.02188
D	Quantile 2	GO:0000245	spliceosomal complex assembly	24	6.24	10	0.02198
D	Quantile 2	GO:0016558	protein import into peroxisome matrix	100	26.02	35	0.02237
D	Quantile 2	GO:0005975	carbohydrate metabolic process	2833	737.17	764	0.02252
D	Quantile 2	GO:0006487	protein N-linked glycosylation	132	34.35	43	0.0231
D	Quantile 2	GO:0010498	proteasomal protein catabolic process	684	177.98	201	0.02375
D	Quantile 2	GO:0009957	epidermal cell fate specification	18	4.68	9	0.02497
D	Quantile 2	GO:0019932	second-messenger-mediated signaling	122	31.75	34	0.02502
D	Quantile 2	GO:0006261	DNA-dependent DNA replication	298	77.54	104	0.02578
D	Quantile 2	GO:0006275	regulation of DNA replication	143	37.21	51	0.02624
D	Quantile 2	GO:0048440	carpel development	611	158.99	177	0.02626
D	Quantile 2	GO:0007000	nucleolus organization	22	5.72	11	0.02702
D	Quantile 2	GO:0009639	response to red or far red light	1209	314.59	306	0.02731
D	Quantile 2	GO:0016246	RNA interference	217	56.46	68	0.02849
D	Quantile 2	GO:0016311	dephosphorylation	483	125.68	155	0.0288
D	Quantile 2	GO:0009965	leaf morphogenesis	746	194.11	209	0.02901
D	Quantile 2	GO:2000022	regulation of jasmonic acid mediated signaling pathway	33	8.59	14	0.02969
D	Quantile 2	GO:0030307	positive regulation of cell growth	18	4.68	9	0.03002
D	Quantile 2	GO:0031167	rRNA methylation	28	7.29	11	0.03003
D	Quantile 2	GO:0090116	C-5 methylation of cytosine	13	3.38	7	0.03003
D	Quantile 2	GO:0010103	stomatal complex morphogenesis	386	100.44	118	0.03018
D	Quantile 2	GO:0009817	defense response to fungus, incompatible interaction	357	92.89	109	0.03056
D	Quantile 2	GO:0048364	root development	2134	555.28	540	0.03108
D	Quantile 2	GO:0000278	mitotic cell cycle	716	186.31	206	0.03123
D	Quantile 2	GO:0032922	circadian regulation of gene expression	8	2.08	5	0.03228
D	Quantile 2	GO:0043066	negative regulation of apoptotic process	8	2.08	5	0.03228
D	Quantile 2	GO:0046373	L-arabinose metabolic process	8	2.08	5	0.03228
D	Quantile 2	GO:0071217	cellular response to external biotic stimulus	8	2.08	5	0.03228
D	Quantile 2	GO:0044267	cellular protein metabolic process	7029	1829	1926	0.03299
D	Quantile 2	GO:0010072	primary shoot apical meristem specification	52	13.53	20	0.03304
D	Quantile 2	GO:0008380	RNA splicing	480	124.9	150	0.03347
D	Quantile 2	GO:0006635	fatty acid beta-oxidation	222	57.77	72	0.03391
D	Quantile 2	GO:0006915	apoptotic process	314	81.71	95	0.03564
D	Quantile 2	GO:0016049	cell growth	1789	465.51	454	0.03675
D	Quantile 2	GO:0006164	purine nucleotide biosynthetic process	787	204.78	233	0.03818
D	Quantile 2	GO:0010216	maintenance of DNA methylation	22	5.72	10	0.03827
D	Quantile 2	GO:0006284	base-excision repair	37	9.63	16	0.03864
D	Quantile 2	GO:0032957	inositol trisphosphate metabolic process	25	6.51	11	0.03907
D	Quantile 2	GO:0006367	transcription initiation from RNA polymerase II promoter	53	13.79	20	0.0391
D	Quantile 2	GO:0000041	transition metal ion transport	440	114.49	115	0.04085
D	Quantile 2	GO:0006084	acetyl-CoA metabolic process	110	28.62	42	0.04189
D	Quantile 2	GO:0007030	Golgi organization	480	124.9	142	0.04209
D	Quantile 2	GO:0006520	cellular amino acid metabolic process	1407	366.11	380	0.0431
D	Quantile 2	GO:0010271	regulation of chlorophyll catabolic process	7	1.82	5	0.04321
D	Quantile 2	GO:0051502	diterpene phytoalexin biosynthetic process	9	2.34	5	0.04322
D	Quantile 2	GO:0006432	phenylalanyl-tRNA aminoacylation	6	1.56	4	0.04322
D	Quantile 2	GO:0006680	glucosylceramide catabolic process	6	1.56	4	0.04322
D	Quantile 2	GO:0015808	L-alanine transport	6	1.56	4	0.04322
D	Quantile 2	GO:0042276	error-prone translesion synthesis	6	1.56	4	0.04322
D	Quantile 2	GO:0048015	phosphatidylinositol-mediated signaling	6	1.56	4	0.04322
D	Quantile 2	GO:1990570	GDP-mannose transmembrane transport	6	1.56	4	0.04322
D	Quantile 2	GO:0030002	cellular anion homeostasis	17	4.42	5	0.04326
D	Quantile 2	GO:0010359	regulation of anion channel activity	325	84.57	98	0.04443
D	Quantile 2	GO:0033044	regulation of chromosome organization	201	52.3	66	0.04444
D	Quantile 2	GO:0006306	DNA methylation	225	58.55	79	0.0451
D	Quantile 2	GO:0009793	embryo development ending in seed dormancy	1443	375.48	407	0.04679
D	Quantile 2	GO:0009060	aerobic respiration	135	35.13	43	0.04861
All	Quantile 3	GO:0009414	response to water deprivation	7096	1793.82	1999	2.7e-08
All	Quantile 3	GO:0009409	response to cold	10088	2550.18	2718	9.7e-08
All	Quantile 3	GO:0009624	response to nematode	1295	327.37	410	1.2e-07
All	Quantile 3	GO:0009860	pollen tube growth	1777	449.21	545	1.3e-06
All	Quantile 3	GO:0031425	chloroplast RNA processing	418	105.67	148	5.4e-06
All	Quantile 3	GO:0046777	protein autophosphorylation	3189	806.16	912	7.2e-06
All	Quantile 3	GO:0010089	xylem development	1641	414.83	493	2.1e-05
All	Quantile 3	GO:0007389	pattern specification process	2552	645.13	714	5.2e-05
All	Quantile 3	GO:0000226	microtubule cytoskeleton organization	1705	431.01	515	6e-05
All	Quantile 3	GO:0009595	detection of biotic stimulus	1573	397.64	488	6.1e-05
All	Quantile 3	GO:0009826	unidimensional cell growth	3880	980.84	1144	6.4e-05
All	Quantile 3	GO:0031348	negative regulation of defense response	3647	921.94	1020	9.9e-05
All	Quantile 3	GO:0009664	plant-type cell wall organization	2471	624.65	726	0.00011
All	Quantile 3	GO:0019295	coenzyme M biosynthetic process	52	13.15	26	0.00011
All	Quantile 3	GO:0048438	floral whorl development	3617	914.35	1005	0.00013
All	Quantile 3	GO:0009682	induced systemic resistance	956	241.67	290	0.00013
All	Quantile 3	GO:0009737	response to abscisic acid	6830	1726.58	1947	0.00014
All	Quantile 3	GO:0009901	anther dehiscence	773	195.41	240	0.00016
All	Quantile 3	GO:0009416	response to light stimulus	10379	2623.74	2698	0.00018
All	Quantile 3	GO:0009749	response to glucose	1219	308.15	355	0.00019
All	Quantile 3	GO:0009742	brassinosteroid mediated signaling pathway	1485	375.4	435	0.0002
All	Quantile 3	GO:0042493	response to drug	10199	2578.24	2783	0.00025
All	Quantile 3	GO:0016045	detection of bacterium	944	238.64	286	0.00026
All	Quantile 3	GO:0009835	fruit ripening	123	31.09	49	0.00027
All	Quantile 3	GO:0060548	negative regulation of cell death	1481	374.39	440	0.00028
All	Quantile 3	GO:0009734	auxin-activated signaling pathway	1614	408.01	463	0.00036
All	Quantile 3	GO:0006979	response to oxidative stress	6358	1607.26	1733	0.00037
All	Quantile 3	GO:0010067	procambium histogenesis	665	168.11	207	0.00038
All	Quantile 3	GO:0007020	microtubule nucleation	283	71.54	98	0.00039
All	Quantile 3	GO:0042744	hydrogen peroxide catabolic process	687	173.67	213	0.0004
All	Quantile 3	GO:0035556	intracellular signal transduction	5138	1298.85	1416	0.0004
All	Quantile 3	GO:0007169	transmembrane receptor protein tyrosine kinase signaling pathway	1566	395.87	454	0.00042
All	Quantile 3	GO:0010102	lateral root morphogenesis	1406	355.43	385	0.00043
All	Quantile 3	GO:0051607	defense response to virus	1757	444.16	505	0.00045
All	Quantile 3	GO:0010305	leaf vascular tissue pattern formation	1003	253.55	300	0.00048
All	Quantile 3	GO:0009808	lignin metabolic process	1968	497.5	574	0.00049
All	Quantile 3	GO:0010480	microsporocyte differentiation	641	162.04	199	0.00056
All	Quantile 3	GO:0009611	response to wounding	5796	1465.19	1562	0.00059
All	Quantile 3	GO:0048439	flower morphogenesis	251	63.45	88	0.00064
All	Quantile 3	GO:0048645	animal organ formation	807	204	246	0.00064
All	Quantile 3	GO:0045851	pH reduction	700	176.96	212	0.00068
All	Quantile 3	GO:0071836	nectar secretion	96	24.27	39	0.0007
All	Quantile 3	GO:0010310	regulation of hydrogen peroxide metabolic process	1026	259.37	301	0.00076
All	Quantile 3	GO:0009729	detection of brassinosteroid stimulus	659	166.59	203	0.00076
All	Quantile 3	GO:0010223	secondary shoot formation	745	188.33	227	0.00078
All	Quantile 3	GO:0009269	response to desiccation	440	111.23	141	0.00083
All	Quantile 3	GO:0010023	proanthocyanidin biosynthetic process	170	42.97	52	0.0009
All	Quantile 3	GO:0006970	response to osmotic stress	9472	2394.46	2541	0.00092
All	Quantile 3	GO:0001558	regulation of cell growth	1521	384.5	438	0.00093
All	Quantile 3	GO:0051302	regulation of cell division	941	237.88	274	0.00095
All	Quantile 3	GO:1901529	positive regulation of anion channel activity	641	162.04	197	0.00102
All	Quantile 3	GO:0010075	regulation of meristem growth	1908	482.33	533	0.00108
All	Quantile 3	GO:0051260	protein homooligomerization	939	237.37	285	0.00109
All	Quantile 3	GO:0007172	signal complex assembly	635	160.52	195	0.00112
All	Quantile 3	GO:0010234	anther wall tapetum cell fate specification	635	160.52	195	0.00112
All	Quantile 3	GO:0090548	response to nitrate starvation	635	160.52	195	0.00112
All	Quantile 3	GO:1901528	hydrogen peroxide mediated signaling pathway involved in stomatal movement	635	160.52	195	0.00112
All	Quantile 3	GO:1902025	nitrate import	635	160.52	195	0.00112
All	Quantile 3	GO:2000604	negative regulation of secondary growth	635	160.52	195	0.00112
All	Quantile 3	GO:0030155	regulation of cell adhesion	646	163.3	198	0.00114
All	Quantile 3	GO:0010584	pollen exine formation	1521	384.5	434	0.00121
All	Quantile 3	GO:0009846	pollen germination	1235	312.2	359	0.00129
All	Quantile 3	GO:0042335	cuticle development	1022	258.35	299	0.00135
All	Quantile 3	GO:0010068	protoderm histogenesis	641	162.04	196	0.00136
All	Quantile 3	GO:0055072	iron ion homeostasis	1261	318.77	374	0.00139
All	Quantile 3	GO:0045893	positive regulation of transcription, DNA-templated	2325	587.74	636	0.00141
All	Quantile 3	GO:0009945	radial axis specification	638	161.28	195	0.00143
All	Quantile 3	GO:0006898	receptor-mediated endocytosis	698	176.45	209	0.00143
All	Quantile 3	GO:2000027	regulation of animal organ morphogenesis	737	186.31	231	0.00144
All	Quantile 3	GO:0044237	cellular metabolic process	50087	12661.6	12701	0.00146
All	Quantile 3	GO:0042938	dipeptide transport	204	51.57	71	0.00153
All	Quantile 3	GO:0009926	auxin polar transport	751	189.85	209	0.00166
All	Quantile 3	GO:1900140	regulation of seedling development	1120	283.13	318	0.00172
All	Quantile 3	GO:0044036	cell wall macromolecule metabolic process	1817	459.32	513	0.00172
All	Quantile 3	GO:0050832	defense response to fungus	6917	1748.57	1842	0.00177
All	Quantile 3	GO:0030244	cellulose biosynthetic process	1127	284.9	329	0.0018
All	Quantile 3	GO:0009942	longitudinal axis specification	678	171.39	205	0.00194
All	Quantile 3	GO:0009960	endosperm development	1042	263.41	303	0.00196
All	Quantile 3	GO:0042538	hyperosmotic salinity response	2173	549.32	593	0.00199
All	Quantile 3	GO:0010152	pollen maturation	711	179.74	214	0.002
All	Quantile 3	GO:0080147	root hair cell development	1141	288.44	320	0.00202
All	Quantile 3	GO:0070370	cellular heat acclimation	722	182.52	217	0.00202
All	Quantile 3	GO:0009626	plant-type hypersensitive response	5684	1436.88	1550	0.00204
All	Quantile 3	GO:0048235	pollen sperm cell differentiation	668	168.87	202	0.00207
All	Quantile 3	GO:0042391	regulation of membrane potential	84	21.23	33	0.00221
All	Quantile 3	GO:0009744	response to sucrose	1097	277.31	322	0.00225
All	Quantile 3	GO:0098869	cellular oxidant detoxification	265	66.99	91	0.00233
All	Quantile 3	GO:0000256	allantoin catabolic process	14	3.54	9	0.00234
All	Quantile 3	GO:0019877	diaminopimelate biosynthetic process	14	3.54	9	0.00234
All	Quantile 3	GO:0009934	regulation of meristem structural organization	735	185.8	220	0.00235
All	Quantile 3	GO:0001944	vasculature development	797	201.48	237	0.00237
All	Quantile 3	GO:0009581	detection of external stimulus	394	99.6	112	0.00243
All	Quantile 3	GO:0009944	polarity specification of adaxial/abaxial axis	981	247.99	287	0.0025
All	Quantile 3	GO:0019953	sexual reproduction	2964	749.28	813	0.00256
All	Quantile 3	GO:0010227	floral organ abscission	752	190.1	224	0.00279
All	Quantile 3	GO:0051365	cellular response to potassium ion starvation	205	51.82	70	0.00284
All	Quantile 3	GO:0006145	purine nucleobase catabolic process	45	11.38	19	0.003
All	Quantile 3	GO:0010136	ureide catabolic process	12	3.03	8	0.003
All	Quantile 3	GO:0009800	cinnamic acid biosynthetic process	56	14.16	24	0.00306
All	Quantile 3	GO:0046686	response to cadmium ion	3081	778.86	841	0.00332
All	Quantile 3	GO:0052544	defense response by callose deposition in cell wall	1652	417.61	466	0.00336
All	Quantile 3	GO:0071470	cellular response to osmotic stress	1308	330.65	330	0.00339
All	Quantile 3	GO:0043547	positive regulation of GTPase activity	160	40.45	57	0.00347
All	Quantile 3	GO:0009646	response to absence of light	545	137.77	161	0.00361
All	Quantile 3	GO:0006813	potassium ion transport	855	216.14	255	0.00362
All	Quantile 3	GO:0010148	transpiration	691	174.68	206	0.00382
All	Quantile 3	GO:0010431	seed maturation	1516	383.23	425	0.00382
All	Quantile 3	GO:0008219	cell death	7001	1769.8	1918	0.00408
All	Quantile 3	GO:0045036	protein targeting to chloroplast	222	56.12	72	0.0041
All	Quantile 3	GO:0009819	drought recovery	144	36.4	51	0.00435
All	Quantile 3	GO:1902347	response to strigolactone	18	4.55	12	0.00454
[truncated: 1,606 more rows]

## Sheet: TableS7
Supplemental Table S7. GO slim term enrichment analysis of genes grouped by decreasing DMC1 ChIP-seq signal. Genes grouped into four quantiles defined by decreasing DMC1 ChIP-seq signal (log2[ChIP/input]) (across all subgenomes or within each subgenome) were analyzed for enrichment of “biological process” GO slim terms, relative to their representation among all genes in the genome or the corresp…
Subgenome	DMC1 gene quantile	GO ID	GO term	Annotated genes in subgenome	Expected genes in quantile	Observed genes in quantile	P-value
All	Quantile 1	GO:0015979	photosynthesis	1389	351.19	520	4.3e-24
All	Quantile 1	GO:0006091	generation of precursor metabolites and energy	3218	813.64	1041	2.6e-20
All	Quantile 1	GO:0006412	translation	1755	443.73	591	1.3e-15
All	Quantile 1	GO:0006139	nucleobase-containing compound metabolic process	22849	5777.12	6308	1.5e-14
All	Quantile 1	GO:0006259	DNA metabolic process	4160	1051.81	1240	6.5e-12
All	Quantile 1	GO:0019538	protein metabolic process	22885	5786.22	6235	1.1e-11
All	Quantile 1	GO:0040029	regulation of gene expression, epigenetic	1514	382.8	469	2.7e-07
All	Quantile 1	GO:0007049	cell cycle	4055	1025.26	1123	0.00017
All	Quantile 1	GO:0009606	tropism	1281	323.89	368	0.00261
All	Quantile 1	GO:0006464	cellular protein modification process	15882	4015.59	4149	0.0033
All	Quantile 1	GO:0009987	cellular process	60993	15421.4	15621	0.00873
All	Quantile 1	GO:0009058	biosynthetic process	31681	8010.19	8206	0.03405
A	Quantile 1	GO:0006259	DNA metabolic process	1382	350.57	437	4.6e-08
A	Quantile 1	GO:0006412	translation	594	150.68	200	3e-06
A	Quantile 1	GO:0006139	nucleobase-containing compound metabolic process	7527	1909.37	2106	4.1e-06
A	Quantile 1	GO:0019538	protein metabolic process	7466	1893.89	2070	8e-06
A	Quantile 1	GO:0040029	regulation of gene expression, epigenetic	498	126.33	167	2.4e-05
A	Quantile 1	GO:0007049	cell cycle	1342	340.42	390	0.00089
A	Quantile 1	GO:0015979	photosynthesis	426	108.06	137	0.0009
A	Quantile 1	GO:0006091	generation of precursor metabolites and energy	1034	262.29	302	0.00237
A	Quantile 1	GO:0006464	cellular protein modification process	5140	1303.86	1367	0.0126
A	Quantile 1	GO:0000003	reproduction	5126	1300.31	1266	0.025
B	Quantile 1	GO:0006091	generation of precursor metabolites and energy	1039	262.09	339	2.9e-08
B	Quantile 1	GO:0015979	photosynthesis	430	108.47	149	7.1e-06
B	Quantile 1	GO:0006139	nucleobase-containing compound metabolic process	7676	1936.28	2083	4.7e-05
B	Quantile 1	GO:0006412	translation	606	152.86	194	8.6e-05
B	Quantile 1	GO:0019538	protein metabolic process	7736	1951.41	2063	0.0011
B	Quantile 1	GO:0006259	DNA metabolic process	1449	365.51	406	0.0068
B	Quantile 1	GO:0040029	regulation of gene expression, epigenetic	516	130.16	155	0.0071
D	Quantile 1	GO:0015979	photosynthesis	533	134.89	234	3.4e-21
D	Quantile 1	GO:0006091	generation of precursor metabolites and energy	1145	289.77	403	1.7e-14
D	Quantile 1	GO:0006412	translation	555	140.46	195	1.2e-07
D	Quantile 1	GO:0006139	nucleobase-containing compound metabolic process	7646	1935.01	2124	6.2e-07
D	Quantile 1	GO:0019538	protein metabolic process	7683	1944.37	2106	1.5e-05
D	Quantile 1	GO:0006259	DNA metabolic process	1329	336.34	396	8e-05
D	Quantile 1	GO:0009606	tropism	428	108.32	134	0.0028
D	Quantile 1	GO:0009987	cellular process	20366	5154.12	5239	0.0105
D	Quantile 1	GO:0007049	cell cycle	1370	346.71	383	0.0117
D	Quantile 1	GO:0040029	regulation of gene expression, epigenetic	500	126.54	145	0.0324
D	Quantile 1	GO:0009058	biosynthetic process	10702	2708.41	2803	0.0334
D	Quantile 1	GO:0006464	cellular protein modification process	5382	1362.05	1410	0.0473
All	Quantile 2	GO:0007049	cell cycle	4055	1053.95	1233	5e-11
All	Quantile 2	GO:0006464	cellular protein modification process	15882	4127.95	4442	1.2e-10
All	Quantile 2	GO:0006259	DNA metabolic process	4160	1081.24	1258	1.4e-10
All	Quantile 2	GO:0016043	cellular component organization	19283	5011.91	5324	2e-09
All	Quantile 2	GO:0040029	regulation of gene expression, epigenetic	1514	393.51	492	7.2e-09
All	Quantile 2	GO:0009058	biosynthetic process	31681	8234.32	8549	1.5e-06
All	Quantile 2	GO:0000003	reproduction	15565	4045.56	4276	2.3e-06
All	Quantile 2	GO:0006810	transport	15624	4060.89	4282	3.6e-06
All	Quantile 2	GO:0005975	carbohydrate metabolic process	6623	1721.41	1867	1.2e-05
All	Quantile 2	GO:0006139	nucleobase-containing compound metabolic process	22849	5938.77	6277	3.4e-05
All	Quantile 2	GO:0009653	anatomical structure morphogenesis	10306	2678.67	2826	0.00021
All	Quantile 2	GO:0006412	translation	1755	456.15	520	0.00029
All	Quantile 2	GO:0009056	catabolic process	12331	3204.99	3359	0.00031
All	Quantile 2	GO:0009790	embryo development	4238	1101.51	1196	0.00039
All	Quantile 2	GO:0009606	tropism	1281	332.95	384	0.00068
All	Quantile 2	GO:0009791	post-embryonic development	15121	3930.15	4096	0.00191
All	Quantile 2	GO:0006629	lipid metabolic process	8181	2126.35	2231	0.00284
All	Quantile 2	GO:0007275	multicellular organism development	20613	5357.6	5590	0.00473
All	Quantile 2	GO:0030154	cell differentiation	6429	1670.98	1754	0.00733
All	Quantile 2	GO:0009987	cellular process	60993	15852.9	16154	0.01206
All	Quantile 2	GO:0009908	flower development	6004	1560.52	1620	0.03574
All	Quantile 2	GO:0007154	cell communication	17752	4613.99	4621	0.03775
A	Quantile 2	GO:0016043	cellular component organization	6382	1672.83	1819	9.9e-07
A	Quantile 2	GO:0006464	cellular protein modification process	5140	1347.28	1468	1.1e-05
A	Quantile 2	GO:0007049	cell cycle	1342	351.76	419	1.4e-05
A	Quantile 2	GO:0005975	carbohydrate metabolic process	2232	585.05	650	0.00065
A	Quantile 2	GO:0006259	DNA metabolic process	1382	362.25	414	0.00073
A	Quantile 2	GO:0030154	cell differentiation	2094	548.87	606	0.0018
A	Quantile 2	GO:0009653	anatomical structure morphogenesis	3389	888.31	957	0.00224
A	Quantile 2	GO:0006810	transport	5207	1364.84	1440	0.00433
A	Quantile 2	GO:0009056	catabolic process	4016	1052.66	1120	0.00467
A	Quantile 2	GO:0007275	multicellular organism development	6803	1783.18	1844	0.00722
A	Quantile 2	GO:0000003	reproduction	5126	1343.61	1412	0.00986
A	Quantile 2	GO:0040029	regulation of gene expression, epigenetic	498	130.53	153	0.01285
A	Quantile 2	GO:0009790	embryo development	1399	366.7	403	0.01316
A	Quantile 2	GO:0009856	pollination	1141	299.08	329	0.01657
A	Quantile 2	GO:0006629	lipid metabolic process	2720	712.96	758	0.02044
A	Quantile 2	GO:0009987	cellular process	20130	5276.42	5398	0.03173
A	Quantile 2	GO:0006412	translation	594	155.7	175	0.03915
A	Quantile 2	GO:0019538	protein metabolic process	7466	1956.97	2110	0.0458
A	Quantile 2	GO:0009058	biosynthetic process	10433	2734.67	2804	0.04653
B	Quantile 2	GO:0006259	DNA metabolic process	1449	373.56	457	2.5e-07
B	Quantile 2	GO:0007049	cell cycle	1343	346.23	418	3.7e-06
B	Quantile 2	GO:0040029	regulation of gene expression, epigenetic	516	133.03	178	5.6e-06
B	Quantile 2	GO:0006464	cellular protein modification process	5360	1381.84	1503	1.3e-05
B	Quantile 2	GO:0016043	cellular component organization	6378	1644.29	1755	0.00015
B	Quantile 2	GO:0006810	transport	5232	1348.84	1441	0.00063
B	Quantile 2	GO:0009653	anatomical structure morphogenesis	3402	877.06	949	0.00142
B	Quantile 2	GO:0000003	reproduction	5176	1334.4	1412	0.00632
B	Quantile 2	GO:0009058	biosynthetic process	10546	2718.82	2812	0.01085
B	Quantile 2	GO:0005975	carbohydrate metabolic process	2160	556.86	602	0.01135
B	Quantile 2	GO:0030154	cell differentiation	2131	549.39	593	0.01339
B	Quantile 2	GO:0006412	translation	606	156.23	180	0.01533
B	Quantile 2	GO:0006139	nucleobase-containing compound metabolic process	7676	1978.92	2104	0.01833
B	Quantile 2	GO:0009791	post-embryonic development	5055	1303.21	1370	0.03762
B	Quantile 2	GO:0007275	multicellular organism development	6856	1767.52	1861	0.04562
D	Quantile 2	GO:0009058	biosynthetic process	10702	2775.06	2924	3.5e-05
D	Quantile 2	GO:0006139	nucleobase-containing compound metabolic process	7646	1982.63	2120	0.00024
D	Quantile 2	GO:0040029	regulation of gene expression, epigenetic	500	129.65	161	0.00092
D	Quantile 2	GO:0000003	reproduction	5263	1364.71	1448	0.00161
D	Quantile 2	GO:0006259	DNA metabolic process	1329	344.61	388	0.00318
D	Quantile 2	GO:0009606	tropism	428	110.98	135	0.00507
D	Quantile 2	GO:0006464	cellular protein modification process	5382	1395.57	1466	0.00733
D	Quantile 2	GO:0009791	post-embryonic development	5100	1322.44	1403	0.00795
D	Quantile 2	GO:0007049	cell cycle	1370	355.24	394	0.00812
D	Quantile 2	GO:0006629	lipid metabolic process	2748	712.56	761	0.01397
D	Quantile 2	GO:0006810	transport	5185	1344.48	1406	0.01539
D	Quantile 2	GO:0006412	translation	555	143.91	166	0.01831
D	Quantile 2	GO:0009790	embryo development	1469	380.92	415	0.02037
D	Quantile 2	GO:0009056	catabolic process	4192	1087	1140	0.02181
D	Quantile 2	GO:0016043	cellular component organization	6523	1691.43	1753	0.02298
All	Quantile 3	GO:0016049	cell growth	4764	1205.82	1379	2.3e-09
All	Quantile 3	GO:0009856	pollination	3490	883.36	1025	1.1e-08
All	Quantile 3	GO:0030154	cell differentiation	6429	1627.25	1803	1e-07
All	Quantile 3	GO:0009719	response to endogenous stimulus	15569	3940.68	4174	8.7e-07
All	Quantile 3	GO:0009653	anatomical structure morphogenesis	10306	2608.56	2794	3.8e-06
All	Quantile 3	GO:0008219	cell death	6322	1600.16	1733	3.7e-05
All	Quantile 3	GO:0007165	signal transduction	13236	3350.17	3532	3.7e-05
All	Quantile 3	GO:0009991	response to extracellular stimulus	4224	1069.14	1167	0.00022
All	Quantile 3	GO:0016043	cellular component organization	19283	4880.73	5061	0.0003
All	Quantile 3	GO:0009607	response to biotic stimulus	16668	4218.85	4378	0.00073
All	Quantile 3	GO:0006810	transport	15624	3954.6	4107	0.0009
All	Quantile 3	GO:0019725	cellular homeostasis	1961	496.35	554	0.00146
All	Quantile 3	GO:0019748	secondary metabolic process	5015	1269.35	1358	0.00163
All	Quantile 3	GO:0005975	carbohydrate metabolic process	6623	1676.35	1775	0.00195
All	Quantile 3	GO:0006464	cellular protein modification process	15882	4019.9	4158	0.00247
All	Quantile 3	GO:0009605	response to external stimulus	21336	5400.37	5596	0.00266
All	Quantile 3	GO:0009838	abscission	806	204.01	239	0.00282
All	Quantile 3	GO:0007154	cell communication	17752	4493.22	4744	0.00314
All	Quantile 3	GO:0009628	response to abiotic stimulus	27058	6848.66	6995	0.00576
All	Quantile 3	GO:0009908	flower development	6004	1519.68	1599	0.00764
All	Quantile 3	GO:0008152	metabolic process	55817	14127.9	14216	0.03085
All	Quantile 3	GO:0007275	multicellular organism development	20613	5217.37	5345	0.04736
A	Quantile 3	GO:0009856	pollination	1141	287.66	344	0.00033
A	Quantile 3	GO:0016049	cell growth	1569	395.56	450	0.00069
A	Quantile 3	GO:0009838	abscission	253	63.78	85	0.00168
A	Quantile 3	GO:0030154	cell differentiation	2094	527.92	580	0.00361
A	Quantile 3	GO:0009653	anatomical structure morphogenesis	3389	854.41	911	0.00889
A	Quantile 3	GO:0009607	response to biotic stimulus	5495	1385.36	1445	0.01936
A	Quantile 3	GO:0007165	signal transduction	4389	1106.52	1159	0.02394
A	Quantile 3	GO:0009719	response to endogenous stimulus	5129	1293.08	1344	0.03528
A	Quantile 3	GO:0008219	cell death	2094	527.92	563	0.03532
A	Quantile 3	GO:0007275	multicellular organism development	6803	1715.12	1776	0.04168
A	Quantile 3	GO:0005975	carbohydrate metabolic process	2232	562.71	597	0.043
A	Quantile 3	GO:0009875	pollen-pistil interaction	184	46.39	57	0.04468
B	Quantile 3	GO:0009719	response to endogenous stimulus	5137	1308.02	1440	1.6e-06
B	Quantile 3	GO:0016049	cell growth	1558	396.71	465	3.1e-05
B	Quantile 3	GO:0007165	signal transduction	4384	1116.28	1215	0.0001
B	Quantile 3	GO:0016043	cellular component organization	6378	1624.01	1727	0.00037
B	Quantile 3	GO:0008219	cell death	2154	548.46	614	0.00044
B	Quantile 3	GO:0009856	pollination	1153	293.58	339	0.00162
B	Quantile 3	GO:0000003	reproduction	5176	1317.95	1403	0.00399
B	Quantile 3	GO:0009991	response to extracellular stimulus	1438	366.15	404	0.01053
B	Quantile 3	GO:0030154	cell differentiation	2131	542.61	586	0.01348
B	Quantile 3	GO:0009653	anatomical structure morphogenesis	3402	866.24	917	0.01732
B	Quantile 3	GO:0007154	cell communication	5942	1512.99	1635	0.02158
B	Quantile 3	GO:0006810	transport	5232	1332.2	1382	0.04041
B	Quantile 3	GO:0006464	cellular protein modification process	5360	1364.8	1414	0.04365
D	Quantile 3	GO:0030154	cell differentiation	2204	556.83	637	2.7e-05
D	Quantile 3	GO:0016043	cellular component organization	6523	1648	1754	0.00026
D	Quantile 3	GO:0009653	anatomical structure morphogenesis	3515	888.04	968	0.00049
D	Quantile 3	GO:0009856	pollination	1196	302.16	342	0.00054
D	Quantile 3	GO:0016049	cell growth	1637	413.58	467	0.00104
D	Quantile 3	GO:0019748	secondary metabolic process	1742	440.11	492	0.00183
D	Quantile 3	GO:0009991	response to extracellular stimulus	1390	351.18	394	0.00391
D	Quantile 3	GO:0009908	flower development	2062	520.95	569	0.0063
D	Quantile 3	GO:0019725	cellular homeostasis	660	166.75	195	0.00649
D	Quantile 3	GO:0006810	transport	5185	1309.96	1379	0.00724
D	Quantile 3	GO:0009605	response to external stimulus	7116	1797.81	1892	0.00756
D	Quantile 3	GO:0009056	catabolic process	4192	1059.08	1119	0.01069
D	Quantile 3	GO:0009607	response to biotic stimulus	5572	1407.73	1468	0.01882
D	Quantile 3	GO:0005975	carbohydrate metabolic process	2231	563.65	605	0.01911
D	Quantile 3	GO:0009719	response to endogenous stimulus	5303	1339.77	1398	0.02046
D	Quantile 3	GO:0006464	cellular protein modification process	5382	1359.73	1415	0.02683
D	Quantile 3	GO:0008152	metabolic process	18669	4716.61	4766	0.03788
D	Quantile 3	GO:0007154	cell communication	5942	1501.21	1565	0.04046
D	Quantile 3	GO:0008219	cell death	2074	523.98	556	0.04892
All	Quantile 4	GO:0009628	response to abiotic stimulus	27058	6335.28	7172	1e-30
All	Quantile 4	GO:0009719	response to endogenous stimulus	15569	3645.28	4251	1e-30
All	Quantile 4	GO:0006950	response to stress	37670	8819.94	9460	8.4e-28
All	Quantile 4	GO:0019748	secondary metabolic process	5015	1174.2	1404	4.3e-15
All	Quantile 4	GO:0009991	response to extracellular stimulus	4224	988.99	1157	3.7e-10
All	Quantile 4	GO:0007165	signal transduction	13236	3099.04	3310	1.2e-06
All	Quantile 4	GO:0007610	behavior	13	3.04	9	0.00059
All	Quantile 4	GO:0008219	cell death	6322	1480.21	1553	0.01282
All	Quantile 4	GO:0040007	growth	7125	1668.23	1737	0.01827
A	Quantile 4	GO:0009628	response to abiotic stimulus	8987	2085.9	2391	3.5e-21
A	Quantile 4	GO:0009719	response to endogenous stimulus	5129	1190.45	1378	4.2e-12
A	Quantile 4	GO:0006950	response to stress	12520	2905.92	3122	9.2e-11
A	Quantile 4	GO:0019748	secondary metabolic process	1631	378.56	469	4.9e-08
A	Quantile 4	GO:0009991	response to extracellular stimulus	1396	324.01	384	6.9e-05
A	Quantile 4	GO:0007610	behavior	5	1.16	5	0.00067
A	Quantile 4	GO:0007165	signal transduction	4389	1018.69	1082	0.00705
B	Quantile 4	GO:0009628	response to abiotic stimulus	9091	2139.26	2408	1.6e-16
B	Quantile 4	GO:0009719	response to endogenous stimulus	5137	1208.82	1379	3.7e-10
B	Quantile 4	GO:0006950	response to stress	12784	3008.29	3185	1.4e-07
B	Quantile 4	GO:0019748	secondary metabolic process	1642	386.39	442	0.00054
B	Quantile 4	GO:0009991	response to extracellular stimulus	1438	338.39	383	0.00265
B	Quantile 4	GO:0007165	signal transduction	4384	1031.63	1086	0.01808
B	Quantile 4	GO:0007610	behavior	4	0.94	3	0.04291
B	Quantile 4	GO:0040007	growth	2331	548.52	566	0.04755
D	Quantile 4	GO:0009719	response to endogenous stimulus	5303	1246.09	1489	1.8e-18
D	Quantile 4	GO:0009628	response to abiotic stimulus	8980	2110.11	2376	1.7e-16
D	Quantile 4	GO:0006950	response to stress	12366	2905.74	3156	8.2e-14
D	Quantile 4	GO:0019748	secondary metabolic process	1742	409.33	492	1.2e-06
D	Quantile 4	GO:0009991	response to extracellular stimulus	1390	326.62	391	2.2e-05
D	Quantile 4	GO:0007165	signal transduction	4463	1048.71	1139	0.00026
D	Quantile 4	GO:0016049	cell growth	1637	384.66	424	0.01015
D	Quantile 4	GO:0009838	abscission	293	68.85	85	0.0166
D	Quantile 4	GO:0008219	cell death	2074	487.35	525	0.02297
D	Quantile 4	GO:0009607	response to biotic stimulus	5572	1309.3	1361	0.03395

## Sheet: TableS8
Supplemental Table S8. GO term enrichment analysis of genes grouped by decreasing ASY1 ChIP-seq signal. Genes grouped into four quantiles defined by decreasing ASY1 ChIP-seq signal (log2[ChIP/input]) (across all subgenomes or within each subgenome) were analyzed for enrichment of “biological process” GO terms, relative to their representation among all genes in the genome or the corresponding sub…
Subgenome	ASY1 gene quantile	GO ID	GO term	Annotated genes in subgenome	Expected genes in quantile	Observed genes in quantile	P-value
All	Quantile 1	GO:0006354	DNA-templated transcription, elongation	612	152.89	356	1e-30
All	Quantile 1	GO:0006468	protein phosphorylation	7806	1950.03	2248	1e-30
All	Quantile 1	GO:0009626	plant-type hypersensitive response	5684	1419.93	1524	3.1e-23
All	Quantile 1	GO:0007165	signal transduction	14964	3738.19	3646	9.3e-21
All	Quantile 1	GO:0006952	defense response	19730	4928.79	5300	2.9e-18
All	Quantile 1	GO:0009814	defense response, incompatible interaction	7882	1969.02	2251	5e-18
All	Quantile 1	GO:0006412	translation	3383	845.11	1097	3e-16
All	Quantile 1	GO:0019684	photosynthesis, light reaction	1316	328.75	485	1.6e-15
All	Quantile 1	GO:0010207	photosystem II assembly	632	157.88	247	1.5e-14
All	Quantile 1	GO:0006091	generation of precursor metabolites and energy	3337	833.62	1043	3.7e-14
All	Quantile 1	GO:0009627	systemic acquired resistance	5436	1357.98	1473	7.3e-13
All	Quantile 1	GO:0043693	monoterpene biosynthetic process	68	16.99	45	9.8e-13
All	Quantile 1	GO:0016106	sesquiterpenoid biosynthetic process	343	85.69	87	4.2e-11
All	Quantile 1	GO:0046713	borate transport	337	84.19	132	4.4e-10
All	Quantile 1	GO:0048578	positive regulation of long-day photoperiodism, flowering	49	12.24	33	5.2e-10
All	Quantile 1	GO:0042773	ATP synthesis coupled electron transport	200	49.96	103	2.4e-09
All	Quantile 1	GO:0000160	phosphorelay signal transduction system	1884	470.65	441	4.1e-08
All	Quantile 1	GO:0015979	photosynthesis	1878	469.15	673	1.9e-07
All	Quantile 1	GO:0009561	megagametogenesis	1599	399.45	425	3e-07
All	Quantile 1	GO:0006120	mitochondrial electron transport, NADH to ubiquinone	54	13.49	31	4e-07
All	Quantile 1	GO:0006915	apoptotic process	1013	253.06	312	6.9e-07
All	Quantile 1	GO:0009630	gravitropism	1244	310.77	367	7.7e-07
All	Quantile 1	GO:0045338	farnesyl diphosphate metabolic process	63	15.74	29	8.7e-07
All	Quantile 1	GO:0010048	vernalization response	592	147.89	203	1.1e-06
All	Quantile 1	GO:0080155	regulation of double fertilization forming a zygote and endosperm	51	12.74	29	1.2e-06
All	Quantile 1	GO:0010082	regulation of root meristem growth	287	71.7	108	1.4e-06
All	Quantile 1	GO:0016310	phosphorylation	10020	2503.12	2912	2e-06
All	Quantile 1	GO:0006995	cellular response to nitrogen starvation	605	151.14	202	2.1e-06
All	Quantile 1	GO:0006506	GPI anchor biosynthetic process	95	23.73	47	2.4e-06
All	Quantile 1	GO:0032259	methylation	2994	747.94	891	2.9e-06
All	Quantile 1	GO:0051762	sesquiterpene biosynthetic process	43	10.74	25	3.8e-06
All	Quantile 1	GO:0006406	mRNA export from nucleus	293	73.19	115	4.4e-06
All	Quantile 1	GO:0006511	ubiquitin-dependent protein catabolic process	3354	837.87	907	4.6e-06
All	Quantile 1	GO:0009767	photosynthetic electron transport chain	396	98.93	145	4.8e-06
All	Quantile 1	GO:0030187	melatonin biosynthetic process	148	36.97	62	4.9e-06
All	Quantile 1	GO:0032543	mitochondrial translation	96	23.98	46	5.2e-06
All	Quantile 1	GO:0015991	ATP hydrolysis coupled proton transport	128	31.98	55	6.6e-06
All	Quantile 1	GO:0009772	photosynthetic electron transport in photosystem II	57	14.24	30	7e-06
All	Quantile 1	GO:0080036	regulation of cytokinin-activated signaling pathway	52	12.99	23	7.9e-06
All	Quantile 1	GO:0006606	protein import into nucleus	424	105.92	141	1.1e-05
All	Quantile 1	GO:0000462	maturation of SSU-rRNA from tricistronic rRNA transcript (SSU-rRNA, 5.8S rRNA, LSU-rRNA)	137	34.22	57	1.5e-05
All	Quantile 1	GO:0009816	defense response to bacterium, incompatible interaction	1435	358.48	428	1.5e-05
All	Quantile 1	GO:0015986	ATP synthesis coupled proton transport	275	68.7	107	1.7e-05
All	Quantile 1	GO:0019745	pentacyclic triterpenoid biosynthetic process	135	33.72	56	1.9e-05
All	Quantile 1	GO:0006413	translational initiation	457	114.16	168	2.3e-05
All	Quantile 1	GO:0016099	monoterpenoid biosynthetic process	22	5.5	15	2.4e-05
All	Quantile 1	GO:0008299	isoprenoid biosynthetic process	2129	531.85	591	2.7e-05
All	Quantile 1	GO:0019932	second-messenger-mediated signaling	384	95.93	108	3.2e-05
All	Quantile 1	GO:0009769	photosynthesis, light harvesting in photosystem II	119	29.73	50	3.5e-05
All	Quantile 1	GO:0000394	RNA splicing, via endonucleolytic cleavage and ligation	528	131.9	173	3.7e-05
All	Quantile 1	GO:2001020	regulation of response to DNA damage stimulus	82	20.48	30	3.7e-05
All	Quantile 1	GO:0022904	respiratory electron transport chain	232	57.96	122	5.2e-05
All	Quantile 1	GO:0042776	mitochondrial ATP synthesis coupled proton transport	7	1.75	7	6.1e-05
All	Quantile 1	GO:0006810	transport	16682	4167.37	4132	7.8e-05
All	Quantile 1	GO:0009560	embryo sac egg cell differentiation	421	105.17	139	9.9e-05
All	Quantile 1	GO:0010332	response to gamma radiation	417	104.17	138	0.00011
All	Quantile 1	GO:0016444	somatic cell DNA recombination	122	30.48	49	0.00016
All	Quantile 1	GO:0009220	pyrimidine ribonucleotide biosynthetic process	507	126.65	162	0.00018
All	Quantile 1	GO:2000029	regulation of proanthocyanidin biosynthetic process	51	12.74	25	0.00018
All	Quantile 1	GO:0007166	cell surface receptor signaling pathway	2469	616.79	626	0.00019
All	Quantile 1	GO:0019252	starch biosynthetic process	737	184.11	225	0.00019
All	Quantile 1	GO:0071446	cellular response to salicylic acid stimulus	3263	815.14	788	0.00023
All	Quantile 1	GO:0007009	plasma membrane organization	18	4.5	12	0.00024
All	Quantile 1	GO:0070816	phosphorylation of RNA polymerase II C-terminal domain	31	7.74	13	0.00024
All	Quantile 1	GO:0007129	synapsis	325	81.19	114	0.00025
All	Quantile 1	GO:0000085	mitotic G2 phase	131	32.73	51	0.00029
All	Quantile 1	GO:0001510	RNA methylation	759	189.61	240	0.0003
All	Quantile 1	GO:0045047	protein targeting to ER	98	24.48	36	0.00034
All	Quantile 1	GO:0009660	amyloplast organization	14	3.5	10	0.00034
All	Quantile 1	GO:0009966	regulation of signal transduction	3041	759.68	734	0.00036
All	Quantile 1	GO:0006646	phosphatidylethanolamine biosynthetic process	21	5.25	13	0.00037
All	Quantile 1	GO:0019432	triglyceride biosynthetic process	116	28.98	48	0.00037
All	Quantile 1	GO:0006953	acute-phase response	8	2	7	0.00038
All	Quantile 1	GO:0019307	mannose biosynthetic process	8	2	7	0.00038
All	Quantile 1	GO:0050732	negative regulation of peptidyl-tyrosine phosphorylation	12	3	9	0.00039
All	Quantile 1	GO:0006075	(1->3)-beta-D-glucan biosynthetic process	42	10.49	21	0.00041
All	Quantile 1	GO:0000023	maltose metabolic process	531	132.65	167	0.00044
All	Quantile 1	GO:0070413	trehalose metabolism in response to stress	29	7.24	16	0.00049
All	Quantile 1	GO:0010389	regulation of G2/M transition of mitotic cell cycle	221	55.21	76	0.00053
All	Quantile 1	GO:0043967	histone H4 acetylation	53	13.24	28	0.00069
All	Quantile 1	GO:0009617	response to bacterium	8448	2110.41	2094	0.00075
All	Quantile 1	GO:0009861	jasmonic acid and ethylene-dependent systemic resistance	283	70.7	90	0.00076
All	Quantile 1	GO:0006886	intracellular protein transport	4274	1067.7	1143	0.00079
All	Quantile 1	GO:0009311	oligosaccharide metabolic process	1034	258.31	302	0.00083
All	Quantile 1	GO:0042549	photosystem II stabilization	33	8.24	17	0.00094
All	Quantile 1	GO:0051484	isopentenyl diphosphate biosynthetic process, methylerythritol 4-phosphate pathway involved in terpenoid biosynthetic process	5	1.25	5	0.00097
All	Quantile 1	GO:0006499	N-terminal protein myristoylation	355	88.68	115	0.00099
All	Quantile 1	GO:0006349	regulation of gene expression by genetic imprinting	62	15.49	27	0.00108
All	Quantile 1	GO:0050821	protein stabilization	65	16.24	28	0.00108
All	Quantile 1	GO:0006344	maintenance of chromatin silencing	28	6.99	15	0.00111
All	Quantile 1	GO:0051788	response to misfolded protein	922	230.33	269	0.00123
All	Quantile 1	GO:0000455	enzyme-directed rRNA pseudouridine synthesis	9	2.25	7	0.00134
All	Quantile 1	GO:0006865	amino acid transport	1495	373.47	348	0.00143
All	Quantile 1	GO:0042148	strand invasion	34	8.49	17	0.00145
All	Quantile 1	GO:0006465	signal peptide processing	60	14.99	26	0.00145
All	Quantile 1	GO:0010311	lateral root formation	694	173.37	208	0.00157
All	Quantile 1	GO:0010265	SCF complex assembly	16	4	10	0.00163
All	Quantile 1	GO:0045116	protein neddylation	29	7.24	15	0.00177
All	Quantile 1	GO:0001731	formation of translation preinitiation complex	67	16.74	28	0.00189
All	Quantile 1	GO:0080027	response to herbivore	215	53.71	73	0.002
All	Quantile 1	GO:0042732	D-xylose metabolic process	118	29.48	44	0.00203
All	Quantile 1	GO:0051726	regulation of cell cycle	1308	326.75	382	0.00203
All	Quantile 1	GO:0031047	gene silencing by RNA	1268	316.76	368	0.00217
All	Quantile 1	GO:0009817	defense response to fungus, incompatible interaction	1030	257.31	297	0.0022
All	Quantile 1	GO:0035269	protein O-linked mannosylation	19	4.75	11	0.00227
All	Quantile 1	GO:0006275	regulation of DNA replication	430	107.42	133	0.00231
All	Quantile 1	GO:0010587	miRNA catabolic process	27	6.74	14	0.00243
All	Quantile 1	GO:0032204	regulation of telomere maintenance	175	43.72	61	0.0025
All	Quantile 1	GO:0000028	ribosomal small subunit assembly	62	15.49	25	0.00259
All	Quantile 1	GO:0005980	glycogen catabolic process	30	7.49	15	0.00272
All	Quantile 1	GO:0000460	maturation of 5.8S rRNA	81	20.23	33	0.00276
All	Quantile 1	GO:0008380	RNA splicing	1453	362.98	441	0.00284
All	Quantile 1	GO:0010225	response to UV-C	37	9.24	19	0.00284
All	Quantile 1	GO:0052543	callose deposition in cell wall	1730	432.18	367	0.00306
All	Quantile 1	GO:0051014	actin filament severing	17	4.25	10	0.00308
All	Quantile 1	GO:0006325	chromatin organization	2663	665.25	729	0.00319
All	Quantile 1	GO:0006450	regulation of translational fidelity	62	15.49	27	0.00345
All	Quantile 1	GO:0048573	photoperiodism, flowering	1132	282.79	318	0.00346
All	Quantile 1	GO:0006013	mannose metabolic process	18	4.5	14	0.00348
All	Quantile 1	GO:2000071	regulation of defense response by callose deposition	79	19.74	31	0.00362
All	Quantile 1	GO:0009610	response to symbiotic fungus	344	85.94	108	0.00386
All	Quantile 1	GO:0000244	spliceosomal tri-snRNP complex assembly	20	5	11	0.00391
All	Quantile 1	GO:0042026	protein refolding	89	22.23	34	0.00396
All	Quantile 1	GO:0051028	mRNA transport	392	97.93	152	0.00406
All	Quantile 1	GO:0000741	karyogamy	789	197.1	154	0.00414
All	Quantile 1	GO:0006801	superoxide metabolic process	95	23.73	30	0.00417
All	Quantile 1	GO:0010094	specification of carpel identity	15	3.75	9	0.00417
All	Quantile 1	GO:0000724	double-strand break repair via homologous recombination	711	177.62	206	0.00422
All	Quantile 1	GO:0002181	cytoplasmic translation	195	48.71	74	0.00431
All	Quantile 1	GO:0008610	lipid biosynthetic process	5578	1393.45	1474	0.00447
All	Quantile 1	GO:0006475	internal protein amino acid acetylation	208	51.96	75	0.0046
All	Quantile 1	GO:0008612	peptidyl-lysine modification to peptidyl-hypusine	23	5.75	12	0.00461
All	Quantile 1	GO:0045948	positive regulation of translational initiation	23	5.75	12	0.00461
All	Quantile 1	GO:0031456	glycine betaine biosynthetic process	15	3.75	9	0.00462
All	Quantile 1	GO:0017198	N-terminal peptidyl-serine acetylation	6	1.5	5	0.00462
All	Quantile 1	GO:0018002	N-terminal peptidyl-glutamic acid acetylation	6	1.5	5	0.00462
All	Quantile 1	GO:0019358	nicotinate nucleotide salvage	6	1.5	5	0.00462
All	Quantile 1	GO:0019388	galactose catabolic process	6	1.5	5	0.00462
All	Quantile 1	GO:0019918	peptidyl-arginine methylation, to symmetrical-dimethyl arginine	6	1.5	5	0.00462
All	Quantile 1	GO:0031567	mitotic cell size control checkpoint	6	1.5	5	0.00462
All	Quantile 1	GO:0032049	cardiolipin biosynthetic process	6	1.5	5	0.00462
All	Quantile 1	GO:0019566	arabinose metabolic process	43	10.74	12	0.00462
All	Quantile 1	GO:0070988	demethylation	126	31.48	47	0.00467
All	Quantile 1	GO:0090116	C-5 methylation of cytosine	46	11.49	20	0.00469
All	Quantile 1	GO:1902290	positive regulation of defense response to oomycetes	103	25.73	38	0.00484
All	Quantile 1	GO:0009793	embryo development ending in seed dormancy	4164	1040.22	1061	0.00484
All	Quantile 1	GO:0048449	floral organ formation	1245	311.02	323	0.00486
All	Quantile 1	GO:0034976	response to endoplasmic reticulum stress	2677	668.75	663	0.00486
All	Quantile 1	GO:0006906	vesicle fusion	142	35.47	56	0.00506
All	Quantile 1	GO:2000031	regulation of salicylic acid mediated signaling pathway	142	35.47	48	0.00526
All	Quantile 1	GO:1901135	carbohydrate derivative metabolic process	8005	1999.75	2062	0.00526
All	Quantile 1	GO:0045333	cellular respiration	714	178.37	230	0.0053
All	Quantile 1	GO:0019919	peptidyl-arginine methylation, to asymmetrical-dimethyl arginine	18	4.5	10	0.00539
All	Quantile 1	GO:0007584	response to nutrient	375	93.68	80	0.00539
All	Quantile 1	GO:0007052	mitotic spindle organization	63	15.74	16	0.0054
All	Quantile 1	GO:0061136	regulation of proteasomal protein catabolic process	212	52.96	62	0.00559
All	Quantile 1	GO:0009615	response to virus	2235	558.33	594	0.0056
All	Quantile 1	GO:0010390	histone monoubiquitination	13	3.25	8	0.00562
All	Quantile 1	GO:0048505	regulation of timing of cell differentiation	13	3.25	8	0.00562
All	Quantile 1	GO:0044267	cellular protein metabolic process	20848	5208.08	5857	0.00575
All	Quantile 1	GO:0018108	peptidyl-tyrosine phosphorylation	126	31.48	50	0.00586
All	Quantile 1	GO:0006414	translational elongation	235	58.71	80	0.00608
All	Quantile 1	GO:0051321	meiotic cell cycle	1703	425.43	473	0.00613
All	Quantile 1	GO:0000188	inactivation of MAPK activity	44	10.99	19	0.00632
All	Quantile 1	GO:0006384	transcription initiation from RNA polymerase III promoter	21	5.25	11	0.00638
All	Quantile 1	GO:0016255	attachment of GPI anchor to protein	21	5.25	11	0.00638
All	Quantile 1	GO:0048507	meristem development	3561	889.58	828	0.00643
All	Quantile 1	GO:0010106	cellular response to iron ion starvation	984	245.82	280	0.00683
All	Quantile 1	GO:0046741	transport of virus in host, tissue to tissue	24	6	12	0.00715
All	Quantile 1	GO:0042147	retrograde transport, endosome to Golgi	63	15.74	25	0.00715
All	Quantile 1	GO:0043247	telomere maintenance in response to DNA damage	294	73.44	91	0.00744
All	Quantile 1	GO:0016573	histone acetylation	202	50.46	70	0.00749
All	Quantile 1	GO:0016226	iron-sulfur cluster assembly	343	85.69	105	0.00783
All	Quantile 1	GO:0006281	DNA repair	2006	501.12	600	0.00828
All	Quantile 1	GO:0009853	photorespiration	601	150.14	178	0.00834
All	Quantile 1	GO:0001676	long-chain fatty acid metabolic process	118	29.48	43	0.00879
All	Quantile 1	GO:0019941	modification-dependent protein catabolic process	3421	854.61	935	0.00894
All	Quantile 1	GO:0009910	negative regulation of flower development	168	41.97	56	0.0093
All	Quantile 1	GO:0006303	double-strand break repair via nonhomologous end joining	58	14.49	23	0.00973
All	Quantile 1	GO:0000027	ribosomal large subunit assembly	97	24.23	35	0.00979
All	Quantile 1	GO:0007062	sister chromatid cohesion	489	122.16	147	0.00988
All	Quantile 1	GO:0000466	maturation of 5.8S rRNA from tricistronic rRNA transcript (SSU-rRNA, 5.8S rRNA, LSU-rRNA)	69	17.24	25	0.0099
All	Quantile 1	GO:0002940	tRNA N2-guanine methylation	9	2.25	6	0.00995
All	Quantile 1	GO:0006428	isoleucyl-tRNA aminoacylation	9	2.25	6	0.00995
All	Quantile 1	GO:0019255	glucose 1-phosphate metabolic process	9	2.25	6	0.00995
All	Quantile 1	GO:0019628	urate catabolic process	9	2.25	6	0.00995
All	Quantile 1	GO:0043007	maintenance of rDNA	9	2.25	6	0.00995
All	Quantile 1	GO:0001678	cellular glucose homeostasis	86	21.48	25	0.00995
All	Quantile 1	GO:0006144	purine nucleobase metabolic process	86	21.48	16	0.00997
All	Quantile 1	GO:0055069	zinc ion homeostasis	173	43.22	59	0.01004
All	Quantile 1	GO:0048193	Golgi vesicle transport	1308	326.75	360	0.01011
All	Quantile 1	GO:0043687	post-translational protein modification	462	115.41	143	0.0102
All	Quantile 1	GO:1900150	regulation of defense response to fungus	155	38.72	51	0.01083
All	Quantile 1	GO:0006458	'de novo' protein folding	83	20.73	33	0.01153
All	Quantile 1	GO:0006284	base-excision repair	108	26.98	38	0.01153
All	Quantile 1	GO:0000911	cytokinesis by cell plate formation	1068	266.8	246	0.01182
All	Quantile 1	GO:0006446	regulation of translational initiation	135	33.72	51	0.01217
All	Quantile 1	GO:0048640	negative regulation of developmental growth	46	11.49	21	0.0123
All	Quantile 1	GO:0031125	rRNA 3'-end processing	50	12.49	18	0.01231
All	Quantile 1	GO:0034243	regulation of transcription elongation from RNA polymerase II promoter	48	11.99	17	0.01283
All	Quantile 1	GO:0000395	mRNA 5'-splice site recognition	7	1.75	5	0.01283
All	Quantile 1	GO:0006907	pinocytosis	7	1.75	5	0.01283
All	Quantile 1	GO:0009303	rRNA transcription	7	1.75	5	0.01283
All	Quantile 1	GO:0048446	petal morphogenesis	268	66.95	73	0.0131
All	Quantile 1	GO:0035196	production of miRNAs involved in gene silencing by miRNA	500	124.91	144	0.01327
All	Quantile 1	GO:0009231	riboflavin biosynthetic process	53	13.24	21	0.01328
All	Quantile 1	GO:0042254	ribosome biogenesis	1625	405.94	476	0.01362
All	Quantile 1	GO:0006563	L-serine metabolic process	88	21.98	32	0.01376
All	Quantile 1	GO:0006346	methylation-dependent chromatin silencing	445	111.17	132	0.01392
All	Quantile 1	GO:0016032	viral process	368	91.93	115	0.01397
All	Quantile 1	GO:0009168	purine ribonucleoside monophosphate biosynthetic process	1458	364.23	378	0.01415
All	Quantile 1	GO:0000730	DNA recombinase assembly	34	8.49	17	0.01417
All	Quantile 1	GO:0006580	ethanolamine metabolic process	12	3	7	0.01419
All	Quantile 1	GO:0010258	NADH dehydrogenase complex (plastoquinone) assembly	12	3	7	0.01419
All	Quantile 1	GO:0031990	mRNA export from nucleus in response to heat stress	12	3	7	0.01419
All	Quantile 1	GO:1905011	transmembrane phosphate ion transport from cytosol to vacuole	12	3	7	0.01419
All	Quantile 1	GO:0006665	sphingolipid metabolic process	313	78.19	88	0.01424
All	Quantile 1	GO:0000302	response to reactive oxygen species	3396	848.36	791	0.01451
All	Quantile 1	GO:0006123	mitochondrial electron transport, cytochrome c to oxygen	23	5.75	11	0.01476
All	Quantile 1	GO:0006545	glycine biosynthetic process	23	5.75	11	0.01476
All	Quantile 1	GO:0032456	endocytic recycling	23	5.75	11	0.01476
All	Quantile 1	GO:0048730	epidermis morphogenesis	23	5.75	11	0.01476
All	Quantile 1	GO:0043207	response to external biotic stimulus	16721	4177.11	4393	0.015
All	Quantile 1	GO:0006887	exocytosis	342	85.44	90	0.01522
All	Quantile 1	GO:0010045	response to nickel cation	618	154.38	165	0.01525
All	Quantile 1	GO:0006312	mitotic recombination	235	58.71	75	0.01533
[truncated: 3,353 more rows]

## Sheet: TableS9
Supplemental Table S9. GO slim term enrichment analysis of genes grouped by decreasing ASY1 ChIP-seq signal. Genes grouped into four quantiles defined by decreasing ASY1 ChIP-seq signal (log2[ChIP/input]) (across all subgenomes or within each subgenome) were analyzed for enrichment of “biological process” GO slim terms, relative to their representation among all genes in the genome or the corresp…
[truncated: 194 more rows]

[truncated: 15 more sheets: TableS10, TableS11, TableS12, TableS13, TableS14, TableS15, TableS16, TableS17, TableS18, TableS19, TableS20, TableS21, TableS22, TableS23, TableS24]
